# Supplementary material for: Combined miRNA and mRNA sequencing reveals the defensive strategies of resistant YHY15 rice against differentially virulent brown planthoppers
Source: Front Plant Sci. 2024 Mar 18;15:1366515. doi: 10.3389/fpls.2024.1366515 (PMC10982320; doi:10.3389/fpls.2024.1366515)
Supplement: Supplementary file 10 [file Table_9.xlsx]

## Sheet: Sheet1
Supplementary Table 9. The list of BPH-responsive transcription factors in all comparisons
Supplementary Table 9-1. The list of BPH-responsive transcription factors shown in Supplementary Figure 6
TF family	RT6/R0 (log2FoldChange)	RT48/R0 (log2FoldChange)	RY6/R0 (log2FoldChange)	RY48/R0 (log2FoldChange)	id	MSU	RAP	TF_anno	Nr_des
bHLH	2.75737	1.68929	2.48423	2.44789	LOC4327669	LOC_Os01g50940	Os01g0705700	LOC_Os01g50940.1
bHLH	4.12218	3.59873	2.24723	1.37107	LOC4334060	LOC_Os03g53020	Os03g0741100	LOC_Os03g53020.1
bHLH	6.39994	4.82394	4.47297	3.57398	LOC4335417	LOC_Os04g23550	Os04g0301500	LOC_Os04g23550.1;LOC_Os04g23550.2
bHLH	0	1.78476	1.95219	2.08347	LOC4330462	LOC_Os02g47660	Os02g0705500	LOC_Os02g47660.1
bHLH	0	1.43946	2.26233	1.55228	LOC9269440	LOC_Os05g46370	Os05g0541400	LOC_Os05g46370.1
bHLH	-1.02606	0	-1.17328	-1.59314	LOC4329698	LOC_Os02g35660	Os02g0564700	LOC_Os02g35660.1
bHLH	-1.70547	0	-1.80489	-1.95438	LOC4332972	LOC_Os03g26210	Os03g0379300	LOC_Os03g26210.1;LOC_Os03g26210.2;LOC_Os03g26210.3
bHLH	-1.07545	0	-2.09414	-1.79302	LOC4342383	LOC_Os07g05010	Os07g0143200	LOC_Os07g05010.1;LOC_Os07g05010.2;LOC_Os07g05010.3
bHLH	0	0	-4.34202	-4.45518	LOC9269769	LOC_Os02g12820	Os02g0221100	LOC_Os02g12820.1
bHLH	0	0	-3.431	-2.22244	LOC4327934	LOC_Os01g38610	Os01g0566800	LOC_Os01g38610.1
bHLH	0	0	-2.20343	-2.25741	LOC4334324	LOC_Os03g56950	Os03g0782500	LOC_Os03g56950.1;LOC_Os03g56950.2;LOC_Os03g56950.3;LOC_Os03g56950.4;LOC_Os03g56950.5;LOC_Os03g56950.6;LOC_Os03g56950.7
bHLH	0	0	-2.04384	-2.87946	LOC4349351	LOC_Os10g40740	Os10g0556200	LOC_Os10g40740.1
bHLH	0	0	-2.01685	-2.11675	LOC4339235	LOC_Os05g42180	Os05g0501200	LOC_Os05g42180.1
bHLH	0	0	-1.9061	-1.10864	LOC4326162	LOC_Os01g01840	Os01g0108400	LOC_Os01g01840.1
bHLH	0	0	-1.79449	-2.0003	LOC9271688	LOC_Os08g08160	Os08g0179400	LOC_Os08g08160.1
bHLH	0	0	-1.59097	-1.56517	LOC4347601	LOC_Os09g34330	Os09g0519100	LOC_Os09g34330.1
bHLH	0	0	-1.29302	-1.16912	LOC4334429	LOC_Os03g58330	Os03g0797600	LOC_Os03g58330.1
bHLH	0	0	-1.25158	-1.76148	LOC9270162	LOC_Os03g43810	Os03g0639300	LOC_Os03g43810.1
bHLH	0	0	1.13478	1.32121	LOC4346166	LOC_Os08g42470	Os08g0536800	LOC_Os08g42470.1
bHLH	0	0	1.26811	1.41894	LOC4348490	LOC_Os10g23050	Os10g0376900	LOC_Os10g23050.1
bHLH	0	0	1.31407	1.27274	LOC4331778	LOC_Os03g07540	Os03g0171700	LOC_Os03g07540.1
bHLH	0	0	1.53045	1.36887	LOC4331887	LOC_Os03g08930	Os03g0188400	LOC_Os03g08930.1
bHLH	0	0	1.63695	1.43239	LOC9271931	LOC_Os06g50900	Os06g0724800	LOC_Os06g50900.1
bHLH	0	0	1.73173	1.81823	LOC107277392	LOC_Os10g26460	Os10g0404300	LOC_Os10g26460.1
bHLH	0	0	1.76057	1.75138	LOC4330593	LOC_Os02g49480	Os02g0726700	LOC_Os02g49480.1
bHLH	0	0	3.29921	3.10287	LOC4345836	LOC_Os08g37290	Os08g0477900	LOC_Os08g37290.1
bHLH	0	0	3.74643	3.789	LOC4333691	LOC_Os03g46860	Os03g0671800	LOC_Os03g46860.1
bHLH	0	0	6.7825	7.05531	LOC4350872	LOC_Os11g39000	Os11g0603000	LOC_Os11g39000.1;LOC_Os11g39000.2
bHLH	0	0	7.33652	7.13377	LOC9268995	LOC_Os03g17130	Os03g0279500	LOC_Os03g17130.1
bHLH	6.73826	0	0	5.86476	LOC4337905	LOC_Os05g07120	Os05g0163900	LOC_Os05g07120.1;LOC_Os05g07120.2
bHLH	-4.75501	0	0	-6.51198	LOC4325750	LOC_Os01g72370	Os01g0952800	LOC_Os01g72370.1;LOC_Os01g72370.2;LOC_Os01g72370.3
bHLH	0	0	0	4.10415	LOC107275851	LOC_Os06g10820	Os06g0210600	LOC_Os06g10820.1
bHLH	0	0	0	6.44781	LOC112937659	LOC_Os01g33400	Os01g0518300	LOC_Os01g33400.1
bHLH	0	0	0	-1.2546	LOC4324583	LOC_Os01g11910	Os01g0218100	LOC_Os01g11910.1
bHLH	0	0	0	1.18975	LOC4326301	LOC_Os01g01600	Os01g0105700	LOC_Os01g01600.1
bHLH	0	0	0	-1.20701	LOC4338978	LOC_Os05g38140	Os05g0455400	LOC_Os05g38140.1
bHLH	1.92493	1.91351	1.22735	0	LOC4326315	LOC_Os01g39330	Os01g0575200	LOC_Os01g39330.1
bHLH	0	0	1.50076	0	LOC107276337	LOC_Os03g55550	Os03g0764200	LOC_Os03g55550.1
bHLH	0	0	-1.24706	0	LOC4327040	LOC_Os01g57580	Os01g0784900	LOC_Os01g57580.1
bHLH	0	0	1.00895	0	LOC4330725	LOC_Os02g51320	Os02g0747900	LOC_Os02g51320.1
bHLH	0	0	-1.08847	0	LOC4340229	LOC_Os06g06900	Os06g0164400	LOC_Os06g06900.1
bHLH	0	0	1.05611	0	LOC4340551	LOC_Os06g12210	Os06g0226500	LOC_Os06g12210.1
bHLH	0	0	1.29064	0	LOC4345867	LOC_Os08g37730	Os08g0483900	LOC_Os08g37730.1
bHLH	0	0	1.62109	0	LOC4350609	LOC_Os11g32100	Os11g0523700	LOC_Os11g32100.1
bHLH	0	0	-1.80334	0	LOC9267649	LOC_Os01g01840	Os01g0108500	LOC_Os01g01840.1
bHLH	0	0	-1.33388	0	LOC9269507	LOC_Os04g23440	Os04g0300600	LOC_Os04g23440.1
bHLH	7.71502	7.26106	0	0	LOC9269465	LOC_Os01g56690	Os01g0773800	LOC_Os01g56690.1
bHLH	1.79327	0	0	0	LOC107278005	LOC_Os08g36740	Os08g0471401	LOC_Os08g36740.1
bHLH	1.30228	0	0	0	LOC4335553	LOC_Os04g28280	Os04g0350700	LOC_Os04g28280.1
bHLH	1.51474	0	0	0	LOC4343984	LOC_Os07g43530	Os07g0628500	LOC_Os07g43530.1;LOC_Os07g43530.2
bHLH	2.25428	0	0	0	LOC4347252	LOC_Os09g28210	Os09g0455300	LOC_Os09g28210.1
bHLH	-1.39846	0	0	0	LOC4336636	LOC_Os04g47080	Os04g0557800	LOC_Os04g47080.1
MYB	4.73432	4.02769	3.53644	2.56132	LOC4324783	LOC_Os01g64360	Os01g0863300	LOC_Os01g64360.1	transcription factor DIVARICATA [Oryza sativa Japonica Group] &gt;EAZ14242.1 hypothetical protein OsJ_04166 [Oryza sativa Japonica Group] &gt;KAF2953455.1 hypothetical protein DAI22_01g409600 [Oryza sativa Japonica Group]
MYB	2.6291	2.8845	3.29245	3.15561	LOC4328551	LOC_Os02g09480	Os02g0187700	LOC_Os02g09480.1	NA
MYB	2.96166	2.72724	1.62588	1.39918	LOC4330001	LOC_Os02g40530	Os02g0618400	LOC_Os02g40530.1	transcription factor MYB57 [Oryza sativa Japonica Group] &gt;EAZ23831.1 hypothetical protein OsJ_07548 [Oryza sativa Japonica Group] &gt;BAD21458.1 putative MYB transcription factor [Oryza sativa Japonica Group] &gt;BAD21600.1 putative MYB transcription factor [Oryza sativa Japonica Group] &gt;BAF09363.1 Os02g0618400 [Oryza sativa Japonica Group] &gt;BAG99431.1 unnamed protein product [Oryza sati…
MYB	2.05223	2.10866	1.72537	1.57376	LOC4341607	LOC_Os06g43090	Os06g0637500	LOC_Os06g43090.1	NA
MYB	-1.59716	-1.62808	-2.98678	-2.34359	LOC4351184	LOC_Os11g47460	Os11g0700500	LOC_Os11g47460.1;LOC_Os11g47460.2;LOC_Os11g47460.3;LOC_Os11g47460.4	NA
MYB	-1.66487	-1.60716	-2.01713	-2.42477	LOC4352559	LOC_Os12g37970	Os12g0567300	LOC_Os12g37970.1;LOC_Os12g37970.2;LOC_Os12g37970.3	myb-related protein MYBAS2 isoform X1 [Oryza sativa Japonica Group]
MYB	0	-1.91416	-1.83014	-2.17911	LOC4340430	LOC_Os06g10350	Os06g0205100	LOC_Os06g10350.1	anthocyanin regulatory C1 protein [Oryza sativa Japonica Group] &gt;BAD36195.1 Myb protein [Oryza sativa Japonica Group] &gt;BAF19004.1 Os06g0205100 [Oryza sativa Japonica Group]
MYB	0	-1.06708	-2.00536	-1.59725	LOC4327914	LOC_Os01g18240	Os01g0285300	LOC_Os01g18240.1	transcription factor MYB61 [Oryza sativa Japonica Group] &gt;KAB8081039.1 hypothetical protein EE612_001879 [Oryza sativa] &gt;EAZ11477.1 hypothetical protein OsJ_01345 [Oryza sativa Japonica Group] &gt;KAF2949694.1 hypothetical protein DAI22_01g130300 [Oryza sativa Japonica Group] &gt;BAB39972.1 putative transcription factor (myb) [Oryza sativa Japonica Group] &gt;BAB39987.1 putative MYB2 [Oryza…
MYB	0	0	3.00793	3.17013	LOC4330121	LOC_Os02g42870	Os02g0641900	LOC_Os02g42870.1	NA
MYB	0	0	1.91623	1.85771	LOC4336055	LOC_Os04g38740	Os04g0461000	LOC_Os04g38740.1	transcription factor MYB106 [Oryza sativa Japonica Group] &gt;EAY94406.1 hypothetical protein OsI_16174 [Oryza sativa Indica Group] &gt;KAF2934342.1 hypothetical protein DAI22_04g155800 [Oryza sativa Japonica Group] &gt;CAD40986.2 OSJNBa0072F16.11 [Oryza sativa Japonica Group] &gt;BAF14907.1 Os04g0461000 [Oryza sativa Japonica Group] &gt;BAS89548.1 Os04g0461000 [Oryza sativa Japonica Group]
MYB	0	0	1.51895	1.29428	LOC4329770	LOC_Os02g36890	Os02g0579300	LOC_Os02g36890.1	transcription factor MYB106 [Oryza sativa Japonica Group] &gt;EAY86420.1 hypothetical protein OsI_07800 [Oryza sativa Indica Group] &gt;KAF2945499.1 hypothetical protein DAI22_02g220600 [Oryza sativa Japonica Group] &gt;BAF09143.1 Os02g0579300 [Oryza sativa Japonica Group]
MYB	0	0	1.5048	1.455	LOC4345652	LOC_Os08g33660	Os08g0433400	LOC_Os08g33660.1	transcription factor MYB106 [Oryza sativa Japonica Group] &gt;XP_052165507.1 transcription factor MYB106-like [Oryza glaberrima] &gt;EAZ07091.1 hypothetical protein OsI_29338 [Oryza sativa Indica Group] &gt;EAZ42840.1 hypothetical protein OsJ_27428 [Oryza sativa Japonica Group] &gt;KAF2919803.1 hypothetical protein DAI22_08g162700 [Oryza sativa Japonica Group] &gt;CAD44619.1 MYB27 protein [Oryza …
MYB	0	0	1.49897	1.48198	LOC4327192	LOC_Os01g12860	Os01g0229000	LOC_Os01g12860.1	transcription factor MYB3R-1 [Oryza sativa Japonica Group] &gt;KAF2949217.1 hypothetical protein DAI22_01g090800 [Oryza sativa Japonica Group]
MYB	0	0	1.36536	1.12914	LOC4330115	LOC_Os02g42850	Os02g0641300	LOC_Os02g42850.2;LOC_Os02g42850.1	transcription factor MYB21 [Oryza sativa Japonica Group] &gt;ACF60467.1 ATMYB4-like protein [Oryza sativa Japonica Group] &gt;EAZ23961.1 hypothetical protein OsJ_07687 [Oryza sativa Japonica Group] &gt;BAD25225.1 ATMYB4-like [Oryza sativa Japonica Group] &gt;BAD25373.1 ATMYB4-like [Oryza sativa Japonica Group]
MYB	0	0	1.02693	1.05491	LOC4339005	LOC_Os05g38460	Os05g0459000	LOC_Os05g38460.1	transcription factor MYB3R-2-like [Oryza sativa Japonica Group] &gt;KAF2931121.1 hypothetical protein DAI22_05g186500 [Oryza sativa Japonica Group] &gt;KAF2931122.1 hypothetical protein DAI22_05g186500 [Oryza sativa Japonica Group]
MYB	0	0	-1.07171	-1.0977	LOC9271088	LOC_Os09g36730	Os09g0538400	LOC_Os09g36730.1	myb-related protein Hv1-like [Oryza sativa Japonica Group] &gt;XP_025876044.1 myb-related protein Hv1-like [Oryza sativa Japonica Group] &gt;XP_052166766.1 myb-related protein Hv1-like [Oryza glaberrima] &gt;EAZ09902.1 hypothetical protein OsI_32196 [Oryza sativa Indica Group] &gt;KAB8111517.1 hypothetical protein EE612_049198 [Oryza sativa] &gt;ADX60239.1 MYB transcription factor, partial [Oryza…
MYB	0	0	-1.09721	-1.25311	LOC4332651	LOC_Os03g20090	Os03g0315400	LOC_Os03g20090.1	transcription factor MYB2 [Oryza sativa Japonica Group] &gt;Q10MB4.1 RecName: Full=Transcription factor MYB2; AltName: Full=Myb-related protein 2; Short=OsMYB2 [Oryza sativa Japonica Group] &gt;ABF95617.1 Myb-like DNA-binding domain containing protein, expressed [Oryza sativa Japonica Group] &gt;KAF2938963.1 hypothetical protein DAI22_03g156300 [Oryza sativa Japonica Group] &gt;BAF11851.1 Os03g03…
MYB	0	0	-1.43255	-1.33595	LOC4323911	LOC_Os01g19970	Os01g0305900	LOC_Os01g19970.1	myb-related protein P [Oryza sativa Japonica Group] &gt;EEE54417.1 hypothetical protein OsJ_01463 [Oryza sativa Japonica Group] &gt;BAB20661.1 putative R2R3 Myb transcription factor MYB-IF35 [Oryza sativa Japonica Group] &gt;BAB64029.1 putative R2R3 Myb transcription factor MYB-IF35 [Oryza sativa Japonica Group] &gt;BAS71749.1 Os01g0305900 [Oryza sativa Japonica Group]
MYB	0	0	-1.43989	-1.35997	LOC4330397	LOC_Os02g46780	Os02g0695200	LOC_Os02g46780.1	myb-related protein Zm1 [Oryza sativa Japonica Group] &gt;EAZ24264.1 hypothetical protein OsJ_08015 [Oryza sativa Japonica Group] &gt;KAF2946464.1 hypothetical protein DAI22_02g295500 [Oryza sativa Japonica Group] &gt;BAD07916.1 putative myb-related protein 1 [Oryza sativa Japonica Group] &gt;BAD08151.1 putative myb-related protein 1 [Oryza sativa Japonica Group] &gt;BAF09723.1 Os02g0695200 [Oryz…
MYB	0	0	-1.50647	-1.27895	LOC4338503	LOC_Os05g28320	Os05g0350900	LOC_Os05g28320.1	transcription factor MYB77 [Oryza sativa Japonica Group]
MYB	0	0	-1.91166	-1.43152	LOC4327303	LOC_Os01g09590	Os01g0191900	LOC_Os01g09590.1	transcription factor RAX2 [Oryza sativa Japonica Group] &gt;XP_015628427.1 transcription factor RAX2 [Oryza sativa Japonica Group] &gt;EAZ10868.1 hypothetical protein OsJ_00708 [Oryza sativa Japonica Group] &gt;BAA99440.1 putative typical P-type R2R3 Myb protein [Oryza sativa Japonica Group] &gt;BAB12688.1 putative typical P-type R2R3 Myb protein [Oryza sativa Japonica Group] &gt;BAF04189.1 Os01g…
MYB	0	0	-2.02186	-1.22993	LOC4324302	LOC_Os01g74410	Os01g0975300	LOC_Os01g74410.1;LOC_Os01g74410.2	transcription factor MYB59 [Oryza sativa Japonica Group] &gt;AAU84433.1 MYB transcription factor [Oryza sativa Japonica Group] &gt;EAZ15015.1 hypothetical protein OsJ_04957 [Oryza sativa Japonica Group] &gt;KAF2954568.1 hypothetical protein DAI22_01g492500 [Oryza sativa Japonica Group]
MYB	0	0	-2.09633	-1.64076	LOC4345623	LOC_Os08g33150	Os08g0428200	LOC_Os08g33150.1	transcription factor MYB20 [Oryza sativa Japonica Group] &gt;CAC85050.1 Myb51 protein [Oryza sativa] &gt;KAF2919752.1 hypothetical protein DAI22_08g159300 [Oryza sativa Japonica Group] &gt;KAF2919753.1 hypothetical protein DAI22_08g159300 [Oryza sativa Japonica Group] &gt;BAC75626.1 Myb51 protein [Oryza sativa Japonica Group] &gt;BAD01194.1 Myb51 protein [Oryza sativa Japonica Group]
MYB	0	0	-2.23384	-1.89807	LOC4336841	LOC_Os04g50770	Os04g0594100	LOC_Os04g50770.1	myb-related protein Zm1 [Oryza sativa Japonica Group] &gt;CAH67984.1 OSIGBa0142I02-OSIGBa0101B20.27 [Oryza sativa] &gt;KAF2935620.1 hypothetical protein DAI22_04g245400 [Oryza sativa Japonica Group] &gt;CAD41558.3 OSJNBa0006A01.12 [Oryza sativa Japonica Group] &gt;CAE04147.1 OSJNBa0009P12.32 [Oryza sativa Japonica Group] &gt;BAF15640.1 Os04g0594100 [Oryza sativa Japonica Group]
MYB	0	0	-2.91064	-1.53926	LOC9272734	LOC_Os08g33940	Os08g0437300	LOC_Os08g33940.1	myb-related protein 306 [Oryza sativa Japonica Group] &gt;KAF2919838.1 hypothetical protein DAI22_08g165000 [Oryza sativa Japonica Group] &gt;BAD10148.1 putative typical P-type R2R3 Myb protein [Oryza sativa Japonica Group] &gt;BAH94325.1 Os08g0437200 [Oryza sativa Japonica Group]
MYB	0	0	-3.57531	-2.31849	LOC4349657	LOC_Os11g03440	Os11g0128500	LOC_Os11g03440.1	myb-related protein 306 [Oryza sativa Japonica Group] &gt;XP_052136887.1 transcription factor MYB60-like [Oryza glaberrima] &gt;EAY79788.1 hypothetical protein OsI_34944 [Oryza sativa Indica Group] &gt;ABA91289.1 Myb-like DNA-binding domain containing protein, expressed [Oryza sativa Japonica Group] &gt;EAZ17275.1 hypothetical protein OsJ_32794 [Oryza sativa Japonica Group] &gt;KAF2909282.1 hypot…
MYB	0	0	-3.6163	-2.23195	LOC4351379	LOC_Os12g03150	Os12g0125000	LOC_Os12g03150.1	myb-related protein 306 [Oryza sativa Japonica Group] &gt;EAY82118.1 hypothetical protein OsI_37315 [Oryza sativa Indica Group] &gt;ABA96337.1 Myb-like DNA-binding domain containing protein, expressed [Oryza sativa Japonica Group] &gt;EAZ19502.1 hypothetical protein OsJ_35067 [Oryza sativa Japonica Group] &gt;KAF2906442.1 hypothetical protein DAI22_12g018400 [Oryza sativa Japonica Group] &gt;CAA7…
MYB	0	0	-1.264	0	LOC4333934	LOC_Os03g51110	Os03g0720800	LOC_Os03g51110.1	transcription factor MYB52 [Oryza sativa Japonica Group] &gt;XP_052146736.1 transcription factor MYB52-like [Oryza glaberrima] &gt;KAB8093331.1 hypothetical protein EE612_020106 [Oryza sativa] &gt;AAM47303.1 putative Myb/Myb-related protein [Oryza sativa Japonica Group] &gt;AAT77852.1 putative Myb-like DNA-binding protein [Oryza sativa Japonica Group] &gt;ABF98587.1 Myb-like DNA-binding domain co…
MYB	0	0	-3.75285	0	LOC4324664	LOC_Os01g52410	Os01g0722300	LOC_Os01g52410.1	transcription repressor MYB5 [Oryza sativa Japonica Group] &gt;XP_052138364.1 transcription repressor MYB5-like [Oryza glaberrima] &gt;EAY75656.1 hypothetical protein OsI_03562 [Oryza sativa Indica Group] &gt;KAF2952063.1 hypothetical protein DAI22_01g307500 [Oryza sativa Japonica Group] &gt;BAD87052.1 blind-like [Oryza sativa Japonica Group] &gt;BAD87407.1 blind-like [Oryza sativa Japonica Group…
MYB	0	0	-1.37247	0	LOC4340683	LOC_Os06g14670	Os06g0258000	LOC_Os06g14670.1	protein ODORANT1 [Oryza sativa Japonica Group] &gt;ADB84639.1 Myb related transcription factor [Oryza sativa Japonica Group] &gt;EAZ36535.1 hypothetical protein OsJ_20870 [Oryza sativa Japonica Group] &gt;BAD46186.1 putative myb factor [Oryza sativa Japonica Group] &gt;BAD46321.1 putative myb factor [Oryza sativa Japonica Group] &gt;BAF19236.1 Os06g0258000 [Oryza sativa Japonica Group]
MYB	0	0	-2.07214	0	LOC9272091	LOC_Os12g07640	Os12g0175400	LOC_Os12g07640.1	myb-related protein 308 [Oryza sativa Japonica Group] &gt;ABA96597.1 MYB10, putative, expressed [Oryza sativa Japonica Group] &gt;KAF2906880.1 hypothetical protein DAI22_12g053700 [Oryza sativa Japonica Group] &gt;BAG88524.1 unnamed protein product [Oryza sativa Japonica Group] &gt;BAH95541.1 Os12g0175400 [Oryza sativa Japonica Group]
MYB	0	0	1.35275	0	LOC4330764	LOC_Os02g51799	Os02g0754400	LOC_Os02g51799.1	transcription factor MYB41 [Oryza sativa Japonica Group] &gt;XP_052143679.1 transcription factor MYB41-like [Oryza glaberrima] &gt;EEE57826.1 hypothetical protein OsJ_08424 [Oryza sativa Japonica Group] &gt;KAF2947019.1 hypothetical protein DAI22_02g338000 [Oryza sativa Japonica Group] &gt;BAD17238.1 putative P-type R2R3 Myb protein [Oryza sativa Japonica Group]
MYB	0	0	1.00892	0	LOC4336500	LOC_Os04g45020	Os04g0532800	LOC_Os04g45020.1	transcription factor LAF1 [Oryza sativa Japonica Group] &gt;EAY94956.1 hypothetical protein OsI_16764 [Oryza sativa Indica Group] &gt;KAB8096233.1 hypothetical protein EE612_024592 [Oryza sativa] &gt;KAF2935078.1 hypothetical protein DAI22_04g206600 [Oryza sativa Japonica Group] &gt;CAE04569.1 OSJNBb0039L24.8 [Oryza sativa Japonica Group] &gt;BAF15320.1 Os04g0532800 [Oryza sativa Japonica Group]
MYB	0	0	1.00917	0	LOC9268190	LOC_Os01g49160	Os01g0685400	LOC_Os01g49160.1	transcription factor MYB4-like [Oryza sativa Japonica Group] &gt;XP_052146336.1 transcription factor MYB4-like [Oryza glaberrima] &gt;EAY75402.1 hypothetical protein OsI_03303 [Oryza sativa Indica Group] &gt;KAF2951705.1 hypothetical protein DAI22_01g282200 [Oryza sativa Japonica Group] &gt;BAB86065.1 myb-related transcription factor LBM2-like [Oryza sativa Japonica Group] &gt;BAB92703.1 myb-rela…
MYB	0	0	1.45692	0	LOC4327821	LOC_Os01g51260	Os01g0709000	LOC_Os01g51260.1	myb-related protein Zm38 [Oryza sativa Japonica Group] &gt;KAF2951920.1 hypothetical protein DAI22_01g298100 [Oryza sativa Japonica Group] &gt;BAF05945.1 Os01g0709000 [Oryza sativa Japonica Group] &gt;BAS73963.1 Os01g0709000 [Oryza sativa Japonica Group]
MYB	0	0	1.05657	0	LOC4343988	LOC_Os07g43580	Os07g0629000	LOC_Os07g43580.1	transcription factor MYB30 [Oryza sativa Japonica Group] &gt;AAP92746.1 putative myb protein [Oryza sativa Japonica Group] &gt;KAF2924039.1 hypothetical protein DAI22_07g238700 [Oryza sativa Japonica Group]
MYB	0	0	1.34452	0	LOC4345885	LOC_Os08g37970	Os08g0486300	LOC_Os08g37970.1	transcription factor MYB93 [Oryza sativa Japonica Group] &gt;KAF2920201.1 hypothetical protein DAI22_08g192600 [Oryza sativa Japonica Group] &gt;BAD09322.1 putative transcription factor Myb protein [Oryza sativa Japonica Group] &gt;BAF24009.1 Os08g0486300 [Oryza sativa Japonica Group]
MYB	2.00107	2.59587	1.97749	0	LOC4330027	LOC_Os02g41510	Os02g0624300	LOC_Os02g41510.1	transcription factor MYB30-like [Oryza sativa Japonica Group] &gt;XP_052145300.1 transcription factor MYB30 [Oryza glaberrima] &gt;Q6K1S6.1 RecName: Full=Transcription factor MYB30; Short=OsMYB30 [Oryza sativa Japonica Group] &gt;EAY86754.1 hypothetical protein OsI_08134 [Oryza sativa Indica Group] &gt;KAB8088012.1 hypothetical protein EE612_012406 [Oryza sativa] &gt;EAZ23866.1 hypothetical prote…
MYB	2.08034	1.66485	1.47621	0	LOC4336407	LOC_Os04g43680	Os04g0517100	LOC_Os04g43680.1	NA
MYB	9.65736	6.29528	8.02148	0	LOC4338925	LOC_Os05g37060	Os05g0442400	LOC_Os05g37060.1	transcription factor DIVARICATA [Oryza sativa Japonica Group] &gt;EAY98215.1 hypothetical protein OsI_20126 [Oryza sativa Indica Group] &gt;KAB8099626.1 hypothetical protein EE612_029785 [Oryza sativa] &gt;AAT69605.1 putative myb-like transcription factor [Oryza sativa Japonica Group] &gt;AAU90097.1 putative myb-like transcription factor [Oryza sativa Japonica Group] &gt;EEE63882.1 hypothetical p…
MYB	1.00261	0	0	0	LOC4324770	LOC_Os01g65370	Os01g0874300	LOC_Os01g65370.1	myb-related protein 308 [Oryza sativa Japonica Group] &gt;XP_052141309.1 myb-related protein 308-like [Oryza glaberrima] &gt;EAY76672.1 hypothetical protein OsI_04627 [Oryza sativa Indica Group] &gt;KAB8084534.1 hypothetical protein EE612_007117 [Oryza sativa] &gt;EAZ14337.1 hypothetical protein OsJ_04260 [Oryza sativa Japonica Group] &gt;KAF2953584.1 hypothetical protein DAI22_01g418000 [Oryza s…
MYB	1.09009	0	0	0	LOC9266213	LOC_Os05g35500	Os05g0429900	LOC_Os05g35500.1	transcription factor MYB8 [Oryza sativa Japonica Group] &gt;EAY98145.1 hypothetical protein OsI_20061 [Oryza sativa Indica Group] &gt;KAB8099544.1 hypothetical protein EE612_029670 [Oryza sativa] &gt;AAV59423.1 putative myb protein [Oryza sativa Japonica Group] &gt;ACF60464.1 myb transcription factor [Oryza sativa Japonica Group] &gt;KAF2930905.1 hypothetical protein DAI22_05g170500 [Oryza sativa…
MYB	0	4.28178	0	0	LOC4326726	LOC_Os01g19330	Os01g0298400	LOC_Os01g19330.1	transcription factor MYB2-like [Oryza sativa Japonica Group] &gt;EAZ11558.1 hypothetical protein OsJ_01424 [Oryza sativa Japonica Group] &gt;KAF2949769.1 hypothetical protein DAI22_01g136300 [Oryza sativa Japonica Group] &gt;BAB55768.1 putative typical P-type R2R3 Myb protein [Oryza sativa Japonica Group] &gt;BAB67851.1 putative typical P-type R2R3 Myb protein [Oryza sativa Japonica Group] &gt;BA…
ERF	3.69822	3.26796	3.54132	3.18458	LOC4327287	LOC_Os01g21120	Os01g0313300	LOC_Os01g21120.1	ethylene-responsive transcription factor ERF071 [Oryza sativa Japonica Group] &gt;KAB8081166.1 hypothetical protein EE612_002120 [Oryza sativa] &gt;KAF2949845.1 hypothetical protein DAI22_01g146800 [Oryza sativa Japonica Group] &gt;BAB92777.1 putative ethylene response factor 2 [Oryza sativa Japonica Group] &gt;BAF04782.1 Os01g0313300 [Oryza sativa Japonica Group] &gt;BAG99412.1 unnamed protein p…
ERF	3.93102	3.66335	2.17124	1.60726	LOC4330189	LOC_Os02g43790	Os02g0654700	LOC_Os02g43790.1	NA
ERF	1.10855	1.75688	1.41257	1.45546	LOC4340244	LOC_Os06g07030	Os06g0166400	LOC_Os06g07030.1	ethylene-responsive transcription factor RAP2-9 [Oryza sativa Japonica Group] &gt;KAF2925381.1 hypothetical protein DAI22_06g047700 [Oryza sativa Japonica Group] &gt;BAD67600.1 putative AP2 domain containing protein RAP2.1 [Oryza sativa Japonica Group] &gt;BAD67863.1 putative AP2 domain containing protein RAP2.1 [Oryza sativa Japonica Group] &gt;BAF18828.1 Os06g0166400 [Oryza sativa Japonica Grou…
ERF	3.51615	4.87045	2.92412	4.26554	LOC9266984	LOC_Os07g22730	Os07g0410300	LOC_Os07g22730.1	ethylene-responsive transcription factor 15 [Oryza sativa Japonica Group] &gt;XP_052163223.1 ethylene-responsive transcription factor 15-like [Oryza glaberrima] &gt;EAZ03592.1 hypothetical protein OsI_25728 [Oryza sativa Indica Group] &gt;KAF2922423.1 hypothetical protein DAI22_07g112350 [Oryza sativa Japonica Group]
ERF	-1.27913	-1.03882	-1.43772	-1.1301	LOC4334558	LOC_Os03g60120	Os03g0815800	LOC_Os03g60120.1	ethylene-responsive transcription factor CRF5 [Oryza sativa Japonica Group] &gt;KAB8094167.1 hypothetical protein EE612_021266 [Oryza sativa] &gt;AAO60030.1 putative AP2 domain containing protein [Oryza sativa Japonica Group] &gt;AAR01751.1 putative AP2 domain transcription factor [Oryza sativa Japonica Group] &gt;ABF99541.1 AP2 domain containing protein, expressed [Oryza sativa Japonica Group] &…
ERF	2.32892	2.21963	1.21601	1.41141	LOC4336571	LOC_Os04g46220	Os04g0546800	LOC_Os04g46220.1	ethylene-responsive transcription factor 2 [Oryza sativa Japonica Group] &gt;KAB8096335.1 hypothetical protein EE612_024741 [Oryza sativa] &gt;ABK34954.1 development related ERF protein [Oryza sativa Japonica Group] &gt;KAF2935190.1 hypothetical protein DAI22_04g214700 [Oryza sativa Japonica Group] &gt;CAD41472.3 OSJNBa0079A21.16 [Oryza sativa Japonica Group] &gt;BAF15388.1 Os04g0546800 [Oryza sa…
ERF	6.87739	6.25672	5.69581	5.74605	LOC4344266	LOC_Os07g47790	Os07g0674800	LOC_Os07g47790.1;LOC_Os07g47790.2	ethylene-responsive transcription factor RAP2-3 [Oryza sativa Japonica Group] &gt;EAZ05119.1 hypothetical protein OsI_27312 [Oryza sativa Indica Group] &gt;KAF2924485.1 hypothetical protein DAI22_07g271800 [Oryza sativa Japonica Group] &gt;BAC83539.1 AP2 domain transcription factor EREBP [Oryza sativa Japonica Group] &gt;BAD31975.1 AP2 domain transcription factor EREBP [Oryza sativa Japonica Grou…
ERF	5.3921	5.19116	3.89043	3.63999	LOC4347618	LOC_Os09g35010	Os09g0522000	LOC_Os09g35010.1	dehydration-responsive element-binding protein 1B, partial [Oryza sativa Japonica Group]
ERF	5.22378	4.91519	4.0274	3.3697	LOC4347619	LOC_Os09g35020	Os09g0522100	LOC_Os09g35020.1	dehydration-responsive element-binding protein 1H [Oryza sativa Japonica Group] &gt;KAF2917129.1 hypothetical protein DAI22_09g169500 [Oryza sativa Japonica Group] &gt;BAD46703.1 putative CBF3-like protein [Oryza sativa Japonica Group]
ERF	5.63389	5.49118	4.45574	5.04862	LOC4347620	LOC_Os09g35030	Os09g0522200	LOC_Os09g35030.1	NA
ERF	0	1.3684	1.51492	1.6286	LOC4343912	LOC_Os07g42510	Os07g0617000	LOC_Os07g42510.1	ethylene-responsive transcription factor 1-like [Oryza sativa Japonica Group] &gt;EAZ40665.1 hypothetical protein OsJ_25135 [Oryza sativa Japonica Group] &gt;KAF2923929.1 hypothetical protein DAI22_07g230300 [Oryza sativa Japonica Group] &gt;BAC79864.1 EREB-like protein [Oryza sativa Japonica Group] &gt;BAC79993.1 EREB-like protein [Oryza sativa Japonica Group] &gt;BAF22194.1 Os07g0617000 [Oryza …
ERF	0	0	2.83882	2.70236	LOC4326729	LOC_Os01g12440	Os01g0224100	LOC_Os01g12440.1	ethylene-responsive transcription factor CRF2 [Oryza sativa Japonica Group] &gt;BAD81316.1 Pti6 -like [Oryza sativa Japonica Group] &gt;BAD81461.1 Pti6 -like [Oryza sativa Japonica Group] &gt;BAF04364.1 Os01g0224100 [Oryza sativa Japonica Group] &gt;BAG94891.1 unnamed protein product [Oryza sativa Japonica Group] &gt;BAG97749.1 unnamed protein product [Oryza sativa Japonica Group]
ERF	0	0	3.62615	4.12288	LOC4331013	LOC_Os02g55380	Os02g0797100	LOC_Os02g55380.1	ethylene-responsive transcription factor ERF003 [Oryza sativa Japonica Group] &gt;XP_052144502.1 ethylene-responsive transcription factor ERF003 [Oryza glaberrima] &gt;EAY87866.1 hypothetical protein OsI_09287 [Oryza sativa Indica Group] &gt;KAB8089326.1 hypothetical protein EE612_014237 [Oryza sativa] &gt;EAZ24945.1 hypothetical protein OsJ_08726 [Oryza sativa Japonica Group] &gt;KAF2947415.1 hy…
ERF	0	0	1.14083	1.0662	LOC4331845	LOC_Os03g08470	Os03g0183000	LOC_Os03g08470.1;LOC_Os03g08470.2;LOC_Os03g08470.3	ethylene-responsive transcription factor ERF073 [Oryza sativa Japonica Group] &gt;KAB8090512.1 hypothetical protein EE612_015700 [Oryza sativa] &gt;AAK92635.1 Putative AP2 domain containing protein [Oryza sativa Japonica Group] &gt;ABF94329.1 AP2 domain containing protein, expressed [Oryza sativa Japonica Group] &gt;ABF94330.1 AP2 domain containing protein, expressed [Oryza sativa Japonica Group]…
ERF	0	0	3.06573	3.02534	LOC4332331	LOC_Os03g15660	Os03g0263000	LOC_Os03g15660.1	ethylene-responsive transcription factor ERF013 [Oryza sativa Japonica Group] &gt;KAB8091185.1 hypothetical protein EE612_016632 [Oryza sativa] &gt;AAP06854.1 hypothetical protein [Oryza sativa Japonica Group] &gt;ABF95106.1 AP2 domain containing protein, expressed [Oryza sativa Japonica Group] &gt;EAZ26346.1 hypothetical protein OsJ_10227 [Oryza sativa Japonica Group] &gt;KAF2938448.1 hypothetic…
ERF	0	0	2.62509	2.55687	LOC4338539	LOC_Os05g29810	Os05g0361700	LOC_Os05g29810.1	ethylene-responsive transcription factor ERF071 [Oryza sativa Japonica Group] &gt;AAT38098.1 unknown protein [Oryza sativa Japonica Group] &gt;AAV31394.1 unknown protein [Oryza sativa Japonica Group] &gt;BAF17225.1 Os05g0361700 [Oryza sativa Japonica Group] &gt;BAG94483.1 unnamed protein product [Oryza sativa Japonica Group] &gt;BAS93611.1 Os05g0361700 [Oryza sativa Japonica Group]
ERF	0	0	3.10267	3.07735	LOC4340313	LOC_Os06g08340	Os06g0181700	LOC_Os06g08340.1	ethylene-responsive transcription factor ERF003 [Oryza sativa Japonica Group] &gt;XP_052160201.1 ethylene-responsive transcription factor ERF003-like [Oryza glaberrima] &gt;BAD72573.1 putative ethylene response factor 1 [Oryza sativa Japonica Group]
ERF	0	0	-1.11178	-1.03678	LOC4330752	LOC_Os02g51670	Os02g0752800	LOC_Os02g51670.1	ethylene-responsive transcription factor RAP2-4 [Oryza sativa Japonica Group] &gt;KAB8088950.1 hypothetical protein EE612_013735 [Oryza sativa] &gt;KAF2947003.1 hypothetical protein DAI22_02g336800 [Oryza sativa Japonica Group] &gt;BAD15561.1 putative dehydration-responsive element binding protein 3 [Oryza sativa Japonica Group] &gt;BAF10056.1 Os02g0752800 [Oryza sativa Japonica Group] &gt;BAG974…
ERF	0	0	-2.40127	-1.45296	LOC4327006	LOC_Os01g54890	Os01g0752500	LOC_Os01g54890.1	pathogenesis-related genes transcriptional activator PTI5 [Oryza sativa Japonica Group] &gt;KAB8083540.1 hypothetical protein EE612_005771 [Oryza sativa] &gt;KAF2952303.1 hypothetical protein DAI22_01g327400 [Oryza sativa Japonica Group] &gt;BAD87106.1 putative ethylene responsive protein [Oryza sativa Japonica Group] &gt;BAD87181.1 putative ethylene responsive protein [Oryza sativa Japonica Grou…
ERF	0	0	-1.56976	-1.43493	LOC9271519	LOC_Os02g29550	Os02g0499000	LOC_Os02g29550.1;LOC_Os02g29550.2;LOC_Os02g29550.3	ethylene-responsive transcription factor-like protein At4g13040 [Oryza sativa Japonica Group] &gt;XP_015626906.1 ethylene-responsive transcription factor-like protein At4g13040 [Oryza sativa Japonica Group] &gt;XP_052142547.1 ethylene-responsive transcription factor-like protein At4g13040 [Oryza glaberrima] &gt;XP_052142548.1 ethylene-responsive transcription factor-like protein At4g13040 [Oryza …	ERF
ERF	0	0	-1.46054	-1.08446	LOC4346686	LOC_Os09g13940	Os09g0309700	LOC_Os09g13940.1;LOC_Os09g13940.2;LOC_Os09g13940.3;LOC_Os09g13940.4	ethylene-responsive transcription factor ERF117 [Oryza sativa Japonica Group] &gt;XP_015651274.1 ethylene-responsive transcription factor ERF117 [Oryza sativa Japonica Group] &gt;XP_015651275.1 ethylene-responsive transcription factor ERF117 [Oryza sativa Japonica Group] &gt;XP_015651276.1 ethylene-responsive transcription factor ERF117 [Oryza sativa Japonica Group] &gt;BAF24749.1 Os09g0309700 [O…
ERF	0	0	0	-4.63633	LOC4330191	LOC_Os02g43820	Os02g0655200	LOC_Os02g43820.1	ethylene-responsive transcription factor 5 [Oryza sativa Japonica Group] &gt;KAB8088226.1 hypothetical protein EE612_012761 [Oryza sativa] &gt;KAF2946160.1 hypothetical protein DAI22_02g272800 [Oryza sativa Japonica Group] &gt;BAD25325.1 putative ethylene responsive element binding factor 5 [Oryza sativa Japonica Group] &gt;BAD25666.1 putative ethylene responsive element binding factor 5 [Oryza s…
ERF	0	0	-1.22912	0	LOC4339208	LOC_Os05g41760	Os05g0497200	LOC_Os05g41760.1	ethylene-responsive transcription factor 12 [Oryza sativa Japonica Group] &gt;EAY98555.1 hypothetical protein OsI_20468 [Oryza sativa Indica Group] &gt;KAB8100037.1 hypothetical protein EE612_030390 [Oryza sativa] &gt;AAT07582.1 unknown protein [Oryza sativa Japonica Group] &gt;EEE64227.1 hypothetical protein OsJ_19060 [Oryza sativa Japonica Group] &gt;KAF2931455.1 hypothetical protein DAI22_05g1…
ERF	0	0	-1.05677	0	LOC4342759	LOC_Os07g12510	Os07g0227600	LOC_Os07g12510.1	NA
ERF	0	0	1.7514	0	LOC4331843	LOC_Os03g08460	Os03g0182800	LOC_Os03g08460.1	ethylene-responsive transcription factor RAP2-12 [Oryza sativa Japonica Group] &gt;KAB8090511.1 hypothetical protein EE612_015699 [Oryza sativa] &gt;AAP92744.1 ap2 domain containing protein [Oryza sativa Japonica Group] &gt;ABF94328.1 AP2 domain containing protein, expressed [Oryza sativa Japonica Group] &gt;KAF2937634.1 hypothetical protein DAI22_03g064200 [Oryza sativa Japonica Group] &gt;BAF11…
ERF	0	0	3.41786	0	LOC4341722	LOC_Os06g44750	Os06g0657500	LOC_Os06g44750.1	AP2-like ethylene-responsive transcription factor AIL5 [Oryza sativa Japonica Group] &gt;KAF2927896.1 hypothetical protein DAI22_06g238900 [Oryza sativa Japonica Group] &gt;BAD37823.1 aintegumenta-like protein [Oryza sativa Japonica Group] &gt;BAF20170.1 Os06g0657500 [Oryza sativa Japonica Group] &gt;BAS98952.1 Os06g0657500 [Oryza sativa Japonica Group]
ERF	4.06182	3.60433	2.93098	0	LOC4339974	LOC_Os06g03670	Os06g0127100	LOC_Os06g03670.1	dehydration-responsive element-binding protein 1C [Oryza sativa Japonica Group] &gt;A2Y8S6.1 RecName: Full=Dehydration-responsive element-binding protein 1C; Short=Protein DREB1C; AltName: Full=Protein C-repeat-binding factor 1 [Oryza sativa Indica Group] &gt;Q9LWV3.1 RecName: Full=Dehydration-responsive element-binding protein 1C; Short=Protein DREB1C; AltName: Full=Protein C-repeat-binding fact…
ERF	4.48605	3.60537	3.2548	0	LOC4330306	LOC_Os02g45450	Os02g0677300	LOC_Os02g45450.1	dehydration-responsive element-binding protein 1G [Oryza sativa Japonica Group] &gt;Q6EP77.1 RecName: Full=Dehydration-responsive element-binding protein 1G; Short=Protein DREB1G [Oryza sativa Japonica Group] &gt;KAB8088403.1 hypothetical protein EE612_012995 [Oryza sativa] &gt;EAZ24170.1 hypothetical protein OsJ_07915 [Oryza sativa Japonica Group] &gt;KAF2946341.1 hypothetical protein DAI22_02g2…
ERF	8.40124	6.42571	7.08735	0	LOC107278604	LOC_Os02g54050	Os02g0781300	LOC_Os02g54050.1	ethylene-responsive transcription factor ERF018 [Oryza sativa Japonica Group] &gt;KAB8089185.1 hypothetical protein EE612_014055 [Oryza sativa] &gt;KAF2947262.1 hypothetical protein DAI22_02g356900 [Oryza sativa Japonica Group] &gt;BAS81220.1 Os02g0781300 [Oryza sativa Japonica Group]
ERF	3.85444	3.61159	2.54712	0	LOC4336721	LOC_Os04g48350	Os04g0572400	LOC_Os04g48350.1	dehydration-responsive element-binding protein 1E [Oryza sativa Japonica Group] &gt;XP_052153133.1 dehydration-responsive element-binding protein 1E [Oryza glaberrima] &gt;A2XWL6.1 RecName: Full=Dehydration-responsive element-binding protein 1E; Short=Protein DREB1E [Oryza sativa Indica Group] &gt;Q8H273.1 RecName: Full=Dehydration-responsive element-binding protein 1E; Short=Protein DREB1E [Oryz…
ERF	1.53303	1.84425	0	1.20796	LOC4331848	LOC_Os03g08500	Os03g0183300	LOC_Os03g08500.1;LOC_Os03g08500.2	ethylene-responsive transcription factor ERF073 [Oryza sativa Japonica Group] &gt;AAV98703.1 BTH-induced ERF transcriptional factor 4 [Oryza sativa Indica Group] &gt;AAK92632.1 Putative EREBP-like protein [Oryza sativa Japonica Group] &gt;ABF94333.1 AP2 domain containing protein, expressed [Oryza sativa Japonica Group] &gt;ACJ74069.1 AP2/ERF domain protein [Oryza sativa Japonica Group] &gt;ADR669…
ERF	9.91368	6.43943	0	0	LOC4323832	LOC_Os01g73770	Os01g0968800	LOC_Os01g73770.1	NA
ERF	1.46513	1.28369	0	0	LOC4339209	LOC_Os05g41780	Os05g0497300	LOC_Os05g41780.1	ethylene-responsive transcription factor 4 [Oryza sativa Japonica Group] &gt;XP_052157498.1 ethylene-responsive transcription factor 4-like [Oryza glaberrima] &gt;AAT10384.1 ethylene-responsive element binding factor [Oryza sativa] &gt;EAY98556.1 hypothetical protein OsI_20469 [Oryza sativa Indica Group] &gt;AAT07584.1 putative ethylene-responsive element binding factor [Oryza sativa Japonica Gro…
ERF	1.12762	1.15075	0	0	LOC4346629	LOC_Os09g11480	Os09g0287000	LOC_Os09g11480.1;LOC_Os09g11480.2	ethylene-responsive transcription factor 1-like [Oryza sativa Japonica Group] &gt;KAB8109959.1 hypothetical protein EE612_046607 [Oryza sativa] &gt;ACJ74072.1 AP2/ERF domain protein [Oryza sativa Japonica Group] &gt;EAZ44075.1 hypothetical protein OsJ_28694 [Oryza sativa Japonica Group] &gt;KAF2915475.1 hypothetical protein DAI22_09g036766 [Oryza sativa Japonica Group] &gt;BAD29170.1 ethylene res…
ERF	3.26749	0	1.5196	0	LOC4325050	LOC_Os01g64790	Os01g0868000	LOC_Os01g64790.1	ethylene-responsive transcription factor ABR1 [Oryza sativa Japonica Group] &gt;KAF2953508.1 hypothetical protein DAI22_01g412900 [Oryza sativa Japonica Group]
ERF	7.40767	0	5.5293	0	LOC4349881	LOC_Os11g06770	Os11g0168500	LOC_Os11g06770.1;LOC_Os11g06770.2	ethylene-responsive transcription factor ERF110 [Oryza sativa Japonica Group] &gt;AAX93016.1 AP2 domain, putative [Oryza sativa Japonica Group] &gt;AAX96475.1 unknown protein; contains similarity to AP2 domain transcription factor gene_id:MPF21.9 [Oryza sativa Japonica Group] &gt;ABA91589.1 AP2 domain containing protein, expressed [Oryza sativa Japonica Group] &gt;KAF2909699.1 hypothetical protei…
ERF	2.87575	0	2.81687	0	LOC9270349	LOC_Os02g45420	Os02g0676800	LOC_Os02g45420.1	ethylene-responsive transcription factor ERF027 [Oryza sativa Japonica Group] &gt;KAB8088402.1 hypothetical protein EE612_012989 [Oryza sativa] &gt;BAD29233.1 putative DRE binding factor 2 [Oryza sativa Japonica Group] &gt;BAD29539.1 putative DRE binding factor 2 [Oryza sativa Japonica Group] &gt;BAH01466.1 unnamed protein product [Oryza sativa Japonica Group] &gt;BAH91841.1 Os02g0676800 [Oryza s…
ERF	2.31618	0	0	0	LOC4330829	LOC_Os02g52670	Os02g0764700	LOC_Os02g52670.1	ethylene-responsive transcription factor ERF109 [Oryza sativa Japonica Group] &gt;KAB8089042.1 hypothetical protein EE612_013856 [Oryza sativa] &gt;EAZ24725.1 hypothetical protein OsJ_08495 [Oryza sativa Japonica Group] &gt;KAF2947110.1 hypothetical protein DAI22_02g344700 [Oryza sativa Japonica Group] &gt;BAD17116.1 AP2 domain-containing transcription factor-like [Oryza sativa Japonica Group] &g…
ERF	0	1.62985	0	0	LOC4336947	LOC_Os04g52090	Os04g0610400	LOC_Os04g52090.1	ethylene-responsive transcription factor 11 [Oryza sativa Japonica Group] &gt;KAB8096875.1 hypothetical protein EE612_025471 [Oryza sativa] &gt;KAF2935783.1 hypothetical protein DAI22_04g256600 [Oryza sativa Japonica Group] &gt;CAE03565.2 OSJNBa0085I10.10 [Oryza sativa Japonica Group] &gt;BAF15743.1 Os04g0610400 [Oryza sativa Japonica Group] &gt;BAS90945.1 Os04g0610400 [Oryza sativa Japonica Grou…
WRKY	4.49735	3.75789	2.91518	2.2634	LOC9268836	LOC_Os01g60600	Os01g0821300	LOC_Os01g60600.1	probable WRKY transcription factor 4 [Oryza sativa Japonica Group] &gt;KAF2953040.1 hypothetical protein DAI22_01g380700 [Oryza sativa Japonica Group] &gt;BAB85299.1 WRKY transcription factor 64-like protein [Oryza sativa Japonica Group] &gt;BAB86480.1 WRKY transcription factor 64-like protein [Oryza sativa Japonica Group] &gt;BAH91359.1 Os01g0821300 [Oryza sativa Japonica Group]
WRKY	3.86652	3.38953	2.23359	1.50837	LOC4328512	LOC_Os02g08440	Os02g0181300	LOC_Os02g08440.1;LOC_Os02g08440.2;LOC_Os02g08440.3;LOC_Os02g08440.4	NA
WRKY	0	0	1.17003	1.16912	LOC4330173	LOC_Os02g43560	Os02g0652100	LOC_Os02g43560.1	probable WRKY transcription factor 12 [Oryza sativa Japonica Group]
WRKY	0	0	1.29449	1.15737	LOC4336126	LOC_Os04g39570	Os04g0471700	LOC_Os04g39570.1;LOC_Os04g39570.2	probable WRKY transcription factor 2 isoform X2 [Oryza sativa Japonica Group] &gt;AAQ20902.1 WRKY2 [Oryza sativa Japonica Group] &gt;BAF14971.1 Os04g0471700 [Oryza sativa Japonica Group] &gt;BAS89651.1 Os04g0471700 [Oryza sativa Japonica Group]
WRKY	0	0	1.88582	2.0952	LOC4344296	LOC_Os07g48260	Os07g0680400	LOC_Os07g48260.1	probable WRKY transcription factor 70 [Oryza sativa Japonica Group] &gt;XP_015646873.1 probable WRKY transcription factor 70 [Oryza sativa Japonica Group] &gt;KAB8106877.1 hypothetical protein EE612_041396 [Oryza sativa] &gt;ADX60260.1 WRKY transcription factor, partial [Oryza sativa Japonica Group] &gt;KAF2924526.1 hypothetical protein DAI22_07g274800 [Oryza sativa Japonica Group] &gt;KAF2924529…
WRKY	0	0	-2.36044	-1.62913	LOC107276405	LOC_Os01g62514	Os01g0842801	LOC_Os01g62514.1	WRKY transcription factor WRKY28 [Oryza sativa Japonica Group] &gt;KAF2953261.1 hypothetical protein DAI22_01g396000 [Oryza sativa Japonica Group]
WRKY	0	0	-2.27009	-1.99497	LOC9270274	LOC_Os05g03900	Os05g0129800	LOC_Os05g03900.1;LOC_Os05g03900.2	probable WRKY transcription factor 69 [Oryza sativa Japonica Group] &gt;XP_052157367.1 probable WRKY transcription factor 69 [Oryza glaberrima] &gt;EEE62209.1 hypothetical protein OsJ_16996 [Oryza sativa Japonica Group] &gt;KAF2928974.1 hypothetical protein DAI22_05g022400 [Oryza sativa Japonica Group] &gt;KAF2928975.1 hypothetical protein DAI22_05g022400 [Oryza sativa Japonica Group]
WRKY	0	0	-2.50904	-1.68164	LOC107276141	LOC_Os05g04640	Os05g0137500	LOC_Os05g04640.1	NA
WRKY	0	0	-2.23451	-1.42398	LOC9272222	LOC_Os01g18584	Os01g0289600	LOC_Os01g18584.1	NA
WRKY	0	0	-1.75798	-1.36479	LOC4326856	LOC_Os01g47560	Os01g0665750	LOC_Os01g47560.1	uncharacterized protein LOC4326856 isoform X1 [Oryza sativa Japonica Group] &gt;BAF05711.1 Os01g0665500 [Oryza sativa Japonica Group]
WRKY	0	0	-1.63238	-1.23959	LOC107276380	LOC_Os06g05380	Os06g0146250	LOC_Os06g05380.1	probable WRKY transcription factor 72 isoform X1 [Oryza sativa Japonica Group] &gt;KAF2925171.1 hypothetical protein DAI22_06g032800 [Oryza sativa Japonica Group] &gt;KAF2925173.1 hypothetical protein DAI22_06g032800 [Oryza sativa Japonica Group]
WRKY	0	0	-2.2565	-2.03306	LOC107277882	LOC_Os08g09840	Os08g0198400	LOC_Os08g09840.1	zinc finger BED domain-containing protein RICESLEEPER 2-like isoform X1 [Oryza sativa Japonica Group] &gt;XP_015649909.1 zinc finger BED domain-containing protein RICESLEEPER 2-like isoform X1 [Oryza sativa Japonica Group] &gt;XP_015649910.1 zinc finger BED domain-containing protein RICESLEEPER 2-like isoform X1 [Oryza sativa Japonica Group] &gt;XP_015649911.1 zinc finger BED domain-containing pr…
WRKY	0	0	-1.02623	-1.10544	LOC4349610	LOC_Os11g02480	Os11g0116900	LOC_Os11g02480.1;LOC_Os11g02480.2	NA
WRKY	0	0	-1.58671	-1.21327	LOC4351243	LOC_Os12g01180	Os12g0102300	LOC_Os12g01180.1	NA
WRKY	0	0	0	1.61356	LOC107277067	LOC_Os05g40060	Os05g0478400	LOC_Os05g40060.1	probable WRKY transcription factor 70 [Oryza sativa Japonica Group] &gt;KAF2931286.1 hypothetical protein DAI22_05g206900 [Oryza sativa Japonica Group]
WRKY	0	0	-1.21793	0	LOC107277465	LOC_Os11g45920	Os11g0686250	LOC_Os11g45920.1	disease resistance protein RGA5-like isoform X1 [Oryza sativa Japonica Group]
WRKY	2.49111	2.28088	1.01316	0	LOC4338474	LOC_Os05g27730	Os05g0343400	LOC_Os05g27730.1
WRKY	5.56137	3.77812	3.64053	0	LOC4341678	LOC_Os06g44010	Os06g0649000	LOC_Os06g44010.1	WRKY transcription factor WRKY28-like [Oryza sativa Japonica Group]	WRKY
WRKY	1.61415	0	1.47114	0	LOC4339665	LOC_Os05g49620	Os05g0571200	LOC_Os05g49620.1	probable WRKY transcription factor 41 [Oryza sativa Japonica Group] &gt;Q0DFT7.1 RecName: Full=Transcription factor WRKY19; Short=OsWRKY19; AltName: Full=WRKY transcription factor 19 [Oryza sativa Japonica Group] &gt;ADX60272.1 bHLH transcription factor, partial [Oryza sativa Japonica Group] &gt;EEE64756.1 hypothetical protein OsJ_19612 [Oryza sativa Japonica Group] &gt;KAF2932202.1 hypothetical …
WRKY	1.54048	1.7713	0	0	LOC4346768	LOC_Os09g16510	Os09g0334500	LOC_Os09g16510.1	probable WRKY transcription factor 30 [Oryza sativa Japonica Group] &gt;AAT84161.1 transcription factor WRKY74 [Oryza sativa Indica Group] &gt;KAB8110132.1 hypothetical protein EE612_047066 [Oryza sativa] &gt;EAZ44315.1 hypothetical protein OsJ_28937 [Oryza sativa Japonica Group] &gt;KAF2915707.1 hypothetical protein DAI22_09g059400 [Oryza sativa Japonica Group] &gt;BAD28444.1 WRKY family transcr…
WRKY	2.02364	2.16633	0	0	LOC4347069	LOC_Os09g25060	Os09g0417600	LOC_Os09g25060.1	WRKY transcription factor WRKY76 [Oryza sativa Japonica Group] &gt;Q6EPZ2.1 RecName: Full=WRKY transcription factor WRKY76; Short=OsWRKY76 [Oryza sativa Japonica Group] &gt;EAZ44747.1 hypothetical protein OsJ_29378 [Oryza sativa Japonica Group] &gt;BAD29278.1 putative WIZZ [Oryza sativa Japonica Group] &gt;BAF25098.1 Os09g0417600 [Oryza sativa Japonica Group] &gt;BAG87246.1 unnamed protein produc…
WRKY	1.48433	1.60662	0	0	LOC4326760	LOC_Os01g14440	Os01g0246700	LOC_Os01g14440.1	NA
WRKY	2.36986	2.20573	0	0	LOC4327611	LOC_Os01g60640	Os01g0821600	LOC_Os01g60640.1	probable WRKY transcription factor 30 [Oryza sativa Japonica Group] &gt;KAB8084069.1 hypothetical protein EE612_006524 [Oryza sativa] &gt;KAF2953042.1 hypothetical protein DAI22_01g381100 [Oryza sativa Japonica Group] &gt;BAB85303.1 WRKY transcription factor 48-like protein [Oryza sativa Japonica Group] &gt;BAB86484.1 WRKY transcription factor 48-like protein [Oryza sativa Japonica Group] &gt;BAF…
WRKY	2.75385	2.63681	0	0	LOC4327518	LOC_Os01g61080	Os01g0826400	LOC_Os01g61080.1	NA
WRKY	1.24278	1.42095	0	0	LOC4337998	LOC_Os05g09020	Os05g0183100	LOC_Os05g09020.1;LOC_Os05g09020.2	NA
WRKY	2.4298	2.14469	0	0	LOC4338413	LOC_Os05g25770	Os05g0322900	LOC_Os05g25770.1	probable WRKY transcription factor 70 [Oryza sativa Japonica Group] &gt;Q5W6D6.1 RecName: Full=Transcription factor WRKY45-1; Short=OsWRKY45-1; AltName: Full=OsWRKY45; AltName: Full=WRKY transcription factor 45-2 [Oryza sativa Japonica Group] &gt;AAV44133.1 putative WRKY transcription factor [Oryza sativa Japonica Group] &gt;AAV44172.1 putative WRKY transcription factor [Oryza sativa Japonica Gro…
WRKY	2.83906	2.20867	0	0	LOC4339451	LOC_Os05g46020	Os05g0537100	LOC_Os05g46020.1	probable WRKY transcription factor 50 [Oryza sativa Japonica Group] &gt;ABC02807.1 WRKY transcription factor 7 [Oryza sativa] &gt;AAT39221.1 unknown protein, contains WRKY DNA -binding domain [Oryza sativa Japonica Group] &gt;EEE64508.1 hypothetical protein OsJ_19359 [Oryza sativa Japonica Group] &gt;KAB8100367.1 hypothetical protein EE612_030876 [Oryza sativa] &gt;KAF2931846.1 hypothetical prote…
WRKY	0	2.21155	0	0	LOC4345456	LOC_Os08g29660	Os08g0386200	LOC_Os08g29660.1	probable WRKY transcription factor 54 [Oryza sativa Japonica Group] &gt;AAT84162.1 transcription factor WRKY69 [Oryza sativa Indica Group] &gt;KAB8108368.1 hypothetical protein EE612_043986 [Oryza sativa] &gt;ADX60247.1 WRKY transcription factor, partial [Oryza sativa Japonica Group] &gt;EAZ42593.1 hypothetical protein OsJ_27157 [Oryza sativa Japonica Group] &gt;KAF2919508.1 hypothetical protein …
WRKY	0	1.3719	0	0	LOC4325658	LOC_Os01g09100	Os01g0186000	LOC_Os01g09100.1	probable WRKY transcription factor 50 [Oryza sativa Japonica Group] &gt;AAQ20913.1 WRKY13 [Oryza sativa Japonica Group] &gt;ADX60238.1 WRKY transcription factor, partial [Oryza sativa Japonica Group] &gt;EAZ10835.1 hypothetical protein OsJ_00671 [Oryza sativa Japonica Group] &gt;KAF2948815.1 hypothetical protein DAI22_01g062400 [Oryza sativa Japonica Group] &gt;BAF04157.1 Os01g0186000 [Oryza sati…
bZIP	-1.43402	-1.45709	-1.35926	-1.38849	LOC107277499	LOC_Os03g20650	Os03g0322700	LOC_Os03g20650.1	ABSCISIC ACID-INSENSITIVE 5-like protein 2 [Oryza sativa Japonica Group] &gt;XP_052149537.1 ABSCISIC ACID-INSENSITIVE 5-like protein 2 [Oryza glaberrima] &gt;KAF2939013.1 hypothetical protein DAI22_03g160500 [Oryza sativa Japonica Group]
bZIP	0	1.79039	2.58366	2.42725	LOC4325139	LOC_Os01g55150	Os01g0756200	LOC_Os01g55150.1	basic leucine zipper 6 isoform X2 [Oryza sativa Japonica Group]
bZIP	0	1.52701	2.46227	1.99387	LOC4328871	LOC_Os02g14910	Os02g0247100	LOC_Os02g14910.1	NA
bZIP	0	0	-1.54159	-1.65855	LOC4326871	LOC_Os01g36220	Os01g0542700	LOC_Os01g36220.1	ocs element-binding factor 1 [Oryza sativa Japonica Group] &gt;KAF2950607.1 hypothetical protein DAI22_01g199800 [Oryza sativa Japonica Group] &gt;BAB89252.1 unknown protein [Oryza sativa Japonica Group] &gt;BAC10897.1 unknown protein [Oryza sativa Japonica Group] &gt;BAF05187.1 Os01g0542700 [Oryza sativa Japonica Group] &gt;BAG98976.1 unnamed protein product [Oryza sativa Japonica Group]	bZIP
bZIP	0	0	-1.73851	-1.46769	LOC107278258	LOC_Os01g58760	Os01g0801901	LOC_Os01g58760.1	basic leucine zipper 23 [Oryza sativa Japonica Group] &gt;XP_015618034.1 basic leucine zipper 23 [Oryza sativa Japonica Group] &gt;XP_052153223.1 basic leucine zipper 23-like [Oryza glaberrima] &gt;XP_052153230.1 basic leucine zipper 23-like [Oryza glaberrima] &gt;KAB8083920.1 hypothetical protein EE612_006319 [Oryza sativa] &gt;KAF2952842.1 hypothetical protein DAI22_01g366800 [Oryza sativa Japo…
bZIP	0	0	-1.44864	-1.23	LOC4328662	LOC_Os02g10860	Os02g0203000	LOC_Os02g10860.1	transcription factor HY5 [Oryza sativa Japonica Group] &gt;KAB8086364.1 hypothetical protein EE612_009594 [Oryza sativa] &gt;BAS77535.1 Os02g0203000 [Oryza sativa Japonica Group]
bZIP	0	0	-1.45844	-1.65824	LOC4346610	LOC_Os09g10840	Os09g0280500	LOC_Os09g10840.1;LOC_Os09g10840.2	transcription factor TGAL7 isoform X1 [Oryza sativa Japonica Group] &gt;EAZ44039.1 hypothetical protein OsJ_28661 [Oryza sativa Japonica Group] &gt;KAF2915431.1 hypothetical protein DAI22_09g033700 [Oryza sativa Japonica Group]
bZIP	0	0	1.78105	1.51613	LOC4325565	LOC_Os01g11350	Os01g0211800	LOC_Os01g11350.1	NA	bZIP
bZIP	0	0	1.2252	1.29216	LOC4329583	LOC_Os02g33560	Os02g0538900	LOC_Os02g33560.1	basic leucine zipper 34 [Oryza sativa Japonica Group] &gt;AEP20528.1 b-zip protein [Oryza sativa Japonica Group] &gt;KAF2945174.1 hypothetical protein DAI22_02g198400 [Oryza sativa Japonica Group] &gt;BAD27924.1 bZIP protein-like [Oryza sativa Japonica Group] &gt;BAD28835.1 bZIP protein-like [Oryza sativa Japonica Group] &gt;BAF08969.1 Os02g0538900 [Oryza sativa Japonica Group]
bZIP	0	0	1.66807	1.42466	LOC4332761	LOC_Os03g21800	Os03g0336200	LOC_Os03g21800.1;LOC_Os03g21800.2	NA
bZIP	0	0	2.57687	2.345	LOC4336273	LOC_Os04g41820	Os04g0495500	LOC_Os04g41820.1	transcription factor RF2a-like [Oryza sativa Japonica Group] &gt;EAZ31218.1 hypothetical protein OsJ_15316 [Oryza sativa Japonica Group] &gt;CAD41260.1 OSJNBa0067K08.2 [Oryza sativa Japonica Group]
bZIP	0	0	1.70683	1.5625	LOC4340708	LOC_Os06g15480	Os06g0265400	LOC_Os06g15480.1;LOC_Os06g15480.2	transcription factor TGAL3-like isoform X3 [Oryza sativa Japonica Group]
bZIP	0	0	1.69217	1.55264	LOC4344292	LOC_Os07g48180	Os07g0679500	LOC_Os07g48180.1	transcription factor RF2b-like [Oryza sativa Japonica Group]	bZIP
bZIP	0	0	1.13886	1.0786	LOC4346208	LOC_Os08g43090	Os08g0543900	LOC_Os08g43090.1	transcription factor VIP1 [Oryza sativa Japonica Group] &gt;KAB8109434.1 hypothetical protein EE612_045703 [Oryza sativa] &gt;KAF2920767.1 hypothetical protein DAI22_08g236400 [Oryza sativa Japonica Group] &gt;BAF24317.2 Os08g0543900 [Oryza sativa Japonica Group] &gt;BAT06521.1 Os08g0543900 [Oryza sativa Japonica Group]
bZIP	0	0	0	-1.10985	LOC4341753	LOC_Os06g45140	Os06g0662200	LOC_Os06g45140.1;LOC_Os06g45140.2;LOC_Os06g45140.3	bZIP transcription factor RISBZ5 [Oryza sativa Japonica Group] &gt;Q654B3.1 RecName: Full=bZIP transcription factor RISBZ5; AltName: Full=Rice seed bZIP5; AltName: Full=bZIP transcription factor 52; Short=OsbZIP52 [Oryza sativa Japonica Group] &gt;EEC81125.1 hypothetical protein OsI_24006 [Oryza sativa Indica Group] &gt;KAB8103416.1 hypothetical protein EE612_035852 [Oryza sativa] &gt;EEE66169.1 …	bZIP
bZIP	0	0	0	-1.14143	LOC9266154	LOC_Os06g50600	Os06g0720900	LOC_Os06g50600.1;LOC_Os06g50600.2	ABSCISIC ACID-INSENSITIVE 5-like protein 2 isoform X1 [Oryza sativa Japonica Group] &gt;XP_015643092.1 ABSCISIC ACID-INSENSITIVE 5-like protein 2 isoform X1 [Oryza sativa Japonica Group] &gt;XP_015643093.1 ABSCISIC ACID-INSENSITIVE 5-like protein 2 isoform X1 [Oryza sativa Japonica Group] &gt;XP_015643094.1 ABSCISIC ACID-INSENSITIVE 5-like protein 2 isoform X1 [Oryza sativa Japonica Group] &gt;XP…	bZIP
bZIP	0	0	0	-1.87581	LOC4347436	LOC_Os09g31390	Os09g0489500	LOC_Os09g31390.1;LOC_Os09g31390.2;LOC_Os09g31390.3	transcription factor TGA2 isoform X1 [Oryza sativa Japonica Group] &gt;KAB8111095.1 hypothetical protein EE612_048646 [Oryza sativa] &gt;EEE69952.1 hypothetical protein OsJ_29832 [Oryza sativa Japonica Group] &gt;KAF2916800.1 hypothetical protein DAI22_09g146700 [Oryza sativa Japonica Group] &gt;BAG95936.1 unnamed protein product [Oryza sativa Japonica Group] &gt;BAT08721.1 Os09g0489500 [Oryza sa…
bZIP	0	0	-1.01055	0	LOC9270267	LOC_Os04g54474	Os04g0637000	LOC_Os04g54474.1;LOC_Os04g54474.2;LOC_Os04g54474.3	transcription factor TGAL6 isoform X1 [Oryza sativa Japonica Group] &gt;XP_015636711.1 transcription factor TGAL6 isoform X1 [Oryza sativa Japonica Group] &gt;XP_015636712.1 transcription factor TGAL6 isoform X1 [Oryza sativa Japonica Group] &gt;XP_025880677.1 transcription factor TGAL6 isoform X1 [Oryza sativa Japonica Group] &gt;XP_052152900.1 transcription factor TGAL6 isoform X1 [Oryza glaber…
bZIP	0	0	-1.69307	0	LOC4341530	LOC_Os06g41100	Os06g0614100	LOC_Os06g41100.1	transcription factor TGAL8 isoform X1 [Oryza sativa Japonica Group]	bZIP
bZIP	0	0	-2.39549	0	LOC4345889	LOC_Os08g38020	Os08g0487100	LOC_Os08g38020.1	NA
bZIP	0	0	-1.08808	0	LOC4347257	LOC_Os09g28310	Os09g0456200	LOC_Os09g28310.1	bZIP transcription factor TRAB1-like [Oryza sativa Japonica Group] &gt;KAF2916521.1 hypothetical protein DAI22_09g125500 [Oryza sativa Japonica Group] &gt;BAD38293.1 putative bZIP transcription factor ABI5 [Oryza sativa Japonica Group] &gt;BAD38466.1 putative bZIP transcription factor ABI5 [Oryza sativa Japonica Group] &gt;BAF25276.1 Os09g0456200 [Oryza sativa Japonica Group] &gt;BAG89716.1 unnam…
bZIP	0	0	-1.80619	0	LOC4347354	LOC_Os09g29820	Os09g0474000	LOC_Os09g29820.1	basic leucine zipper 8 [Oryza sativa Japonica Group] &gt;KAB8110974.1 hypothetical protein EE612_048481 [Oryza sativa] &gt;EEE58832.1 hypothetical protein OsJ_10404 [Oryza sativa Japonica Group] &gt;KAF2916660.1 hypothetical protein DAI22_09g136000 [Oryza sativa Japonica Group] &gt;BAD34342.1 unknown protein [Oryza sativa Japonica Group] &gt;BAF25368.1 Os09g0474000 [Oryza sativa Japonica Group]
bZIP	0	0	1.04703	0	LOC107275625	LOC_Os02g49560	Os02g0728001	LOC_Os02g49560.1	basic leucine zipper 43 [Oryza sativa Japonica Group] &gt;XP_052142673.1 basic leucine zipper 43-like [Oryza glaberrima] &gt;EAY87376.1 hypothetical protein OsI_08779 [Oryza sativa Indica Group] &gt;KAB8088724.1 hypothetical protein EE612_013428 [Oryza sativa] &gt;EAZ24479.1 hypothetical protein OsJ_08237 [Oryza sativa Japonica Group] &gt;KAF2946750.1 hypothetical protein DAI22_02g318400 [Oryza s…
bZIP	0	0	1.17098	0	LOC4331479	LOC_Os03g03550	Os03g0127500	LOC_Os03g03550.1	transcription factor RF2b-like [Oryza sativa Japonica Group] &gt;KAB8090003.1 hypothetical protein EE612_015057 [Oryza sativa] &gt;AAM19114.1 Putative bZIP transcription factor [Oryza sativa Japonica Group] &gt;ABF93766.1 bZIP family transcription factor, putative, expressed [Oryza sativa Japonica Group] &gt;KAF2937067.1 hypothetical protein DAI22_03g023100 [Oryza sativa Japonica Group] &gt;BAF10…
bZIP	0	0	5.84571	0	LOC107276263	LOC_Os05g41280	Os05g0492000	LOC_Os05g41280.1	transcription factor TGAL1-like isoform X2 [Oryza sativa Japonica Group]
bZIP	0	0	1.01418	0	LOC4339653	LOC_Os05g49420	Os05g0569300	LOC_Os05g49420.1	common plant regulatory factor 1 [Oryza sativa Japonica Group] &gt;AAT93931.1 putative bZIP protein [Oryza sativa Japonica Group] &gt;AAU10677.1 putative G-box binding factor [Oryza sativa Japonica Group] &gt;KAF2932181.1 hypothetical protein DAI22_05g268200 [Oryza sativa Japonica Group] &gt;BAF18276.1 Os05g0569300 [Oryza sativa Japonica Group] &gt;BAS95406.1 Os05g0569300 [Oryza sativa Japonica G…
bZIP	0	0	1.0644	0	LOC4344334	LOC_Os07g48660	Os07g0686100	LOC_Os07g48660.1	ABSCISIC ACID-INSENSITIVE 5-like protein 5 [Oryza sativa Japonica Group] &gt;KAF2924585.1 hypothetical protein DAI22_07g278300 [Oryza sativa Japonica Group] &gt;BAF22595.1 Os07g0686100 [Oryza sativa Japonica Group] &gt;BAG99081.1 unnamed protein product [Oryza sativa Japonica Group] &gt;BAT03287.1 Os07g0686100 [Oryza sativa Japonica Group]
bZIP	0	0	1.4399	0	LOC4349212	LOC_Os10g38820	Os10g0531900	LOC_Os10g38820.1	NA
bZIP	0	0	1.0084	0	LOC4351714	LOC_Os12g09250	Os12g0194600	LOC_Os12g09250.1	uncharacterized protein At4g06598 [Oryza sativa Japonica Group] &gt;XP_025877630.1 uncharacterized protein At4g06598 [Oryza sativa Japonica Group] &gt;KAB8116882.1 hypothetical protein EE612_058249 [Oryza sativa] &gt;KAF2907007.1 hypothetical protein DAI22_12g063600 [Oryza sativa Japonica Group] &gt;KAF2907008.1 hypothetical protein DAI22_12g063600 [Oryza sativa Japonica Group] &gt;KAF2907009.1 h…
NAC	2.48097	2.38839	1.72203	1.80415	LOC4327485	LOC_Os01g60020	Os01g0816100	LOC_Os01g60020.1	NA
NAC	4.02428	3.93016	3.09387	2.83496	LOC4334553	LOC_Os03g60080	Os03g0815100	LOC_Os03g60080.1	NA
NAC	2.40349	2.0818	1.01718	1.03745	LOC4342753	LOC_Os07g12340	Os07g0225300	LOC_Os07g12340.1	NAC domain-containing protein 67 [Oryza sativa Japonica Group] &gt;XP_052160972.1 NAC domain-containing protein 67 [Oryza glaberrima] &gt;Q7EZT1.1 RecName: Full=NAC domain-containing protein 67; Short=ONAC067; AltName: Full=OsNAC3 [Oryza sativa Japonica Group] &gt;KAB8104814.1 hypothetical protein EE612_037977 [Oryza sativa] &gt;KAF2922014.1 hypothetical protein DAI22_07g078500 [Oryza sativa Japo…
NAC	0	0	1.57019	1.34827	LOC4329852	LOC_Os02g38130	Os02g0594800	LOC_Os02g38130.1	NAC domain-containing protein 73 [Oryza sativa Japonica Group] &gt;KAB8087768.1 hypothetical protein EE612_012178 [Oryza sativa] &gt;KAF2945628.1 hypothetical protein DAI22_02g230400 [Oryza sativa Japonica Group] &gt;BAD16820.1 no apical meristem (NAM)-like protein [Oryza sativa Japonica Group] &gt;BAF09222.1 Os02g0594800 [Oryza sativa Japonica Group] &gt;BAH00731.1 unnamed protein product [Oryza…
NAC	-2.36098	0	-3.01429	-2.41888	LOC4331342	LOC_Os03g01870	Os03g0109000	LOC_Os03g01870.1	NAC transcription factor 32 [Oryza sativa Japonica Group] &gt;KAB8089820.1 hypothetical protein EE612_014837 [Oryza sativa] &gt;ABF93571.1 NAC-domain containing protein 21/22, putative, expressed [Oryza sativa Japonica Group] &gt;EAZ25307.1 hypothetical protein OsJ_09117 [Oryza sativa Japonica Group] &gt;KAF2936851.1 hypothetical protein DAI22_03g008700 [Oryza sativa Japonica Group] &gt;BAF10619.…
NAC	0	0	-1.468	-1.03577	LOC4327298	LOC_Os01g09550	Os01g0191300	LOC_Os01g09550.1;LOC_Os01g09550.2;LOC_Os01g09550.3;LOC_Os01g09550.4	NAC domain-containing protein 75 isoform X3 [Oryza sativa Japonica Group]
NAC	0	0	-1.331	-1.78688	LOC4332717	LOC_Os03g21060	Os03g0327800	LOC_Os03g21060.1	NAC transcription factor 47 [Oryza sativa Japonica Group] &gt;Q8H7M1.1 RecName: Full=NAC domain-containing protein 58; Short=ONAC058; AltName: Full=Protein NAC-LIKE, ACTIVATED BY AP3/PI homolog; Short=OsNAP; AltName: Full=Protein PREMATURELY SENILE 1 [Oryza sativa Japonica Group] &gt;AAN64999.1 Putative NAM (no apical meristem) protein [Oryza sativa Japonica Group] &gt;ABF95729.1 NAC domain trans…	NAC	-1.331
NAC	0	0	-1.18106	-1.01999	LOC4339834	LOC_Os06g01230	Os06g0101800	LOC_Os06g01230.1;LOC_Os06g01230.2	NAC domain-containing protein 7 [Oryza sativa Japonica Group] &gt;KAF2924719.1 hypothetical protein DAI22_06g000600 [Oryza sativa Japonica Group]
NAC	0	0	-1.58133	-1.84327	LOC4342116	LOC_Os06g51070	Os06g0726300	LOC_Os06g51070.1	NAC domain-containing protein 22-like [Oryza sativa Japonica Group] &gt;XP_052159274.1 NAC domain-containing protein 22-like [Oryza glaberrima] &gt;EAZ02417.1 hypothetical protein OsI_24519 [Oryza sativa Indica Group] &gt;KAB8103957.1 hypothetical protein EE612_036565 [Oryza sativa] &gt;EAZ38339.1 hypothetical protein OsJ_22714 [Oryza sativa Japonica Group] &gt;KAF2928578.1 hypothetical protein D…
NAC	0	0	-1.67542	-1.96019	LOC4344324	LOC_Os07g48550	Os07g0684800	LOC_Os07g48550.1	NAC domain-containing protein 87 [Oryza sativa Japonica Group] &gt;EAZ05179.1 hypothetical protein OsI_27374 [Oryza sativa Indica Group] &gt;KAB8106917.1 hypothetical protein EE612_041447 [Oryza sativa] &gt;AFK74447.1 NAC transcription factor 15 [Oryza sativa Japonica Group] &gt;KAB8106918.1 hypothetical protein EE612_041447 [Oryza sativa] &gt;KAF2924564.1 hypothetical protein DAI22_07g277200 [Or…
NAC	0	0	-1.62575	-2.31304	LOC4344902	LOC_Os08g10080	Os08g0200600	LOC_Os08g10080.1	NAC domain-containing protein 21/22 isoform X1 [Oryza sativa Japonica Group] &gt;KAB8107718.1 hypothetical protein EE612_042669 [Oryza sativa] &gt;KAF2918534.1 hypothetical protein DAI22_08g064300 [Oryza sativa Japonica Group] &gt;BAD03222.1 putative NAC domain protein NAC1 [Oryza sativa Japonica Group] &gt;BAD03589.1 putative NAC domain protein NAC1 [Oryza sativa Japonica Group] &gt;BAF23127.1 O…
NAC	0	0	-1.32081	-1.43269	LOC4346157	LOC_Os08g42400	Os08g0535800	LOC_Os08g42400.1;LOC_Os08g42400.2;LOC_Os08g42400.3	NA
NAC	0	0	-1.28004	-1.59968	LOC4347465	LOC_Os09g32260	Os09g0497900	LOC_Os09g32260.1;LOC_Os09g32260.2	NAC domain-containing protein 92 [Oryza sativa Japonica Group] &gt;XP_015612625.1 NAC domain-containing protein 92 [Oryza sativa Japonica Group] &gt;KAB8111159.1 hypothetical protein EE612_048727 [Oryza sativa] &gt;EAZ45243.1 hypothetical protein OsJ_29886 [Oryza sativa Japonica Group] &gt;KAF2916871.1 hypothetical protein DAI22_09g152000 [Oryza sativa Japonica Group] &gt;KAF2916872.1 hypothetica…
NAC	0	0	-1.17817	-1.29763	LOC4347530	LOC_Os09g33490	Os09g0509100	LOC_Os09g33490.1	NAC domain-containing protein 83 [Oryza sativa Japonica Group] &gt;EAZ45318.1 hypothetical protein OsJ_29961 [Oryza sativa Japonica Group] &gt;BAF25540.1 Os09g0509100 [Oryza sativa Japonica Group] &gt;BAG87473.1 unnamed protein product [Oryza sativa Japonica Group] &gt;BAT08890.1 Os09g0509100 [Oryza sativa Japonica Group]
NAC	0	0	1.14216	1.33916	LOC107276893	LOC_Os09g38000	Os09g0552800	LOC_Os09g38000.1	NAC domain-containing protein 86 [Oryza sativa Japonica Group] &gt;KAB8111640.1 hypothetical protein EE612_049377 [Oryza sativa] &gt;KAF2917430.1 hypothetical protein DAI22_09g191400 [Oryza sativa Japonica Group] &gt;BAT09320.1 Os09g0552800 [Oryza sativa Japonica Group]
NAC	0	0	0	-1.21905	LOC4334294	LOC_Os03g56580	Os03g0777000	LOC_Os03g56580.1	transcription factor JUNGBRUNNEN 1 [Oryza sativa Japonica Group] &gt;KAB8093808.1 hypothetical protein EE612_020768 [Oryza sativa] &gt;AAM19015.1 putative NAM (no apical meristem) protein [Oryza sativa Japonica Group] &gt;AAN65038.1 putative NAC domain protein [Oryza sativa Japonica Group] &gt;ABF99144.1 NAC-domain containing protein 9, putative, expressed [Oryza sativa Japonica Group] &gt;EAZ287…
NAC	0	0	0	-1.57134	LOC4336400	LOC_Os04g43560	Os04g0515900	LOC_Os04g43560.1	protein CUP-SHAPED COTYLEDON 1 [Oryza sativa Japonica Group] &gt;EAY94846.1 hypothetical protein OsI_16639 [Oryza sativa Indica Group] &gt;KAB8096097.1 hypothetical protein EE612_024405 [Oryza sativa] &gt;ATX63066.1 NAC transcription factor [Oryza sativa Japonica Group] &gt;KAF2934947.1 hypothetical protein DAI22_04g196500 [Oryza sativa Japonica Group] &gt;CAD41119.2 OSJNBb0070J16.15 [Oryza sativ…
NAC	0	0	0	-3.40689	LOC4349814	LOC_Os11g05614	Os11g0154500	LOC_Os11g05614.1	NAC domain-containing protein 90 [Oryza sativa Japonica Group] &gt;KAB8114277.1 hypothetical protein EE612_053570 [Oryza sativa] &gt;AAX92730.1 No apical meristem (NAM) protein, putative [Oryza sativa Japonica Group] &gt;ABA91525.1 NAC-domain containing protein 90, putative, expressed [Oryza sativa Japonica Group] &gt;EAZ17477.1 hypothetical protein OsJ_33009 [Oryza sativa Japonica Group] &gt;KAF…
NAC	0	0	0	-1.02073	LOC4352203	LOC_Os12g29330	Os12g0477400	LOC_Os12g29330.1	NAC domain-containing protein 83 [Oryza sativa Japonica Group] &gt;XP_052137919.1 NAC domain-containing protein 83 [Oryza glaberrima] &gt;ABA98227.1 No apical meristem protein, expressed [Oryza sativa Japonica Group] &gt;KAF2907786.1 hypothetical protein DAI22_12g126300 [Oryza sativa Japonica Group] &gt;BAF29776.1 Os12g0477400 [Oryza sativa Japonica Group] &gt;BAH01502.1 unnamed protein product […
NAC	0	0	0	1.68168	LOC4349213	LOC_Os10g38834	Os10g0532000	LOC_Os10g38834.1	NA
NAC	0	0	-1.22448	0	LOC4339612	LOC_Os05g48850	Os05g0563000	LOC_Os05g48850.1	NAC domain-containing protein 73 [Oryza sativa Japonica Group] &gt;XP_052155319.1 NAC domain-containing protein 73-like [Oryza glaberrima] &gt;AAT77390.1 unknown protein [Oryza sativa Japonica Group] &gt;EEE64692.1 hypothetical protein OsJ_19547 [Oryza sativa Japonica Group] &gt;KAF2932108.1 hypothetical protein DAI22_05g262900 [Oryza sativa Japonica Group] &gt;BAF18237.1 Os05g0563000 [Oryza sati…
NAC	0	0	-1.50858	0	LOC4340011	LOC_Os06g04090	Os06g0131700	LOC_Os06g04090.1	NAC domain-containing protein 43 [Oryza sativa Japonica Group] &gt;XP_052160731.1 NAC domain-containing protein 43-like [Oryza glaberrima] &gt;EAY99525.1 hypothetical protein OsI_21494 [Oryza sativa Indica Group] &gt;AAO33144.1 putative NAM (no apical meristem) protein [Oryza sativa Japonica Group] &gt;KAF2925009.1 hypothetical protein DAI22_06g020800 [Oryza sativa Japonica Group] &gt;BAA84803.1 …
NAC	0	0	-1.04865	0	LOC9268992	LOC_Os06g36480	Os06g0560300	LOC_Os06g36480.1	NAC domain-containing protein 75 isoform X1 [Oryza sativa Japonica Group]
NAC	0	0	1.70588	0	LOC4338800	LOC_Os05g34310	Os05g0415400	LOC_Os05g34310.1	NAC transcription factor 25 [Oryza sativa Japonica Group] &gt;AAT77373.1 unknown protein [Oryza sativa Japonica Group] &gt;AAV32133.1 unknown protein [Oryza sativa Japonica Group] &gt;EEE63736.1 hypothetical protein OsJ_18554 [Oryza sativa Japonica Group] &gt;KAF2930796.1 hypothetical protein DAI22_05g162200 [Oryza sativa Japonica Group] &gt;BAF17469.1 Os05g0415400 [Oryza sativa Japonica Group]
NAC	1.67545	1.49732	0	0	LOC4325006	LOC_Os01g66120	Os01g0884300	LOC_Os01g66120.1;LOC_Os01g66120.3	NAC domain-containing protein 48 [Oryza sativa Japonica Group] &gt;Q7F2L3.1 RecName: Full=NAC domain-containing protein 48; Short=ONAC048; AltName: Full=OsNAC6; AltName: Full=Protein STRESS-RESPONSIVE NAC 2 [Oryza sativa Japonica Group] &gt;KAB8084629.1 hypothetical protein EE612_007216 [Oryza sativa] &gt;AAK17067.1 NAC6 [Oryza sativa Japonica Group] &gt;ACJ54897.1 NAC6 protein [Oryza sativa Japo…
NAC	2.05758	1.73141	0	0	LOC4338832	LOC_Os05g34830	Os05g0421600	LOC_Os05g34830.1;LOC_Os05g34830.2;LOC_Os05g34830.3	NAC domain-containing protein 48-like [Oryza sativa Japonica Group] &gt;AAT44250.1 putative no apical meristem (NAM) protein [Oryza sativa Japonica Group] &gt;KAF2930844.1 hypothetical protein DAI22_05g165700 [Oryza sativa Japonica Group]
C2H2	0	0	-2.58652	-1.93148	LOC9270515	LOC_Os01g57020	Os01g0778100	LOC_Os01g57020.1	protein UPSTREAM OF FLC [Oryza sativa Japonica Group] &gt;XP_025877314.1 protein UPSTREAM OF FLC [Oryza sativa Japonica Group] &gt;KAF2952594.1 hypothetical protein DAI22_01g346700 [Oryza sativa Japonica Group]
C2H2	0	0	1.71682	1.55846	LOC4327046	LOC_Os01g57650	Os01g0785900	LOC_Os01g57650.1	NA
C2H2	0	0	-1.5638	-1.52445	LOC4324940	LOC_Os01g65080	Os01g0871200	LOC_Os01g65080.1;LOC_Os01g65080.2;LOC_Os01g65080.3;LOC_Os01g65080.4	NA
C2H2	0	0	-1.14634	-1.17259	LOC107277956	LOC_Os02g57790	Os02g0823900	LOC_Os02g57790.1	zinc finger protein ZAT5 [Oryza sativa Japonica Group] &gt;KAB8089593.1 hypothetical protein EE612_014563 [Oryza sativa] &gt;KAF2947726.1 hypothetical protein DAI22_02g389700 [Oryza sativa Japonica Group] &gt;BAD22859.1 putative finger protein EPF1 [Oryza sativa Japonica Group] &gt;BAD22927.1 putative finger protein EPF1 [Oryza sativa Japonica Group] &gt;BAS81665.1 Os02g0823900 [Oryza sativa Japo…
C2H2	0	0	2.5587	2.24034	LOC4332342	LOC_Os03g15790	Os03g0264600	LOC_Os03g15790.1	NA
C2H2	0	0	-1.35948	-1.48713	LOC4336606	LOC_Os04g46680	Os04g0552700	LOC_Os04g46680.1	zinc finger protein ZAT1 [Oryza sativa Japonica Group]
C2H2	0	0	1.40939	1.48504	LOC4339823	LOC_Os05g51830	Os05g0597100	LOC_Os05g51830.1	histone deacetylase HDT2 [Oryza sativa Japonica Group] &gt;EEE64928.1 hypothetical protein OsJ_19788 [Oryza sativa Japonica Group] &gt;BAF18437.1 Os05g0597100 [Oryza sativa Japonica Group] &gt;BAG93172.1 unnamed protein product [Oryza sativa Japonica Group] &gt;BAS95687.1 Os05g0597100 [Oryza sativa Japonica Group]
C2H2	0	0	0	2.05591	LOC4344057	LOC_Os07g44640	Os07g0640000	LOC_Os07g44640.1	probable protein arginine N-methyltransferase 3 [Oryza sativa Japonica Group] &gt;A3BMN9.1 RecName: Full=Probable protein arginine N-methyltransferase 3 [Oryza sativa Japonica Group] &gt;EAZ40828.1 hypothetical protein OsJ_25304 [Oryza sativa Japonica Group]
C2H2	0	0	0	1.10295	LOC4345790	LOC_Os08g36390	Os08g0467100	LOC_Os08g36390.1	protein SHOOT GRAVITROPISM 5 [Oryza sativa Japonica Group] &gt;KAB8108807.1 hypothetical protein EE612_044789 [Oryza sativa] &gt;KAF2920047.1 hypothetical protein DAI22_08g181200 [Oryza sativa Japonica Group] &gt;BAD09547.1 putative zinc finger protein [Oryza sativa Japonica Group] &gt;BAD10782.1 putative zinc finger protein [Oryza sativa Japonica Group] &gt;BAG97837.1 unnamed protein product [Or…
C2H2	0	0	-2.3378	0	LOC4327377	LOC_Os01g62130	Os01g0838600	LOC_Os01g62130.1	zinc finger protein ZAT12 [Oryza sativa Japonica Group] &gt;KAB8084217.1 hypothetical protein EE612_006713 [Oryza sativa] &gt;KAF2953210.1 hypothetical protein DAI22_01g393200 [Oryza sativa Japonica Group] &gt;BAD81695.1 zinc finger transcription factor ZFP19 [Oryza sativa Japonica Group] &gt;BAF06661.2 Os01g0838600 [Oryza sativa Japonica Group] &gt;BAS75135.1 Os01g0838600 [Oryza sativa Japonica …
C2H2	0	0	-7.36869	0	LOC9271610	LOC_Os04g08290	Os04g0165200	LOC_Os04g08290.1	protein SENSITIVE TO PROTON RHIZOTOXICITY 2 [Oryza sativa Japonica Group]
C2H2	0	0	-1.03895	0	LOC4340243	LOC_Os06g07020	Os06g0166200	LOC_Os06g07020.1	uncharacterized protein LOC4340243 [Oryza sativa Japonica Group]
C2H2	0	0	1.75135	0	LOC4344057	LOC_Os07g44640	Os07g0640000	LOC_Os07g44640.1	probable protein arginine N-methyltransferase 3 [Oryza sativa Japonica Group] &gt;A3BMN9.1 RecName: Full=Probable protein arginine N-methyltransferase 3 [Oryza sativa Japonica Group] &gt;EAZ40828.1 hypothetical protein OsJ_25304 [Oryza sativa Japonica Group]
C2H2	3.6061	3.42461	2.91471	0	LOC4325059	LOC_Os01g63980	Os01g0859100	LOC_Os01g63980.1	protein TRANSPARENT TESTA 1 [Oryza sativa Japonica Group] &gt;XP_052135727.1 protein TRANSPARENT TESTA 1-like [Oryza glaberrima] &gt;KAB8084387.1 hypothetical protein EE612_006944 [Oryza sativa] &gt;KAF2953409.1 hypothetical protein DAI22_01g406900 [Oryza sativa Japonica Group] &gt;BAF06778.1 Os01g0859100 [Oryza sativa Japonica Group] &gt;BAG89073.1 unnamed protein product [Oryza sativa Japonica …
C2H2	5.04061	4.15941	2.80208	0	LOC4333197	LOC_Os03g32230	Os03g0437200	LOC_Os03g32230.1	zinc finger protein 36-like [Oryza sativa Japonica Group] &gt;Q75KE5.1 RecName: Full=Zinc finger protein 36; AltName: Full=Protein BROAD-SPECTRUM RESISTANCE DIGU 1 [Oryza sativa Japonica Group] &gt;EAY90588.1 hypothetical protein OsI_12190 [Oryza sativa Indica Group] &gt;KAB8092319.1 hypothetical protein EE612_018309 [Oryza sativa] &gt;AAR89021.1 C2H2-type zinc finger protein ZFP36 [Oryza sativa …
C2H2	2.03181	1.56288	0	0	LOC4334213	LOC_Os03g55540	Os03g0764100	LOC_Os03g55540.1	zinc finger protein 1 [Oryza sativa Japonica Group] &gt;AAK01713.1 zinc finger transcription factor ZF1 [Oryza sativa Indica Group] &gt;KAB8093711.1 hypothetical protein EE612_020626 [Oryza sativa] &gt;AAL34135.1 zinc finger transcription factor ZF1 [Oryza sativa Japonica Group] &gt;ABF99028.1 Zinc-finger protein 1, putative, expressed [Oryza sativa Japonica Group] &gt;EAY91956.1 hypothetical pro…
C2H2	2.10683	2.21507	0	0	LOC4334592	LOC_Os03g60560	Os03g0820300	LOC_Os03g60560.1	zinc finger protein ZAT12 [Oryza sativa Japonica Group] &gt;EAY92365.1 hypothetical protein OsI_14094 [Oryza sativa Indica Group] &gt;KAB8094207.1 hypothetical protein EE612_021325 [Oryza sativa] &gt;AAO65881.1 putative Cys2/His2 zinc-finger protein [Oryza sativa Japonica Group] &gt;AAP42461.1 zinc finger protein ZFP182 [Oryza sativa Japonica Group] &gt;ABF99585.1 Zinc finger, C2H2 type family pr…
C2H2	3.30923	3.16807	0	0	LOC4334593	LOC_Os03g60570	Os03g0820400	LOC_Os03g60570.1	zinc finger protein ZAT12 [Oryza sativa Japonica Group] &gt;ABY66164.1 zinc finger protein [Oryza sativa Indica Group] &gt;KAB8094208.1 hypothetical protein EE612_021330 [Oryza sativa] &gt;AAO65858.1 putative Cys2/His2 zinc-finger protein [Oryza sativa Japonica Group] &gt;AAP42460.1 zinc finger protein ZFP15 [Oryza sativa Japonica Group] &gt;AAP74356.1 C2H2 type zinc finger transcription factor Z…
C2H2	0	1.02933	0	0	LOC4332200	LOC_Os03g13600	Os03g0239300	LOC_Os03g13600.1;LOC_Os03g13600.2	zinc finger protein 7 [Oryza sativa Japonica Group] &gt;XP_025879942.1 zinc finger protein 7 [Oryza sativa Japonica Group] &gt;EAY89193.1 hypothetical protein OsI_10690 [Oryza sativa Indica Group] &gt;KAB8091004.1 hypothetical protein EE612_016390 [Oryza sativa] &gt;ABF94874.1 Zinc finger, C2H2 type family protein, expressed [Oryza sativa Japonica Group] &gt;ABF94875.1 Zinc finger, C2H2 type fami…
TALE	0	0	10.1578	10.8044	LOC4333973	LOC_Os03g51690	Os03g0727000	LOC_Os03g51690.3;LOC_Os03g51690.1;LOC_Os03g51690.2	NA
TALE	0	0	3.74535	3.56447	LOC4337701	LOC_Os05g03884	Os05g0129700	LOC_Os05g03884.1	homeobox protein knotted-1-like 10 [Oryza sativa Japonica Group] &gt;XP_052155920.1 homeobox protein knotted-1-like 10 [Oryza glaberrima] &gt;A2Y007.2 RecName: Full=Homeobox protein knotted-1-like 10; AltName: Full=Homeobox protein HOS9; AltName: Full=Homeobox protein OSH71; AltName: Full=Homeobox protein knotted-1-like 2; Short=Oskn2 [Oryza sativa Indica Group] &gt;Q7GDL5.1 RecName: Full=Homeobo…
TALE	0	0	1.7644	1.58145	LOC4328784	LOC_Os02g13310	Os02g0226600	LOC_Os02g13310.1	homeobox protein ATH1 isoform X2 [Oryza sativa Japonica Group] &gt;XP_025878539.1 homeobox protein ATH1 isoform X2 [Oryza sativa Japonica Group] &gt;EEE56592.1 hypothetical protein OsJ_05952 [Oryza sativa Japonica Group] &gt;KAF2943855.1 hypothetical protein DAI22_02g096300 [Oryza sativa Japonica Group] &gt;BAD25657.1 putative homeobox protein [Oryza sativa Japonica Group] &gt;BAF08260.1 Os02g022…
TALE	0	0	1.66644	1.87963	LOC4341309	LOC_Os06g36680	Os06g0562300	LOC_Os06g36680.1	BEL1-like homeodomain protein 1 isoform X1 [Oryza sativa Japonica Group] &gt;XP_015641754.1 BEL1-like homeodomain protein 1 isoform X1 [Oryza sativa Japonica Group] &gt;XP_025882414.1 BEL1-like homeodomain protein 1 isoform X1 [Oryza sativa Japonica Group] &gt;KAB8102815.1 hypothetical protein EE612_034826 [Oryza sativa] &gt;KAF2927208.1 hypothetical protein DAI22_06g187700 [Oryza sativa Japonica…
TALE	0	0	-2.86693	-2.07572	LOC4331452	LOC_Os03g03260	Os03g0124000	LOC_Os03g03260.1	homeobox protein BEL1 homolog [Oryza sativa Japonica Group] &gt;KAB8089968.1 hypothetical protein EE612_015016 [Oryza sativa] &gt;ABF93732.1 Associated with HOX family protein, expressed [Oryza sativa Japonica Group] &gt;KAF2937025.1 hypothetical protein DAI22_03g020500 [Oryza sativa Japonica Group] &gt;KAF2937026.1 hypothetical protein DAI22_03g020500 [Oryza sativa Japonica Group] &gt;BAF10722.1…
TALE	0	0	-1.30421	-1.08798	LOC4331729	LOC_Os03g06930	Os03g0165300	LOC_Os03g06930.1	NA
TALE	0	0	-1.48498	-1.5214	LOC9266975	LOC_Os03g52239	Os03g0732100	LOC_Os03g52239.1;LOC_Os03g52239.2;LOC_Os03g52239.3	NA
TALE	0	0	-3.67626	-1.89517	LOC4339876	LOC_Os06g01934	Os06g0108900	LOC_Os06g01934.1	NA
TALE	0	0	-2.4185	-1.71248	LOC4341661	LOC_Os06g43860	Os06g0646600	LOC_Os06g43860.4;LOC_Os06g43860.2;LOC_Os06g43860.1	NA
TALE	0	0	-1.97004	-1.69372	LOC4345191	LOC_Os08g19650	Os08g0292900	LOC_Os08g19650.2;LOC_Os08g19650.1	LOW QUALITY PROTEIN: homeobox protein knotted-1-like 13 [Oryza sativa Japonica Group]
TALE	0	0	-2.19696	-1.75422	LOC4349233	LOC_Os10g39030	Os10g0534900	LOC_Os10g39030.1	BEL1-like homeodomain protein 4 [Oryza sativa Japonica Group] &gt;KAB8113465.1 hypothetical protein EE612_052468 [Oryza sativa] &gt;AAM88627.1 putative homeodomain protein [Oryza sativa Japonica Group] &gt;AAP54799.1 Associated with HOX family protein, expressed [Oryza sativa Japonica Group] &gt;KAF2914562.1 hypothetical protein DAI22_10g172600 [Oryza sativa Japonica Group] &gt;BAF27078.1 Os10g05…
TALE	0	0	-1.57146	-1.19229	LOC4349837	LOC_Os11g06020	Os11g0158600	LOC_Os11g06020.1	BEL1-like homeodomain protein 1 [Oryza sativa Japonica Group] &gt;XP_015616923.1 BEL1-like homeodomain protein 1 [Oryza sativa Japonica Group] &gt;XP_015616924.1 BEL1-like homeodomain protein 1 [Oryza sativa Japonica Group] &gt;XP_015616925.1 BEL1-like homeodomain protein 1 [Oryza sativa Japonica Group] &gt;EEC67717.1 hypothetical protein OsI_35198 [Oryza sativa Indica Group] &gt;ABA91569.1 Assoc…
TALE	0	0	-1.57769	-1.06191	LOC4352890	LOC_Os12g43950	Os12g0636200	LOC_Os12g43950.1;LOC_Os12g43950.2;LOC_Os12g43950.3;LOC_Os12g43950.4	BEL1-like homeodomain protein 7 [Oryza sativa Japonica Group] &gt;XP_015619823.1 BEL1-like homeodomain protein 7 [Oryza sativa Japonica Group] &gt;XP_025878002.1 BEL1-like homeodomain protein 7 [Oryza sativa Japonica Group] &gt;KAB8118355.1 hypothetical protein EE612_061139 [Oryza sativa] &gt;ABA99971.1 Associated with HOX family protein, expressed [Oryza sativa Japonica Group] &gt;EAZ21338.1 hyp…
TALE	0	0	0	6.38796	LOC4333975	LOC_Os03g51710	Os03g0727200	LOC_Os03g51710.2;LOC_Os03g51710.1	homeobox protein knotted-1-like 7 [Oryza sativa Japonica Group] &gt;Q948L5.1 RecName: Full=Homeobox protein knotted-1-like 7; AltName: Full=Homeobox protein HOS13; AltName: Full=Homeobox protein OSH3 [Oryza sativa Japonica Group] &gt;AAS07153.1 knotted1-type homeobox protein [Oryza sativa Japonica Group] &gt;ABF98655.1 KNOX1 domain containing protein, expressed [Oryza sativa Japonica Group] &gt;K…
TALE	0	0	4.90459	0	LOC4342320	LOC_Os07g03770	Os07g0129700	LOC_Os07g03770.1	NA
TALE	0	0	4.10942	0	LOC4325788	LOC_Os01g19694	Os01g0302500	LOC_Os01g19694.1	NA
TALE	0	0	-1.16364	0	LOC4338977	LOC_Os05g38120	Os05g0455200	LOC_Os05g38120.1	NA
G2-like	2.1484	3.63228	1.14084	3.2991	LOC4326391	LOC_Os01g74020	Os01g0971800	LOC_Os01g74020.1	NA
G2-like	-1.74663	-1.28478	-1.71293	-1.88441	LOC4329184	LOC_Os02g22020	Os02g0325600	LOC_Os02g22020.1	transcription factor NIGT1 [Oryza sativa Japonica Group] &gt;XP_052141907.1 transcription factor NIGT1 [Oryza glaberrima] &gt;Q6Z869.1 RecName: Full=Transcription factor NIGT1; AltName: Full=MYB-domain transcription factor NIGT1; AltName: Full=Protein NITRATE-INDUCIBLE GARP-TYPE TRANSCRIPTIONAL REPRESSOR 1 [Oryza sativa Japonica Group] &gt;KAB8087068.1 hypothetical protein EE612_010868 [Oryza sat…
G2-like	-1.14134	-1.53719	-1.88175	-2.35908	LOC4340977	LOC_Os06g24070	Os06g0348800	LOC_Os06g24070.1	NA
G2-like	-1.22616	0	-2.48555	-2.53768	LOC4339151	LOC_Os05g40960	Os05g0488600	LOC_Os05g40960.1	myb-related protein 2 isoform X1 [Oryza sativa Japonica Group] &gt;XP_015640414.1 myb-related protein 2 isoform X1 [Oryza sativa Japonica Group] &gt;XP_015640415.1 myb-related protein 2 isoform X1 [Oryza sativa Japonica Group] &gt;KAB8099957.1 hypothetical protein EE612_030294 [Oryza sativa] &gt;EEE64175.1 hypothetical protein OsJ_19007 [Oryza sativa Japonica Group] &gt;KAF2931371.1 hypothetical …
G2-like	-1.125	-1.26622	-1.36221	-1.51086	LOC4341990	LOC_Os06g49040	Os06g0703900	LOC_Os06g49040.1	protein PHOSPHATE STARVATION RESPONSE 3-like [Oryza sativa Japonica Group] &gt;KAB8103762.1 hypothetical protein EE612_036357 [Oryza sativa] &gt;EEE66318.1 hypothetical protein OsJ_22555 [Oryza sativa Japonica Group] &gt;KAF2928359.1 hypothetical protein DAI22_06g273100 [Oryza sativa Japonica Group] &gt;BAD54045.1 putative transfactor [Oryza sativa Japonica Group] &gt;BAF20417.1 Os06g0703900 [Ory…
G2-like	-1.0021	0	-1.28546	-1.02355	LOC4344327	LOC_Os07g48596	Os07g0685300	LOC_Os07g48596.1	myb-related protein 1 isoform X1 [Oryza sativa Japonica Group] &gt;XP_052160854.1 myb-related protein 1-like isoform X1 [Oryza glaberrima] &gt;KAF2924572.1 hypothetical protein DAI22_07g277500 [Oryza sativa Japonica Group]
G2-like	0	0	4.07576	4.14194	LOC112936623	LOC_Os10g39550	Os10g0541500	LOC_Os10g39550.1	uncharacterized protein LOC112936623 isoform X1 [Oryza sativa Japonica Group] &gt;KAF2914619.1 hypothetical protein DAI22_10g177100 [Oryza sativa Japonica Group]
G2-like	0	0	-1.05379	-1.12692	LOC4341235	LOC_Os06g35140	Os06g0543200	LOC_Os06g35140.1	uncharacterized protein LOC4341235 isoform X1 [Oryza sativa Japonica Group] &gt;KAB8102772.1 hypothetical protein EE612_034739 [Oryza sativa] &gt;EAZ37279.1 hypothetical protein OsJ_21617 [Oryza sativa Japonica Group] &gt;KAF2927117.1 hypothetical protein DAI22_06g180200 [Oryza sativa Japonica Group] &gt;BAD54297.1 MYB transcription factor-like [Oryza sativa Japonica Group] &gt;BAF19724.1 Os06g05…
G2-like	0	0	-1.44995	-1.35891	LOC4332704	LOC_Os03g20900	Os03g0325500	LOC_Os03g20900.1	myb-related protein 2 isoform X1 [Oryza sativa Japonica Group] &gt;KAB8091611.1 hypothetical protein EE612_017141 [Oryza sativa] &gt;ABF95708.1 transfactor, putative, expressed [Oryza sativa Japonica Group] &gt;EAZ26768.1 hypothetical protein OsJ_10679 [Oryza sativa Japonica Group] &gt;KAF2939034.1 hypothetical protein DAI22_03g162900 [Oryza sativa Japonica Group] &gt;BAF11898.1 Os03g0325500 [Ory…
G2-like	0	0	0	-1.06843	LOC4326363	LOC_Os01g13740	Os01g0239000	LOC_Os01g13740.1;LOC_Os01g13740.2	probable transcription factor GLK2 isoform X2 [Oryza sativa Japonica Group] &gt;KAF2949330.1 hypothetical protein DAI22_01g098100 [Oryza sativa Japonica Group]
G2-like	0	0	0	-1.09738	LOC4341803	LOC_Os06g45890	Os06g0670300	LOC_Os06g45890.1	probable transcription factor KAN3 [Oryza sativa Japonica Group] &gt;A0A0P0X0C0.1 RecName: Full=Myb family transcription factor MPH1; AltName: Full=Myb transcription factor 45; Short=OsMYB45; AltName: Full=Protein MYB-LIKE GENE OF PLANT HEIGHT 1; Short=OsMPH1 [Oryza sativa Japonica Group] &gt;EAZ02029.1 hypothetical protein OsI_24061 [Oryza sativa Indica Group] &gt;KAB8103486.1 hypothetical prote…
G2-like	0	0	0	2.01766	LOC107276067	LOC_Os02g45080	Os02g0672300	LOC_Os02g45080.1	uncharacterized protein LOC107276067 [Oryza sativa Japonica Group] &gt;XP_052142278.1 myb family transcription factor MOF1-like [Oryza glaberrima] &gt;EEE57556.1 hypothetical protein OsJ_07894 [Oryza sativa Japonica Group] &gt;KAF2946307.1 hypothetical protein DAI22_02g283100 [Oryza sativa Japonica Group]
G2-like	0	0	1.17447	0	LOC4336691	LOC_Os04g47890	Os04g0566600	LOC_Os04g47890.1	putative Myb family transcription factor At1g14600 [Oryza sativa Japonica Group] &gt;XP_052151329.1 myb family transcription factor MOF1 [Oryza glaberrima] &gt;A3AWH5.1 RecName: Full=Myb family transcription factor MOF1; AltName: Full=Protein MORE FLORET 1 [Oryza sativa Japonica Group] &gt;KAB8096507.1 hypothetical protein EE612_024976 [Oryza sativa] &gt;EAZ31664.1 hypothetical protein OsJ_15811 …
G2-like	0	0	-1.08476	0	LOC4332726	LOC_Os03g21240	Os03g0329900	LOC_Os03g21240.1	protein PHOSPHATE STARVATION RESPONSE 1 [Oryza sativa Japonica Group] &gt;Q10LZ1.1 RecName: Full=Protein PHOSPHATE STARVATION RESPONSE 1; Short=OsPHR1 [Oryza sativa Japonica Group] &gt;KAB8091644.1 hypothetical protein EE612_017190 [Oryza sativa] &gt;ABF95748.1 myb-like DNA-binding domain, SHAQKYF class family protein, expressed [Oryza sativa Japonica Group] &gt;EEE58994.1 hypothetical protein Os…
G2-like	0	0	-1.05751	0	LOC4337318	LOC_Os04g56990	Os04g0665600	LOC_Os04g56990.1;LOC_Os04g56990.2;LOC_Os04g56990.3	uncharacterized protein LOC4337318 isoform X1 [Oryza sativa Japonica Group] &gt;XP_015636270.1 uncharacterized protein LOC4337318 isoform X1 [Oryza sativa Japonica Group] &gt;XP_015636271.1 uncharacterized protein LOC4337318 isoform X1 [Oryza sativa Japonica Group] &gt;XP_015636272.1 uncharacterized protein LOC4337318 isoform X1 [Oryza sativa Japonica Group] &gt;XP_025880593.1 uncharacterized pro…
G2-like	1.13331	0	0	0	LOC4334216	LOC_Os03g55590	Os03g0764600	LOC_Os03g55590.1;LOC_Os03g55590.3;LOC_Os03g55590.4	NA
HD-ZIP	1.58611	1.68899	2.18372	1.83344	LOC4340445	LOC_Os06g10600	Os06g0208100	LOC_Os06g10600.1	NA
HD-ZIP	0	1.62778	2.84754	2.26548	LOC4331956	LOC_Os03g10210	Os03g0198600	LOC_Os03g10210.1	homeobox-leucine zipper protein HOX12 [Oryza sativa Japonica Group] &gt;XP_052149088.1 homeobox-leucine zipper protein HOX12 [Oryza glaberrima] &gt;Q10QF2.1 RecName: Full=Homeobox-leucine zipper protein HOX12; AltName: Full=HD-ZIP protein HOX12; AltName: Full=Homeodomain transcription factor HOX12; AltName: Full=OsHox12 [Oryza sativa Japonica Group] &gt;KAB8090657.1 hypothetical protein EE612_015…
HD-ZIP	0	1.04516	1.74514	1.6399	LOC4348492	LOC_Os10g23090	Os10g0377300	LOC_Os10g23090.2;LOC_Os10g23090.1	homeobox-leucine zipper protein HOX8 [Oryza sativa Japonica Group] &gt;Q338Z7.1 RecName: Full=Homeobox-leucine zipper protein HOX8; AltName: Full=HD-ZIP protein HOX8; AltName: Full=Homeodomain transcription factor HOX8; AltName: Full=OsHox8 [Oryza sativa Japonica Group] &gt;KAB8112547.1 hypothetical protein EE612_051028 [Oryza sativa] &gt;ABB47385.1 Homeobox domain containing protein, expressed […
HD-ZIP	0	1.54177	2.18863	1.63131	LOC4340069	LOC_Os06g04850	Os06g0140400	LOC_Os06g04850.1	NA
HD-ZIP	0	0	1.57065	1.29064	LOC4331774	LOC_Os03g07450	Os03g0170600	LOC_Os03g07450.1	homeobox-leucine zipper protein HOX21 [Oryza sativa Japonica Group] &gt;Q8S7W9.1 RecName: Full=Homeobox-leucine zipper protein HOX21; AltName: Full=HD-ZIP protein HOX21; AltName: Full=Homeodomain transcription factor HOX21; AltName: Full=OsHox21 [Oryza sativa Japonica Group] &gt;AAL84311.1 putative DNA-binding protein [Oryza sativa Japonica Group] &gt;ABF94207.1 DNA-binding protein, putative, exp…
HD-ZIP	0	0	-1.30453	-1.00084	LOC4349388	LOC_Os10g41230	Os10g0561800	LOC_Os10g41230.1	homeobox-leucine zipper protein HOX1 [Oryza sativa Japonica Group] &gt;Q7XC54.1 RecName: Full=Homeobox-leucine zipper protein HOX1; AltName: Full=HD-ZIP protein HOX1; AltName: Full=Homeodomain transcription factor HOX1; AltName: Full=OsHox1 [Oryza sativa Japonica Group] &gt;KAB8113696.1 hypothetical protein EE612_052789 [Oryza sativa] &gt;AAK31270.1 homeodomain leucine zipper protein hox1 [Oryza …
HD-ZIP	0	0	-1.07497	-1.22763	LOC4331890	LOC_Os03g08960	Os03g0188900	LOC_Os03g08960.1	NA
HD-ZIP	0	0	-1.79102	-2.19119	LOC4336542	LOC_Os04g45810	Os04g0541700	LOC_Os04g45810.1	NA
HD-ZIP	0	0	0	3.8412	LOC4326566	LOC_Os01g45570	Os01g0643600	LOC_Os01g45570.1	homeobox-leucine zipper protein HOX3 isoform X2 [Oryza sativa Japonica Group]
HD-ZIP	0	0	0	-1.01019	LOC4336705	LOC_Os04g48070	Os04g0569100	LOC_Os04g48070.2;LOC_Os04g48070.3;LOC_Os04g48070.1	homeobox-leucine zipper protein ROC4 [Oryza sativa Japonica Group] &gt;KAB8096528.1 hypothetical protein EE612_025006 [Oryza sativa] &gt;KAF2935415.1 hypothetical protein DAI22_04g229800 [Oryza sativa Japonica Group] &gt;CAD41424.2 OSJNBb0032E06.7 [Oryza sativa Japonica Group] &gt;BAF15509.1 Os04g0569100 [Oryza sativa Japonica Group] &gt;BAS90557.1 Os04g0569100 [Oryza sativa Japonica Group]
HD-ZIP	0	0	1.26029	0	LOC4340070	LOC_Os06g04870	Os06g0140700	LOC_Os06g04870.1	homeobox-leucine zipper protein HOX2 [Oryza sativa Japonica Group] &gt;Q5VPE3.1 RecName: Full=Homeobox-leucine zipper protein HOX2; AltName: Full=HD-ZIP protein HOX2; AltName: Full=Homeodomain transcription factor HOX2; AltName: Full=OsHox2 [Oryza sativa Japonica Group] &gt;Q84U86.1 RecName: Full=Homeobox-leucine zipper protein HOX2; AltName: Full=HD-ZIP protein HOX2; AltName: Full=Homeodomain tr…
HD-ZIP	0	0	7.62691	0	LOC4343726	LOC_Os07g39320	Os07g0581700	LOC_Os07g39320.1	homeobox-leucine zipper protein HOX14 [Oryza sativa Japonica Group] &gt;Q7XI85.1 RecName: Full=Homeobox-leucine zipper protein HOX14; AltName: Full=HD-ZIP protein HOX14; AltName: Full=Homeodomain transcription factor HOX14; AltName: Full=OsHox14 [Oryza sativa Japonica Group] &gt;EEC82332.1 hypothetical protein OsI_26626 [Oryza sativa Indica Group] &gt;KAB8106101.1 hypothetical protein EE612_04030…
HD-ZIP	0	0	-1.10615	0	LOC4347333	LOC_Os09g29460	Os09g0470500	LOC_Os09g29460.1	homeobox-leucine zipper protein HOX4 [Oryza sativa Japonica Group] &gt;Q6K498.1 RecName: Full=Homeobox-leucine zipper protein HOX4; AltName: Full=HD-ZIP protein HOX4; AltName: Full=Homeodomain transcription factor HOX4; AltName: Full=OsHox4 [Oryza sativa Japonica Group] &gt;Q9XH37.1 RecName: Full=Homeobox-leucine zipper protein HOX4; AltName: Full=HD-ZIP protein HOX4; AltName: Full=Homeodomain tr…
HD-ZIP	0	1.58775	0	0	LOC4330155	LOC_Os02g43330	Os02g0649300	LOC_Os02g43330.1	NA
MYB-related	-1.84787	-1.91984	-2.40183	-2.60125	LOC4339715	LOC_Os05g50340	Os05g0579600	LOC_Os05g50340.1	protein RADIALIS-like 3 [Oryza sativa Japonica Group] &gt;XP_052156390.1 protein RADIALIS-like 3 [Oryza glaberrima] &gt;EAY99166.1 hypothetical protein OsI_21125 [Oryza sativa Indica Group] &gt;KAB8100737.1 hypothetical protein EE612_031331 [Oryza sativa] &gt;EEE64813.1 hypothetical protein OsJ_19669 [Oryza sativa Japonica Group] &gt;KAF2932287.1 hypothetical protein DAI22_05g276100 [Oryza sativa…	MYB_related
MYB-related	-2.13735	-2.56341	-2.07948	-2.8029	LOC4344703	LOC_Os08g06110	Os08g0157600	LOC_Os08g06110.2;LOC_Os08g06110.3;LOC_Os08g06110.4;LOC_Os08g06110.5	protein LHY isoform X1 [Oryza sativa Japonica Group] &gt;XP_015649836.1 protein LHY isoform X1 [Oryza sativa Japonica Group] &gt;XP_015649837.1 protein LHY isoform X1 [Oryza sativa Japonica Group] &gt;XP_025875636.1 protein LHY isoform X1 [Oryza sativa Japonica Group] &gt;XP_025875637.1 protein LHY isoform X1 [Oryza sativa Japonica Group] &gt;XP_025875638.1 protein LHY isoform X1 [Oryza sativa Ja…	MYB_related
MYB-related	0	-1.38319	-1.55292	-1.95257	LOC9272080	LOC_Os02g45670	Os02g0680700	LOC_Os02g45670.1	protein REVEILLE 6 isoform X1 [Oryza sativa Japonica Group]
MYB-related	0	-1.31062	-1.31421	-3.03377	LOC4342135	LOC_Os06g51260	Os06g0728700	LOC_Os06g51260.1	protein REVEILLE 1 isoform X1 [Oryza sativa Japonica Group] &gt;EEE66394.1 hypothetical protein OsJ_22733 [Oryza sativa Japonica Group] &gt;KAF2928608.1 hypothetical protein DAI22_06g291600 [Oryza sativa Japonica Group] &gt;BAD61826.1 putative MYB transcription factor [Oryza sativa Japonica Group] &gt;BAD62104.1 putative MYB transcription factor [Oryza sativa Japonica Group] &gt;BAF20559.1 Os06g0…	MYB_related
MYB-related	-1.06082	0	-2.33661	-2.01397	LOC4349391	LOC_Os10g41260	Os10g0562100	LOC_Os10g41260.1	NA	MYB_related
MYB-related	-2.371	0	-1.7157	-3.78344	LOC4330349	LOC_Os02g46030	Os02g0685200	LOC_Os02g46030.1	protein REVEILLE 1 isoform X1 [Oryza sativa Japonica Group]	MYB_related
MYB-related	0	0	-1.38546	-1.11344	LOC4323963	LOC_Os01g34060	Os01g0524500	LOC_Os01g34060.1	NA
MYB-related	0	0	-1.22485	-1.61764	LOC107278244	LOC_Os01g43230	Os01g0619900	LOC_Os01g43230.2;LOC_Os01g43230.3	MYB-like transcription factor ETC3 isoform X1 [Oryza sativa Japonica Group] &gt;XP_052156270.1 MYB-like transcription factor ETC3 [Oryza glaberrima]	MYB_related
MYB-related	0	0	-1.29112	-1.47331	LOC4339780	LOC_Os05g51160	Os05g0589400	LOC_Os05g51160.1;LOC_Os05g51160.2	transcription factor MYBS3-like [Oryza sativa Japonica Group] &gt;XP_052155084.1 transcription factor MYBS3-like [Oryza glaberrima] &gt;KAB8100830.1 hypothetical protein EE612_031453 [Oryza sativa] &gt;AAT58809.1 putative myb transcription factor [Oryza sativa Japonica Group] &gt;ADX60223.1 MYB-related transcription factor, partial [Oryza sativa Japonica Group] &gt;KAB8100831.1 hypothetical prote…	MYB_related
MYB-related	0	0	-1.49984	-1.36136	LOC4339863	LOC_Os06g01670	Os06g0105800	LOC_Os06g01670.1	protein REVEILLE 6 [Oryza sativa Japonica Group] &gt;BAD67706.1 putative MYB29 protein [Oryza sativa Japonica Group] &gt;BAF18473.1 Os06g0105800 [Oryza sativa Japonica Group] &gt;BAG99362.1 unnamed protein product [Oryza sativa Japonica Group] &gt;BAG99725.1 unnamed protein product [Oryza sativa Japonica Group] &gt;BAS95745.1 Os06g0105800 [Oryza sativa Japonica Group]	MYB_related
MYB-related	0	0	0	-1.26725	LOC4349385	LOC_Os10g41200	Os10g0561400	LOC_Os10g41200.1;LOC_Os10g41200.3	NA	MYB_related
MYB-related	5.58298	0	4.0693	0	LOC9266268	LOC_Os05g07010	Os05g0162800	LOC_Os05g07010.1;LOC_Os05g07010.2	NA	MYB_related
MYB-related	0	0	-1.33727	0	LOC4338039	LOC_Os05g10690	Os05g0195700	LOC_Os05g10690.1	transcription factor MYBS3-like [Oryza sativa Japonica Group] &gt;AAT38072.1 putative Myb-related transcription factor [Oryza sativa Japonica Group] &gt;EEE62638.1 hypothetical protein OsJ_17441 [Oryza sativa Japonica Group] &gt;KAF2929534.1 hypothetical protein DAI22_05g064100 [Oryza sativa Japonica Group] &gt;BAF16777.1 Os05g0195700 [Oryza sativa Japonica Group] &gt;BAG87919.1 unnamed protein p…	MYB_related
MYB-related	0	0	1.40748	0	LOC107276546	LOC_Os03g62100	Os03g0837200	LOC_Os03g62100.1	transcription factor MYBS1-like [Oryza sativa Japonica Group] &gt;AAO41136.1 putative myb-like protein [Oryza sativa Japonica Group] &gt;ABF99772.1 Myb-like DNA-binding domain containing protein [Oryza sativa Japonica Group] &gt;EAY92493.1 hypothetical protein OsI_14230 [Oryza sativa Indica Group]	MYB_related
HSF	-1.36995	-1.39142	-3.03515	-2.27899	LOC4326685	LOC_Os01g43590	Os01g0625300	LOC_Os01g43590.1;LOC_Os01g43590.2	NA
HSF	-1.71115	0	-1.5953	-1.7867	LOC4328809	LOC_Os02g13800	Os02g0232000	LOC_Os02g13800.1	NA
HSF	6.13948	5.05981	2.95193	0	LOC4334080	LOC_Os03g53340	Os03g0745000	LOC_Os03g53340.1;LOC_Os03g53340.2;LOC_Os03g53340.3;LOC_Os03g53340.6	NA
HSF	2.05792	1.73872	1.34575	0	LOC4336701	LOC_Os04g48030	Os04g0568700	LOC_Os04g48030.1	NA
HSF	2.68087	2.26431	1.75501	0	LOC4346229	LOC_Os08g43334	Os08g0546800	LOC_Os08g43334.1;LOC_Os08g43334.2	heat stress transcription factor B-2b isoform X1 [Oryza sativa Japonica Group] &gt;AAQ23056.1 heat shock factor RHSF2 [Oryza sativa Japonica Group] &gt;BAF24337.1 Os08g0546800 [Oryza sativa Japonica Group]
HSF	2.26173	1.61525	1.82608	0	LOC4347637	LOC_Os09g35790	Os09g0526600	LOC_Os09g35790.1;LOC_Os09g35790.2;LOC_Os09g35790.3	heat stress transcription factor B-2c isoform X6 [Oryza sativa Japonica Group]
HSF	0	0	2.58093	2.41623	LOC107277264	LOC_Os03g25120	Os03g0366800	LOC_Os03g25120.1	heat stress transcription factor B-4d [Oryza sativa Japonica Group] &gt;XP_025880033.1 heat stress transcription factor B-4d [Oryza sativa Japonica Group] &gt;XP_025880034.1 heat stress transcription factor B-4d [Oryza sativa Japonica Group] &gt;XP_025880035.1 heat stress transcription factor B-4d [Oryza sativa Japonica Group] &gt;XP_025880036.1 heat stress transcription factor B-4d [Oryza sativa…
HSF	0	0	2.26591	2.01713	LOC4344063	LOC_Os07g44690	Os07g0640900	LOC_Os07g44690.1	NA
HSF	0	0	-1.02142	-1.04203	LOC4331707	LOC_Os03g06630	Os03g0161900	LOC_Os03g06630.1;LOC_Os03g06630.2	NA
HSF	0	1.94311	0	1.73471	LOC4324158	LOC_Os01g53220	Os01g0733200	LOC_Os01g53220.1	heat stress transcription factor C-1b [Oryza sativa Japonica Group] &gt;Q942D6.1 RecName: Full=Heat stress transcription factor C-1b; AltName: Full=Heat stress transcription factor 11; Short=rHsf11; AltName: Full=Heat stress transcription factor 3; Short=OsHsf-03 [Oryza sativa Japonica Group] &gt;KAB8083375.1 hypothetical protein EE612_005539 [Oryza sativa] &gt;AAQ23065.1 heat shock factor RHSF11…
HSF	0	0	0	5.24168	LOC107275533	LOC_Os08g36700	Os08g0471000	LOC_Os08g36700.1	NA
HSF	0	0	0	1.07021	LOC4326351	LOC_Os01g39020	Os01g0571300	LOC_Os01g39020.1	NA
NF-Ys	0	-1.44169	-1.3991	-1.85692	LOC4343856	LOC_Os07g41580	Os07g0606600	LOC_Os07g41580.1	nuclear transcription factor Y subunit B-10 [Oryza sativa Japonica Group] &gt;Q69J40.1 RecName: Full=Nuclear transcription factor Y subunit B-10; Short=OsNF-YB10; AltName: Full=Transcriptional activator HAP3F; Short=OsHAP3F [Oryza sativa Japonica Group] &gt;EEC82417.1 hypothetical protein OsI_26805 [Oryza sativa Indica Group] &gt;KAB8106292.1 hypothetical protein EE612_040570 [Oryza sativa] &gt;K…
NF-Ys	0	0	2.91772	2.58842	LOC4325336	LOC_Os01g08790	Os01g0183400	LOC_Os01g08790.1	tropomyosin [Oryza sativa Japonica Group] &gt;KAF2948783.1 hypothetical protein DAI22_01g059900 [Oryza sativa Japonica Group] &gt;BAD67789.1 hypothetical protein [Oryza sativa Japonica Group] &gt;BAF04140.1 Os01g0183400 [Oryza sativa Japonica Group] &gt;BAS70751.1 Os01g0183400 [Oryza sativa Japonica Group]
NF-Ys	0	0	1.94544	1.88626	LOC9266773	LOC_Os01g70890	Os01g0935200	LOC_Os01g70890.1	nuclear transcription factor Y subunit B-1 [Oryza sativa Japonica Group] &gt;XP_015635872.1 nuclear transcription factor Y subunit B-1 [Oryza sativa Japonica Group] &gt;KAB8085085.1 hypothetical protein EE612_007817 [Oryza sativa] &gt;EAZ14750.1 hypothetical protein OsJ_04677 [Oryza sativa Japonica Group] &gt;KAF2954189.1 hypothetical protein DAI22_01g462100 [Oryza sativa Japonica Group] &gt;BAB6…
NF-Ys	0	0	1.60544	1.66296	LOC4347894	LOC_Os09g39490	Os09g0568200	LOC_Os09g39490.1	NA
NF-Ys	0	0	-1.12032	-1.0887	LOC4352778	LOC_Os12g41880	Os12g0613000	LOC_Os12g41880.1;LOC_Os12g41880.2	nuclear transcription factor Y subunit A-7 isoform X1 [Oryza sativa Japonica Group] &gt;XP_052137884.1 nuclear transcription factor Y subunit A-7 isoform X1 [Oryza glaberrima] &gt;ABA99388.2 CCAAT-box transcription factor complex WHAP5, putative, expressed [Oryza sativa Japonica Group] &gt;KAF2908805.1 hypothetical protein DAI22_12g209800 [Oryza sativa Japonica Group]
NF-Ys	0	0	-1.51252	-1.38498	LOC4342440	LOC_Os07g06470	Os07g0158500	LOC_Os07g06470.1;LOC_Os07g06470.2	nuclear transcription factor Y subunit A-2 [Oryza sativa Japonica Group] &gt;KAF2921500.1 hypothetical protein DAI22_07g038400 [Oryza sativa Japonica Group]
NF-Ys	0	0	-1.26256	-1.53434	LOC4333105	LOC_Os03g29970	Os03g0413000	LOC_Os03g29970.1	NA
NF-Ys	0	0	-1.88638	-1.68969	LOC9266204	LOC_Os03g14669	Os03g0251350	LOC_Os03g14669.1;LOC_Os03g14669.2	nuclear transcription factor Y subunit C-2 [Oryza sativa Japonica Group] &gt;XP_015628320.1 nuclear transcription factor Y subunit C-2 [Oryza sativa Japonica Group] &gt;A6BLW4.1 RecName: Full=Nuclear transcription factor Y subunit C-2; Short=OsNF-YC2; AltName: Full=Transcriptional activator HAP5C; Short=OsHAP5C [Oryza sativa Japonica Group] &gt;KAB8091105.1 hypothetical protein EE612_016528 [Oryz…
NF-Ys	0	0	5.27605	0	LOC107278457	LOC_Os01g70880	Os01g0935100	LOC_Os01g70880.1	nuclear transcription factor Y subunit B-4 [Oryza sativa Japonica Group] &gt;KAF2954185.1 hypothetical protein DAI22_01g462000 [Oryza sativa Japonica Group]
NF-Ys	0	0	1.24952	0	LOC4339676	LOC_Os05g49780	Os05g0573500	LOC_Os05g49780.1	nuclear transcription factor Y subunit B-4 [Oryza sativa Japonica Group] &gt;Q65XK1.2 RecName: Full=Nuclear transcription factor Y subunit B-4; AltName: Full=OsNF-YB-4; AltName: Full=Transcriptional activator HAP3C [Oryza sativa Japonica Group] &gt;KAB8100682.1 hypothetical protein EE612_031264 [Oryza sativa] &gt;KAF2932217.1 hypothetical protein DAI22_05g271400 [Oryza sativa Japonica Group] &gt;…
NF-Ys	0	0	-2.38388	0	LOC4344784	LOC_Os08g07740	Os08g0174500	LOC_Os08g07740.1	nuclear transcription factor Y subunit B-11 [Oryza sativa Japonica Group] &gt;Q0J7P4.1 RecName: Full=Nuclear transcription factor Y subunit B-11; Short=OsNF-YB11; AltName: Full=Protein DAYS TO HEADING 8; AltName: Full=Protein HEADING DATE 5; AltName: Full=Transcriptional activator HAP3H; Short=OsHAP3H [Oryza sativa Japonica Group] &gt;KAB8107560.1 hypothetical protein EE612_042406 [Oryza sativa] …
CO-like	-1.77195	-2.58424	-3.30697	-4.33331	LOC4328490	LOC_Os02g08150	Os02g0178100	LOC_Os02g08150.1	zinc finger protein CONSTANS-LIKE 3 [Oryza sativa Japonica Group]
CO-like	0	-1.34434	-2.39331	-2.01958	LOC4344220	LOC_Os07g47140	Os07g0667300	LOC_Os07g47140.1	zinc finger protein CONSTANS-LIKE 13 isoform X1 [Oryza sativa Japonica Group] &gt;EAZ05064.1 hypothetical protein OsI_27253 [Oryza sativa Indica Group] &gt;KAB8106768.1 hypothetical protein EE612_041254 [Oryza sativa] &gt;KAF2924390.1 hypothetical protein DAI22_07g265600 [Oryza sativa Japonica Group] &gt;BAF22488.1 Os07g0667300 [Oryza sativa Japonica Group] &gt;BAG99873.1 unnamed protein product …
CO-like	0	1.65985	1.31747	2.0138	LOC4340812	LOC_Os06g19444	Os06g0298200	LOC_Os06g19444.1;LOC_Os06g19444.2	zinc finger protein CONSTANS-LIKE 9 isoform X1 [Oryza sativa Japonica Group] &gt;KAB8102188.1 hypothetical protein EE612_033522 [Oryza sativa] &gt;KAF2926398.1 hypothetical protein DAI22_06g124900 [Oryza sativa Japonica Group] &gt;BAG93782.1 unnamed protein product [Oryza sativa Japonica Group] &gt;BAS97360.1 Os06g0298200 [Oryza sativa Japonica Group]
CO-like	0	0	-1.20617	-2.24639	LOC4345073	LOC_Os08g15050	Os08g0249000	LOC_Os08g15050.1	zinc finger protein CONSTANS-LIKE 3 [Oryza sativa Japonica Group]
CO-like	0	0	-1.84844	-2.0902	LOC4336288	LOC_Os04g42020	Os04g0497700	LOC_Os04g42020.1	zinc finger protein CONSTANS-LIKE 3 [Oryza sativa Japonica Group] &gt;XP_052151021.1 zinc finger protein CONSTANS-LIKE 3-like [Oryza glaberrima] &gt;KAB8095943.1 hypothetical protein EE612_024202 [Oryza sativa] &gt;KAF2934731.1 hypothetical protein DAI22_04g184400 [Oryza sativa Japonica Group] &gt;CAE03116.2 OSJNBa0067K08.19 [Oryza sativa Japonica Group] &gt;BAF15122.1 Os04g0497700 [Oryza sativa …
CO-like	0	0	-1.67111	-2.05509	LOC9269795	LOC_Os06g44450	Os06g0654900	LOC_Os06g44450.1	zinc finger protein CONSTANS-LIKE 5 [Oryza sativa Japonica Group] &gt;KAF2927885.1 hypothetical protein DAI22_06g237800 [Oryza sativa Japonica Group]
CO-like	0	0	-1.7569	-1.16345	LOC4340698	LOC_Os06g15330	Os06g0264200	LOC_Os06g15330.1	NA
CO-like	0	0	-1.38744	-1.13454	LOC4333882	LOC_Os03g50310	Os03g0711100	LOC_Os03g50310.1	zinc finger protein CONSTANS-LIKE 16 [Oryza sativa Japonica Group] &gt;EAY91607.1 hypothetical protein OsI_13241 [Oryza sativa Indica Group] &gt;AAX95654.1 CCT motif, putative [Oryza sativa Japonica Group] &gt;ABF98509.1 CCT motif family protein, expressed [Oryza sativa Japonica Group] &gt;KAF2940946.1 hypothetical protein DAI22_03g311400 [Oryza sativa Japonica Group] &gt;BAF12967.1 Os03g0711100 …
CO-like	1.97461	0	1.68961	0	LOC4347535	LOC_Os09g33550	Os09g0509700	LOC_Os09g33550.1	NA
CO-like	0	2.22749	0	2.09448	LOC4347535	LOC_Os09g33550	Os09g0509700	LOC_Os09g33550.1	NA	CO-like
CO-like	0	1.24038	0	0	LOC4330574	LOC_Os02g49230	Os02g0724000	LOC_Os02g49230.1;LOC_Os02g49230.2;LOC_Os02g49230.3;LOC_Os02g49230.4;LOC_Os02g49230.5;LOC_Os02g49230.6	zinc finger protein CONSTANS-LIKE 9 isoform X1 [Oryza sativa Japonica Group] &gt;XP_015627428.1 zinc finger protein CONSTANS-LIKE 9 isoform X1 [Oryza sativa Japonica Group] &gt;XP_025878659.1 zinc finger protein CONSTANS-LIKE 9 isoform X1 [Oryza sativa Japonica Group] &gt;AGG54061.1 CONSTANS-like protein Days to heading on chromosome 2 [Oryza sativa Japonica Group] &gt;BAA33206.1 zinc finger prot…
LBD	2.66408	2.5756	1.81606	2.35637	LOC4324028	LOC_Os01g32770	Os01g0511000	LOC_Os01g32770.1
LBD	0	0	6.2308	5.9216	LOC4325972	LOC_Os01g03890	Os01g0129600	LOC_Os01g03890.1	LOB domain-containing protein 40 [Oryza sativa Japonica Group] &gt;EAZ10404.1 hypothetical protein OsJ_00237 [Oryza sativa Japonica Group] &gt;KAF2948224.1 hypothetical protein DAI22_01g020600 [Oryza sativa Japonica Group] &gt;BAB03390.1 putative seed specific protein Bn15D17A [Oryza sativa Japonica Group] &gt;BAF03832.1 Os01g0129600 [Oryza sativa Japonica Group]
LBD	0	0	2.50375	2.20887	LOC4325196	LOC_Os01g07480	Os01g0169400	LOC_Os01g07480.1;LOC_Os01g07480.2	protein LATERAL ORGAN BOUNDARIES [Oryza sativa Japonica Group] &gt;XP_025878847.1 protein LATERAL ORGAN BOUNDARIES [Oryza sativa Japonica Group] &gt;KAF2948631.1 hypothetical protein DAI22_01g048900 [Oryza sativa Japonica Group] &gt;BAB39926.1 P0028E10.30 [Oryza sativa Japonica Group] &gt;BAB92516.1 putative LOB domain protein 25 [Oryza sativa Japonica Group] &gt;BAD88527.1 LOB domain protein [Or…
LBD	-1.98915	0	-3.25256	-3.04747	LOC4331627	LOC_Os03g05500	Os03g0149000	LOC_Os03g05500.1	LOB domain-containing protein 16 [Oryza sativa Japonica Group] &gt;XP_052148504.1 LOB domain-containing protein 16-like [Oryza glaberrima] &gt;KAB8090201.1 hypothetical protein EE612_015322 [Oryza sativa] &gt;ABF93993.1 expressed protein [Oryza sativa Japonica Group] &gt;KAF2937295.1 hypothetical protein DAI22_03g039700 [Oryza sativa Japonica Group] &gt;BAD88524.1 LOB domain protein [Oryza sativa…
LBD	0	0	-1.37219	-1.14875	LOC4333430	LOC_Os03g41330	Os03g0609500	LOC_Os03g41330.1	LOB domain-containing protein 38 [Oryza sativa Japonica Group] &gt;KAB8092611.1 hypothetical protein EE612_018882 [Oryza sativa] &gt;AAR87344.1 hypothetical protein LOC_Os03g41330 [Oryza sativa Japonica Group] &gt;ABF97569.1 LOB domain protein 40, putative, expressed [Oryza sativa Japonica Group] &gt;KAF2940204.1 hypothetical protein DAI22_03g254100 [Oryza sativa Japonica Group] &gt;BAF12562.1 Os…
LBD	0	0	0	5.61527	LOC9266080	LOC_Os01g39070	Os01g0571800	LOC_Os01g39070.1	NA
LBD	0	0	0	2.48299	LOC4333227	LOC_Os03g33090	Os03g0445700	LOC_Os03g33090.1	LOB domain-containing protein 37 [Oryza sativa Japonica Group] &gt;XP_052146438.1 LOB domain-containing protein 37-like [Oryza glaberrima] &gt;KAB8092339.1 hypothetical protein EE612_018337 [Oryza sativa] &gt;AAT85783.1 expressed protein [Oryza sativa Japonica Group] &gt;ABF96901.1 LOB domain protein 37, putative, expressed [Oryza sativa Japonica Group] &gt;EAZ27464.1 hypothetical protein OsJ_114…
LBD	0	0	0	1.36528	LOC4333627	LOC_Os03g45750	Os03g0659700	LOC_Os03g45750.1	NA
LBD	0	0	0	-1.36942	LOC4332242	LOC_Os03g14270	Os03g0246900	LOC_Os03g14270.1	NA
LBD	0	0	0	-1.88533	LOC9266422	LOC_Os10g07510	Os10g0162600	LOC_Os10g07510.1	NA
LBD	0	1.82886	1.58299	0	LOC107278669	LOC_Os05g03160	Os05g0123000	LOC_Os05g03160.1	LOB domain-containing protein 1 [Oryza sativa Japonica Group] &gt;KAF2928907.1 hypothetical protein DAI22_05g017800 [Oryza sativa Japonica Group]
GATA	0	0	6.46468	6.2588	LOC4339709	LOC_Os05g50270	Os05g0578900	LOC_Os05g50270.1	NA
GATA	0	0	4.01104	3.93894	LOC107276441	LOC_Os05g49280	Os05g0567900	LOC_Os05g49280.1	NA
GATA	0	0	2.78773	2.69408	LOC9272543	LOC_Os01g47360	Os01g0662800	LOC_Os01g47360.1	GATA transcription factor 20 [Oryza sativa Japonica Group] &gt;KAF2951533.1 hypothetical protein DAI22_01g269700 [Oryza sativa Japonica Group] &gt;BAB91742.1 GATA-type zinc finger transcription factor-like [Oryza sativa Japonica Group] &gt;BAH91223.1 Os01g0662800 [Oryza sativa Japonica Group] &gt;BAS73549.1 Os01g0662800 [Oryza sativa Japonica Group]
GATA	0	0	1.68535	1.81881	LOC4327810	LOC_Os01g74540	Os01g0976800	LOC_Os01g74540.1	GATA transcription factor 16 [Oryza sativa Japonica Group] &gt;EEE56108.1 hypothetical protein OsJ_04967 [Oryza sativa Japonica Group] &gt;KAF2954581.1 hypothetical protein DAI22_01g493700 [Oryza sativa Japonica Group] &gt;BAD87039.1 zinc finger protein-like [Oryza sativa Japonica Group] &gt;BAF07484.2 Os01g0976800 [Oryza sativa Japonica Group] &gt;BAH01077.1 unnamed protein product [Oryza sativa…
GATA	0	0	1.86776	1.67849	LOC4326175	LOC_Os01g54210	Os01g0745700	LOC_Os01g54210.1	GATA transcription factor 12 [Oryza sativa Japonica Group] &gt;KAB8083481.1 hypothetical protein EE612_005685 [Oryza sativa] &gt;KAF2952243.1 hypothetical protein DAI22_01g322400 [Oryza sativa Japonica Group] &gt;BAC05593.1 putative AG-motif binding protein-4 [Oryza sativa Japonica Group] &gt;BAF06141.1 Os01g0745700 [Oryza sativa Japonica Group] &gt;BAS74314.1 Os01g0745700 [Oryza sativa Japonica …
GATA	0	0	1.67516	1.58201	LOC4349356	LOC_Os10g40810	Os10g0557600	LOC_Os10g40810.1	GATA transcription factor 2 [Oryza sativa Japonica Group] &gt;AAK55449.1 putative transcription factor [Oryza sativa Japonica Group] &gt;AAP54978.1 GATA zinc finger family protein, expressed [Oryza sativa Japonica Group] &gt;EAY79485.1 hypothetical protein OsI_34613 [Oryza sativa Indica Group] &gt;KAF2914772.1 hypothetical protein DAI22_10g188100 [Oryza sativa Japonica Group]
GATA	0	0	1.44941	1.34839	LOC4339348	LOC_Os05g44400	Os05g0520300	LOC_Os05g44400.1	GATA transcription factor 12 [Oryza sativa Japonica Group] &gt;EAY98730.1 hypothetical protein OsI_20661 [Oryza sativa Indica Group] &gt;KAB8100231.1 hypothetical protein EE612_030678 [Oryza sativa] &gt;AAT69661.1 unknown protein [Oryza sativa Japonica Group] &gt;AAU44269.1 unknown protein [Oryza sativa Japonica Group] &gt;KAF2931688.1 hypothetical protein DAI22_05g230100 [Oryza sativa Japonica G…
GATA	0	0	-1.31326	-1.3475	LOC4326489	LOC_Os01g24070	Os01g0343300	LOC_Os01g24070.1;LOC_Os01g24070.2	GATA transcription factor 23 [Oryza sativa Japonica Group] &gt;AOT80448.1 GATA transcription factor [Oryza sativa Indica Group] &gt;KAB8081307.1 hypothetical protein EE612_002394 [Oryza sativa] &gt;KAF2950006.1 hypothetical protein DAI22_01g159900 [Oryza sativa Japonica Group] &gt;BAB93299.1 unknown protein [Oryza sativa Japonica Group] &gt;BAF04873.1 Os01g0343300 [Oryza sativa Japonica Group]
GATA	0	0	-1.53395	-1.3826	LOC4334019	LOC_Os03g52450	Os03g0734900	LOC_Os03g52450.1;LOC_Os03g52450.2	GATA transcription factor 19 isoform X1 [Oryza sativa Japonica Group] &gt;Q0DNU1.2 RecName: Full=GATA transcription factor 19; Short=OsGATA19; AltName: Full=Protein TIFY 1b; Short=OsTIFY1b [Oryza sativa Japonica Group] &gt;KAB8093449.1 hypothetical protein EE612_020284 [Oryza sativa] &gt;EEE59877.1 hypothetical protein OsJ_12477 [Oryza sativa Japonica Group] &gt;KAF2941174.1 hypothetical protein …
Dof	-1.73124	-1.64469	-2.74674	-2.8489	LOC4331765	LOC_Os03g07360	Os03g0169600	LOC_Os03g07360.1	cyclic dof factor 1 [Oryza sativa Japonica Group] &gt;KAB8090401.1 hypothetical protein EE612_015572 [Oryza sativa] &gt;AAL84292.1 putative zinc finger DNA-binding protein [Oryza sativa Japonica Group] &gt;AAO72548.1 putative H-protein promoter binding factor-2a [Oryza sativa Japonica Group] &gt;ABF94195.1 Dof domain, zinc finger family protein, expressed [Oryza sativa Japonica Group] &gt;EAZ2573…
Dof	-1.11929	-1.28065	-1.7928	-2.03251	LOC4344326	LOC_Os07g48570	Os07g0685000	LOC_Os07g48570.1	NA
Dof	0	0	-1.6007	-1.30543	LOC4348585	LOC_Os10g26620	Os10g0406300	LOC_Os10g26620.1	cyclic dof factor 1 [Oryza sativa Japonica Group] &gt;ABB47574.1 Dof domain, zinc finger family protein, expressed [Oryza sativa Japonica Group] &gt;KAF2913514.1 hypothetical protein DAI22_10g091000 [Oryza sativa Japonica Group]
Dof	0	0	-1.51144	-1.14724	LOC9268074	LOC_Os09g29960	Os09g0475800	LOC_Os09g29960.1	dof zinc finger protein MNB1A [Oryza sativa Japonica Group] &gt;AGV39658.1 transcription factor Dof25 [Oryza sativa] &gt;KAB8110988.1 hypothetical protein EE612_048501 [Oryza sativa] &gt;BAD46375.1 putative DNA-binding protein [Oryza sativa Japonica Group] &gt;BAH94614.1 Os09g0475800 [Oryza sativa Japonica Group]
Dof	0	0	1.49894	1.23455	LOC4352574	LOC_Os12g38200	Os12g0569900	LOC_Os12g38200.1	dof zinc finger protein DOF5.1 isoform X1 [Oryza sativa Japonica Group] &gt;ABA99651.2 Dof domain, zinc finger family protein, expressed [Oryza sativa Japonica Group] &gt;KAF2908412.1 hypothetical protein DAI22_12g182800 [Oryza sativa Japonica Group] &gt;BAF30095.2 Os12g0569900 [Oryza sativa Japonica Group] &gt;BAT17729.1 Os12g0569900 [Oryza sativa Japonica Group]
Dof	0	0	3.59734	3.82947	LOC4334219	LOC_Os03g55610	Os03g0764900	LOC_Os03g55610.1	dof zinc finger protein 4-like [Oryza sativa Japonica Group] &gt;XP_052146879.1 dof zinc finger protein 4-like [Oryza glaberrima] &gt;KAB8093721.1 hypothetical protein EE612_020644 [Oryza sativa] &gt;ABF99035.1 Dof domain, zinc finger family protein, expressed [Oryza sativa Japonica Group] &gt;KAF2941482.1 hypothetical protein DAI22_03g350000 [Oryza sativa Japonica Group] &gt;BAF13286.1 Os03g0764…
Dof	0	0	1.06815	0	LOC4330470	LOC_Os02g47810	Os02g0707200	LOC_Os02g47810.1	dof zinc finger protein DOF3.1 [Oryza sativa Japonica Group] &gt;KAF2946687.1 hypothetical protein DAI22_02g303800 [Oryza sativa Japonica Group] &gt;KAF2946688.1 hypothetical protein DAI22_02g303800 [Oryza sativa Japonica Group]
Dof	0	0	-1.55174	0	LOC4330589	LOC_Os02g49440	Os02g0726300	LOC_Os02g49440.1	NA
Dof	0	0	1.04426	0	LOC4337599	LOC_Os05g02150	Os05g0112200	LOC_Os05g02150.1	dof zinc finger protein DOF3.6 isoform X1 [Oryza sativa Japonica Group] &gt;KAF2928796.1 hypothetical protein DAI22_05g010000 [Oryza sativa Japonica Group]
TCP	0	1.02516	1.05808	1.05862	LOC9271589	LOC_Os12g07480	Os12g0173300	LOC_Os12g07480.1	NA
TCP	0	0	1.54186	1.47018	LOC4325252	LOC_Os01g11550	Os01g0213800	LOC_Os01g11550.1	NA
TCP	0	0	1.81407	1.69243	LOC4330080	LOC_Os02g42380	Os02g0635800	LOC_Os02g42380.1	transcription factor TCP7 [Oryza sativa Japonica Group] &gt;KAB8088099.1 hypothetical protein EE612_012587 [Oryza sativa] &gt;KAF2946021.1 hypothetical protein DAI22_02g260500 [Oryza sativa Japonica Group] &gt;BAD25071.1 TCP family transcription factor-like [Oryza sativa Japonica Group] &gt;BAF09435.1 Os02g0635800 [Oryza sativa Japonica Group] &gt;BAG88012.1 unnamed protein product [Oryza sativa …
TCP	0	0	2.06049	1.72699	LOC4330722	LOC_Os02g51280	Os02g0747400	LOC_Os02g51280.1	transcription factor TCP14 [Oryza sativa Japonica Group] &gt;KAB8088908.1 hypothetical protein EE612_013682 [Oryza sativa] &gt;ADE62742.1 TCP transcription factor [Oryza sativa Japonica Group] &gt;KAF2946948.1 hypothetical protein DAI22_02g332600 [Oryza sativa Japonica Group] &gt;BAD16334.1 putative TCP-domain protein [Oryza sativa Japonica Group] &gt;BAD16444.1 putative TCP-domain protein [Oryza…
TCP	0	0	1.78878	1.51416	LOC4336452	LOC_Os04g44440	Os04g0526000	LOC_Os04g44440.1	transcription factor TCP21 [Oryza sativa Japonica Group] &gt;KAF2935014.1 hypothetical protein DAI22_04g202100 [Oryza sativa Japonica Group] &gt;BAF15275.1 Os04g0526000 [Oryza sativa Japonica Group] &gt;BAS90167.1 Os04g0526000 [Oryza sativa Japonica Group] &gt;CAE05645.2 OSJNBa0038O10.11 [Oryza sativa Japonica Group]
TCP	0	0	1.2367	1.11157	LOC4340553	LOC_Os06g12230	Os06g0226700	LOC_Os06g12230.1	transcription factor TCP15 [Oryza sativa Japonica Group] &gt;EAZ00231.1 hypothetical protein OsI_22238 [Oryza sativa Indica Group] &gt;KAB8101815.1 hypothetical protein EE612_032832 [Oryza sativa] &gt;KAF2925908.1 hypothetical protein DAI22_06g087600 [Oryza sativa Japonica Group] &gt;BAD37305.1 putative auxin-induced basic helix-loop-helix transcription [Oryza sativa Japonica Group] &gt;BAD37456.…
TCP	0	0	1.68457	1.62877	LOC4349919	LOC_Os11g07460	Os11g0175700	LOC_Os11g07460.1	NA
TCP	0	0	1.30531	0	LOC4334346	LOC_Os03g57190	Os03g0785800	LOC_Os03g57190.1	transcription factor PCF6 [Oryza sativa Japonica Group] &gt;Q10CE8.1 RecName: Full=Transcription factor PCF6 [Oryza sativa Japonica Group] &gt;ABF99227.1 TCP family transcription factor containing protein, expressed [Oryza sativa Japonica Group] &gt;KAF2941699.1 hypothetical protein DAI22_03g365600 [Oryza sativa Japonica Group] &gt;BAH01343.1 unnamed protein product [Oryza sativa Japonica Group] …
ZF-HD	1.81492	1.95794	1.99983	1.59644	LOC4347053	LOC_Os09g24810	Os09g0414500	LOC_Os09g24810.1	NA
ZF-HD	1.10565	0	1.28339	1.23485	LOC4347054	LOC_Os09g24820	Os09g0414600	LOC_Os09g24820.1	zinc-finger homeodomain protein 9 [Oryza sativa Japonica Group] &gt;Q6ER21.2 RecName: Full=Zinc-finger homeodomain protein 9; Short=OsZHD9 [Oryza sativa Japonica Group] &gt;KAF2916175.1 hypothetical protein DAI22_09g098600 [Oryza sativa Japonica Group]
ZF-HD	0	-1.57184	-2.67968	-3.62507	LOC9268901	LOC_Os01g44430	Os01g0635550	LOC_Os01g44430.1	zinc-finger homeodomain protein 5 [Oryza sativa Japonica Group] &gt;XP_015622497.1 zinc-finger homeodomain protein 5 [Oryza sativa Japonica Group] &gt;Q5VM82.1 RecName: Full=Zinc-finger homeodomain protein 5; Short=OsZHD5 [Oryza sativa Japonica Group] &gt;KAB8082612.1 hypothetical protein EE612_004556 [Oryza sativa] &gt;KAF2951337.1 hypothetical protein DAI22_01g254700 [Oryza sativa Japonica Grou…
ZF-HD	0	0	2.50726	2.37868	LOC4345845	LOC_Os08g37400	Os08g0479400	LOC_Os08g37400.1	zinc-finger homeodomain protein 2 [Oryza sativa Japonica Group] &gt;A2YWA6.1 RecName: Full=Zinc-finger homeodomain protein 2 [Oryza sativa Indica Group] &gt;Q6ZB90.1 RecName: Full=Zinc-finger homeodomain protein 2; Short=OsZHD2 [Oryza sativa Japonica Group] &gt;KAB8108891.1 hypothetical protein EE612_044928 [Oryza sativa] &gt;EAZ07367.1 hypothetical protein OsI_29618 [Oryza sativa Indica Group] &…
ZF-HD	0	0	1.96964	2.16733	LOC4335893	LOC_Os04g35500	Os04g0434500	LOC_Os04g35500.1	NA
ZF-HD	0	0	2.50395	1.9712	LOC9272708	LOC_Os03g50920	Os03g0718500	LOC_Os03g50920.1	zinc-finger homeodomain protein 11 [Oryza sativa Japonica Group] &gt;A2XLF4.1 RecName: Full=Zinc-finger homeodomain protein 11 [Oryza sativa Indica Group] &gt;Q10DV5.1 RecName: Full=Zinc-finger homeodomain protein 11; Short=OsZHD11 [Oryza sativa Japonica Group] &gt;KAB8093309.1 hypothetical protein EE612_020078 [Oryza sativa] &gt;ABF98569.1 ZF-HD protein dimerisation region containing protein, ex…
ZF-HD	0	0	1.48236	1.31437	LOC4347315	LOC_Os09g29130	Os09g0466400	LOC_Os09g29130.1	zinc-finger homeodomain protein 1 [Oryza sativa Japonica Group] &gt;Q6YXH5.1 RecName: Full=Zinc-finger homeodomain protein 1; Short=OsZHD1 [Oryza sativa Japonica Group] &gt;KAB8110915.1 hypothetical protein EE612_048391 [Oryza sativa] &gt;KAF2916595.1 hypothetical protein DAI22_09g131100 [Oryza sativa Japonica Group] &gt;BAD17515.1 putative ZF-HD homeobox protein [Oryza sativa Japonica Group] &gt…
ZF-HD	0	0	-2.0055	-1.58466	LOC4351766	LOC_Os12g10630	Os12g0208900	LOC_Os12g10630.1	zinc-finger homeodomain protein 3 [Oryza sativa Japonica Group] &gt;Q2QW44.3 RecName: Full=Zinc-finger homeodomain protein 3; Short=OsZHD3 [Oryza sativa Japonica Group]
C3H	0	0	1.57579	1.83147	LOC4348530	LOC_Os10g25220	Os10g0391300	LOC_Os10g25220.1	zinc finger CCCH domain-containing protein 62 [Oryza sativa Japonica Group] &gt;Q338N2.2 RecName: Full=Zinc finger CCCH domain-containing protein 62; Short=OsC3H62 [Oryza sativa Japonica Group] &gt;EEC66881.1 hypothetical protein OsI_33425 [Oryza sativa Indica Group] &gt;ABB47500.2 SAP domain containing protein, expressed [Oryza sativa Japonica Group] &gt;EEE50898.1 hypothetical protein OsJ_31392…
C3H	0	0	1.26479	1.23589	LOC9271204	LOC_Os04g01480	Os04g0105000	LOC_Os04g01480.1	zinc finger CCCH domain-containing protein 24 isoform X2 [Oryza sativa Japonica Group]
C3H	0	0	-1.48681	-1.32754	LOC4324354	LOC_Os01g68860	Os01g0917400	LOC_Os01g68860.1;LOC_Os01g68860.2;LOC_Os01g68860.3	NA
C3H	0	0	-1.21546	-1.09025	LOC4350492	LOC_Os11g28270	Os11g0472000	LOC_Os11g28270.1;LOC_Os11g28270.2;LOC_Os11g28270.3	zinc finger CCCH domain-containing protein 63 isoform X2 [Oryza sativa Japonica Group]
C3H	0	0	0	1.00678	LOC4341164	LOC_Os06g32860	Os06g0520600	LOC_Os06g32860.1;LOC_Os06g32860.2	zinc finger CCCH domain-containing protein 43 [Oryza sativa Japonica Group] &gt;XP_025882269.1 zinc finger CCCH domain-containing protein 43 [Oryza sativa Japonica Group] &gt;Q5Z5Q3.1 RecName: Full=Zinc finger CCCH domain-containing protein 43; Short=OsC3H43 [Oryza sativa Japonica Group] &gt;BAD62014.1 translation initiation factor eIF-4F isozyme form subunit p82-like [Oryza sativa Japonica Group…
C3H	0	0	-1.05107	0	LOC4352041	LOC_Os12g21700	Os12g0405100	LOC_Os12g21700.1	zinc finger CCCH domain-containing protein 66 isoform X1 [Oryza sativa Japonica Group] &gt;XP_052138647.1 zinc finger CCCH domain-containing protein 66 [Oryza glaberrima] &gt;Q2QT65.1 RecName: Full=Zinc finger CCCH domain-containing protein 66; Short=OsC3H66 [Oryza sativa Japonica Group] &gt;ABA97542.1 Zinc finger CCCH type domain containing protein ZFN, putative, expressed [Oryza sativa Japonica…
C3H	1.2054	1.378	0	0	LOC4337692	LOC_Os05g03760	Os05g0128200	LOC_Os05g03760.1	NA
GRAS	-1.05621	-1.42649	-1.84997	-2.47073	LOC107275984	LOC_Os06g01620	Os06g0105100	LOC_Os06g01620.1	scarecrow-like protein 6 [Oryza sativa Japonica Group] &gt;KAF2924750.1 hypothetical protein DAI22_06g002800 [Oryza sativa Japonica Group] &gt;KAF2924751.1 hypothetical protein DAI22_06g002800 [Oryza sativa Japonica Group] &gt;BAS95739.1 Os06g0105350 [Oryza sativa Japonica Group]
GRAS	0	0	2.24097	1.98832	LOC4343753	LOC_Os07g39820	Os07g0586900	LOC_Os07g39820.1	NA
GRAS	0	0	1.81415	1.70304	LOC107277905	LOC_Os12g04370	Os12g0138166	LOC_Os12g04370.1	scarecrow-like protein 3 [Oryza sativa Japonica Group]
GRAS	0	0	1.24153	1.22203	LOC4333948	LOC_Os03g51330	Os03g0723000	LOC_Os03g51330.1	NA
GRAS	0	0	-1.42903	-1.4152	LOC4351217	LOC_Os11g47870	Os11g0705200	LOC_Os11g47870.1	scarecrow-like protein 9 [Oryza sativa Japonica Group] &gt;AAX95274.1 GRAS family transcription factor, putative [Oryza sativa Japonica Group] &gt;ABA95512.1 GRAS family transcription factor containing protein, expressed [Oryza sativa Japonica Group] &gt;EAZ19321.1 hypothetical protein OsJ_34870 [Oryza sativa Japonica Group] &gt;KAF2912281.1 hypothetical protein DAI22_11g243300 [Oryza sativa Japo…
GRAS	0	0	-2.63638	-2.57492	LOC4339232	LOC_Os05g42130	Os05g0500600	LOC_Os05g42130.1	scarecrow-like protein 32 [Oryza sativa Japonica Group] &gt;KAB8100072.1 hypothetical protein EE612_030439 [Oryza sativa] &gt;AAT93866.1 unknown protein [Oryza sativa Japonica Group] &gt;AAU90224.1 unknown protein [Oryza sativa Japonica Group] &gt;KAF2931497.1 hypothetical protein DAI22_05g203000 [Oryza sativa Japonica Group] &gt;BAF17879.1 Os05g0500600 [Oryza sativa Japonica Group]
GRAS	0	0	-1.24092	0	LOC4331920	LOC_Os03g09280	Os03g0193000	LOC_Os03g09280.1;LOC_Os03g09280.2;LOC_Os03g09280.3	scarecrow-like protein 21 [Oryza sativa Japonica Group] &gt;XP_015630859.1 scarecrow-like protein 21 [Oryza sativa Japonica Group] &gt;XP_015630860.1 scarecrow-like protein 21 [Oryza sativa Japonica Group] &gt;XP_015630861.1 scarecrow-like protein 21 [Oryza sativa Japonica Group] &gt;XP_015630862.1 scarecrow-like protein 21 [Oryza sativa Japonica Group] &gt;XP_015630863.1 scarecrow-like protein 2…
MIKC-MADS	0	6.22463	6.10929	6.67387	LOC4341786	LOC_Os06g45650	Os06g0667200	LOC_Os06g45650.1	MADS-box transcription factor 30 isoform X1 [Oryza sativa Japonica Group]
MIKC-MADS	0	0	-1.22362	-1.1163	LOC4342047	LOC_Os06g49840	Os06g0712700	LOC_Os06g49840.1;LOC_Os06g49840.2	MADS-box transcription factor 16 [Oryza sativa Japonica Group] &gt;Q944S9.2 RecName: Full=MADS-box transcription factor 16; AltName: Full=OsMADS16; AltName: Full=Protein APETALA3-like; AltName: Full=Protein SUPERWOMAN1 [Oryza sativa Japonica Group] &gt;KAF2928457.1 hypothetical protein DAI22_06g280100 [Oryza sativa Japonica Group] &gt;BAA81881.1 MADS box-like protein [Oryza sativa Japonica Group]…
MIKC-MADS	0	0	-1.2835	-1.13792	LOC4330621	LOC_Os02g49840	Os02g0731200	LOC_Os02g49840.1;LOC_Os02g49840.2;LOC_Os02g49840.4;LOC_Os02g49840.3	MADS-box transcription factor 57 isoform X1 [Oryza sativa Japonica Group] &gt;XP_052143628.1 MADS-box transcription factor 57 isoform X1 [Oryza glaberrima]
MIKC-MADS	0	0	-1.16911	-1.21739	LOC4349237	LOC_Os10g39130	Os10g0536100	LOC_Os10g39130.1;LOC_Os10g39130.2	NA
MIKC-MADS	0	0	-3.79591	-3.74025	LOC4346135	LOC_Os08g41960	Os08g0531900	LOC_Os08g41960.1	MADS-box transcription factor 51-like isoform X1 [Oryza sativa Japonica Group]
MIKC-MADS	0	0	0	-1.70886	LOC4338067	LOC_Os05g11414	Os05g0203800	LOC_Os05g11414.1	MADS-box transcription factor 58 isoform X1 [Oryza sativa Japonica Group]
MIKC-MADS	0	0	0	2.76907	LOC4324731	LOC_Os01g52680	Os01g0726400	LOC_Os01g52680.1	MADS-box transcription factor 32 isoform X1 [Oryza sativa Japonica Group] &gt;XP_052140842.1 MADS-box transcription factor 32 [Oryza glaberrima] &gt;Q8S151.1 RecName: Full=MADS-box transcription factor 32; AltName: Full=OsMADS32 [Oryza sativa Japonica Group] &gt;ADW66552.1 chimeric floral organs 1 [Oryza sativa Indica Group] &gt;KAB8083309.1 hypothetical protein EE612_005461 [Oryza sativa] &gt;AA…
GeBP	0	0	1.55834	1.39054	LOC4323982	LOC_Os01g32890	Os01g0512400	LOC_Os01g32890.1	NA
GeBP	0	0	1.31671	1.28645	LOC4330871	LOC_Os02g53150	Os02g0771200	LOC_Os02g53150.1	probable tyrosine-protein phosphatase DSP2 [Oryza sativa Japonica Group]
GeBP	0	0	1.07835	1.38784	LOC9272499	LOC_Os03g25430	Os03g0370250	LOC_Os03g25430.1	NA
GeBP	0	0	1.43555	1.16279	LOC9269165	LOC_Os09g01470	Os09g0102300	LOC_Os09g01470.1	uncharacterized protein LOC9269165 [Oryza sativa Japonica Group]
GeBP	0	0	0	6.10525	LOC4327221	LOC_Os01g14720	Os01g0249900	LOC_Os01g14720.1	probable transcription factor At3g04930 [Oryza sativa Japonica Group]
GeBP	0	0	1.84916	0	LOC4346364	LOC_Os09g01140	Os09g0100800	LOC_Os09g01140.1	uncharacterized protein LOC4346364 isoform X1 [Oryza sativa Japonica Group] &gt;KAF2915042.1 hypothetical protein DAI22_09g001600 [Oryza sativa Japonica Group]
Trihelix	3.46821	2.98964	3.34625	3.28787	LOC4327270	LOC_Os01g21590	Os01g0318400	LOC_Os01g21590.1	NA
Trihelix	0	0	5.29347	5.61295	LOC9266435	LOC_Os04g57530	Os04g0670900	LOC_Os04g57530.1	NA
Trihelix	0	0	-1.68133	-1.67676	LOC4335704	LOC_Os04g32590	Os04g0397500	LOC_Os04g32590.1	trihelix transcription factor ASR3 [Oryza sativa Japonica Group] &gt;BAF14581.2 Os04g0397500 [Oryza sativa Japonica Group] &gt;CAE05151.2 OSJNBa0039C07.7 [Oryza sativa Japonica Group]
Trihelix	0	0	0	-1.08477	LOC4329479	LOC_Os02g31160	Os02g0516800	LOC_Os02g31160.1	trihelix transcription factor ASR3 [Oryza sativa Japonica Group]
Trihelix	0	0	0	3.90082	LOC107277135	LOC_Os03g46350	Os03g0666300	LOC_Os03g46350.1	trihelix transcription factor ASR3 [Oryza sativa Japonica Group] &gt;AAR87172.1 hypothetical protein [Oryza sativa Japonica Group] &gt;ABF98069.1 hypothetical protein LOC_Os03g46350 [Oryza sativa Japonica Group] &gt;KAF2940556.1 hypothetical protein DAI22_03g281200 [Oryza sativa Japonica Group]
Trihelix	0	0	1.01115	0	LOC4336540	LOC_Os04g45750	Os04g0541100	LOC_Os04g45750.1;LOC_Os04g45750.2	trihelix transcription factor GTL1 isoform X2 [Oryza sativa Japonica Group] &gt;EEC77725.1 hypothetical protein OsI_16822 [Oryza sativa Indica Group] &gt;KAF2935137.1 hypothetical protein DAI22_04g211200 [Oryza sativa Japonica Group] &gt;CAE02791.2 OSJNBa0011L07.15 [Oryza sativa Japonica Group] &gt;CAH67396.1 H0115B09.8 [Oryza sativa]
AP2	0	3.52858	5.05381	4.67833	LOC4334257	LOC_Os03g56050	Os03g0770700	LOC_Os03g56050.1	NA
AP2	0	0	6.80375	6.64025	LOC4329975	LOC_Os02g40070	Os02g0614300	LOC_Os02g40070.1	AP2-like ethylene-responsive transcription factor PLT2 [Oryza sativa Japonica Group]
AP2	0	0	-1.46051	-1.25043	LOC4334582	LOC_Os03g60430	Os03g0818800	LOC_Os03g60430.1;LOC_Os03g60430.2
AP2	0	0	-1.21689	-1.21379	LOC9269072	LOC_Os04g55560	Os04g0649100	LOC_Os04g55560.2;LOC_Os04g55560.3
AP2	0	0	0	-1.06249	LOC4337654	LOC_Os05g03040	Os05g0121600	LOC_Os05g03040.1;LOC_Os05g03040.2;LOC_Os05g03040.3	NA
GRF	0	0	2.99454	3.05667	LOC4330903	LOC_Os02g53690	Os02g0776900	LOC_Os02g53690.1	growth-regulating factor 1 [Oryza sativa Japonica Group] &gt;Q6AWY8.1 RecName: Full=Growth-regulating factor 1; Short=OsGRF1; AltName: Full=Transcription activator GRF1 [Oryza sativa Japonica Group] &gt;KAB8089146.1 hypothetical protein EE612_013997 [Oryza sativa] &gt;KAF2947229.1 hypothetical protein DAI22_02g354000 [Oryza sativa Japonica Group] &gt;BAF10202.1 Os02g0776900 [Oryza sativa Japonica…
GRF	0	0	2.32338	2.51952	LOC4330436	LOC_Os02g47280	Os02g0701300	LOC_Os02g47280.1;LOC_Os02g47280.2	NA
GRF	0	0	1.22947	1.35385	LOC4350711	LOC_Os11g35030	Os11g0551900	LOC_Os11g35030.1	growth-regulating factor 8 [Oryza sativa Japonica Group] &gt;Q6AWY1.1 RecName: Full=Growth-regulating factor 8; Short=OsGRF8; AltName: Full=Transcription activator GRF8 [Oryza sativa Japonica Group] &gt;ABA94244.2 expressed protein [Oryza sativa Japonica Group] &gt;KAF2911271.1 hypothetical protein DAI22_11g164300 [Oryza sativa Japonica Group] &gt;BAF28444.1 Os11g0551900 [Oryza sativa Japonica Gr…

## Sheet: Sheet2
Supplementary Table 9. The list of BPH-responsive transcription factors in all comparisons
Supplementary Table 9-2. The list of BPH-responsive transcription factors in R0 vs RT6
TF_anno	Family	log2FoldChange	pvalue	id	MSU	RAP	R0_1_TPM	R0_2_TPM	R0_3_TPM	RT6_1_TPM	RT6_2_TPM	RT6_3_TPM	padj	FC	direction	GO	KO	protein_cluster	GO_des	Nr_des
LOC_Os01g56690.1	bHLH	7.71502	0.0014305	LOC9269465	LOC_Os01g56690	Os01g0773800	0	0	0	1.83509	0	0.229788	0.0314469	210.113	up	NA	NA	5	NA	transcription factor BHLH148-like [Oryza sativa Japonica Group] &gt;XP_052140065.1 transcription factor BHLH148-like [Oryza glaberrima] &gt;KAF2952548.1 hypothetical protein DAI22_01g343400 [Oryza sativa Japonica Group]
LOC_Os05g07120.1;LOC_Os05g07120.2	bHLH	6.73826	0.000127689	LOC4337905	LOC_Os05g07120	Os05g0163900	0	0	0	0.269663	0.129975	0.181611	0.00456391	106.763	up	NA	NA	20	NA	putative transcription factor bHLH107 [Oryza sativa Japonica Group] &gt;XP_015638378.1 putative transcription factor bHLH107 [Oryza sativa Japonica Group] &gt;XP_015638379.1 putative transcription factor bHLH107 [Oryza sativa Japonica Group] &gt;KAB8098250.1 hypothetical protein EE612_027316 [Oryza sativa] &gt;AAT07662.1 unknown protein [Oryza sativa Japonica Group] &gt;AAT69620.1 unknown protein…
LOC_Os04g23550.1;LOC_Os04g23550.2	bHLH	6.39994	2.39e-07	LOC4335417	LOC_Os04g23550	Os04g0301500	2.88962	0.480913	0.317961	228.943	47.6627	34.1643	2.42e-05	84.4451	up	NA	NA	1	NA	NA
LOC_Os01g72370.1;LOC_Os01g72370.2;LOC_Os01g72370.3	bHLH	-4.75501	3.7e-09	LOC4325750	LOC_Os01g72370	Os01g0952800	6.27573	3.14776	13.9611	0.21501	0.020622	0.287106	6.01e-07	0.0370339	down	NA	NA	15	NA	protein IRON-RELATED TRANSCRIPTION FACTOR 2 isoform X1 [Oryza sativa Japonica Group] &gt;XP_052155250.1 protein IRON-RELATED TRANSCRIPTION FACTOR 2 isoform X1 [Oryza glaberrima] &gt;A2WZ60.1 RecName: Full=Protein IRON-RELATED TRANSCRIPTION FACTOR 2; Short=OsIRO2 [Oryza sativa Indica Group] &gt;EAY77256.1 hypothetical protein OsI_05230 [Oryza sativa Indica Group] &gt;EAZ14859.1 hypothetical protei…
LOC_Os03g53020.1	bHLH	4.12218	1.55e-17	LOC4334060	LOC_Os03g53020	Os03g0741100	2.66221	0.966891	2.10891	50.933	25.2875	24.1678	1.68e-14	17.414	up	NA	NA	5	NA	NA
LOC_Os01g50940.1	bHLH	2.75737	3.46e-07	LOC4327669	LOC_Os01g50940	Os01g0705700	1.81563	3.3577	2.37283	30.4139	11.0526	7.76194	3.21e-05	6.76165	up	NA	K25801	20	NA	transcription factor bHLH13 [Oryza sativa Japonica Group] &gt;EAZ13257.1 hypothetical protein OsJ_03182 [Oryza sativa Japonica Group] &gt;KAF2951888.1 hypothetical protein DAI22_01g295800 [Oryza sativa Japonica Group]
LOC_Os09g28210.1	bHLH	2.25428	1.29e-05	LOC4347252	LOC_Os09g28210	Os09g0455300	4.80989	1.50949	1.40088	11.3957	13.0213	13.8625	0.00070236	4.77097	up	GO:0005634;GO:0006355;GO:0140110	NA	5	nucleus; regulation of transcription, DNA-templated; transcription regulator activity	transcription factor HEC2 [Oryza sativa Japonica Group] &gt;XP_052168277.1 transcription factor HEC2-like [Oryza glaberrima] &gt;EAZ09361.1 hypothetical protein OsI_31634 [Oryza sativa Indica Group] &gt;KAF2916514.1 hypothetical protein DAI22_09g125000 [Oryza sativa Japonica Group] &gt;BAD38280.1 basic helix-loop-helix (bHLH)-like protein [Oryza sativa Japonica Group] &gt;BAD38453.1 basic helix-l…
LOC_Os01g39330.1	bHLH	1.92493	5.48e-09	LOC4326315	LOC_Os01g39330	Os01g0575200	1.24917	2.05291	1.42896	4.17367	8.07191	6.03516	8.5e-07	3.79719	up	GO:0005634;GO:0006355;GO:0140110	NA	5	nucleus; regulation of transcription, DNA-templated; transcription regulator activity	putative transcription factor bHLH041 [Oryza sativa Japonica Group] &gt;EEC70936.1 hypothetical protein OsI_02527 [Oryza sativa Indica Group] &gt;KAB8081965.1 hypothetical protein EE612_003634 [Oryza sativa] &gt;EEE54848.1 hypothetical protein OsJ_02312 [Oryza sativa Japonica Group] &gt;KAF2950848.1 hypothetical protein DAI22_01g216900 [Oryza sativa Japonica Group] &gt;BAB90265.1 basic helix-loop…
LOC_Os08g36740.1	bHLH	1.79327	0.000809593	LOC107278005	LOC_Os08g36740	Os08g0471401	2.90117	1.06634	0.827129	6.03144	5.08181	5.96285	0.0203051	3.466	up	NA	NA	5	NA	transcription factor HEC2 [Oryza sativa Japonica Group] &gt;XP_052165987.1 transcription factor HEC2-like [Oryza glaberrima] &gt;EAZ07311.1 hypothetical protein OsI_29558 [Oryza sativa Indica Group] &gt;EAZ43049.1 hypothetical protein OsJ_27638 [Oryza sativa Japonica Group] &gt;KAF2920074.1 hypothetical protein DAI22_08g183400 [Oryza sativa Japonica Group] &gt;BAD09865.1 bHLH protein family-like …
LOC_Os03g26210.1;LOC_Os03g26210.2;LOC_Os03g26210.3	bHLH	-1.70547	6.77e-10	LOC4332972	LOC_Os03g26210	Os03g0379300	17.3894	21.3226	28.1908	7.55169	6.44613	6.60838	1.39e-07	0.306622	down	NA	NA	12	NA	transcription factor BHLH062-like [Oryza sativa Japonica Group] &gt;XP_015633302.1 transcription factor BHLH062-like [Oryza sativa Japonica Group] &gt;Q10KL8.1 RecName: Full=Protein IRON-RELATED TRANSCRIPTION FACTOR 3; Short=OsIRO2; AltName: Full=Basic helix-loop-helix protein 63; Short=OsbHLH063; AltName: Full=Transcription factor BHLH063; AltName: Full=bHLH transcription factor bHLH063 [Oryza s…
LOC_Os07g43530.1;LOC_Os07g43530.2	bHLH	1.51474	0.000233947	LOC4343984	LOC_Os07g43530	Os07g0628500	10.4012	7.00735	6.25966	32.3143	14.4722	21.2103	0.00742208	2.85747	up	NA	NA	1	NA	transcription factor BHLH062-like [Oryza sativa Japonica Group] &gt;XP_015645393.1 transcription factor BHLH062-like [Oryza sativa Japonica Group] &gt;Q69V10.1 RecName: Full=Transcription factor BHLH062; AltName: Full=Basic helix-loop-helix protein 1; Short=OsbHLH1; AltName: Full=Basic helix-loop-helix protein 62; Short=OsbHLH062; AltName: Full=bHLH transcription factor bHLH062 [Oryza sativa Japo…
LOC_Os04g47080.1	bHLH	-1.39846	0.000261223	LOC4336636	LOC_Os04g47080	Os04g0557800	1.23742	2.49213	2.1558	0.748963	0.594329	0.876628	0.00813222	0.379335	down	NA	NA	17	NA	anthocyanin regulatory Lc protein isoform X4 [Oryza sativa Japonica Group] &gt;BAF15446.1 Os04g0557800 [Oryza sativa Japonica Group] &gt;BAS90447.1 Os04g0557800 [Oryza sativa Japonica Group] &gt;CAE03483.2 OSJNBa0065O17.8 [Oryza sativa Japonica Group]
LOC_Os04g28280.1	bHLH	1.30228	6.52e-08	LOC4335553	LOC_Os04g28280	Os04g0350700	7.42285	9.20164	10.5876	24.1152	23.5156	19.8419	8.02e-06	2.46618	up	GO:0009536	NA	5	plastid	NA
LOC_Os07g05010.1;LOC_Os07g05010.2;LOC_Os07g05010.3	bHLH	-1.07545	2.87e-05	LOC4342383	LOC_Os07g05010	Os07g0143200	39.954	31.9904	48.9233	20.5071	18.9679	17.8905	0.00136456	0.474523	down	NA	K16189	8	NA	transcription factor PHYTOCHROME INTERACTING FACTOR-LIKE 13-like isoform X1 [Oryza sativa Japonica Group] &gt;XP_015648044.1 transcription factor PHYTOCHROME INTERACTING FACTOR-LIKE 13-like isoform X1 [Oryza sativa Japonica Group] &gt;XP_015648045.1 transcription factor PHYTOCHROME INTERACTING FACTOR-LIKE 13-like isoform X1 [Oryza sativa Japonica Group] &gt;KAF2921402.1 hypothetical protein DAI22…
LOC_Os02g35660.1	bHLH	-1.02606	0.000344484	LOC4329698	LOC_Os02g35660	Os02g0564700	2.04987	2.59683	2.56858	1.27006	1.15224	1.13841	0.01031	0.49105	down	NA	NA	8	NA	transcription factor bHLH68 [Oryza sativa Japonica Group] &gt;KAB8087536.1 hypothetical protein EE612_011840 [Oryza sativa] &gt;EEE57212.1 hypothetical protein OsJ_07173 [Oryza sativa Japonica Group] &gt;KAF2945368.1 hypothetical protein DAI22_02g212400 [Oryza sativa Japonica Group] &gt;BAD15821.1 putative bHLH transcription factor PTF1 [Oryza sativa Japonica Group] &gt;BAH01152.1 unnamed protein…
LOC_Os03g20650.1	bZIP	-1.43402	2.87e-08	LOC107277499	LOC_Os03g20650	Os03g0322700	5.83038	8.0934	8.08594	2.23518	2.7002	3.3321	3.77e-06	0.370097	down	NA	K14432	17	NA	ABSCISIC ACID-INSENSITIVE 5-like protein 2 [Oryza sativa Japonica Group] &gt;XP_052149537.1 ABSCISIC ACID-INSENSITIVE 5-like protein 2 [Oryza glaberrima] &gt;KAF2939013.1 hypothetical protein DAI22_03g160500 [Oryza sativa Japonica Group]
LOC_Os03g32230.1	C2H2	5.04061	2.92e-12	LOC4333197	LOC_Os03g32230	Os03g0437200	0.398861	0.142803	0.13269	14.983	5.10991	3.32692	9.42e-10	32.9136	up	NA	NA	5	NA	zinc finger protein 36-like [Oryza sativa Japonica Group] &gt;Q75KE5.1 RecName: Full=Zinc finger protein 36; AltName: Full=Protein BROAD-SPECTRUM RESISTANCE DIGU 1 [Oryza sativa Japonica Group] &gt;EAY90588.1 hypothetical protein OsI_12190 [Oryza sativa Indica Group] &gt;KAB8092319.1 hypothetical protein EE612_018309 [Oryza sativa] &gt;AAR89021.1 C2H2-type zinc finger protein ZFP36 [Oryza sativa …
LOC_Os01g63980.1	C2H2	3.6061	0.00016797	LOC4325059	LOC_Os01g63980	Os01g0859100	0	0.085188	0.039577	0.673184	0.601753	0.469211	0.00568137	12.1771	up	NA	NA	5	NA	protein TRANSPARENT TESTA 1 [Oryza sativa Japonica Group] &gt;XP_052135727.1 protein TRANSPARENT TESTA 1-like [Oryza glaberrima] &gt;KAB8084387.1 hypothetical protein EE612_006944 [Oryza sativa] &gt;KAF2953409.1 hypothetical protein DAI22_01g406900 [Oryza sativa Japonica Group] &gt;BAF06778.1 Os01g0859100 [Oryza sativa Japonica Group] &gt;BAG89073.1 unnamed protein product [Oryza sativa Japonica …
LOC_Os03g60570.1	C2H2	3.30923	6.94e-05	LOC4334593	LOC_Os03g60570	Os03g0820400	1.23893	0.363769	0.08422	8.16245	3.77896	4.93962	0.00280205	9.91236	up	NA	NA	5	NA	zinc finger protein ZAT12 [Oryza sativa Japonica Group] &gt;ABY66164.1 zinc finger protein [Oryza sativa Indica Group] &gt;KAB8094208.1 hypothetical protein EE612_021330 [Oryza sativa] &gt;AAO65858.1 putative Cys2/His2 zinc-finger protein [Oryza sativa Japonica Group] &gt;AAP42460.1 zinc finger protein ZFP15 [Oryza sativa Japonica Group] &gt;AAP74356.1 C2H2 type zinc finger transcription factor Z…
LOC_Os03g60560.1	C2H2	2.10683	0.000800195	LOC4334592	LOC_Os03g60560	Os03g0820300	1.9784	0.679622	0.598816	6.64196	2.59548	5.09632	0.0201933	4.30743	up	GO:0009536	NA	5	plastid	zinc finger protein ZAT12 [Oryza sativa Japonica Group] &gt;EAY92365.1 hypothetical protein OsI_14094 [Oryza sativa Indica Group] &gt;KAB8094207.1 hypothetical protein EE612_021325 [Oryza sativa] &gt;AAO65881.1 putative Cys2/His2 zinc-finger protein [Oryza sativa Japonica Group] &gt;AAP42461.1 zinc finger protein ZFP182 [Oryza sativa Japonica Group] &gt;ABF99585.1 Zinc finger, C2H2 type family pr…
LOC_Os03g55540.1	C2H2	2.03181	1.41e-05	LOC4334213	LOC_Os03g55540	Os03g0764100	59.4602	30.9103	24.1299	236.047	108.497	124.313	0.000753876	4.08917	up	NA	NA	5	NA	zinc finger protein 1 [Oryza sativa Japonica Group] &gt;AAK01713.1 zinc finger transcription factor ZF1 [Oryza sativa Indica Group] &gt;KAB8093711.1 hypothetical protein EE612_020626 [Oryza sativa] &gt;AAL34135.1 zinc finger transcription factor ZF1 [Oryza sativa Japonica Group] &gt;ABF99028.1 Zinc-finger protein 1, putative, expressed [Oryza sativa Japonica Group] &gt;EAY91956.1 hypothetical pro…
LOC_Os05g03760.1	C3H	1.2054	0.00166884	LOC4337692	LOC_Os05g03760	Os05g0128200	57.9341	26.5792	37.3645	119.728	73.2747	92.0185	0.0355233	2.30601	up	NA	NA	5	NA	NA
LOC_Os09g33550.1	CO-like	1.97461	1.53e-09	LOC4347535	LOC_Os09g33550	Os09g0509700	5.23349	4.13038	2.76249	18.3863	14.6859	15.0097	2.82e-07	3.93021	up	NA	NA	4	NA	NA
LOC_Os02g08150.1	CO-like	-1.77195	0.000139073	LOC4328490	LOC_Os02g08150	Os02g0178100	24.1723	8.08218	26.241	6.4217	6.27591	4.78744	0.00488084	0.292813	down	NA	NA	17	NA	zinc finger protein CONSTANS-LIKE 3 [Oryza sativa Japonica Group]
LOC_Os04g41560.2;LOC_Os04g41560.4	DBB	-1.48035	1.25e-05	LOC4336260	LOC_Os04g41560	Os04g0493000	247.764	141.027	321.776	83.5847	81.7254	95.1864	0.000683408	0.358402	down	GO:0003677;GO:0005622;GO:0008270	NA	17	DNA binding; intracellular; zinc ion binding	NA
LOC_Os01g10580.1	DBB	1.01082	0.000160679	LOC4327073	LOC_Os01g10580	Os01g0202500	7.89396	7.96966	8.27279	15.5532	20.888	12.7395	0.00549026	2.01506	up	NA	NA	4	NA	B-box zinc finger protein 22 [Oryza sativa Japonica Group] &gt;BAF04241.1 Os01g0202500 [Oryza sativa Japonica Group]
LOC_Os03g07360.1	Dof	-1.73124	2.48e-08	LOC4331765	LOC_Os03g07360	Os03g0169600	59.3101	36.2675	60.4775	18.1252	15.2463	14.2347	3.32e-06	0.301192	down	GO:0003677	NA	17	DNA binding	cyclic dof factor 1 [Oryza sativa Japonica Group] &gt;KAB8090401.1 hypothetical protein EE612_015572 [Oryza sativa] &gt;AAL84292.1 putative zinc finger DNA-binding protein [Oryza sativa Japonica Group] &gt;AAO72548.1 putative H-protein promoter binding factor-2a [Oryza sativa Japonica Group] &gt;ABF94195.1 Dof domain, zinc finger family protein, expressed [Oryza sativa Japonica Group] &gt;EAZ2573…
LOC_Os07g48570.1	Dof	-1.11929	7.31e-06	LOC4344326	LOC_Os07g48570	Os07g0685000	45.9029	31.7242	43.3485	19.2471	18.0875	19.3194	0.00043653	0.460322	down	NA	NA	8	NA	NA
LOC_Os07g48630.1;LOC_Os07g48630.2	EIL	1.28437	1.44e-08	LOC4344331	LOC_Os07g48630	Os07g0685700	50.1228	46.4631	46.0969	133.143	99.8403	117.083	2.01e-06	2.43576	up	NA	K14514	5	NA	ETHYLENE INSENSITIVE 3-like 1 protein [Oryza sativa Japonica Group] &gt;Q8W3L9.2 RecName: Full=Protein ETHYLENE-INSENSITIVE 3-like 2; Short=EIN3-like protein 2; Short=OsEIL2 [Oryza sativa Japonica Group] &gt;ADX60245.1 EIL transcription factor, partial [Oryza sativa Japonica Group] &gt;EEE67841.1 hypothetical protein OsJ_25629 [Oryza sativa Japonica Group] &gt;KAF2924581.1 hypothetical protein DA…
LOC_Os01g73770.1	ERF	9.91368	1.22e-11	LOC4323832	LOC_Os01g73770	Os01g0968800	0	0	0	6.8983	2.25331	1.19957	3.49e-09	964.527	up	NA	K09286	1	NA	NA
LOC_Os02g54050.1	ERF	8.40124	2.34e-07	LOC107278604	LOC_Os02g54050	Os02g0781300	0	0	0	1.491	0.300872	0.305866	2.39e-05	338.085	up	NA	K09286	1	NA	ethylene-responsive transcription factor ERF018 [Oryza sativa Japonica Group] &gt;KAB8089185.1 hypothetical protein EE612_014055 [Oryza sativa] &gt;KAF2947262.1 hypothetical protein DAI22_02g356900 [Oryza sativa Japonica Group] &gt;BAS81220.1 Os02g0781300 [Oryza sativa Japonica Group]
LOC_Os11g06770.1;LOC_Os11g06770.2	ERF	7.40767	4.06e-06	LOC4349881	LOC_Os11g06770	Os11g0168500	0	0	0	0.409886	0.797095	0.335712	0.000264186	169.797	up	NA	K09286	1	NA	ethylene-responsive transcription factor ERF110 [Oryza sativa Japonica Group] &gt;AAX93016.1 AP2 domain, putative [Oryza sativa Japonica Group] &gt;AAX96475.1 unknown protein; contains similarity to AP2 domain transcription factor gene_id:MPF21.9 [Oryza sativa Japonica Group] &gt;ABA91589.1 AP2 domain containing protein, expressed [Oryza sativa Japonica Group] &gt;KAF2909699.1 hypothetical protei…
LOC_Os07g47790.1;LOC_Os07g47790.2	ERF	6.87739	4.85e-05	LOC4344266	LOC_Os07g47790	Os07g0674800	0	0	0	0.483972	0.33547	0.430874	0.00209989	117.571	up	NA	K09286	5	NA	ethylene-responsive transcription factor RAP2-3 [Oryza sativa Japonica Group] &gt;EAZ05119.1 hypothetical protein OsI_27312 [Oryza sativa Indica Group] &gt;KAF2924485.1 hypothetical protein DAI22_07g271800 [Oryza sativa Japonica Group] &gt;BAC83539.1 AP2 domain transcription factor EREBP [Oryza sativa Japonica Group] &gt;BAD31975.1 AP2 domain transcription factor EREBP [Oryza sativa Japonica Grou…
LOC_Os09g35030.1	ERF	5.63389	6.35e-07	LOC4347620	LOC_Os09g35030	Os09g0522200	1.87257	0.54788	0.076707	63.5044	30.0138	33.1199	5.35e-05	49.6558	up	NA	K09286	5	NA	NA
LOC_Os09g35010.1	ERF	5.3921	1.84e-17	LOC4347618	LOC_Os09g35010	Os09g0522000	1.13406	0.234337	0.216529	25.7591	14.8156	27.8215	1.83e-14	41.9937	up	NA	K09286	5	NA	dehydration-responsive element-binding protein 1B, partial [Oryza sativa Japonica Group]
LOC_Os09g35020.1	ERF	5.22378	2.23e-12	LOC4347619	LOC_Os09g35020	Os09g0522100	0.245318	0.073535	0.068327	7.02147	1.8857	5.50333	7.47e-10	37.3692	up	GO:0009536	K09286	5	plastid	dehydration-responsive element-binding protein 1H [Oryza sativa Japonica Group] &gt;KAF2917129.1 hypothetical protein DAI22_09g169500 [Oryza sativa Japonica Group] &gt;BAD46703.1 putative CBF3-like protein [Oryza sativa Japonica Group]
LOC_Os02g45450.1	ERF	4.48605	1.43e-17	LOC4330306	LOC_Os02g45450	Os02g0677300	0.51304	0.122673	0.225691	4.60571	7.45883	8.29472	1.62e-14	22.4098	up	NA	K09286	5	NA	dehydration-responsive element-binding protein 1G [Oryza sativa Japonica Group] &gt;Q6EP77.1 RecName: Full=Dehydration-responsive element-binding protein 1G; Short=Protein DREB1G [Oryza sativa Japonica Group] &gt;KAB8088403.1 hypothetical protein EE612_012995 [Oryza sativa] &gt;EAZ24170.1 hypothetical protein OsJ_07915 [Oryza sativa Japonica Group] &gt;KAF2946341.1 hypothetical protein DAI22_02g2…
LOC_Os06g03670.1	ERF	4.06182	2.5e-05	LOC4339974	LOC_Os06g03670	Os06g0127100	0.541642	0.72876	0	6.91566	4.00761	10.3974	0.00121924	16.7005	up	NA	K09286	5	NA	dehydration-responsive element-binding protein 1C [Oryza sativa Japonica Group] &gt;A2Y8S6.1 RecName: Full=Dehydration-responsive element-binding protein 1C; Short=Protein DREB1C; AltName: Full=Protein C-repeat-binding factor 1 [Oryza sativa Indica Group] &gt;Q9LWV3.1 RecName: Full=Dehydration-responsive element-binding protein 1C; Short=Protein DREB1C; AltName: Full=Protein C-repeat-binding fact…
LOC_Os02g43790.1	ERF	3.93102	9.83e-10	LOC4330189	LOC_Os02g43790	Os02g0654700	6.08771	0.88774	1.64264	56.8295	46.9684	31.4039	1.89e-07	15.253	up	GO:0003700;GO:0005634;GO:0006355	K09286	5	DNA-binding transcription factor activity; nucleus; regulation of transcription, DNA-templated	NA
LOC_Os04g48350.1	ERF	3.85444	4.24e-12	LOC4336721	LOC_Os04g48350	Os04g0572400	1.16805	0.477018	0.273	11.9565	6.48089	9.73319	1.33e-09	14.4645	up	NA	K09286	5	NA	dehydration-responsive element-binding protein 1E [Oryza sativa Japonica Group] &gt;XP_052153133.1 dehydration-responsive element-binding protein 1E [Oryza glaberrima] &gt;A2XWL6.1 RecName: Full=Dehydration-responsive element-binding protein 1E; Short=Protein DREB1E [Oryza sativa Indica Group] &gt;Q8H273.1 RecName: Full=Dehydration-responsive element-binding protein 1E; Short=Protein DREB1E [Oryz…
LOC_Os01g21120.1	ERF	3.69822	2.75e-22	LOC4327287	LOC_Os01g21120	Os01g0313300	4.10435	2.88543	3.70072	65.6954	40.8755	32.2518	6.22e-19	12.98	up	NA	K09286	9	NA	ethylene-responsive transcription factor ERF071 [Oryza sativa Japonica Group] &gt;KAB8081166.1 hypothetical protein EE612_002120 [Oryza sativa] &gt;KAF2949845.1 hypothetical protein DAI22_01g146800 [Oryza sativa Japonica Group] &gt;BAB92777.1 putative ethylene response factor 2 [Oryza sativa Japonica Group] &gt;BAF04782.1 Os01g0313300 [Oryza sativa Japonica Group] &gt;BAG99412.1 unnamed protein p…
LOC_Os07g22730.1	ERF	3.51615	0.000734717	LOC9266984	LOC_Os07g22730	Os07g0410300	0.088849	0	0.073993	0.889338	0.774872	0.678457	0.0189327	11.4411	up	NA	K09286	4	NA	ethylene-responsive transcription factor 15 [Oryza sativa Japonica Group] &gt;XP_052163223.1 ethylene-responsive transcription factor 15-like [Oryza glaberrima] &gt;EAZ03592.1 hypothetical protein OsI_25728 [Oryza sativa Indica Group] &gt;KAF2922423.1 hypothetical protein DAI22_07g112350 [Oryza sativa Japonica Group]
LOC_Os01g64790.1	ERF	3.26749	2.64e-07	LOC4325050	LOC_Os01g64790	Os01g0868000	0.804154	0.414105	0.807617	8.79813	8.98286	1.78515	2.58e-05	9.6297	up	NA	K09286	1	NA	ethylene-responsive transcription factor ABR1 [Oryza sativa Japonica Group] &gt;KAF2953508.1 hypothetical protein DAI22_01g412900 [Oryza sativa Japonica Group]
LOC_Os02g45420.1	ERF	2.87575	1.3e-07	LOC9270349	LOC_Os02g45420	Os02g0676800	0.0624	0.243782	0.2362	1.4232	1.12316	1.46793	1.41e-05	7.33985	up	NA	K09286	5	NA	ethylene-responsive transcription factor ERF027 [Oryza sativa Japonica Group] &gt;KAB8088402.1 hypothetical protein EE612_012989 [Oryza sativa] &gt;BAD29233.1 putative DRE binding factor 2 [Oryza sativa Japonica Group] &gt;BAD29539.1 putative DRE binding factor 2 [Oryza sativa Japonica Group] &gt;BAH01466.1 unnamed protein product [Oryza sativa Japonica Group] &gt;BAH91841.1 Os02g0676800 [Oryza s…
LOC_Os04g46220.1	ERF	2.32892	5.63e-06	LOC4336571	LOC_Os04g46220	Os04g0546800	12.9916	5.15579	5.29013	54.2984	44.1219	20.3105	0.000352102	5.02428	up	NA	K09286	5	NA	ethylene-responsive transcription factor 2 [Oryza sativa Japonica Group] &gt;KAB8096335.1 hypothetical protein EE612_024741 [Oryza sativa] &gt;ABK34954.1 development related ERF protein [Oryza sativa Japonica Group] &gt;KAF2935190.1 hypothetical protein DAI22_04g214700 [Oryza sativa Japonica Group] &gt;CAD41472.3 OSJNBa0079A21.16 [Oryza sativa Japonica Group] &gt;BAF15388.1 Os04g0546800 [Oryza sa…
LOC_Os02g52670.1	ERF	2.31618	0.000976762	LOC4330829	LOC_Os02g52670	Os02g0764700	1.40797	0.884499	0.340174	7.6312	2.14123	3.20323	0.0234564	4.98012	up	NA	K09286	5	NA	ethylene-responsive transcription factor ERF109 [Oryza sativa Japonica Group] &gt;KAB8089042.1 hypothetical protein EE612_013856 [Oryza sativa] &gt;EAZ24725.1 hypothetical protein OsJ_08495 [Oryza sativa Japonica Group] &gt;KAF2947110.1 hypothetical protein DAI22_02g344700 [Oryza sativa Japonica Group] &gt;BAD17116.1 AP2 domain-containing transcription factor-like [Oryza sativa Japonica Group] &g…
LOC_Os03g08500.1;LOC_Os03g08500.2	ERF	1.53303	1.15e-06	LOC4331848	LOC_Os03g08500	Os03g0183300	105.575	58.4478	61.5262	233.228	218.477	213.686	8.91e-05	2.89393	up	NA	K09286	5	NA	ethylene-responsive transcription factor ERF073 [Oryza sativa Japonica Group] &gt;AAV98703.1 BTH-induced ERF transcriptional factor 4 [Oryza sativa Indica Group] &gt;AAK92632.1 Putative EREBP-like protein [Oryza sativa Japonica Group] &gt;ABF94333.1 AP2 domain containing protein, expressed [Oryza sativa Japonica Group] &gt;ACJ74069.1 AP2/ERF domain protein [Oryza sativa Japonica Group] &gt;ADR669…
LOC_Os05g41780.1	ERF	1.46513	6.43e-05	LOC4339209	LOC_Os05g41780	Os05g0497300	56.4681	40.0518	31.5557	158.288	84.7334	111.873	0.00261718	2.76088	up	NA	K09286	5	NA	ethylene-responsive transcription factor 4 [Oryza sativa Japonica Group] &gt;XP_052157498.1 ethylene-responsive transcription factor 4-like [Oryza glaberrima] &gt;AAT10384.1 ethylene-responsive element binding factor [Oryza sativa] &gt;EAY98556.1 hypothetical protein OsI_20469 [Oryza sativa Indica Group] &gt;AAT07584.1 putative ethylene-responsive element binding factor [Oryza sativa Japonica Gro…
LOC_Os03g60120.1	ERF	-1.27913	0.000361632	LOC4334558	LOC_Os03g60120	Os03g0815800	137.73	128.83	163.569	84.6116	38.8262	52.9118	0.0107091	0.412045	down	NA	K09286	17	NA	ethylene-responsive transcription factor CRF5 [Oryza sativa Japonica Group] &gt;KAB8094167.1 hypothetical protein EE612_021266 [Oryza sativa] &gt;AAO60030.1 putative AP2 domain containing protein [Oryza sativa Japonica Group] &gt;AAR01751.1 putative AP2 domain transcription factor [Oryza sativa Japonica Group] &gt;ABF99541.1 AP2 domain containing protein, expressed [Oryza sativa Japonica Group] &…
LOC_Os09g11480.1;LOC_Os09g11480.2	ERF	1.12762	0.000183243	LOC4346629	LOC_Os09g11480	Os09g0287000	20.4522	13.499	14.175	31.8466	45.5852	29.9129	0.00612642	2.18499	up	NA	K09286	5	NA	ethylene-responsive transcription factor 1-like [Oryza sativa Japonica Group] &gt;KAB8109959.1 hypothetical protein EE612_046607 [Oryza sativa] &gt;ACJ74072.1 AP2/ERF domain protein [Oryza sativa Japonica Group] &gt;EAZ44075.1 hypothetical protein OsJ_28694 [Oryza sativa Japonica Group] &gt;KAF2915475.1 hypothetical protein DAI22_09g036766 [Oryza sativa Japonica Group] &gt;BAD29170.1 ethylene res…
LOC_Os06g07030.1	ERF	1.10855	3.69e-05	LOC4340244	LOC_Os06g07030	Os06g0166400	8.07086	6.57064	6.81847	15.3666	18.4881	13.0749	0.00167679	2.15629	up	NA	K09286	4	NA	ethylene-responsive transcription factor RAP2-9 [Oryza sativa Japonica Group] &gt;KAF2925381.1 hypothetical protein DAI22_06g047700 [Oryza sativa Japonica Group] &gt;BAD67600.1 putative AP2 domain containing protein RAP2.1 [Oryza sativa Japonica Group] &gt;BAD67863.1 putative AP2 domain containing protein RAP2.1 [Oryza sativa Japonica Group] &gt;BAF18828.1 Os06g0166400 [Oryza sativa Japonica Grou…
LOC_Os01g74020.1	G2-like	2.1484	1.28e-07	LOC4326391	LOC_Os01g74020	Os01g0971800	6.66009	4.74793	2.42745	23.4061	19.9251	18.7713	1.4e-05	4.43336	up	NA	NA	4	NA	NA
LOC_Os02g22020.1	G2-like	-1.74663	8.7e-15	LOC4329184	LOC_Os02g22020	Os02g0325600	17.6517	24.2527	25.8179	6.88373	6.40094	7.01824	4.91e-12	0.297998	down	NA	NA	17	NA	transcription factor NIGT1 [Oryza sativa Japonica Group] &gt;XP_052141907.1 transcription factor NIGT1 [Oryza glaberrima] &gt;Q6Z869.1 RecName: Full=Transcription factor NIGT1; AltName: Full=MYB-domain transcription factor NIGT1; AltName: Full=Protein NITRATE-INDUCIBLE GARP-TYPE TRANSCRIPTIONAL REPRESSOR 1 [Oryza sativa Japonica Group] &gt;KAB8087068.1 hypothetical protein EE612_010868 [Oryza sat…
LOC_Os05g40960.1	G2-like	-1.22616	5.54e-07	LOC4339151	LOC_Os05g40960	Os05g0488600	24.6575	18.4472	20.0508	8.59551	8.28246	10.6709	4.76e-05	0.427455	down	NA	NA	8	NA	myb-related protein 2 isoform X1 [Oryza sativa Japonica Group] &gt;XP_015640414.1 myb-related protein 2 isoform X1 [Oryza sativa Japonica Group] &gt;XP_015640415.1 myb-related protein 2 isoform X1 [Oryza sativa Japonica Group] &gt;KAB8099957.1 hypothetical protein EE612_030294 [Oryza sativa] &gt;EEE64175.1 hypothetical protein OsJ_19007 [Oryza sativa Japonica Group] &gt;KAF2931371.1 hypothetical …
LOC_Os06g24070.1	G2-like	-1.14134	5.93e-05	LOC4340977	LOC_Os06g24070	Os06g0348800	108.201	84.4582	134.681	36.2812	52.4882	64.1313	0.00247104	0.453338	down	NA	NA	17	NA	NA
LOC_Os03g55590.1;LOC_Os03g55590.3;LOC_Os03g55590.4	G2-like	1.13331	0.000504942	LOC4334216	LOC_Os03g55590	Os03g0764600	40.4279	23.2468	39.0024	81.8389	86.3941	60.5089	0.0141839	2.19362	up	NA	NA	1	NA	NA
LOC_Os06g49040.1	G2-like	-1.125	0.000284293	LOC4341990	LOC_Os06g49040	Os06g0703900	95.7047	72.9109	82.9167	50.0347	29.1423	36.6375	0.00875109	0.458503	down	NA	NA	17	NA	protein PHOSPHATE STARVATION RESPONSE 3-like [Oryza sativa Japonica Group] &gt;KAB8103762.1 hypothetical protein EE612_036357 [Oryza sativa] &gt;EEE66318.1 hypothetical protein OsJ_22555 [Oryza sativa Japonica Group] &gt;KAF2928359.1 hypothetical protein DAI22_06g273100 [Oryza sativa Japonica Group] &gt;BAD54045.1 putative transfactor [Oryza sativa Japonica Group] &gt;BAF20417.1 Os06g0703900 [Ory…
LOC_Os07g48596.1	G2-like	-1.0021	9.96e-05	LOC4344327	LOC_Os07g48596	Os07g0685300	11.227	8.92959	11.2881	3.99234	5.79506	6.30734	0.00378137	0.499274	down	NA	NA	17	NA	myb-related protein 1 isoform X1 [Oryza sativa Japonica Group] &gt;XP_052160854.1 myb-related protein 1-like isoform X1 [Oryza glaberrima] &gt;KAF2924572.1 hypothetical protein DAI22_07g277500 [Oryza sativa Japonica Group]
LOC_Os06g01620.1	GRAS	-1.05621	0.00260971	LOC107275984	LOC_Os06g01620	Os06g0105100	6.0394	6.6946	8.76076	4.10168	3.92391	2.31318	0.048555	0.480892	down	NA	NA	8	NA	scarecrow-like protein 6 [Oryza sativa Japonica Group] &gt;KAF2924750.1 hypothetical protein DAI22_06g002800 [Oryza sativa Japonica Group] &gt;KAF2924751.1 hypothetical protein DAI22_06g002800 [Oryza sativa Japonica Group] &gt;BAS95739.1 Os06g0105350 [Oryza sativa Japonica Group]
LOC_Os06g10600.1	HD-ZIP	1.58611	0.000101021	LOC4340445	LOC_Os06g10600	Os06g0208100	7.97375	24.4083	13.663	28.5937	58.8897	52.0078	0.0038254	3.00239	up	NA	K09338	9	NA	NA
LOC_Os03g53340.1;LOC_Os03g53340.2;LOC_Os03g53340.3;LOC_Os03g53340.6	HSF	6.13948	1.33e-10	LOC4334080	LOC_Os03g53340	Os03g0745000	0.03891	0.05449	0	4.68592	1.25338	0.992741	3.19e-08	70.4967	up	NA	K09419	5	NA	NA
LOC_Os08g43334.1;LOC_Os08g43334.2	HSF	2.68087	2.26e-14	LOC4346229	LOC_Os08g43334	Os08g0546800	3.13013	2.36463	2.30946	22.4351	14.168	13.4547	1.04e-11	6.41244	up	NA	K09419	5	NA	heat stress transcription factor B-2b isoform X1 [Oryza sativa Japonica Group] &gt;AAQ23056.1 heat shock factor RHSF2 [Oryza sativa Japonica Group] &gt;BAF24337.1 Os08g0546800 [Oryza sativa Japonica Group]
LOC_Os09g35790.1;LOC_Os09g35790.2;LOC_Os09g35790.3	HSF	2.26173	1.86e-06	LOC4347637	LOC_Os09g35790	Os09g0526600	10.1206	9.18536	8.22227	75.1568	31.7583	22.5085	0.000138561	4.79568	up	NA	K09419	5	NA	heat stress transcription factor B-2c isoform X6 [Oryza sativa Japonica Group]
LOC_Os04g48030.1	HSF	2.05792	3.75e-13	LOC4336701	LOC_Os04g48030	Os04g0568700	3.65781	5.00671	5.30537	23.3405	16.7102	18.1442	1.43e-10	4.16387	up	NA	K09419	5	NA	NA
LOC_Os02g13800.1	HSF	-1.71115	3.2e-07	LOC4328809	LOC_Os02g13800	Os02g0232000	13.3192	14.7266	21.1694	3.31897	4.95772	7.17409	3.03e-05	0.305416	down	NA	K09419	8	NA	NA
LOC_Os01g43590.1;LOC_Os01g43590.2	HSF	-1.36995	0.000350057	LOC4326685	LOC_Os01g43590	Os01g0625300	3.17181	2.20197	3.67949	1.26263	1.28355	0.998739	0.0104141	0.386905	down	NA	K09419	8	NA	NA
LOC_Os01g32770.1	LBD	2.66408	8.19e-12	LOC4324028	LOC_Os01g32770	Os01g0511000	30.882	30.3124	13.8486	207.754	125.195	141.386	2.45e-09	6.33825	up	NA	NA	5	NA	LOB domain-containing protein 40 [Oryza sativa Japonica Group] &gt;KAB8081614.1 hypothetical protein EE612_002990 [Oryza sativa] &gt;KAF2950407.1 hypothetical protein DAI22_01g184000 [Oryza sativa Japonica Group]
LOC_Os03g05500.1	LBD	-1.98915	2.98e-05	LOC4331627	LOC_Os03g05500	Os03g0149000	2.0594	2.94951	4.29988	0.919375	0.736842	0.692276	0.00140891	0.251887	down	NA	NA	8	NA	LOB domain-containing protein 16 [Oryza sativa Japonica Group] &gt;XP_052148504.1 LOB domain-containing protein 16-like [Oryza glaberrima] &gt;KAB8090201.1 hypothetical protein EE612_015322 [Oryza sativa] &gt;ABF93993.1 expressed protein [Oryza sativa Japonica Group] &gt;KAF2937295.1 hypothetical protein DAI22_03g039700 [Oryza sativa Japonica Group] &gt;BAD88524.1 LOB domain protein [Oryza sativa…
LOC_Os08g06280.1;LOC_Os08g06280.2;LOC_Os08g06280.3;LOC_Os08g06280.4;LOC_Os08g06280.7;LOC_Os08g06280.8;LOC_Os08g06280.9	LSD	-1.11443	2.61e-07	LOC4344713	LOC_Os08g06280	Os08g0159500	159.858	145.265	182.932	63.3349	77.6414	92.9322	2.57e-05	0.461873	down	NA	NA	17	NA	protein LSD1 isoform X2 [Oryza sativa Japonica Group]
LOC_Os05g37060.1	MYB	9.65736	9.73e-11	LOC4338925	LOC_Os05g37060	Os05g0442400	0	0	0	5.16034	2.1929	0.716806	2.39e-08	807.526	up	NA	NA	1	NA	transcription factor DIVARICATA [Oryza sativa Japonica Group] &gt;EAY98215.1 hypothetical protein OsI_20126 [Oryza sativa Indica Group] &gt;KAB8099626.1 hypothetical protein EE612_029785 [Oryza sativa] &gt;AAT69605.1 putative myb-like transcription factor [Oryza sativa Japonica Group] &gt;AAU90097.1 putative myb-like transcription factor [Oryza sativa Japonica Group] &gt;EEE63882.1 hypothetical p…
LOC_Os01g64360.1	MYB	4.73432	2.84e-18	LOC4324783	LOC_Os01g64360	Os01g0863300	1.2744	1.2021	0.723802	50.7649	16.9478	15.9624	3.72e-15	26.6177	up	NA	NA	5	NA	transcription factor DIVARICATA [Oryza sativa Japonica Group] &gt;EAZ14242.1 hypothetical protein OsJ_04166 [Oryza sativa Japonica Group] &gt;KAF2953455.1 hypothetical protein DAI22_01g409600 [Oryza sativa Japonica Group]
LOC_Os02g40530.1	MYB	2.96166	6.86e-06	LOC4330001	LOC_Os02g40530	Os02g0618400	0.384083	0.468222	0.523868	6.41808	1.13959	3.074	0.000417638	7.79018	up	NA	K09422	5	NA	transcription factor MYB57 [Oryza sativa Japonica Group] &gt;EAZ23831.1 hypothetical protein OsJ_07548 [Oryza sativa Japonica Group] &gt;BAD21458.1 putative MYB transcription factor [Oryza sativa Japonica Group] &gt;BAD21600.1 putative MYB transcription factor [Oryza sativa Japonica Group] &gt;BAF09363.1 Os02g0618400 [Oryza sativa Japonica Group] &gt;BAG99431.1 unnamed protein product [Oryza sati…
LOC_Os02g09480.1	MYB	2.6291	1.49e-08	LOC4328551	LOC_Os02g09480	Os02g0187700	2.81584	7.07445	3.62427	12.0314	35.9165	37.4941	2.07e-06	6.18641	up	NA	K09422	9	NA	NA
LOC_Os04g43680.1	MYB	2.08034	6.32e-11	LOC4336407	LOC_Os04g43680	Os04g0517100	8.9919	14.1829	7.17694	50.3277	37.5034	39.8002	1.62e-08	4.22906	up	NA	K09422	5	NA	NA
LOC_Os06g43090.1	MYB	2.05223	3.71e-30	LOC4341607	LOC_Os06g43090	Os06g0637500	17.52	24.1037	19.9186	74.0342	86.7595	97.8724	1.54e-26	4.14748	up	NA	K09422	5	NA	NA
LOC_Os02g41510.1	MYB	2.00107	3.79e-05	LOC4330027	LOC_Os02g41510	Os02g0624300	0.544317	0.437941	0.4774	2.2965	2.20746	1.45798	0.00171901	4.00298	up	NA	K09422	5	NA	transcription factor MYB30-like [Oryza sativa Japonica Group] &gt;XP_052145300.1 transcription factor MYB30 [Oryza glaberrima] &gt;Q6K1S6.1 RecName: Full=Transcription factor MYB30; Short=OsMYB30 [Oryza sativa Japonica Group] &gt;EAY86754.1 hypothetical protein OsI_08134 [Oryza sativa Indica Group] &gt;KAB8088012.1 hypothetical protein EE612_012406 [Oryza sativa] &gt;EAZ23866.1 hypothetical prote…
LOC_Os12g37970.1;LOC_Os12g37970.2;LOC_Os12g37970.3	MYB	-1.66487	5.95e-06	LOC4352559	LOC_Os12g37970	Os12g0567300	105.939	69.8775	147.972	42.1698	24.407	39.6015	0.000369797	0.315373	down	NA	K09422	17	NA	myb-related protein MYBAS2 isoform X1 [Oryza sativa Japonica Group]
LOC_Os11g47460.1;LOC_Os11g47460.2;LOC_Os11g47460.3;LOC_Os11g47460.4	MYB	-1.59716	0.000189657	LOC4351184	LOC_Os11g47460	Os11g0700500	17.7026	7.9803	18.2941	5.67202	3.51724	5.76179	0.00628169	0.330528	down	NA	K09422	8	NA	NA
LOC_Os05g35500.1	MYB	1.09009	0.000123092	LOC9266213	LOC_Os05g35500	Os05g0429900	11.1406	18.4292	11.422	30.3091	32.6883	24.156	0.00443793	2.12888	up	NA	K09422	5	NA	transcription factor MYB8 [Oryza sativa Japonica Group] &gt;EAY98145.1 hypothetical protein OsI_20061 [Oryza sativa Indica Group] &gt;KAB8099544.1 hypothetical protein EE612_029670 [Oryza sativa] &gt;AAV59423.1 putative myb protein [Oryza sativa Japonica Group] &gt;ACF60464.1 myb transcription factor [Oryza sativa Japonica Group] &gt;KAF2930905.1 hypothetical protein DAI22_05g170500 [Oryza sativa…
LOC_Os01g65370.1	MYB	1.00261	0.000347775	LOC4324770	LOC_Os01g65370	Os01g0874300	34.3657	32.3943	37.4142	87.1058	53.9298	68.3217	0.0103586	2.00363	up	NA	K09422	5	NA	myb-related protein 308 [Oryza sativa Japonica Group] &gt;XP_052141309.1 myb-related protein 308-like [Oryza glaberrima] &gt;EAY76672.1 hypothetical protein OsI_04627 [Oryza sativa Indica Group] &gt;KAB8084534.1 hypothetical protein EE612_007117 [Oryza sativa] &gt;EAZ14337.1 hypothetical protein OsJ_04260 [Oryza sativa Japonica Group] &gt;KAF2953584.1 hypothetical protein DAI22_01g418000 [Oryza s…
LOC_Os05g07010.1;LOC_Os05g07010.2	MYB_related	5.58298	1.78e-05	LOC9266268	LOC_Os05g07010	Os05g0162800	0.191545	0	0	5.43635	3.31702	0.719591	0.000926665	47.9341	up	NA	NA	1	NA	NA
LOC_Os02g46030.1	MYB_related	-2.371	0.00123994	LOC4330349	LOC_Os02g46030	Os02g0685200	0.812701	0.348883	1.24209	0.225426	0.067153	0.152313	0.0284419	0.193312	down	NA	NA	12	NA	protein REVEILLE 1 isoform X1 [Oryza sativa Japonica Group]
LOC_Os08g06110.2;LOC_Os08g06110.3;LOC_Os08g06110.4;LOC_Os08g06110.5	MYB_related	-2.13735	3.1e-07	LOC4344703	LOC_Os08g06110	Os08g0157600	40.6147	38.6697	106.887	14.0907	13.4932	16.2079	2.97e-05	0.227298	down	NA	K12133	17	NA	protein LHY isoform X1 [Oryza sativa Japonica Group] &gt;XP_015649836.1 protein LHY isoform X1 [Oryza sativa Japonica Group] &gt;XP_015649837.1 protein LHY isoform X1 [Oryza sativa Japonica Group] &gt;XP_025875636.1 protein LHY isoform X1 [Oryza sativa Japonica Group] &gt;XP_025875637.1 protein LHY isoform X1 [Oryza sativa Japonica Group] &gt;XP_025875638.1 protein LHY isoform X1 [Oryza sativa Ja…
LOC_Os05g50340.1	MYB_related	-1.84787	0.000874123	LOC4339715	LOC_Os05g50340	Os05g0579600	8.85675	4.72796	11.8342	3.33584	2.55555	1.14754	0.0214933	0.277802	down	GO:0005739	NA	17	mitochondrion	protein RADIALIS-like 3 [Oryza sativa Japonica Group] &gt;XP_052156390.1 protein RADIALIS-like 3 [Oryza glaberrima] &gt;EAY99166.1 hypothetical protein OsI_21125 [Oryza sativa Indica Group] &gt;KAB8100737.1 hypothetical protein EE612_031331 [Oryza sativa] &gt;EEE64813.1 hypothetical protein OsJ_19669 [Oryza sativa Japonica Group] &gt;KAF2932287.1 hypothetical protein DAI22_05g276100 [Oryza sativa…
LOC_Os10g41260.1	MYB_related	-1.06082	0.000548076	LOC4349391	LOC_Os10g41260	Os10g0562100	144.866	88.2212	131.513	68.9902	49.7057	58.3678	0.0151275	0.479359	down	NA	NA	8	NA	NA
LOC_Os03g60080.1	NAC	4.02428	9.69e-15	LOC4334553	LOC_Os03g60080	Os03g0815100	21.0368	6.97953	7.43477	285.072	158.172	139.124	5.26e-12	16.2716	up	NA	NA	5	NA	NA
LOC_Os01g60020.1	NAC	2.48097	2.98e-10	LOC4327485	LOC_Os01g60020	Os01g0816100	1.49499	1.70885	2.90049	14.6301	10.5786	8.99959	6.66e-08	5.58272	up	NA	NA	5	NA	NA
LOC_Os07g12340.1	NAC	2.40349	3.47e-07	LOC4342753	LOC_Os07g12340	Os07g0225300	10.7314	5.70282	5.86824	61.863	31.345	24.4111	3.21e-05	5.29083	up	NA	NA	5	NA	NAC domain-containing protein 67 [Oryza sativa Japonica Group] &gt;XP_052160972.1 NAC domain-containing protein 67 [Oryza glaberrima] &gt;Q7EZT1.1 RecName: Full=NAC domain-containing protein 67; Short=ONAC067; AltName: Full=OsNAC3 [Oryza sativa Japonica Group] &gt;KAB8104814.1 hypothetical protein EE612_037977 [Oryza sativa] &gt;KAF2922014.1 hypothetical protein DAI22_07g078500 [Oryza sativa Japo…
LOC_Os03g01870.1	NAC	-2.36098	0.00215151	LOC4331342	LOC_Os03g01870	Os03g0109000	1.317	1.03413	1.81143	0.33344	0.054362	0.425716	0.0426542	0.194659	down	NA	NA	8	NA	NAC transcription factor 32 [Oryza sativa Japonica Group] &gt;KAB8089820.1 hypothetical protein EE612_014837 [Oryza sativa] &gt;ABF93571.1 NAC-domain containing protein 21/22, putative, expressed [Oryza sativa Japonica Group] &gt;EAZ25307.1 hypothetical protein OsJ_09117 [Oryza sativa Japonica Group] &gt;KAF2936851.1 hypothetical protein DAI22_03g008700 [Oryza sativa Japonica Group] &gt;BAF10619.…
LOC_Os05g34830.1;LOC_Os05g34830.2;LOC_Os05g34830.3	NAC	2.05758	0.000210617	LOC4338832	LOC_Os05g34830	Os05g0421600	3.76849	1.3525	3.415	19.5749	8.64977	7.28429	0.00682129	4.16288	up	NA	NA	5	NA	NAC domain-containing protein 48-like [Oryza sativa Japonica Group] &gt;AAT44250.1 putative no apical meristem (NAM) protein [Oryza sativa Japonica Group] &gt;KAF2930844.1 hypothetical protein DAI22_05g165700 [Oryza sativa Japonica Group]
LOC_Os01g66120.1;LOC_Os01g66120.3	NAC	1.67545	0.000518811	LOC4325006	LOC_Os01g66120	Os01g0884300	26.8215	12.042	22.7601	104.296	53.0785	38.8892	0.0145133	3.1942	up	NA	NA	5	NA	NAC domain-containing protein 48 [Oryza sativa Japonica Group] &gt;Q7F2L3.1 RecName: Full=NAC domain-containing protein 48; Short=ONAC048; AltName: Full=OsNAC6; AltName: Full=Protein STRESS-RESPONSIVE NAC 2 [Oryza sativa Japonica Group] &gt;KAB8084629.1 hypothetical protein EE612_007216 [Oryza sativa] &gt;AAK17067.1 NAC6 [Oryza sativa Japonica Group] &gt;ACJ54897.1 NAC6 protein [Oryza sativa Japo…
LOC_Os09g37710.1;LOC_Os09g37710.2	Nin-like	-1.10394	1.84e-06	LOC9268032	LOC_Os09g37710	Os09g0549450	13.7955	14.158	15.355	6.76526	5.4927	8.43326	0.000137631	0.465243	down	NA	NA	8	NA	protein NLP1-like isoform X1 [Oryza sativa Japonica Group] &gt;KAF2917403.1 hypothetical protein DAI22_09g188700 [Oryza sativa Japonica Group]
LOC_Os01g21590.1	Trihelix	3.46821	9.49e-07	LOC4327270	LOC_Os01g21590	Os01g0318400	0.93796	1.23765	0.696358	22.8631	4.38783	3.0969	7.53e-05	11.0672	up	NA	NA	20	NA	NA
LOC_Os06g44010.1	WRKY	5.56137	0.000865105	LOC4341678	LOC_Os06g44010	Os06g0649000	0.371654	0	0.239774	21.7942	3.95745	3.0413	0.0213422	47.2214	up	NA	NA	1	NA	WRKY transcription factor WRKY28-like [Oryza sativa Japonica Group]
LOC_Os01g60600.1	WRKY	4.49735	5.56e-16	LOC9268836	LOC_Os01g60600	Os01g0821300	0.580734	0.731065	0.647522	27.4778	7.69525	8.20493	3.83e-13	22.5859	up	NA	NA	5	NA	probable WRKY transcription factor 4 [Oryza sativa Japonica Group] &gt;KAF2953040.1 hypothetical protein DAI22_01g380700 [Oryza sativa Japonica Group] &gt;BAB85299.1 WRKY transcription factor 64-like protein [Oryza sativa Japonica Group] &gt;BAB86480.1 WRKY transcription factor 64-like protein [Oryza sativa Japonica Group] &gt;BAH91359.1 Os01g0821300 [Oryza sativa Japonica Group]
LOC_Os02g08440.1;LOC_Os02g08440.2;LOC_Os02g08440.3;LOC_Os02g08440.4	WRKY	3.86652	5.13e-11	LOC4328512	LOC_Os02g08440	Os02g0181300	14.4192	3.11513	4.59663	161.692	75.02	91.3034	1.33e-08	14.5861	up	GO:0003700;GO:0005634;GO:0006355;GO:0006952;GO:0009685;GO:0043565	NA	5	DNA-binding transcription factor activity; nucleus; regulation of transcription, DNA-templated; defense response; gibberellin metabolic process; sequence-specific DNA binding	NA
LOC_Os05g46020.1	WRKY	2.83906	3.89e-06	LOC4339451	LOC_Os05g46020	Os05g0537100	2.67469	0.83501	2.4077	25.4119	7.86024	8.92215	0.000256134	7.15554	up	NA	NA	5	NA	probable WRKY transcription factor 50 [Oryza sativa Japonica Group] &gt;ABC02807.1 WRKY transcription factor 7 [Oryza sativa] &gt;AAT39221.1 unknown protein, contains WRKY DNA -binding domain [Oryza sativa Japonica Group] &gt;EEE64508.1 hypothetical protein OsJ_19359 [Oryza sativa Japonica Group] &gt;KAB8100367.1 hypothetical protein EE612_030876 [Oryza sativa] &gt;KAF2931846.1 hypothetical prote…
LOC_Os01g61080.1	WRKY	2.75385	9.18e-06	LOC4327518	LOC_Os01g61080	Os01g0826400	0.325601	0.069918	0.237149	1.7225	1.38119	1.32442	0.000521793	6.74515	up	GO:0003677	K13424	5	DNA binding	NA
LOC_Os05g27730.1	WRKY	2.49111	5.74e-07	LOC4338474	LOC_Os05g27730	Os05g0343400	28.8514	8.24089	13.4317	131.9	73.8123	82.9771	4.92e-05	5.62212	up	NA	K13424	5	NA	WRKY transcription factor WRKY24 isoform X1 [Oryza sativa Japonica Group]
LOC_Os05g25770.1	WRKY	2.4298	9.65e-06	LOC4338413	LOC_Os05g25770	Os05g0322900	39.4303	11.4973	24.4287	225.098	85.6651	96.1228	0.000547346	5.38819	up	NA	NA	5	NA	probable WRKY transcription factor 70 [Oryza sativa Japonica Group] &gt;Q5W6D6.1 RecName: Full=Transcription factor WRKY45-1; Short=OsWRKY45-1; AltName: Full=OsWRKY45; AltName: Full=WRKY transcription factor 45-2 [Oryza sativa Japonica Group] &gt;AAV44133.1 putative WRKY transcription factor [Oryza sativa Japonica Group] &gt;AAV44172.1 putative WRKY transcription factor [Oryza sativa Japonica Gro…
LOC_Os01g60640.1	WRKY	2.36986	1.09e-07	LOC4327611	LOC_Os01g60640	Os01g0821600	20.7867	11.6603	8.74269	94.4726	41.769	78.9541	1.25e-05	5.16893	up	NA	NA	5	NA	probable WRKY transcription factor 30 [Oryza sativa Japonica Group] &gt;KAB8084069.1 hypothetical protein EE612_006524 [Oryza sativa] &gt;KAF2953042.1 hypothetical protein DAI22_01g381100 [Oryza sativa Japonica Group] &gt;BAB85303.1 WRKY transcription factor 48-like protein [Oryza sativa Japonica Group] &gt;BAB86484.1 WRKY transcription factor 48-like protein [Oryza sativa Japonica Group] &gt;BAF…
LOC_Os09g25060.1	WRKY	2.02364	1.18e-05	LOC4347069	LOC_Os09g25060	Os09g0417600	9.49008	7.02416	10.3205	58.29	18.2672	31.7522	0.000648011	4.06609	up	NA	NA	5	NA	WRKY transcription factor WRKY76 [Oryza sativa Japonica Group] &gt;Q6EPZ2.1 RecName: Full=WRKY transcription factor WRKY76; Short=OsWRKY76 [Oryza sativa Japonica Group] &gt;EAZ44747.1 hypothetical protein OsJ_29378 [Oryza sativa Japonica Group] &gt;BAD29278.1 putative WIZZ [Oryza sativa Japonica Group] &gt;BAF25098.1 Os09g0417600 [Oryza sativa Japonica Group] &gt;BAG87246.1 unnamed protein produc…
LOC_Os05g49620.1	WRKY	1.61415	0.000670541	LOC4339665	LOC_Os05g49620	Os05g0571200	0.860707	2.91218	2.68237	6.01478	7.90583	5.8439	0.0176637	3.06132	up	NA	NA	5	NA	probable WRKY transcription factor 41 [Oryza sativa Japonica Group] &gt;Q0DFT7.1 RecName: Full=Transcription factor WRKY19; Short=OsWRKY19; AltName: Full=WRKY transcription factor 19 [Oryza sativa Japonica Group] &gt;ADX60272.1 bHLH transcription factor, partial [Oryza sativa Japonica Group] &gt;EEE64756.1 hypothetical protein OsJ_19612 [Oryza sativa Japonica Group] &gt;KAF2932202.1 hypothetical …
LOC_Os09g16510.1	WRKY	1.54048	0.00134946	LOC4346768	LOC_Os09g16510	Os09g0334500	6.49385	2.40124	4.82449	19.254	9.12332	11.9074	0.0300646	2.90891	up	NA	NA	5	NA	probable WRKY transcription factor 30 [Oryza sativa Japonica Group] &gt;AAT84161.1 transcription factor WRKY74 [Oryza sativa Indica Group] &gt;KAB8110132.1 hypothetical protein EE612_047066 [Oryza sativa] &gt;EAZ44315.1 hypothetical protein OsJ_28937 [Oryza sativa Japonica Group] &gt;KAF2915707.1 hypothetical protein DAI22_09g059400 [Oryza sativa Japonica Group] &gt;BAD28444.1 WRKY family transcr…
LOC_Os01g14440.1	WRKY	1.48433	0.00232017	LOC4326760	LOC_Os01g14440	Os01g0246700	4.17115	2.09291	4.62813	15.9027	6.49769	7.99914	0.0449573	2.79787	up	GO:0003677	NA	5	DNA binding	NA
LOC_Os05g09020.1;LOC_Os05g09020.2	WRKY	1.24278	7.55e-06	LOC4337998	LOC_Os05g09020	Os05g0183100	32.9514	27.2449	23.134	78.3638	56.5011	63.7663	0.000448738	2.36654	up	NA	NA	5	NA	NA
LOC_Os09g24810.1	ZF-HD	1.81492	3.52e-06	LOC4347053	LOC_Os09g24810	Os09g0414500	10.0479	16.8749	8.13795	30.4912	62.1874	31.7544	0.000236105	3.5184	up	GO:0005739	NA	9	mitochondrion	NA
LOC_Os09g24820.1	ZF-HD	1.10565	5.04e-06	LOC4347054	LOC_Os09g24820	Os09g0414600	4.64596	4.14187	3.47274	7.88406	10.7935	8.14799	0.000321991	2.15196	up	NA	NA	20	NA	zinc-finger homeodomain protein 9 [Oryza sativa Japonica Group] &gt;Q6ER21.2 RecName: Full=Zinc-finger homeodomain protein 9; Short=OsZHD9 [Oryza sativa Japonica Group] &gt;KAF2916175.1 hypothetical protein DAI22_09g098600 [Oryza sativa Japonica Group]

## Sheet: Sheet3
Supplementary Table 9. The list of BPH-responsive transcription factors in all comparisons
Supplementary Table 9-3. The list of BPH-responsive transcription factors in R0 vs RT48
TF_anno	Family	log2FoldChange	pvalue	id	MSU	RAP	R0_1_TPM	R0_2_TPM	R0_3_TPM	RT48_1_TPM	RT48_2_TPM	RT48_3_TPM	padj	FC	direction	GO	KO	protein_cluster	GO_des	Nr_des
LOC_Os03g56050.1	AP2	3.52858	0.00100106	LOC4334257	LOC_Os03g56050	Os03g0770700	0.033673	0.074415	0	0.427488	0.232327	0.787881	0.0222271	11.5401	up	NA	K09285	2	NA	NA
LOC_Os01g56690.1	bHLH	7.26106	6.83e-06	LOC9269465	LOC_Os01g56690	Os01g0773800	0	0	0	0.369722	0.864808	0.542611	0.000367741	153.39	up	NA	NA	5	NA	transcription factor BHLH148-like [Oryza sativa Japonica Group] &gt;XP_052140065.1 transcription factor BHLH148-like [Oryza glaberrima] &gt;KAF2952548.1 hypothetical protein DAI22_01g343400 [Oryza sativa Japonica Group]
LOC_Os04g23550.1;LOC_Os04g23550.2	bHLH	4.82394	5.09e-11	LOC4335417	LOC_Os04g23550	Os04g0301500	2.88962	0.480913	0.317961	25.3431	59.647	36.3115	1.08e-08	28.3237	up	NA	NA	1	NA	NA
LOC_Os03g53020.1	bHLH	3.59873	2.8e-17	LOC4334060	LOC_Os03g53020	Os03g0741100	2.66221	0.966891	2.10891	26.5648	33.4917	19.8341	1.69e-14	12.1151	up	NA	NA	5	NA	NA
LOC_Os09g28210.1	bHLH	2.26833	3.2e-05	LOC4347252	LOC_Os09g28210	Os09g0455300	4.80989	1.50949	1.40088	18.1524	8.59223	17.2719	0.0013699	4.81764	up	GO:0005634;GO:0006355;GO:0140110	NA	5	nucleus; regulation of transcription, DNA-templated; transcription regulator activity	transcription factor HEC2 [Oryza sativa Japonica Group] &gt;XP_052168277.1 transcription factor HEC2-like [Oryza glaberrima] &gt;EAZ09361.1 hypothetical protein OsI_31634 [Oryza sativa Indica Group] &gt;KAF2916514.1 hypothetical protein DAI22_09g125000 [Oryza sativa Japonica Group] &gt;BAD38280.1 basic helix-loop-helix (bHLH)-like protein [Oryza sativa Japonica Group] &gt;BAD38453.1 basic helix-l…
LOC_Os01g39330.1	bHLH	1.91351	1.6e-13	LOC4326315	LOC_Os01g39330	Os01g0575200	1.24917	2.05291	1.42896	6.42187	6.38803	7.39735	5.26e-11	3.76724	up	GO:0005634;GO:0006355;GO:0140110	NA	5	nucleus; regulation of transcription, DNA-templated; transcription regulator activity	putative transcription factor bHLH041 [Oryza sativa Japonica Group] &gt;EEC70936.1 hypothetical protein OsI_02527 [Oryza sativa Indica Group] &gt;KAB8081965.1 hypothetical protein EE612_003634 [Oryza sativa] &gt;EEE54848.1 hypothetical protein OsJ_02312 [Oryza sativa Japonica Group] &gt;KAF2950848.1 hypothetical protein DAI22_01g216900 [Oryza sativa Japonica Group] &gt;BAB90265.1 basic helix-loop…
LOC_Os02g47660.1	bHLH	1.78476	2.78e-06	LOC4330462	LOC_Os02g47660	Os02g0705500	3.09261	4.32412	3.25183	20.4976	7.04504	14.9842	0.00017042	3.44561	up	GO:0005634;GO:0006355;GO:0140110	NA	7	nucleus; regulation of transcription, DNA-templated; transcription regulator activity	transcription factor bHLH63 [Oryza sativa Japonica Group] &gt;XP_052141575.1 transcription factor bHLH63-like [Oryza glaberrima] &gt;KAB8088539.1 hypothetical protein EE612_013176 [Oryza sativa] &gt;KAF2946558.1 hypothetical protein DAI22_02g302900 [Oryza sativa Japonica Group] &gt;BAD08039.1 putative bHLH transcription factor [Oryza sativa Japonica Group] &gt;BAF09782.1 Os02g0705500 [Oryza sativ…
LOC_Os01g50940.1	bHLH	1.68929	1e-10	LOC4327669	LOC_Os01g50940	Os01g0705700	1.81563	3.3577	2.37283	9.34265	8.26202	9.96001	1.95e-08	3.22498	up	NA	K25801	20	NA	transcription factor bHLH13 [Oryza sativa Japonica Group] &gt;EAZ13257.1 hypothetical protein OsJ_03182 [Oryza sativa Japonica Group] &gt;KAF2951888.1 hypothetical protein DAI22_01g295800 [Oryza sativa Japonica Group]
LOC_Os05g46370.1	bHLH	1.43946	0.000168433	LOC9269440	LOC_Os05g46370	Os05g0541400	0.829512	0.682605	0.724293	2.31994	1.54825	3.13842	0.00543087	2.71219	up	NA	NA	9	NA	transcription factor LATE FLOWERING [Oryza sativa Japonica Group] &gt;A0A0P0WQ90.1 RecName: Full=Transcription factor LATE FLOWERING; Short=OsLF; AltName: Full=Basic helix-loop-helix protein 119; Short=OsbHLH119 [Oryza sativa Japonica Group] &gt;BAS95124.1 Os05g0541400 [Oryza sativa Japonica Group]
LOC_Os01g55150.1	bZIP	1.79039	0.000215174	LOC4325139	LOC_Os01g55150	Os01g0756200	7.6681	19.8165	10.7258	53.0242	19.9954	78.0875	0.00661736	3.45908	up	NA	NA	9	NA	basic leucine zipper 6 isoform X2 [Oryza sativa Japonica Group]
LOC_Os02g14910.1	bZIP	1.52701	0.00263237	LOC4328871	LOC_Os02g14910	Os02g0247100	2.66869	8.33851	6.17804	20.0555	7.975	28.5482	0.0459488	2.88187	up	NA	NA	9	NA	NA
LOC_Os03g20650.1	bZIP	-1.45709	0.00013252	LOC107277499	LOC_Os03g20650	Os03g0322700	5.83038	8.0934	8.08594	2.74847	4.24919	1.96029	0.00446133	0.364227	down	NA	K14432	17	NA	ABSCISIC ACID-INSENSITIVE 5-like protein 2 [Oryza sativa Japonica Group] &gt;XP_052149537.1 ABSCISIC ACID-INSENSITIVE 5-like protein 2 [Oryza glaberrima] &gt;KAF2939013.1 hypothetical protein DAI22_03g160500 [Oryza sativa Japonica Group]
LOC_Os03g32230.1	C2H2	4.15941	9.06e-15	LOC4333197	LOC_Os03g32230	Os03g0437200	0.398861	0.142803	0.13269	4.07181	5.84709	4.75706	3.56e-12	17.8693	up	NA	NA	5	NA	zinc finger protein 36-like [Oryza sativa Japonica Group] &gt;Q75KE5.1 RecName: Full=Zinc finger protein 36; AltName: Full=Protein BROAD-SPECTRUM RESISTANCE DIGU 1 [Oryza sativa Japonica Group] &gt;EAY90588.1 hypothetical protein OsI_12190 [Oryza sativa Indica Group] &gt;KAB8092319.1 hypothetical protein EE612_018309 [Oryza sativa] &gt;AAR89021.1 C2H2-type zinc finger protein ZFP36 [Oryza sativa …
LOC_Os01g63980.1	C2H2	3.42461	0.0014088	LOC4325059	LOC_Os01g63980	Os01g0859100	0	0.085188	0.039577	0.410046	0.29803	1.05023	0.02923	10.7377	up	NA	NA	5	NA	protein TRANSPARENT TESTA 1 [Oryza sativa Japonica Group] &gt;XP_052135727.1 protein TRANSPARENT TESTA 1-like [Oryza glaberrima] &gt;KAB8084387.1 hypothetical protein EE612_006944 [Oryza sativa] &gt;KAF2953409.1 hypothetical protein DAI22_01g406900 [Oryza sativa Japonica Group] &gt;BAF06778.1 Os01g0859100 [Oryza sativa Japonica Group] &gt;BAG89073.1 unnamed protein product [Oryza sativa Japonica …
LOC_Os03g60570.1	C2H2	3.16807	7.17e-05	LOC4334593	LOC_Os03g60570	Os03g0820400	1.23893	0.363769	0.08422	6.98307	3.90493	6.89168	0.00269243	8.98842	up	NA	NA	5	NA	zinc finger protein ZAT12 [Oryza sativa Japonica Group] &gt;ABY66164.1 zinc finger protein [Oryza sativa Indica Group] &gt;KAB8094208.1 hypothetical protein EE612_021330 [Oryza sativa] &gt;AAO65858.1 putative Cys2/His2 zinc-finger protein [Oryza sativa Japonica Group] &gt;AAP42460.1 zinc finger protein ZFP15 [Oryza sativa Japonica Group] &gt;AAP74356.1 C2H2 type zinc finger transcription factor Z…
LOC_Os03g60560.1	C2H2	2.21507	0.000114965	LOC4334592	LOC_Os03g60560	Os03g0820300	1.9784	0.679622	0.598816	7.39702	3.42033	7.07984	0.00397872	4.64304	up	GO:0009536	NA	5	plastid	zinc finger protein ZAT12 [Oryza sativa Japonica Group] &gt;EAY92365.1 hypothetical protein OsI_14094 [Oryza sativa Indica Group] &gt;KAB8094207.1 hypothetical protein EE612_021325 [Oryza sativa] &gt;AAO65881.1 putative Cys2/His2 zinc-finger protein [Oryza sativa Japonica Group] &gt;AAP42461.1 zinc finger protein ZFP182 [Oryza sativa Japonica Group] &gt;ABF99585.1 Zinc finger, C2H2 type family pr…
LOC_Os03g55540.1	C2H2	1.56288	7.01e-05	LOC4334213	LOC_Os03g55540	Os03g0764100	59.4602	30.9103	24.1299	154.803	137.089	97.9908	0.00265114	2.95442	up	NA	NA	5	NA	zinc finger protein 1 [Oryza sativa Japonica Group] &gt;AAK01713.1 zinc finger transcription factor ZF1 [Oryza sativa Indica Group] &gt;KAB8093711.1 hypothetical protein EE612_020626 [Oryza sativa] &gt;AAL34135.1 zinc finger transcription factor ZF1 [Oryza sativa Japonica Group] &gt;ABF99028.1 Zinc-finger protein 1, putative, expressed [Oryza sativa Japonica Group] &gt;EAY91956.1 hypothetical pro…
LOC_Os03g13600.1;LOC_Os03g13600.2	C2H2	1.02933	0.000653637	LOC4332200	LOC_Os03g13600	Os03g0239300	12.9612	10.9444	14.0123	39.7593	22.2501	21.034	0.0158559	2.04107	up	NA	NA	5	NA	zinc finger protein 7 [Oryza sativa Japonica Group] &gt;XP_025879942.1 zinc finger protein 7 [Oryza sativa Japonica Group] &gt;EAY89193.1 hypothetical protein OsI_10690 [Oryza sativa Indica Group] &gt;KAB8091004.1 hypothetical protein EE612_016390 [Oryza sativa] &gt;ABF94874.1 Zinc finger, C2H2 type family protein, expressed [Oryza sativa Japonica Group] &gt;ABF94875.1 Zinc finger, C2H2 type fami…
LOC_Os05g03760.1	C3H	1.378	0.0005142	LOC4337692	LOC_Os05g03760	Os05g0128200	57.9341	26.5792	37.3645	162.113	127.543	76.6492	0.0133236	2.59908	up	NA	NA	5	NA	NA
LOC_Os02g08150.1	CO-like	-2.58424	1.32e-07	LOC4328490	LOC_Os02g08150	Os02g0178100	24.1723	8.08218	26.241	3.69035	4.87901	2.59546	1.28e-05	0.16675	down	NA	NA	17	NA	zinc finger protein CONSTANS-LIKE 3 [Oryza sativa Japonica Group]
LOC_Os09g33550.1	CO-like	2.22749	2.02e-14	LOC4347535	LOC_Os09g33550	Os09g0509700	5.23349	4.13038	2.76249	23.1373	19.1075	22.949	7.47e-12	4.68319	up	NA	NA	4	NA	NA
LOC_Os06g19444.1;LOC_Os06g19444.2	CO-like	1.65985	1.01e-07	LOC4340812	LOC_Os06g19444	Os06g0298200	2.46022	4.486	2.46999	9.2109	12.0865	12.1442	1.01e-05	3.15984	up	NA	NA	6	NA	zinc finger protein CONSTANS-LIKE 9 isoform X1 [Oryza sativa Japonica Group] &gt;KAB8102188.1 hypothetical protein EE612_033522 [Oryza sativa] &gt;KAF2926398.1 hypothetical protein DAI22_06g124900 [Oryza sativa Japonica Group] &gt;BAG93782.1 unnamed protein product [Oryza sativa Japonica Group] &gt;BAS97360.1 Os06g0298200 [Oryza sativa Japonica Group]
LOC_Os07g47140.1	CO-like	-1.34434	0.00146031	LOC4344220	LOC_Os07g47140	Os07g0667300	13.43	10.8687	11.6096	3.50399	8.44374	3.84922	0.0299873	0.393835	down	NA	NA	8	NA	zinc finger protein CONSTANS-LIKE 13 isoform X1 [Oryza sativa Japonica Group] &gt;EAZ05064.1 hypothetical protein OsI_27253 [Oryza sativa Indica Group] &gt;KAB8106768.1 hypothetical protein EE612_041254 [Oryza sativa] &gt;KAF2924390.1 hypothetical protein DAI22_07g265600 [Oryza sativa Japonica Group] &gt;BAF22488.1 Os07g0667300 [Oryza sativa Japonica Group] &gt;BAG99873.1 unnamed protein product …
LOC_Os02g49230.1;LOC_Os02g49230.2;LOC_Os02g49230.3;LOC_Os02g49230.4;LOC_Os02g49230.5;LOC_Os02g49230.6	CO-like	1.24038	0.000247705	LOC4330574	LOC_Os02g49230	Os02g0724000	11.9015	9.94564	6.61101	23.9324	32.392	20.6094	0.00743286	2.36261	up	GO:0003677;GO:0005622;GO:0008270	NA	4	DNA binding; intracellular; zinc ion binding	zinc finger protein CONSTANS-LIKE 9 isoform X1 [Oryza sativa Japonica Group] &gt;XP_015627428.1 zinc finger protein CONSTANS-LIKE 9 isoform X1 [Oryza sativa Japonica Group] &gt;XP_025878659.1 zinc finger protein CONSTANS-LIKE 9 isoform X1 [Oryza sativa Japonica Group] &gt;AGG54061.1 CONSTANS-like protein Days to heading on chromosome 2 [Oryza sativa Japonica Group] &gt;BAA33206.1 zinc finger prot…
LOC_Os04g41560.2;LOC_Os04g41560.4	DBB	-1.79587	6.88e-07	LOC4336260	LOC_Os04g41560	Os04g0493000	247.764	141.027	321.776	92.258	83.4272	59.6039	5.35e-05	0.287998	down	GO:0003677;GO:0005622;GO:0008270	NA	17	DNA binding; intracellular; zinc ion binding	NA
LOC_Os02g39360.1	DBB	-1.39493	0.000394725	LOC4329923	LOC_Os02g39360	Os02g0606200	33.6129	18.3597	37.3152	12.8322	16.8702	8.97008	0.0107734	0.380264	down	GO:0003677;GO:0005622;GO:0008270;GO:0031410	NA	8	DNA binding; intracellular; zinc ion binding; cytoplasmic vesicle	B-box zinc finger protein 25 [Oryza sativa Japonica Group] &gt;KAB8087858.1 hypothetical protein EE612_012293 [Oryza sativa] &gt;ADX60217.1 ORPHAN transcription factor, partial [Oryza sativa Japonica Group] &gt;KAF2945749.1 hypothetical protein DAI22_02g239700 [Oryza sativa Japonica Group] &gt;BAA33203.1 zinc finger protein [Oryza sativa Japonica Group] &gt;BAD19334.1 zinc finger protein [Oryza s…
LOC_Os09g35880.1	DBB	-1.26026	8.83e-11	LOC4347644	LOC_Os09g35880	Os09g0527900	117.32	96.0767	117.771	55.6608	47.5809	55.4315	1.72e-08	0.417468	down	NA	NA	17	NA	B-box zinc finger protein 18 [Oryza sativa Japonica Group] &gt;XP_052168834.1 B-box zinc finger protein 18-like [Oryza glaberrima] &gt;EEC84918.1 hypothetical protein OsI_32118 [Oryza sativa Indica Group] &gt;KAB8111422.1 hypothetical protein EE612_049071 [Oryza sativa] &gt;EEE70088.1 hypothetical protein OsJ_30084 [Oryza sativa Japonica Group] &gt;KAF2917160.1 hypothetical protein DAI22_09g17230…
LOC_Os05g11510.1	DBB	-1.08219	0.000212877	LOC4338069	LOC_Os05g11510	Os05g0204600	29.568	25.9739	28.2136	12.905	19.6207	12.1354	0.00655723	0.47231	down	NA	NA	10	NA	NA
LOC_Os03g07360.1	Dof	-1.64469	6.54e-06	LOC4331765	LOC_Os03g07360	Os03g0169600	59.3101	36.2675	60.4775	22.1337	23.032	11.872	0.000355915	0.319814	down	GO:0003677	NA	17	DNA binding	cyclic dof factor 1 [Oryza sativa Japonica Group] &gt;KAB8090401.1 hypothetical protein EE612_015572 [Oryza sativa] &gt;AAL84292.1 putative zinc finger DNA-binding protein [Oryza sativa Japonica Group] &gt;AAO72548.1 putative H-protein promoter binding factor-2a [Oryza sativa Japonica Group] &gt;ABF94195.1 Dof domain, zinc finger family protein, expressed [Oryza sativa Japonica Group] &gt;EAZ2573…
LOC_Os07g48570.1	Dof	-1.28065	1.03e-06	LOC4344326	LOC_Os07g48570	Os07g0685000	45.9029	31.7242	43.3485	20.2726	20.4266	16.2868	7.48e-05	0.411611	down	NA	NA	8	NA	NA
LOC_Os04g38400.1	EIL	-1.39744	8.27e-05	LOC107278750	LOC_Os04g38400	Os04g0456900	4.25528	3.87547	5.01154	2.37601	2.15747	1.14685	0.00303254	0.379603	down	NA	K14514	1	NA	ETHYLENE INSENSITIVE 3-like 5 protein [Oryza sativa Japonica Group]
LOC_Os07g48630.1;LOC_Os07g48630.2	EIL	1.28624	1.6e-09	LOC4344331	LOC_Os07g48630	Os07g0685700	50.1228	46.4631	46.0969	163.411	125.56	109.456	2.36e-07	2.43892	up	NA	K14514	5	NA	ETHYLENE INSENSITIVE 3-like 1 protein [Oryza sativa Japonica Group] &gt;Q8W3L9.2 RecName: Full=Protein ETHYLENE-INSENSITIVE 3-like 2; Short=EIN3-like protein 2; Short=OsEIL2 [Oryza sativa Japonica Group] &gt;ADX60245.1 EIL transcription factor, partial [Oryza sativa Japonica Group] &gt;EEE67841.1 hypothetical protein OsJ_25629 [Oryza sativa Japonica Group] &gt;KAF2924581.1 hypothetical protein DA…
LOC_Os01g73770.1	ERF	6.43943	0.00172494	LOC4323832	LOC_Os01g73770	Os01g0968800	0	0	0	0.079467	0.76651	0.167797	0.0339328	86.7882	up	NA	K09286	1	NA	NA
LOC_Os02g54050.1	ERF	6.42571	0.000387546	LOC107278604	LOC_Os02g54050	Os02g0781300	0	0	0	0.138155	0.233394	0.241747	0.010631	85.9671	up	NA	K09286	1	NA	ethylene-responsive transcription factor ERF018 [Oryza sativa Japonica Group] &gt;KAB8089185.1 hypothetical protein EE612_014055 [Oryza sativa] &gt;KAF2947262.1 hypothetical protein DAI22_02g356900 [Oryza sativa Japonica Group] &gt;BAS81220.1 Os02g0781300 [Oryza sativa Japonica Group]
LOC_Os07g47790.1;LOC_Os07g47790.2	ERF	6.25672	0.000823874	LOC4344266	LOC_Os07g47790	Os07g0674800	0	0	0	0.304019	0.191616	0.441072	0.0189088	76.4647	up	NA	K09286	5	NA	ethylene-responsive transcription factor RAP2-3 [Oryza sativa Japonica Group] &gt;EAZ05119.1 hypothetical protein OsI_27312 [Oryza sativa Indica Group] &gt;KAF2924485.1 hypothetical protein DAI22_07g271800 [Oryza sativa Japonica Group] &gt;BAC83539.1 AP2 domain transcription factor EREBP [Oryza sativa Japonica Group] &gt;BAD31975.1 AP2 domain transcription factor EREBP [Oryza sativa Japonica Grou…
LOC_Os09g35030.1	ERF	5.49118	6.28e-07	LOC4347620	LOC_Os09g35030	Os09g0522200	1.87257	0.54788	0.076707	65.8346	29.9232	38.2437	5e-05	44.979	up	NA	K09286	5	NA	NA
LOC_Os09g35010.1	ERF	5.19116	1.92e-16	LOC4347618	LOC_Os09g35010	Os09g0522000	1.13406	0.234337	0.216529	33.3051	17.6451	17.0288	1.04e-13	36.5338	up	NA	K09286	5	NA	dehydration-responsive element-binding protein 1B, partial [Oryza sativa Japonica Group]
LOC_Os09g35020.1	ERF	4.91519	3.02e-16	LOC4347619	LOC_Os09g35020	Os09g0522100	0.245318	0.073535	0.068327	5.75371	3.98731	3.52825	1.6e-13	30.1731	up	GO:0009536	K09286	5	plastid	dehydration-responsive element-binding protein 1H [Oryza sativa Japonica Group] &gt;KAF2917129.1 hypothetical protein DAI22_09g169500 [Oryza sativa Japonica Group] &gt;BAD46703.1 putative CBF3-like protein [Oryza sativa Japonica Group]
LOC_Os07g22730.1	ERF	4.87045	2.09e-09	LOC9266984	LOC_Os07g22730	Os07g0410300	0.088849	0	0.073993	1.67214	2.53405	2.53648	3.03e-07	29.2517	up	NA	K09286	4	NA	ethylene-responsive transcription factor 15 [Oryza sativa Japonica Group] &gt;XP_052163223.1 ethylene-responsive transcription factor 15-like [Oryza glaberrima] &gt;EAZ03592.1 hypothetical protein OsI_25728 [Oryza sativa Indica Group] &gt;KAF2922423.1 hypothetical protein DAI22_07g112350 [Oryza sativa Japonica Group]
LOC_Os02g43790.1	ERF	3.66335	2.86e-09	LOC4330189	LOC_Os02g43790	Os02g0654700	6.08771	0.88774	1.64264	47.776	44.1637	36.3359	4.01e-07	12.67	up	GO:0003700;GO:0005634;GO:0006355	K09286	5	DNA-binding transcription factor activity; nucleus; regulation of transcription, DNA-templated	NA
LOC_Os04g48350.1	ERF	3.61159	3.06e-12	LOC4336721	LOC_Os04g48350	Os04g0572400	1.16805	0.477018	0.273	8.70534	9.65045	8.618	7.79e-10	12.2236	up	NA	K09286	5	NA	dehydration-responsive element-binding protein 1E [Oryza sativa Japonica Group] &gt;XP_052153133.1 dehydration-responsive element-binding protein 1E [Oryza glaberrima] &gt;A2XWL6.1 RecName: Full=Dehydration-responsive element-binding protein 1E; Short=Protein DREB1E [Oryza sativa Indica Group] &gt;Q8H273.1 RecName: Full=Dehydration-responsive element-binding protein 1E; Short=Protein DREB1E [Oryz…
LOC_Os02g45450.1	ERF	3.60537	2.63e-11	LOC4330306	LOC_Os02g45450	Os02g0677300	0.51304	0.122673	0.225691	3.79928	3.9458	4.54957	5.78e-09	12.171	up	NA	K09286	5	NA	dehydration-responsive element-binding protein 1G [Oryza sativa Japonica Group] &gt;Q6EP77.1 RecName: Full=Dehydration-responsive element-binding protein 1G; Short=Protein DREB1G [Oryza sativa Japonica Group] &gt;KAB8088403.1 hypothetical protein EE612_012995 [Oryza sativa] &gt;EAZ24170.1 hypothetical protein OsJ_07915 [Oryza sativa Japonica Group] &gt;KAF2946341.1 hypothetical protein DAI22_02g2…
LOC_Os06g03670.1	ERF	3.60433	0.000162953	LOC4339974	LOC_Os06g03670	Os06g0127100	0.541642	0.72876	0	4.43407	5.25379	7.65785	0.00532696	12.1622	up	NA	K09286	5	NA	dehydration-responsive element-binding protein 1C [Oryza sativa Japonica Group] &gt;A2Y8S6.1 RecName: Full=Dehydration-responsive element-binding protein 1C; Short=Protein DREB1C; AltName: Full=Protein C-repeat-binding factor 1 [Oryza sativa Indica Group] &gt;Q9LWV3.1 RecName: Full=Dehydration-responsive element-binding protein 1C; Short=Protein DREB1C; AltName: Full=Protein C-repeat-binding fact…
LOC_Os01g21120.1	ERF	3.26796	3.82e-26	LOC4327287	LOC_Os01g21120	Os01g0313300	4.10435	2.88543	3.70072	35.453	29.9468	53.7255	6.2e-23	9.6328	up	NA	K09286	9	NA	ethylene-responsive transcription factor ERF071 [Oryza sativa Japonica Group] &gt;KAB8081166.1 hypothetical protein EE612_002120 [Oryza sativa] &gt;KAF2949845.1 hypothetical protein DAI22_01g146800 [Oryza sativa Japonica Group] &gt;BAB92777.1 putative ethylene response factor 2 [Oryza sativa Japonica Group] &gt;BAF04782.1 Os01g0313300 [Oryza sativa Japonica Group] &gt;BAG99412.1 unnamed protein p…
LOC_Os02g45420.1	ERF	2.27265	6.4e-05	LOC9270349	LOC_Os02g45420	Os02g0676800	0.0624	0.243782	0.2362	0.87853	0.948754	1.15372	0.00247831	4.83208	up	NA	K09286	5	NA	ethylene-responsive transcription factor ERF027 [Oryza sativa Japonica Group] &gt;KAB8088402.1 hypothetical protein EE612_012989 [Oryza sativa] &gt;BAD29233.1 putative DRE binding factor 2 [Oryza sativa Japonica Group] &gt;BAD29539.1 putative DRE binding factor 2 [Oryza sativa Japonica Group] &gt;BAH01466.1 unnamed protein product [Oryza sativa Japonica Group] &gt;BAH91841.1 Os02g0676800 [Oryza s…
LOC_Os04g46220.1	ERF	2.21963	1.13e-07	LOC4336571	LOC_Os04g46220	Os04g0546800	12.9916	5.15579	5.29013	53.5502	34.612	39.3474	1.11e-05	4.65773	up	NA	K09286	5	NA	ethylene-responsive transcription factor 2 [Oryza sativa Japonica Group] &gt;KAB8096335.1 hypothetical protein EE612_024741 [Oryza sativa] &gt;ABK34954.1 development related ERF protein [Oryza sativa Japonica Group] &gt;KAF2935190.1 hypothetical protein DAI22_04g214700 [Oryza sativa Japonica Group] &gt;CAD41472.3 OSJNBa0079A21.16 [Oryza sativa Japonica Group] &gt;BAF15388.1 Os04g0546800 [Oryza sa…
LOC_Os03g08500.1;LOC_Os03g08500.2	ERF	1.84425	1.93e-06	LOC4331848	LOC_Os03g08500	Os03g0183300	105.575	58.4478	61.5262	488.152	207.854	251.403	0.000125658	3.59067	up	NA	K09286	5	NA	ethylene-responsive transcription factor ERF073 [Oryza sativa Japonica Group] &gt;AAV98703.1 BTH-induced ERF transcriptional factor 4 [Oryza sativa Indica Group] &gt;AAK92632.1 Putative EREBP-like protein [Oryza sativa Japonica Group] &gt;ABF94333.1 AP2 domain containing protein, expressed [Oryza sativa Japonica Group] &gt;ACJ74069.1 AP2/ERF domain protein [Oryza sativa Japonica Group] &gt;ADR669…
LOC_Os06g07030.1	ERF	1.75688	6.42e-09	LOC4340244	LOC_Os06g07030	Os06g0166400	8.07086	6.57064	6.81847	38.1992	25.2376	20.0711	8.41e-07	3.37967	up	NA	K09286	4	NA	ethylene-responsive transcription factor RAP2-9 [Oryza sativa Japonica Group] &gt;KAF2925381.1 hypothetical protein DAI22_06g047700 [Oryza sativa Japonica Group] &gt;BAD67600.1 putative AP2 domain containing protein RAP2.1 [Oryza sativa Japonica Group] &gt;BAD67863.1 putative AP2 domain containing protein RAP2.1 [Oryza sativa Japonica Group] &gt;BAF18828.1 Os06g0166400 [Oryza sativa Japonica Grou…
LOC_Os04g52090.1	ERF	1.62985	0.000267252	LOC4336947	LOC_Os04g52090	Os04g0610400	23.2748	11.8725	7.12583	61.7803	51.0574	38.3295	0.00786486	3.09482	up	NA	K09286	5	NA	ethylene-responsive transcription factor 11 [Oryza sativa Japonica Group] &gt;KAB8096875.1 hypothetical protein EE612_025471 [Oryza sativa] &gt;KAF2935783.1 hypothetical protein DAI22_04g256600 [Oryza sativa Japonica Group] &gt;CAE03565.2 OSJNBa0085I10.10 [Oryza sativa Japonica Group] &gt;BAF15743.1 Os04g0610400 [Oryza sativa Japonica Group] &gt;BAS90945.1 Os04g0610400 [Oryza sativa Japonica Grou…
LOC_Os07g42510.1	ERF	1.3684	7.16e-06	LOC4343912	LOC_Os07g42510	Os07g0617000	8.49502	8.59212	6.12919	29.0533	14.2777	25.8873	0.000382419	2.58185	up	NA	K09286	7	NA	ethylene-responsive transcription factor 1-like [Oryza sativa Japonica Group] &gt;EAZ40665.1 hypothetical protein OsJ_25135 [Oryza sativa Japonica Group] &gt;KAF2923929.1 hypothetical protein DAI22_07g230300 [Oryza sativa Japonica Group] &gt;BAC79864.1 EREB-like protein [Oryza sativa Japonica Group] &gt;BAC79993.1 EREB-like protein [Oryza sativa Japonica Group] &gt;BAF22194.1 Os07g0617000 [Oryza …
LOC_Os05g41780.1	ERF	1.28369	9.66e-06	LOC4339209	LOC_Os05g41780	Os05g0497300	56.4681	40.0518	31.5557	138	117.122	102.807	0.000497353	2.43462	up	NA	K09286	5	NA	ethylene-responsive transcription factor 4 [Oryza sativa Japonica Group] &gt;XP_052157498.1 ethylene-responsive transcription factor 4-like [Oryza glaberrima] &gt;AAT10384.1 ethylene-responsive element binding factor [Oryza sativa] &gt;EAY98556.1 hypothetical protein OsI_20469 [Oryza sativa Indica Group] &gt;AAT07584.1 putative ethylene-responsive element binding factor [Oryza sativa Japonica Gro…
LOC_Os09g11480.1;LOC_Os09g11480.2	ERF	1.15075	0.0016449	LOC4346629	LOC_Os09g11480	Os09g0287000	20.4522	13.499	14.175	64.2593	26.5413	33.8415	0.0328423	2.22029	up	NA	K09286	5	NA	ethylene-responsive transcription factor 1-like [Oryza sativa Japonica Group] &gt;KAB8109959.1 hypothetical protein EE612_046607 [Oryza sativa] &gt;ACJ74072.1 AP2/ERF domain protein [Oryza sativa Japonica Group] &gt;EAZ44075.1 hypothetical protein OsJ_28694 [Oryza sativa Japonica Group] &gt;KAF2915475.1 hypothetical protein DAI22_09g036766 [Oryza sativa Japonica Group] &gt;BAD29170.1 ethylene res…
LOC_Os03g60120.1	ERF	-1.03882	0.000608491	LOC4334558	LOC_Os03g60120	Os03g0815800	137.73	128.83	163.569	70.9032	105.148	60.0858	0.014999	0.486726	down	NA	K09286	17	NA	ethylene-responsive transcription factor CRF5 [Oryza sativa Japonica Group] &gt;KAB8094167.1 hypothetical protein EE612_021266 [Oryza sativa] &gt;AAO60030.1 putative AP2 domain containing protein [Oryza sativa Japonica Group] &gt;AAR01751.1 putative AP2 domain transcription factor [Oryza sativa Japonica Group] &gt;ABF99541.1 AP2 domain containing protein, expressed [Oryza sativa Japonica Group] &…
LOC_Os01g74020.1	G2-like	3.63228	1.34e-19	LOC4326391	LOC_Os01g74020	Os01g0971800	6.66009	4.74793	2.42745	49.7543	73.2262	72.5629	1.35e-16	12.4001	up	NA	NA	4	NA	NA
LOC_Os06g24070.1	G2-like	-1.53719	1.86e-06	LOC4340977	LOC_Os06g24070	Os06g0348800	108.201	84.4582	134.681	59.9214	39.8766	30.1026	0.000121371	0.344557	down	NA	NA	17	NA	NA
LOC_Os02g22020.1	G2-like	-1.28478	3.59e-07	LOC4329184	LOC_Os02g22020	Os02g0325600	17.6517	24.2527	25.8179	11.7529	11.3042	8.40652	3.01e-05	0.410435	down	NA	NA	17	NA	transcription factor NIGT1 [Oryza sativa Japonica Group] &gt;XP_052141907.1 transcription factor NIGT1 [Oryza glaberrima] &gt;Q6Z869.1 RecName: Full=Transcription factor NIGT1; AltName: Full=MYB-domain transcription factor NIGT1; AltName: Full=Protein NITRATE-INDUCIBLE GARP-TYPE TRANSCRIPTIONAL REPRESSOR 1 [Oryza sativa Japonica Group] &gt;KAB8087068.1 hypothetical protein EE612_010868 [Oryza sat…
LOC_Os06g49040.1	G2-like	-1.26622	2e-07	LOC4341990	LOC_Os06g49040	Os06g0703900	95.7047	72.9109	82.9167	38.0096	45.3574	35.7589	1.84e-05	0.415747	down	NA	NA	17	NA	protein PHOSPHATE STARVATION RESPONSE 3-like [Oryza sativa Japonica Group] &gt;KAB8103762.1 hypothetical protein EE612_036357 [Oryza sativa] &gt;EEE66318.1 hypothetical protein OsJ_22555 [Oryza sativa Japonica Group] &gt;KAF2928359.1 hypothetical protein DAI22_06g273100 [Oryza sativa Japonica Group] &gt;BAD54045.1 putative transfactor [Oryza sativa Japonica Group] &gt;BAF20417.1 Os06g0703900 [Ory…
LOC_Os06g01620.1	GRAS	-1.42649	5.56e-05	LOC107275984	LOC_Os06g01620	Os06g0105100	6.0394	6.6946	8.76076	3.46796	3.67261	1.90147	0.00217981	0.372035	down	NA	NA	8	NA	scarecrow-like protein 6 [Oryza sativa Japonica Group] &gt;KAF2924750.1 hypothetical protein DAI22_06g002800 [Oryza sativa Japonica Group] &gt;KAF2924751.1 hypothetical protein DAI22_06g002800 [Oryza sativa Japonica Group] &gt;BAS95739.1 Os06g0105350 [Oryza sativa Japonica Group]
LOC_Os06g10600.1	HD-ZIP	1.68899	0.000589385	LOC4340445	LOC_Os06g10600	Os06g0208100	7.97375	24.4083	13.663	36.6848	32.8929	97.9654	0.0147238	3.2243	up	NA	K09338	9	NA	NA
LOC_Os03g10210.1	HD-ZIP	1.62778	0.000521273	LOC4331956	LOC_Os03g10210	Os03g0198600	1.50881	2.02058	1.60266	8.25823	2.41715	7.76581	0.0134361	3.09037	up	NA	K09338	9	NA	homeobox-leucine zipper protein HOX12 [Oryza sativa Japonica Group] &gt;XP_052149088.1 homeobox-leucine zipper protein HOX12 [Oryza glaberrima] &gt;Q10QF2.1 RecName: Full=Homeobox-leucine zipper protein HOX12; AltName: Full=HD-ZIP protein HOX12; AltName: Full=Homeodomain transcription factor HOX12; AltName: Full=OsHox12 [Oryza sativa Japonica Group] &gt;KAB8090657.1 hypothetical protein EE612_015…
LOC_Os02g43330.1	HD-ZIP	1.58775	0.00056237	LOC4330155	LOC_Os02g43330	Os02g0649300	3.54402	5.19971	5.45078	25.094	16.6888	6.79719	0.0141855	3.0058	up	NA	K09338	15	NA	NA
LOC_Os06g04850.1	HD-ZIP	1.54177	0.00045377	LOC4340069	LOC_Os06g04850	Os06g0140400	7.94979	20.4574	7.44026	38.7145	23.7998	55.4473	0.0121049	2.91152	up	NA	K09338	9	NA	NA
LOC_Os10g23090.2;LOC_Os10g23090.1	HD-ZIP	1.04516	0.00055622	LOC4348492	LOC_Os10g23090	Os10g0377300	2.03871	2.6585	2.8509	6.09315	4.2855	7.47493	0.0140989	2.06359	up	NA	K09338	2	NA	homeobox-leucine zipper protein HOX8 [Oryza sativa Japonica Group] &gt;Q338Z7.1 RecName: Full=Homeobox-leucine zipper protein HOX8; AltName: Full=HD-ZIP protein HOX8; AltName: Full=Homeodomain transcription factor HOX8; AltName: Full=OsHox8 [Oryza sativa Japonica Group] &gt;KAB8112547.1 hypothetical protein EE612_051028 [Oryza sativa] &gt;ABB47385.1 Homeobox domain containing protein, expressed […
LOC_Os03g53340.1;LOC_Os03g53340.2;LOC_Os03g53340.3;LOC_Os03g53340.6	HSF	5.05981	6.17e-10	LOC4334080	LOC_Os03g53340	Os03g0745000	0.03891	0.05449	0	1.15346	1.72705	0.908247	9.88e-08	33.3546	up	NA	K09419	5	NA	NA
LOC_Os08g43334.1;LOC_Os08g43334.2	HSF	2.26431	2.5e-11	LOC4346229	LOC_Os08g43334	Os08g0546800	3.13013	2.36463	2.30946	15.7358	17.2821	9.61128	5.59e-09	4.80425	up	NA	K09419	5	NA	heat stress transcription factor B-2b isoform X1 [Oryza sativa Japonica Group] &gt;AAQ23056.1 heat shock factor RHSF2 [Oryza sativa Japonica Group] &gt;BAF24337.1 Os08g0546800 [Oryza sativa Japonica Group]
LOC_Os01g53220.1	HSF	1.94311	1.57e-05	LOC4324158	LOC_Os01g53220	Os01g0733200	2.95973	1.9629	4.40308	18.0114	15.4862	7.70738	0.000758099	3.84534	up	GO:0003677;GO:0003700;GO:0005634;GO:0006355	K09419	4	DNA binding; DNA-binding transcription factor activity; nucleus; regulation of transcription, DNA-templated	heat stress transcription factor C-1b [Oryza sativa Japonica Group] &gt;Q942D6.1 RecName: Full=Heat stress transcription factor C-1b; AltName: Full=Heat stress transcription factor 11; Short=rHsf11; AltName: Full=Heat stress transcription factor 3; Short=OsHsf-03 [Oryza sativa Japonica Group] &gt;KAB8083375.1 hypothetical protein EE612_005539 [Oryza sativa] &gt;AAQ23065.1 heat shock factor RHSF11…
LOC_Os04g48030.1	HSF	1.73872	4.87e-14	LOC4336701	LOC_Os04g48030	Os04g0568700	3.65781	5.00671	5.30537	16.2636	18.0691	18.579	1.73e-11	3.33739	up	NA	K09419	5	NA	NA
LOC_Os09g35790.1;LOC_Os09g35790.2;LOC_Os09g35790.3	HSF	1.61525	1.1e-13	LOC4347637	LOC_Os09g35790	Os09g0526600	10.1206	9.18536	8.22227	28.1549	29.3108	37.0773	3.67e-11	3.06365	up	NA	K09419	5	NA	heat stress transcription factor B-2c isoform X6 [Oryza sativa Japonica Group]
LOC_Os01g43590.1;LOC_Os01g43590.2	HSF	-1.39142	0.000219201	LOC4326685	LOC_Os01g43590	Os01g0625300	3.17181	2.20197	3.67949	1.10336	1.26268	1.58795	0.0067015	0.38119	down	NA	K09419	8	NA	NA
LOC_Os01g32770.1	LBD	2.5756	5.43e-13	LOC4324028	LOC_Os01g32770	Os01g0511000	30.882	30.3124	13.8486	227.041	148.112	137.282	1.58e-10	5.96118	up	NA	NA	5	NA	LOB domain-containing protein 40 [Oryza sativa Japonica Group] &gt;KAB8081614.1 hypothetical protein EE612_002990 [Oryza sativa] &gt;KAF2950407.1 hypothetical protein DAI22_01g184000 [Oryza sativa Japonica Group]
LOC_Os05g03160.1	LBD	1.82886	0.00145755	LOC107278669	LOC_Os05g03160	Os05g0123000	1.4125	0.770969	0.312911	3.86535	3.47081	2.89015	0.0299543	3.55256	up	NA	NA	4	NA	LOB domain-containing protein 1 [Oryza sativa Japonica Group] &gt;KAF2928907.1 hypothetical protein DAI22_05g017800 [Oryza sativa Japonica Group]
LOC_Os08g06280.1;LOC_Os08g06280.2;LOC_Os08g06280.3;LOC_Os08g06280.4;LOC_Os08g06280.7;LOC_Os08g06280.8;LOC_Os08g06280.9	LSD	-1.38849	2.95e-07	LOC4344713	LOC_Os08g06280	Os08g0159500	159.858	145.265	182.932	54.7601	82.0725	71.6041	2.57e-05	0.381965	down	NA	NA	17	NA	protein LSD1 isoform X2 [Oryza sativa Japonica Group]
LOC_Os06g45650.1	MIKC_MADS	6.22463	0.0026232	LOC4341786	LOC_Os06g45650	Os06g0667200	0	0	0	0.038695	0.091473	0.325371	0.0458812	74.7827	up	NA	K09264	6	NA	MADS-box transcription factor 30 isoform X1 [Oryza sativa Japonica Group]
LOC_Os05g37060.1	MYB	6.29528	0.00267625	LOC4338925	LOC_Os05g37060	Os05g0442400	0	0	0	0.147442	0.074642	0.701011	0.0464396	78.5359	up	NA	NA	1	NA	transcription factor DIVARICATA [Oryza sativa Japonica Group] &gt;EAY98215.1 hypothetical protein OsI_20126 [Oryza sativa Indica Group] &gt;KAB8099626.1 hypothetical protein EE612_029785 [Oryza sativa] &gt;AAT69605.1 putative myb-like transcription factor [Oryza sativa Japonica Group] &gt;AAU90097.1 putative myb-like transcription factor [Oryza sativa Japonica Group] &gt;EEE63882.1 hypothetical p…
LOC_Os01g19330.1	MYB	4.28178	0.00229002	LOC4326726	LOC_Os01g19330	Os01g0298400	0	0.069881	0	0.522027	0.32564	0.660975	0.0416536	19.4511	up	NA	K09422	5	NA	transcription factor MYB2-like [Oryza sativa Japonica Group] &gt;EAZ11558.1 hypothetical protein OsJ_01424 [Oryza sativa Japonica Group] &gt;KAF2949769.1 hypothetical protein DAI22_01g136300 [Oryza sativa Japonica Group] &gt;BAB55768.1 putative typical P-type R2R3 Myb protein [Oryza sativa Japonica Group] &gt;BAB67851.1 putative typical P-type R2R3 Myb protein [Oryza sativa Japonica Group] &gt;BA…
LOC_Os01g64360.1	MYB	4.02769	2.22e-25	LOC4324783	LOC_Os01g64360	Os01g0863300	1.2744	1.2021	0.723802	18.1294	26.5237	14.3731	3.38e-22	16.31	up	NA	NA	5	NA	transcription factor DIVARICATA [Oryza sativa Japonica Group] &gt;EAZ14242.1 hypothetical protein OsJ_04166 [Oryza sativa Japonica Group] &gt;KAF2953455.1 hypothetical protein DAI22_01g409600 [Oryza sativa Japonica Group]
LOC_Os02g09480.1	MYB	2.8845	5.8e-12	LOC4328551	LOC_Os02g09480	Os02g0187700	2.81584	7.07445	3.62427	27.5976	27.1401	57.8138	1.39e-09	7.38447	up	NA	K09422	9	NA	NA
LOC_Os02g40530.1	MYB	2.72724	2.03e-10	LOC4330001	LOC_Os02g40530	Os02g0618400	0.384083	0.468222	0.523868	4.4753	3.82565	2.1774	3.74e-08	6.62187	up	NA	K09422	5	NA	transcription factor MYB57 [Oryza sativa Japonica Group] &gt;EAZ23831.1 hypothetical protein OsJ_07548 [Oryza sativa Japonica Group] &gt;BAD21458.1 putative MYB transcription factor [Oryza sativa Japonica Group] &gt;BAD21600.1 putative MYB transcription factor [Oryza sativa Japonica Group] &gt;BAF09363.1 Os02g0618400 [Oryza sativa Japonica Group] &gt;BAG99431.1 unnamed protein product [Oryza sati…
LOC_Os02g41510.1	MYB	2.59587	2.19e-12	LOC4330027	LOC_Os02g41510	Os02g0624300	0.544317	0.437941	0.4774	3.7037	3.13086	3.40682	5.69e-10	6.04553	up	NA	K09422	5	NA	transcription factor MYB30-like [Oryza sativa Japonica Group] &gt;XP_052145300.1 transcription factor MYB30 [Oryza glaberrima] &gt;Q6K1S6.1 RecName: Full=Transcription factor MYB30; Short=OsMYB30 [Oryza sativa Japonica Group] &gt;EAY86754.1 hypothetical protein OsI_08134 [Oryza sativa Indica Group] &gt;KAB8088012.1 hypothetical protein EE612_012406 [Oryza sativa] &gt;EAZ23866.1 hypothetical prote…
LOC_Os06g43090.1	MYB	2.10866	3.42e-30	LOC4341607	LOC_Os06g43090	Os06g0637500	17.52	24.1037	19.9186	109.387	100.619	90.9551	8.88e-27	4.3129	up	NA	K09422	5	NA	NA
LOC_Os06g10350.1	MYB	-1.91416	3.3e-05	LOC4340430	LOC_Os06g10350	Os06g0205100	4.3197	4.75053	5.77402	1.42046	0.688839	2.43772	0.00140568	0.265326	down	NA	K09422	17	NA	anthocyanin regulatory C1 protein [Oryza sativa Japonica Group] &gt;BAD36195.1 Myb protein [Oryza sativa Japonica Group] &gt;BAF19004.1 Os06g0205100 [Oryza sativa Japonica Group]
LOC_Os04g43680.1	MYB	1.66485	7.49e-08	LOC4336407	LOC_Os04g43680	Os04g0517100	8.9919	14.1829	7.17694	30.4014	41.4723	35.9333	7.81e-06	3.17082	up	NA	K09422	5	NA	NA
LOC_Os11g47460.1;LOC_Os11g47460.2;LOC_Os11g47460.3;LOC_Os11g47460.4	MYB	-1.62808	0.00155946	LOC4351184	LOC_Os11g47460	Os11g0700500	17.7026	7.9803	18.2941	4.36329	8.70599	3.06871	0.0315983	0.323518	down	NA	K09422	8	NA	NA
LOC_Os12g37970.1;LOC_Os12g37970.2;LOC_Os12g37970.3	MYB	-1.60716	4.98e-05	LOC4352559	LOC_Os12g37970	Os12g0567300	105.939	69.8775	147.972	48.1289	49.7579	24.3349	0.00199669	0.328243	down	NA	K09422	17	NA	myb-related protein MYBAS2 isoform X1 [Oryza sativa Japonica Group]
LOC_Os01g18240.1	MYB	-1.06708	0.00223751	LOC4327914	LOC_Os01g18240	Os01g0285300	184.902	184.73	190.123	108.035	136.363	56.6723	0.0411017	0.477284	down	NA	K09422	8	NA	transcription factor MYB61 [Oryza sativa Japonica Group] &gt;KAB8081039.1 hypothetical protein EE612_001879 [Oryza sativa] &gt;EAZ11477.1 hypothetical protein OsJ_01345 [Oryza sativa Japonica Group] &gt;KAF2949694.1 hypothetical protein DAI22_01g130300 [Oryza sativa Japonica Group] &gt;BAB39972.1 putative transcription factor (myb) [Oryza sativa Japonica Group] &gt;BAB39987.1 putative MYB2 [Oryza…
LOC_Os08g06110.2;LOC_Os08g06110.3;LOC_Os08g06110.4;LOC_Os08g06110.5	MYB_related	-2.56341	6.13e-10	LOC4344703	LOC_Os08g06110	Os08g0157600	40.6147	38.6697	106.887	11.6312	12.1503	12.8006	9.88e-08	0.169176	down	NA	K12133	17	NA	protein LHY isoform X1 [Oryza sativa Japonica Group] &gt;XP_015649836.1 protein LHY isoform X1 [Oryza sativa Japonica Group] &gt;XP_015649837.1 protein LHY isoform X1 [Oryza sativa Japonica Group] &gt;XP_025875636.1 protein LHY isoform X1 [Oryza sativa Japonica Group] &gt;XP_025875637.1 protein LHY isoform X1 [Oryza sativa Japonica Group] &gt;XP_025875638.1 protein LHY isoform X1 [Oryza sativa Ja…
LOC_Os05g50340.1	MYB_related	-1.91984	3.15e-05	LOC4339715	LOC_Os05g50340	Os05g0579600	8.85675	4.72796	11.8342	2.39264	1.83288	3.56427	0.00135757	0.264284	down	GO:0005739	NA	17	mitochondrion	protein RADIALIS-like 3 [Oryza sativa Japonica Group] &gt;XP_052156390.1 protein RADIALIS-like 3 [Oryza glaberrima] &gt;EAY99166.1 hypothetical protein OsI_21125 [Oryza sativa Indica Group] &gt;KAB8100737.1 hypothetical protein EE612_031331 [Oryza sativa] &gt;EEE64813.1 hypothetical protein OsJ_19669 [Oryza sativa Japonica Group] &gt;KAF2932287.1 hypothetical protein DAI22_05g276100 [Oryza sativa…
LOC_Os02g45670.1	MYB_related	-1.38319	1.29e-05	LOC9272080	LOC_Os02g45670	Os02g0680700	37.5927	22.0325	38.1016	17.2076	15.1803	12.2787	0.000635266	0.383371	down	NA	NA	17	NA	protein REVEILLE 6 isoform X1 [Oryza sativa Japonica Group]
LOC_Os06g51260.1	MYB_related	-1.31062	0.000197134	LOC4342135	LOC_Os06g51260	Os06g0728700	24.8855	17.8397	38.0859	11.5979	14.7239	10.6727	0.0061244	0.403148	down	NA	NA	8	NA	protein REVEILLE 1 isoform X1 [Oryza sativa Japonica Group] &gt;EEE66394.1 hypothetical protein OsJ_22733 [Oryza sativa Japonica Group] &gt;KAF2928608.1 hypothetical protein DAI22_06g291600 [Oryza sativa Japonica Group] &gt;BAD61826.1 putative MYB transcription factor [Oryza sativa Japonica Group] &gt;BAD62104.1 putative MYB transcription factor [Oryza sativa Japonica Group] &gt;BAF20559.1 Os06g0…
LOC_Os03g60080.1	NAC	3.93016	3.36e-17	LOC4334553	LOC_Os03g60080	Os03g0815100	21.0368	6.97953	7.43477	262.563	206.184	160.807	1.98e-14	15.2439	up	NA	NA	5	NA	NA
LOC_Os01g60020.1	NAC	2.38839	2.96e-13	LOC4327485	LOC_Os01g60020	Os01g0816100	1.49499	1.70885	2.90049	13.3721	10.3246	13.1567	8.82e-11	5.23574	up	NA	NA	5	NA	NA
LOC_Os07g12340.1	NAC	2.0818	1.99e-09	LOC4342753	LOC_Os07g12340	Os07g0225300	10.7314	5.70282	5.86824	43.3731	36.0015	29.6246	2.89e-07	4.23336	up	NA	NA	5	NA	NAC domain-containing protein 67 [Oryza sativa Japonica Group] &gt;XP_052160972.1 NAC domain-containing protein 67 [Oryza glaberrima] &gt;Q7EZT1.1 RecName: Full=NAC domain-containing protein 67; Short=ONAC067; AltName: Full=OsNAC3 [Oryza sativa Japonica Group] &gt;KAB8104814.1 hypothetical protein EE612_037977 [Oryza sativa] &gt;KAF2922014.1 hypothetical protein DAI22_07g078500 [Oryza sativa Japo…
LOC_Os05g34830.1;LOC_Os05g34830.2;LOC_Os05g34830.3	NAC	1.73141	6.42e-05	LOC4338832	LOC_Os05g34830	Os05g0421600	3.76849	1.3525	3.415	11.8703	11.6532	9.29127	0.00248147	3.32053	up	NA	NA	5	NA	NAC domain-containing protein 48-like [Oryza sativa Japonica Group] &gt;AAT44250.1 putative no apical meristem (NAM) protein [Oryza sativa Japonica Group] &gt;KAF2930844.1 hypothetical protein DAI22_05g165700 [Oryza sativa Japonica Group]
LOC_Os01g66120.1;LOC_Os01g66120.3	NAC	1.49732	2.85e-05	LOC4325006	LOC_Os01g66120	Os01g0884300	26.8215	12.042	22.7601	71.6612	72.9888	55.7913	0.0012402	2.82318	up	NA	NA	5	NA	NAC domain-containing protein 48 [Oryza sativa Japonica Group] &gt;Q7F2L3.1 RecName: Full=NAC domain-containing protein 48; Short=ONAC048; AltName: Full=OsNAC6; AltName: Full=Protein STRESS-RESPONSIVE NAC 2 [Oryza sativa Japonica Group] &gt;KAB8084629.1 hypothetical protein EE612_007216 [Oryza sativa] &gt;AAK17067.1 NAC6 [Oryza sativa Japonica Group] &gt;ACJ54897.1 NAC6 protein [Oryza sativa Japo…
LOC_Os07g41580.1	NF-YB	-1.44169	2.51e-05	LOC4343856	LOC_Os07g41580	Os07g0606600	8.15441	11.3537	13.54	5.2162	5.3403	3.16436	0.00112876	0.368135	down	NA	K08065	17	NA	nuclear transcription factor Y subunit B-10 [Oryza sativa Japonica Group] &gt;Q69J40.1 RecName: Full=Nuclear transcription factor Y subunit B-10; Short=OsNF-YB10; AltName: Full=Transcriptional activator HAP3F; Short=OsHAP3F [Oryza sativa Japonica Group] &gt;EEC82417.1 hypothetical protein OsI_26805 [Oryza sativa Indica Group] &gt;KAB8106292.1 hypothetical protein EE612_040570 [Oryza sativa] &gt;K…
LOC_Os12g07480.1	TCP	1.02516	2.01e-06	LOC9271589	LOC_Os12g07480	Os12g0173300	4.38137	5.2653	3.77391	11.4515	10.12	9.46443	0.000129522	2.03518	up	NA	K16221	9	NA	NA
LOC_Os01g21590.1	Trihelix	2.98964	3.65e-13	LOC4327270	LOC_Os01g21590	Os01g0318400	0.93796	1.23765	0.696358	10.4199	4.15003	11.8161	1.08e-10	7.94274	up	NA	NA	20	NA	NA
LOC_Os06g44010.1	WRKY	3.77812	9.6e-05	LOC4341678	LOC_Os06g44010	Os06g0649000	0.371654	0	0.239774	1.79154	3.42926	4.65702	0.00343358	13.7192	up	NA	NA	1	NA	WRKY transcription factor WRKY28-like [Oryza sativa Japonica Group]
LOC_Os01g60600.1	WRKY	3.75789	1.78e-14	LOC9268836	LOC_Os01g60600	Os01g0821300	0.580734	0.731065	0.647522	8.49804	16.4102	4.82631	6.7e-12	13.5281	up	NA	NA	5	NA	probable WRKY transcription factor 4 [Oryza sativa Japonica Group] &gt;KAF2953040.1 hypothetical protein DAI22_01g380700 [Oryza sativa Japonica Group] &gt;BAB85299.1 WRKY transcription factor 64-like protein [Oryza sativa Japonica Group] &gt;BAB86480.1 WRKY transcription factor 64-like protein [Oryza sativa Japonica Group] &gt;BAH91359.1 Os01g0821300 [Oryza sativa Japonica Group]
LOC_Os02g08440.1;LOC_Os02g08440.2;LOC_Os02g08440.3;LOC_Os02g08440.4	WRKY	3.38953	4.01e-10	LOC4328512	LOC_Os02g08440	Os02g0181300	14.4192	3.11513	4.59663	96.8335	101.748	71.4695	6.9e-08	10.4797	up	GO:0003700;GO:0005634;GO:0006355;GO:0006952;GO:0009685;GO:0043565	NA	5	DNA-binding transcription factor activity; nucleus; regulation of transcription, DNA-templated; defense response; gibberellin metabolic process; sequence-specific DNA binding	NA
LOC_Os01g61080.1	WRKY	2.63681	2.61e-05	LOC4327518	LOC_Os01g61080	Os01g0826400	0.325601	0.069918	0.237149	1.22564	1.86001	1.50797	0.00115367	6.21953	up	GO:0003677	K13424	5	DNA binding	NA
LOC_Os05g27730.1	WRKY	2.28088	1.48e-06	LOC4338474	LOC_Os05g27730	Os05g0343400	28.8514	8.24089	13.4317	112.111	105.531	67.515	0.000100595	4.85974	up	NA	K13424	5	NA	WRKY transcription factor WRKY24 isoform X1 [Oryza sativa Japonica Group]
LOC_Os08g29660.1	WRKY	2.21155	0.000493827	LOC4345456	LOC_Os08g29660	Os08g0386200	6.50245	0.991032	2.28369	25.1305	17.5888	10.7032	0.0129076	4.63172	up	NA	NA	15	NA	probable WRKY transcription factor 54 [Oryza sativa Japonica Group] &gt;AAT84162.1 transcription factor WRKY69 [Oryza sativa Indica Group] &gt;KAB8108368.1 hypothetical protein EE612_043986 [Oryza sativa] &gt;ADX60247.1 WRKY transcription factor, partial [Oryza sativa Japonica Group] &gt;EAZ42593.1 hypothetical protein OsJ_27157 [Oryza sativa Japonica Group] &gt;KAF2919508.1 hypothetical protein …
LOC_Os05g46020.1	WRKY	2.20867	4.4e-06	LOC4339451	LOC_Os05g46020	Os05g0537100	2.67469	0.83501	2.4077	10.7789	12.5863	8.24802	0.000255784	4.62247	up	NA	NA	5	NA	probable WRKY transcription factor 50 [Oryza sativa Japonica Group] &gt;ABC02807.1 WRKY transcription factor 7 [Oryza sativa] &gt;AAT39221.1 unknown protein, contains WRKY DNA -binding domain [Oryza sativa Japonica Group] &gt;EEE64508.1 hypothetical protein OsJ_19359 [Oryza sativa Japonica Group] &gt;KAB8100367.1 hypothetical protein EE612_030876 [Oryza sativa] &gt;KAF2931846.1 hypothetical prote…
LOC_Os01g60640.1	WRKY	2.20573	6.57e-07	LOC4327611	LOC_Os01g60640	Os01g0821600	20.7867	11.6603	8.74269	69.8817	101.626	44.2627	5.16e-05	4.61307	up	NA	NA	5	NA	probable WRKY transcription factor 30 [Oryza sativa Japonica Group] &gt;KAB8084069.1 hypothetical protein EE612_006524 [Oryza sativa] &gt;KAF2953042.1 hypothetical protein DAI22_01g381100 [Oryza sativa Japonica Group] &gt;BAB85303.1 WRKY transcription factor 48-like protein [Oryza sativa Japonica Group] &gt;BAB86484.1 WRKY transcription factor 48-like protein [Oryza sativa Japonica Group] &gt;BAF…
LOC_Os09g25060.1	WRKY	2.16633	1.96e-06	LOC4347069	LOC_Os09g25060	Os09g0417600	9.49008	7.02416	10.3205	37.7821	74.0128	23.2871	0.000127148	4.48881	up	NA	NA	5	NA	WRKY transcription factor WRKY76 [Oryza sativa Japonica Group] &gt;Q6EPZ2.1 RecName: Full=WRKY transcription factor WRKY76; Short=OsWRKY76 [Oryza sativa Japonica Group] &gt;EAZ44747.1 hypothetical protein OsJ_29378 [Oryza sativa Japonica Group] &gt;BAD29278.1 putative WIZZ [Oryza sativa Japonica Group] &gt;BAF25098.1 Os09g0417600 [Oryza sativa Japonica Group] &gt;BAG87246.1 unnamed protein produc…
LOC_Os05g25770.1	WRKY	2.14469	5.35e-05	LOC4338413	LOC_Os05g25770	Os05g0322900	39.4303	11.4973	24.4287	111.934	198.039	69.953	0.00212182	4.42197	up	NA	NA	5	NA	probable WRKY transcription factor 70 [Oryza sativa Japonica Group] &gt;Q5W6D6.1 RecName: Full=Transcription factor WRKY45-1; Short=OsWRKY45-1; AltName: Full=OsWRKY45; AltName: Full=WRKY transcription factor 45-2 [Oryza sativa Japonica Group] &gt;AAV44133.1 putative WRKY transcription factor [Oryza sativa Japonica Group] &gt;AAV44172.1 putative WRKY transcription factor [Oryza sativa Japonica Gro…
LOC_Os09g16510.1	WRKY	1.7713	0.000564889	LOC4346768	LOC_Os09g16510	Os09g0334500	6.49385	2.40124	4.82449	21.5236	24.0134	8.21048	0.0142352	3.41361	up	NA	NA	5	NA	probable WRKY transcription factor 30 [Oryza sativa Japonica Group] &gt;AAT84161.1 transcription factor WRKY74 [Oryza sativa Indica Group] &gt;KAB8110132.1 hypothetical protein EE612_047066 [Oryza sativa] &gt;EAZ44315.1 hypothetical protein OsJ_28937 [Oryza sativa Japonica Group] &gt;KAF2915707.1 hypothetical protein DAI22_09g059400 [Oryza sativa Japonica Group] &gt;BAD28444.1 WRKY family transcr…
LOC_Os01g14440.1	WRKY	1.60662	5.67e-05	LOC4326760	LOC_Os01g14440	Os01g0246700	4.17115	2.09291	4.62813	13.1156	15.5833	9.32318	0.00221978	3.04538	up	GO:0003677	NA	5	DNA binding	NA
LOC_Os05g09020.1;LOC_Os05g09020.2	WRKY	1.42095	1.58e-06	LOC4337998	LOC_Os05g09020	Os05g0183100	32.9514	27.2449	23.134	100.327	94.608	59.4719	0.000105933	2.67762	up	NA	NA	5	NA	NA
LOC_Os01g09100.1	WRKY	1.3719	2.57e-05	LOC4325658	LOC_Os01g09100	Os01g0186000	1.35078	1.32309	1.45832	4.87408	3.18546	4.29292	0.0011412	2.58811	up	NA	NA	5	NA	probable WRKY transcription factor 50 [Oryza sativa Japonica Group] &gt;AAQ20913.1 WRKY13 [Oryza sativa Japonica Group] &gt;ADX60238.1 WRKY transcription factor, partial [Oryza sativa Japonica Group] &gt;EAZ10835.1 hypothetical protein OsJ_00671 [Oryza sativa Japonica Group] &gt;KAF2948815.1 hypothetical protein DAI22_01g062400 [Oryza sativa Japonica Group] &gt;BAF04157.1 Os01g0186000 [Oryza sati…
LOC_Os09g24810.1	ZF-HD	1.95794	6.44e-07	LOC4347053	LOC_Os09g24810	Os09g0414500	10.0479	16.8749	8.13795	36.8895	39.0306	78.3821	5.12e-05	3.88507	up	GO:0005739	NA	9	mitochondrion	NA
LOC_Os01g44430.1	ZF-HD	-1.57184	0.00227542	LOC9268901	LOC_Os01g44430	Os01g0635550	8.68713	3.68789	5.67136	2.06395	3.5925	1.33387	0.0414721	0.33638	down	NA	NA	10	NA	zinc-finger homeodomain protein 5 [Oryza sativa Japonica Group] &gt;XP_015622497.1 zinc-finger homeodomain protein 5 [Oryza sativa Japonica Group] &gt;Q5VM82.1 RecName: Full=Zinc-finger homeodomain protein 5; Short=OsZHD5 [Oryza sativa Japonica Group] &gt;KAB8082612.1 hypothetical protein EE612_004556 [Oryza sativa] &gt;KAF2951337.1 hypothetical protein DAI22_01g254700 [Oryza sativa Japonica Grou…

## Sheet: Sheet4
Supplementary Table 9. The list of BPH-responsive transcription factors in all comparisons
Supplementary Table 9-4. The list of BPH-responsive transcription factors in R0 vs RY6
TF_anno	Family	log2FoldChange	pvalue	id	MSU	RAP	R0_1_TPM	R0_2_TPM	R0_3_TPM	RY6_1_TPM	RY6_2_TPM	RY6_3_TPM	padj	FC	direction	GO	KO	protein_cluster	GO_des	Nr_des
LOC_Os02g40070.1	AP2	6.80375	0.00578751	LOC4329975	LOC_Os02g40070	Os02g0614300	0	0	0	0	0.44817	0.108045	0.0168332	111.721	up	GO:0005739	K09285	6	mitochondrion	AP2-like ethylene-responsive transcription factor PLT2 [Oryza sativa Japonica Group]
LOC_Os03g56050.1	AP2	5.05381	7.37e-12	LOC4334257	LOC_Os03g56050	Os03g0770700	0.033673	0.074415	0	1.12426	1.53773	1.68234	5.13e-10	33.216	up	NA	K09285	2	NA	NA
LOC_Os03g60430.1;LOC_Os03g60430.2	AP2	-1.46051	6.07e-08	LOC4334582	LOC_Os03g60430	Os03g0818800	20.2209	19.8086	21.9392	11.1073	7.81567	7.4259	1.12e-06	0.363365	down	NA	K09284	8	NA	floral homeotic protein APETALA 2 isoform X1 [Oryza sativa Japonica Group] &gt;Q84TB5.1 RecName: Full=APETALA2-like protein 2; AltName: Full=Protein INDETERMINATE SPIKELET 1; Short=OsIDS1 [Oryza sativa Japonica Group] &gt;AAO65862.1 APETALA2-like protein [Oryza sativa Japonica Group] &gt;AAW78367.1 transcription factor AP2D2 [Oryza sativa Japonica Group] &gt;KAF2942034.1 hypothetical protein DAI2…
LOC_Os04g55560.2;LOC_Os04g55560.3	AP2	-1.21689	9.5e-08	LOC9269072	LOC_Os04g55560	Os04g0649100	45.6984	46.7112	60.4601	29.1203	24.409	24.0861	1.64e-06	0.430208	down	NA	K09284	8	NA	AP2-like ethylene-responsive transcription factor TOE3 isoform X1 [Oryza sativa Japonica Group] &gt;A0A0N7KJT8.1 RecName: Full=APETALA2-like protein 5; AltName: Full=Protein SHATTERING ABORTION 1 [Oryza sativa Japonica Group] &gt;KAF2936213.1 hypothetical protein DAI22_04g286600 [Oryza sativa Japonica Group] &gt;BAS91337.1 Os04g0649100 [Oryza sativa Japonica Group]
LOC_Os04g56850.1;LOC_Os04g56850.2	ARF	2.38719	0.00201833	LOC4337309	LOC_Os04g56850	Os04g0664400	0.08941	1.76515	0.280924	2.77503	4.46356	5.7832	0.00694504	5.23137	up	GO:0005622;GO:0006417	K14486	16	intracellular; regulation of translation	auxin response factor 11-like isoform X1 [Oryza sativa Japonica Group] &gt;XP_052152973.1 auxin response factor 11 isoform X1 [Oryza glaberrima] &gt;Q01K26.2 RecName: Full=Auxin response factor 11; AltName: Full=OsARF5; AltName: Full=OsMP; AltName: Full=Protein MONOPTEROS-like [Oryza sativa Indica Group] &gt;Q8S983.1 RecName: Full=Auxin response factor 11; AltName: Full=OsARF5; AltName: Full=OsMP…
LOC_Os06g09660.1	ARF	1.1807	2.4e-12	LOC9270361	LOC_Os06g09660	Os06g0196700	11.3474	16.1015	12.2125	35.1306	38.8005	45.1956	1.91e-10	2.26686	up	NA	K14486	9	NA	auxin response factor 16 isoform X1 [Oryza sativa Japonica Group] &gt;A3B9A0.1 RecName: Full=Auxin response factor 16 [Oryza sativa Japonica Group] &gt;EAZ36139.1 hypothetical protein OsJ_20449 [Oryza sativa Japonica Group] &gt;KAF2925641.1 hypothetical protein DAI22_06g067600 [Oryza sativa Japonica Group] &gt;BAS96617.1 Os06g0196700 [Oryza sativa Japonica Group]
LOC_Os01g67770.1	ARR-B	-1.60384	1.76e-10	LOC4325022	LOC_Os01g67770	Os01g0904700	14.9147	11.8815	16.6384	5.48766	6.63548	4.8806	7.61e-09	0.329	down	NA	K14491	11	NA	two-component response regulator ORR26 isoform X1 [Oryza sativa Japonica Group] &gt;XP_052140628.1 two-component response regulator ORR26 [Oryza glaberrima] &gt;Q5N6V8.2 RecName: Full=Two-component response regulator ORR26; AltName: Full=OsRRB6 [Oryza sativa Japonica Group] &gt;KAB8084802.1 hypothetical protein EE612_007446 [Oryza sativa] &gt;EEE55842.1 hypothetical protein OsJ_04457 [Oryza sativ…
LOC_Os02g13900.1	BES1	2.17634	3.9e-07	LOC9267338	LOC_Os02g13900	Os02g0233200	0.602867	1.35238	0.750267	2.86386	5.19037	6.58249	5.39e-06	4.52006	up	NA	K14503	9	NA	NA
LOC_Os07g39220.1	BES1	1.01615	6.85e-05	LOC4343719	LOC_Os07g39220	Os07g0580500	14.0978	25.7895	17.8097	48.8525	44.4883	43.3397	0.000410802	2.02251	up	NA	K14503	9	NA	NA
LOC_Os03g17130.1	bHLH	7.33652	1.5e-05	LOC9268995	LOC_Os03g17130	Os03g0279500	0	0	0	0.114354	0.654121	0.772561	0.000115222	161.626	up	NA	NA	2	NA	transcription factor bHLH110 isoform X1 [Oryza sativa Japonica Group] &gt;XP_015630127.1 transcription factor bHLH110 isoform X1 [Oryza sativa Japonica Group] &gt;KAF2938622.1 hypothetical protein DAI22_03g131300 [Oryza sativa Japonica Group] &gt;KAF2938623.1 hypothetical protein DAI22_03g131300 [Oryza sativa Japonica Group]
LOC_Os11g39000.1;LOC_Os11g39000.2	bHLH	6.7825	7.67e-05	LOC4350872	LOC_Os11g39000	Os11g0603000	0	0	0	0.416021	0.91747	1.18332	0.000451889	110.087	up	NA	NA	18	NA	transcription factor ILI2 isoform X1 [Oryza sativa Japonica Group] &gt;B8BLA3.1 RecName: Full=Transcription factor ILI2; Short=OsILI2; AltName: Full=Protein INCREASED LEAF INCLINATION 2 [Oryza sativa Indica Group] &gt;Q2R1J3.1 RecName: Full=Transcription factor ILI2; Short=OsILI2; AltName: Full=Protein INCREASED LEAF INCLINATION 2 [Oryza sativa Japonica Group] &gt;KAB8115806.1 hypothetical protei…
LOC_Os04g23550.1;LOC_Os04g23550.2	bHLH	4.47297	2.79e-06	LOC4335417	LOC_Os04g23550	Os04g0301500	2.88962	0.480913	0.317961	36.6887	26.7968	36.722	2.83e-05	22.2074	up	NA	NA	1	NA	NA
LOC_Os02g12820.1	bHLH	-4.34202	0.00598382	LOC9269769	LOC_Os02g12820	Os02g0221100	0.086516	0.077202	0.23881	0.022728	0	0	0.0173152	0.0493084	down	NA	NA	10	NA	putative transcription factor bHLH041 [Oryza sativa Japonica Group]
LOC_Os03g46860.1	bHLH	3.74643	2.33e-09	LOC4333691	LOC_Os03g46860	Os03g0671800	0.123453	1.06151	0.22561	7.24702	8.37714	6.42715	7.01e-08	13.4211	up	GO:0005634;GO:0006355;GO:0140110	NA	20	nucleus; regulation of transcription, DNA-templated; transcription regulator activity	transcription factor NAI1 [Oryza sativa Japonica Group] &gt;KAB8092965.1 hypothetical protein EE612_019573 [Oryza sativa] &gt;ABF98126.1 Helix-loop-helix DNA-binding domain containing protein, expressed [Oryza sativa Japonica Group] &gt;ADX60274.1 bHLH transcription factor, partial [Oryza sativa Japonica Group] &gt;KAF2940602.1 hypothetical protein DAI22_03g285200 [Oryza sativa Japonica Group] &g…
LOC_Os01g38610.1	bHLH	-3.431	9.24e-14	LOC4327934	LOC_Os01g38610	Os01g0566800	19.9984	8.88659	14.5202	2.48857	1.00073	1.2094	1.12e-11	0.0927185	down	NA	NA	10	NA	transcription factor LATE FLOWERING-like [Oryza sativa Japonica Group] &gt;XP_015629741.1 transcription factor LATE FLOWERING-like [Oryza sativa Japonica Group] &gt;KAF2950805.1 hypothetical protein DAI22_01g212500 [Oryza sativa Japonica Group] &gt;KAF2950806.1 hypothetical protein DAI22_01g212500 [Oryza sativa Japonica Group] &gt;BAS72758.1 Os01g0566800 [Oryza sativa Japonica Group]
LOC_Os08g37290.1	bHLH	3.29921	0.000603992	LOC4345836	LOC_Os08g37290	Os08g0477900	0.112081	0.235565	0	0.829357	1.43238	1.7895	0.0025285	9.84374	up	NA	NA	2	NA	transcription factor AIG1 [Oryza sativa Japonica Group] &gt;KAB8108880.1 hypothetical protein EE612_044911 [Oryza sativa] &gt;KAF2920123.1 hypothetical protein DAI22_08g186800 [Oryza sativa Japonica Group] &gt;BAD09003.1 bHLH protein family-like [Oryza sativa Japonica Group] &gt;BAF23961.1 Os08g0477900 [Oryza sativa Japonica Group] &gt;BAT05896.1 Os08g0477900 [Oryza sativa Japonica Group]
LOC_Os01g50940.1	bHLH	2.48423	4.52e-13	LOC4327669	LOC_Os01g50940	Os01g0705700	1.81563	3.3577	2.37283	13.4044	11.9177	24.8624	4.47e-11	5.59537	up	NA	K25801	20	NA	transcription factor bHLH13 [Oryza sativa Japonica Group] &gt;EAZ13257.1 hypothetical protein OsJ_03182 [Oryza sativa Japonica Group] &gt;KAF2951888.1 hypothetical protein DAI22_01g295800 [Oryza sativa Japonica Group]
LOC_Os05g46370.1	bHLH	2.26233	1.29e-08	LOC9269440	LOC_Os05g46370	Os05g0541400	0.829512	0.682605	0.724293	5.22763	4.78694	2.61252	3.04e-07	4.79767	up	NA	NA	9	NA	transcription factor LATE FLOWERING [Oryza sativa Japonica Group] &gt;A0A0P0WQ90.1 RecName: Full=Transcription factor LATE FLOWERING; Short=OsLF; AltName: Full=Basic helix-loop-helix protein 119; Short=OsbHLH119 [Oryza sativa Japonica Group] &gt;BAS95124.1 Os05g0541400 [Oryza sativa Japonica Group]
LOC_Os03g53020.1	bHLH	2.24723	9.96e-09	LOC4334060	LOC_Os03g53020	Os03g0741100	2.66221	0.966891	2.10891	11.9415	11.6277	9.06314	2.45e-07	4.74772	up	NA	NA	5	NA	NA
LOC_Os03g56950.1;LOC_Os03g56950.2;LOC_Os03g56950.3;LOC_Os03g56950.4;LOC_Os03g56950.5;LOC_Os03g56950.6;LOC_Os03g56950.7	bHLH	-2.20343	1.08e-07	LOC4334324	LOC_Os03g56950	Os03g0782500	48.7023	19.8547	49.8643	13.2348	11.0798	7.5226	1.83e-06	0.217121	down	NA	K16189	10	NA	transcription factor PHYTOCHROME INTERACTING FACTOR-LIKE 13-like isoform X1 [Oryza sativa Japonica Group]
LOC_Os07g05010.1;LOC_Os07g05010.2;LOC_Os07g05010.3	bHLH	-2.09414	1.52e-18	LOC4342383	LOC_Os07g05010	Os07g0143200	39.954	31.9904	48.9233	11.45	11.4748	10.3188	7.5e-16	0.234208	down	NA	K16189	8	NA	transcription factor PHYTOCHROME INTERACTING FACTOR-LIKE 13-like isoform X1 [Oryza sativa Japonica Group] &gt;XP_015648044.1 transcription factor PHYTOCHROME INTERACTING FACTOR-LIKE 13-like isoform X1 [Oryza sativa Japonica Group] &gt;XP_015648045.1 transcription factor PHYTOCHROME INTERACTING FACTOR-LIKE 13-like isoform X1 [Oryza sativa Japonica Group] &gt;KAF2921402.1 hypothetical protein DAI22…
LOC_Os10g40740.1	bHLH	-2.04384	7.78e-08	LOC4349351	LOC_Os10g40740	Os10g0556200	31.9846	13.9251	33.8847	7.67586	10.3917	5.25467	1.39e-06	0.242517	down	GO:0005634;GO:0006355;GO:0140110	NA	10	nucleus; regulation of transcription, DNA-templated; transcription regulator activity	transcription factor UNE10 isoform X1 [Oryza sativa Japonica Group] &gt;XP_015612717.1 transcription factor UNE10 isoform X1 [Oryza sativa Japonica Group] &gt;EEC67419.1 hypothetical protein OsI_34609 [Oryza sativa Indica Group] &gt;KAB8113636.1 hypothetical protein EE612_052712 [Oryza sativa] &gt;KAF2914765.1 hypothetical protein DAI22_10g187600 [Oryza sativa Japonica Group] &gt;BAT11999.1 Os10g…
LOC_Os05g42180.1	bHLH	-2.01685	2.77e-06	LOC4339235	LOC_Os05g42180	Os05g0501200	2.23655	1.43704	2.55008	0.807521	0.495865	0.503237	2.81e-05	0.247097	down	NA	NA	10	NA	transcription factor bHLH68 isoform X1 [Oryza sativa Japonica Group]
LOC_Os02g47660.1	bHLH	1.95219	3.48e-10	LOC4330462	LOC_Os02g47660	Os02g0705500	3.09261	4.32412	3.25183	10.7244	23.266	15.4987	1.37e-08	3.86962	up	GO:0005634;GO:0006355;GO:0140110	NA	7	nucleus; regulation of transcription, DNA-templated; transcription regulator activity	transcription factor bHLH63 [Oryza sativa Japonica Group] &gt;XP_052141575.1 transcription factor bHLH63-like [Oryza glaberrima] &gt;KAB8088539.1 hypothetical protein EE612_013176 [Oryza sativa] &gt;KAF2946558.1 hypothetical protein DAI22_02g302900 [Oryza sativa Japonica Group] &gt;BAD08039.1 putative bHLH transcription factor [Oryza sativa Japonica Group] &gt;BAF09782.1 Os02g0705500 [Oryza sativ…
LOC_Os01g01840.1	bHLH	-1.9061	4.2e-10	LOC4326162	LOC_Os01g01840	Os01g0108400	45.2652	37.2873	54.0971	17.965	10.4751	14.4626	1.61e-08	0.266813	down	NA	NA	11	NA	transcription factor bHLH167 isoform X1 [Oryza sativa Japonica Group]
LOC_Os03g26210.1;LOC_Os03g26210.2;LOC_Os03g26210.3	bHLH	-1.80489	5.62e-09	LOC4332972	LOC_Os03g26210	Os03g0379300	17.3894	21.3226	28.1908	7.30716	9.92256	5.48557	1.5e-07	0.286203	down	NA	NA	12	NA	transcription factor BHLH062-like [Oryza sativa Japonica Group] &gt;XP_015633302.1 transcription factor BHLH062-like [Oryza sativa Japonica Group] &gt;Q10KL8.1 RecName: Full=Protein IRON-RELATED TRANSCRIPTION FACTOR 3; Short=OsIRO2; AltName: Full=Basic helix-loop-helix protein 63; Short=OsbHLH063; AltName: Full=Transcription factor BHLH063; AltName: Full=bHLH transcription factor bHLH063 [Oryza s…
LOC_Os01g01840.1	bHLH	-1.80334	2.53e-05	LOC9267649	LOC_Os01g01840	Os01g0108500	7.90063	4.17397	11.8754	2.64946	2.1001	3.46642	0.000177512	0.286511	down	NA	NA	19	NA	uncharacterized protein LOC9267649 [Oryza sativa Japonica Group] &gt;KAF2947965.1 hypothetical protein DAI22_01g006700 [Oryza sativa Japonica Group] &gt;BAD44857.1 unknown protein [Oryza sativa Japonica Group] &gt;BAH90853.1 Os01g0108500 [Oryza sativa Japonica Group] &gt;BAS69989.1 Os01g0108500 [Oryza sativa Japonica Group]
LOC_Os08g08160.1	bHLH	-1.79449	0.00140735	LOC9271688	LOC_Os08g08160	Os08g0179400	1.11977	0.985888	0.590295	0.365221	0.381103	0.17512	0.00514184	0.288274	down	NA	NA	10	NA	transcription factor bHLH112 isoform X1 [Oryza sativa Japonica Group] &gt;KAF2918379.1 hypothetical protein DAI22_08g054000 [Oryza sativa Japonica Group] &gt;KAF2918381.1 hypothetical protein DAI22_08g054000 [Oryza sativa Japonica Group]
LOC_Os02g49480.1	bHLH	1.76057	5.08e-08	LOC4330593	LOC_Os02g49480	Os02g0726700	1.33551	3.37887	2.40242	9.26782	8.46042	10.57	9.58e-07	3.38833	up	NA	NA	7	NA	transcription factor BIM2 [Oryza sativa Japonica Group] &gt;XP_015627559.1 transcription factor BIM2 [Oryza sativa Japonica Group] &gt;XP_015627560.1 transcription factor BIM2 [Oryza sativa Japonica Group] &gt;EEE57728.1 hypothetical protein OsJ_08226 [Oryza sativa Japonica Group] &gt;KAF2946739.1 hypothetical protein DAI22_02g317600 [Oryza sativa Japonica Group]
LOC_Os10g26460.1	bHLH	1.73173	0.00110181	LOC107277392	LOC_Os10g26460	Os10g0404300	3.63932	2.44778	1.62128	15.5372	8.09917	6.22356	0.00417185	3.32126	up	NA	NA	16	NA	transcription factor ILI7 [Oryza sativa Japonica Group] &gt;Q338G6.1 RecName: Full=Transcription factor ILI7; Short=OsILI7; AltName: Full=Basic helix-loop-helix protein 173; Short=OsbHLH173; AltName: Full=Protein INCREASED LEAF INCLINATION 7; AltName: Full=bHLH transcription factor bHLH173 [Oryza sativa Japonica Group] &gt;ABB47567.1 hypothetical protein LOC_Os10g26460 [Oryza sativa Japonica Grou…
LOC_Os06g50900.1	bHLH	1.63695	0.000149323	LOC9271931	LOC_Os06g50900	Os06g0724800	2.3887	9.51914	4.09537	16.625	19.5211	22.05	0.000787381	3.11008	up	NA	NA	2	NA	transcription factor bHLH93 [Oryza sativa Japonica Group] &gt;EEC81330.1 hypothetical protein OsI_24504 [Oryza sativa Indica Group] &gt;KAF2928565.1 hypothetical protein DAI22_06g288300 [Oryza sativa Japonica Group]
LOC_Os11g32100.1	bHLH	1.62109	0.00453785	LOC4350609	LOC_Os11g32100	Os11g0523700	4.18017	41.1522	24.3848	87.7911	73.239	86.5757	0.0137408	3.07607	up	NA	NA	2	NA	transcription factor ICE1 [Oryza sativa Japonica Group] &gt;KAB8115394.1 hypothetical protein EE612_055832 [Oryza sativa] &gt;ABA93991.1 Helix-loop-helix DNA-binding domain containing protein, expressed [Oryza sativa Japonica Group] &gt;KAF2911053.1 hypothetical protein DAI22_11g148800 [Oryza sativa Japonica Group] &gt;BAF28350.2 Os11g0523700 [Oryza sativa Japonica Group] &gt;BAT14228.1 Os11g0523…
LOC_Os09g34330.1	bHLH	-1.59097	0.00115942	LOC4347601	LOC_Os09g34330	Os09g0519100	1.45524	1.13122	1.49011	0.637119	0.612067	0.354014	0.00435167	0.331947	down	NA	NA	8	NA	transcription factor MYC2 [Oryza sativa Japonica Group] &gt;XP_052168298.1 transcription factor MYC2-like [Oryza glaberrima] &gt;EAZ09780.1 hypothetical protein OsI_32068 [Oryza sativa Indica Group] &gt;KAF2917099.1 hypothetical protein DAI22_09g167500 [Oryza sativa Japonica Group] &gt;BAD34411.1 putative MYC-related DNA binding protein [Oryza sativa Japonica Group] &gt;BAD54698.1 putative MYC-re…
LOC_Os03g08930.1	bHLH	1.53045	0.0102295	LOC4331887	LOC_Os03g08930	Os03g0188400	1.47988	5.50168	1.07984	4.77698	8.94589	13.8743	0.0270287	2.88876	up	NA	NA	2	NA	transcription factor bHLH96 [Oryza sativa Japonica Group] &gt;AAN64142.1 Unknown protein [Oryza sativa Japonica Group] &gt;ABF94380.1 Helix-loop-helix DNA-binding domain containing protein, expressed [Oryza sativa Japonica Group] &gt;ADX60278.1 bHLH transcription factor, partial [Oryza sativa Japonica Group] &gt;KAF2937705.1 hypothetical protein DAI22_03g068800 [Oryza sativa Japonica Group] &gt;B…
LOC_Os03g55550.1	bHLH	1.50076	0.0115296	LOC107276337	LOC_Os03g55550	Os03g0764200	0.080558	0.089851	0.090925	0.408179	0.317575	0.176672	0.0298753	2.82992	up	NA	NA	1	NA	transcription factor BHLH089-like isoform X1 [Oryza sativa Japonica Group] &gt;XP_025879771.1 transcription factor BHLH089-like isoform X1 [Oryza sativa Japonica Group] &gt;KAF2941475.1 hypothetical protein DAI22_03g349500 [Oryza sativa Japonica Group]
LOC_Os04g23440.1	bHLH	-1.33388	1.33e-11	LOC9269507	LOC_Os04g23440	Os04g0300600	16.6018	15.3182	16.6399	7.88759	7.45521	7.49076	8.41e-10	0.396701	down	NA	NA	10	NA	transcription factor bHLH35 [Oryza sativa Japonica Group] &gt;KAF2933255.1 hypothetical protein DAI22_04g068400 [Oryza sativa Japonica Group]
LOC_Os03g07540.1	bHLH	1.31407	0.00608244	LOC4331778	LOC_Os03g07540	Os03g0171700	4.26889	17.7606	8.52266	39.2678	24.4914	23.254	0.0175587	2.48642	up	NA	NA	20	NA	NA
LOC_Os03g58330.1	bHLH	-1.29302	3.63e-06	LOC4334429	LOC_Os03g58330	Os03g0797600	30.7457	20.632	30.4828	15.0856	12.1109	12.3107	3.52e-05	0.408096	down	NA	NA	11	NA	transcription factor UNE12 isoform X1 [Oryza sativa Japonica Group] &gt;XP_052150139.1 transcription factor UNE12-like [Oryza glaberrima] &gt;EEC76334.1 hypothetical protein OsI_13903 [Oryza sativa Indica Group] &gt;KAB8093992.1 hypothetical protein EE612_021015 [Oryza sativa] &gt;AAP44685.1 unknown protein [Oryza sativa Japonica Group] &gt;ABF99356.1 Lipoamide dehydrogenase, putative, expressed …
LOC_Os08g37730.1	bHLH	1.29064	5.06e-07	LOC4345867	LOC_Os08g37730	Os08g0483900	2.29454	1.78625	2.29391	5.61389	6.56211	6.47928	6.69e-06	2.44637	up	NA	NA	9	NA	transcription factor bHLH96 [Oryza sativa Japonica Group] &gt;KAB8108924.1 hypothetical protein EE612_044968 [Oryza sativa] &gt;ADX60273.1 bHLH transcription factor, partial [Oryza sativa Japonica Group] &gt;KAF2920170.1 hypothetical protein DAI22_08g190700 [Oryza sativa Japonica Group] &gt;BAD09301.1 putative basic-helix-loop-helix (bHLH)transcription factor [Oryza sativa Japonica Group] &gt;BAD…
LOC_Os10g23050.1	bHLH	1.26811	0.00855185	LOC4348490	LOC_Os10g23050	Os10g0376900	1.06923	2.99581	1.50939	2.83211	5.36693	7.8254	0.0233494	2.40846	up	NA	NA	7	NA	transcription factor bHLH96 [Oryza sativa Japonica Group] &gt;KAB8112544.1 hypothetical protein EE612_051020 [Oryza sativa] &gt;AAM08539.1 Putative helix-loop-helix DNA-binding protein [Oryza sativa Japonica Group] &gt;AAP53429.1 Helix-loop-helix DNA-binding domain containing protein, expressed [Oryza sativa Japonica Group] &gt;EAZ15885.1 hypothetical protein OsJ_31307 [Oryza sativa Japonica Grou…
LOC_Os03g43810.1	bHLH	-1.25158	1.42e-06	LOC9270162	LOC_Os03g43810	Os03g0639300	17.1306	14.4418	22.7156	8.26351	10.8094	8.14657	1.59e-05	0.419987	down	NA	K16189	8	NA	transcription factor PHYTOCHROME INTERACTING FACTOR-LIKE 13-like isoform X1 [Oryza sativa Japonica Group]
LOC_Os01g57580.1	bHLH	-1.24706	0.000128671	LOC4327040	LOC_Os01g57580	Os01g0784900	2.2201	3.10989	2.88554	1.60886	1.15311	1.29475	0.000695398	0.421305	down	NA	NA	10	NA	transcription factor bHLH123 [Oryza sativa Japonica Group] &gt;KAF2952664.1 hypothetical protein DAI22_01g351600 [Oryza sativa Japonica Group] &gt;BAD53363.1 bHLH transcription factor-like protein [Oryza sativa Japonica Group] &gt;BAF06379.2 Os01g0784900 [Oryza sativa Japonica Group]
LOC_Os01g39330.1	bHLH	1.22735	0.00179173	LOC4326315	LOC_Os01g39330	Os01g0575200	1.24917	2.05291	1.42896	5.51098	4.72994	2.66638	0.00629441	2.34137	up	GO:0005634;GO:0006355;GO:0140110	NA	5	nucleus; regulation of transcription, DNA-templated; transcription regulator activity	putative transcription factor bHLH041 [Oryza sativa Japonica Group] &gt;EEC70936.1 hypothetical protein OsI_02527 [Oryza sativa Indica Group] &gt;KAB8081965.1 hypothetical protein EE612_003634 [Oryza sativa] &gt;EEE54848.1 hypothetical protein OsJ_02312 [Oryza sativa Japonica Group] &gt;KAF2950848.1 hypothetical protein DAI22_01g216900 [Oryza sativa Japonica Group] &gt;BAB90265.1 basic helix-loop…
LOC_Os02g35660.1	bHLH	-1.17328	0.00274684	LOC4329698	LOC_Os02g35660	Os02g0564700	2.04987	2.59683	2.56858	1.38013	1.62763	0.754583	0.00900344	0.443413	down	NA	NA	8	NA	transcription factor bHLH68 [Oryza sativa Japonica Group] &gt;KAB8087536.1 hypothetical protein EE612_011840 [Oryza sativa] &gt;EEE57212.1 hypothetical protein OsJ_07173 [Oryza sativa Japonica Group] &gt;KAF2945368.1 hypothetical protein DAI22_02g212400 [Oryza sativa Japonica Group] &gt;BAD15821.1 putative bHLH transcription factor PTF1 [Oryza sativa Japonica Group] &gt;BAH01152.1 unnamed protein…
LOC_Os08g42470.1	bHLH	1.13478	0.00991721	LOC4346166	LOC_Os08g42470	Os08g0536800	5.01844	20.4676	7.85892	26.5781	27.4964	31.1341	0.0263606	2.19586	up	NA	NA	16	NA	transcription factor bHLH137 isoform X1 [Oryza sativa Japonica Group] &gt;EAZ07795.1 hypothetical protein OsI_30053 [Oryza sativa Indica Group] &gt;EAZ43484.1 hypothetical protein OsJ_28098 [Oryza sativa Japonica Group] &gt;KAF2920698.1 hypothetical protein DAI22_08g231000 [Oryza sativa Japonica Group]
LOC_Os06g06900.1	bHLH	-1.08847	0.0062091	LOC4340229	LOC_Os06g06900	Os06g0164400	7.57978	3.78325	6.88654	3.96306	2.85637	3.38185	0.0178606	0.470259	down	NA	NA	14	NA	LOW QUALITY PROTEIN: transcription factor PHYTOCHROME INTERACTING FACTOR-LIKE 15-like [Oryza sativa Japonica Group]
LOC_Os06g12210.1	bHLH	1.05611	0.00473419	LOC4340551	LOC_Os06g12210	Os06g0226500	1.94864	3.56995	1.62377	5.95423	4.80784	6.70784	0.0142448	2.07932	up	GO:0009536	NA	2	plastid	transcription factor ILI4 [Oryza sativa Japonica Group] &gt;XP_052159774.1 transcription factor ILI4 [Oryza glaberrima] &gt;A2YAW8.1 RecName: Full=Transcription factor ILI4; AltName: Full=Basic helix-loop-helix protein 172; AltName: Full=Protein INCREASED LEAF INCLINATION 4; AltName: Full=bHLH transcription factor bHLH172 [Oryza sativa Indica Group] &gt;Q0DDF6.1 RecName: Full=Transcription factor…
LOC_Os02g51320.1	bHLH	1.00895	0.000393095	LOC4330725	LOC_Os02g51320	Os02g0747900	12.4812	20.7957	21.0105	48.9301	44.2166	34.828	0.00177009	2.01245	up	NA	NA	2	NA	transcription factor ILI5 [Oryza sativa Japonica Group] &gt;XP_052141720.1 transcription factor ILI5 [Oryza glaberrima] &gt;A2X9L8.1 RecName: Full=Transcription factor ILI5; AltName: Full=Basic helix-loop-helix protein 170; AltName: Full=Protein INCREASED LEAF INCLINATION 5; AltName: Full=Protein POSITIVE REGULATOR OF GRAIN LENGTH 2; AltName: Full=bHLH transcription factor bHLH170 [Oryza sativa I…
LOC_Os05g41280.1	bZIP	5.84571	0.00647156	LOC107276263	LOC_Os05g41280	Os05g0492000	0	0	0	0.082739	0.029661	0.186934	0.0185038	57.5088	up	NA	K14431	3	NA	transcription factor TGAL1-like isoform X2 [Oryza sativa Japonica Group]
LOC_Os01g55150.1	bZIP	2.58366	7.3e-16	LOC4325139	LOC_Os01g55150	Os01g0756200	7.6681	19.8165	10.7258	79.4949	97.6959	92.1648	1.73e-13	5.99458	up	NA	NA	9	NA	basic leucine zipper 6 isoform X2 [Oryza sativa Japonica Group]
LOC_Os04g41820.1	bZIP	2.57687	6.6e-07	LOC4336273	LOC_Os04g41820	Os04g0495500	0.879624	5.26993	2.20501	14.8776	17.6397	25.8962	8.32e-06	5.96644	up	GO:0031410	K20557	2	cytoplasmic vesicle	transcription factor RF2a-like [Oryza sativa Japonica Group] &gt;EAZ31218.1 hypothetical protein OsJ_15316 [Oryza sativa Japonica Group] &gt;CAD41260.1 OSJNBa0067K08.2 [Oryza sativa Japonica Group]
LOC_Os02g14910.1	bZIP	2.46227	7.41e-11	LOC4328871	LOC_Os02g14910	Os02g0247100	2.66869	8.33851	6.17804	41.4648	34.5486	34.2103	3.66e-09	5.51083	up	NA	NA	9	NA	NA
LOC_Os08g38020.1	bZIP	-2.39549	0.000147839	LOC4345889	LOC_Os08g38020	Os08g0487100	1.81779	0.907857	0.909828	0.26729	0.388788	0.163296	0.000780792	0.190058	down	NA	K25786	17	NA	NA
LOC_Os09g29820.1	bZIP	-1.80619	0.000451875	LOC4347354	LOC_Os09g29820	Os09g0474000	1.88261	1.54168	2.89781	0.812526	0.58556	0.717935	0.00198158	0.285945	down	NA	K25786	17	NA	basic leucine zipper 8 [Oryza sativa Japonica Group] &gt;KAB8110974.1 hypothetical protein EE612_048481 [Oryza sativa] &gt;EEE58832.1 hypothetical protein OsJ_10404 [Oryza sativa Japonica Group] &gt;KAF2916660.1 hypothetical protein DAI22_09g136000 [Oryza sativa Japonica Group] &gt;BAD34342.1 unknown protein [Oryza sativa Japonica Group] &gt;BAF25368.1 Os09g0474000 [Oryza sativa Japonica Group]
LOC_Os01g11350.1	bZIP	1.78105	5.46e-05	LOC4325565	LOC_Os01g11350	Os01g0211800	3.00326	13.4521	9.78593	37.2122	34.4408	33.1858	0.000340686	3.43677	up	NA	NA	9	NA	NA
LOC_Os01g58760.1	bZIP	-1.73851	1.44e-05	LOC107278258	LOC_Os01g58760	Os01g0801901	6.86767	3.40688	4.80935	1.52357	2.5572	1.34167	0.000111206	0.299678	down	NA	K25785	8	NA	basic leucine zipper 23 [Oryza sativa Japonica Group] &gt;XP_015618034.1 basic leucine zipper 23 [Oryza sativa Japonica Group] &gt;XP_052153223.1 basic leucine zipper 23-like [Oryza glaberrima] &gt;XP_052153230.1 basic leucine zipper 23-like [Oryza glaberrima] &gt;KAB8083920.1 hypothetical protein EE612_006319 [Oryza sativa] &gt;KAF2952842.1 hypothetical protein DAI22_01g366800 [Oryza sativa Japo…
LOC_Os06g15480.1;LOC_Os06g15480.2	bZIP	1.70683	0.000729259	LOC4340708	LOC_Os06g15480	Os06g0265400	0.357002	1.01486	0.70909	1.29495	3.56452	3.35989	0.00295823	3.26443	up	NA	K14431	2	NA	transcription factor TGAL3-like isoform X3 [Oryza sativa Japonica Group]
LOC_Os06g41100.1	bZIP	-1.69307	0.000978048	LOC4341530	LOC_Os06g41100	Os06g0614100	4.68227	1.32022	3.31259	1.3075	1.14468	0.821525	0.00378216	0.309268	down	NA	K14431	8	NA	transcription factor TGAL8 isoform X1 [Oryza sativa Japonica Group]
LOC_Os07g48180.1	bZIP	1.69217	7.32e-05	LOC4344292	LOC_Os07g48180	Os07g0679500	2.27981	9.23259	4.94114	18.0931	18.9456	25.2348	0.000434478	3.23143	up	NA	K20557	2	NA	transcription factor RF2b-like [Oryza sativa Japonica Group]
LOC_Os03g21800.1;LOC_Os03g21800.2	bZIP	1.66807	2.49e-08	LOC4332761	LOC_Os03g21800	Os03g0336200	5.51171	12.9666	9.89464	30.8428	36.0821	39.3312	5.33e-07	3.17788	up	NA	K20557	9	NA	NA
LOC_Os01g36220.1	bZIP	-1.54159	5e-08	LOC4326871	LOC_Os01g36220	Os01g0542700	8.41648	8.32127	5.61164	3.02384	3.39186	2.66257	9.47e-07	0.343508	down	GO:0003677;GO:0005634;GO:0006355;GO:0009536	K25786	8	DNA binding; nucleus; regulation of transcription, DNA-templated; plastid	ocs element-binding factor 1 [Oryza sativa Japonica Group] &gt;KAF2950607.1 hypothetical protein DAI22_01g199800 [Oryza sativa Japonica Group] &gt;BAB89252.1 unknown protein [Oryza sativa Japonica Group] &gt;BAC10897.1 unknown protein [Oryza sativa Japonica Group] &gt;BAF05187.1 Os01g0542700 [Oryza sativa Japonica Group] &gt;BAG98976.1 unnamed protein product [Oryza sativa Japonica Group]
LOC_Os09g10840.1;LOC_Os09g10840.2	bZIP	-1.45844	0.00145017	LOC4346610	LOC_Os09g10840	Os09g0280500	4.20158	2.7441	2.83126	1.83928	1.50566	0.719491	0.00528238	0.363887	down	NA	K14431	8	NA	transcription factor TGAL7 isoform X1 [Oryza sativa Japonica Group] &gt;EAZ44039.1 hypothetical protein OsJ_28661 [Oryza sativa Japonica Group] &gt;KAF2915431.1 hypothetical protein DAI22_09g033700 [Oryza sativa Japonica Group]
LOC_Os02g10860.1	bZIP	-1.44864	1.36e-07	LOC4328662	LOC_Os02g10860	Os02g0203000	41.9946	43.9415	53.5648	23.4253	21.8665	14.8518	2.22e-06	0.366367	down	GO:0009536	K16241	8	plastid	transcription factor HY5 [Oryza sativa Japonica Group] &gt;KAB8086364.1 hypothetical protein EE612_009594 [Oryza sativa] &gt;BAS77535.1 Os02g0203000 [Oryza sativa Japonica Group]
LOC_Os10g38820.1	bZIP	1.4399	0.00297079	LOC4349212	LOC_Os10g38820	Os10g0531900	0.217283	0.685929	0.625634	1.31886	1.68803	1.63072	0.00961109	2.71303	up	NA	K20557	6	NA	NA
LOC_Os03g20650.1	bZIP	-1.35926	1.16e-08	LOC107277499	LOC_Os03g20650	Os03g0322700	5.83038	8.0934	8.08594	3.30569	3.56858	3.26545	2.8e-07	0.389781	down	NA	K14432	17	NA	ABSCISIC ACID-INSENSITIVE 5-like protein 2 [Oryza sativa Japonica Group] &gt;XP_052149537.1 ABSCISIC ACID-INSENSITIVE 5-like protein 2 [Oryza glaberrima] &gt;KAF2939013.1 hypothetical protein DAI22_03g160500 [Oryza sativa Japonica Group]
LOC_Os02g33560.1	bZIP	1.2252	0.000401449	LOC4329583	LOC_Os02g33560	Os02g0538900	3.69439	9.19058	5.56292	12.049	17.9419	21.1471	0.00179956	2.33788	up	NA	NA	2	NA	basic leucine zipper 34 [Oryza sativa Japonica Group] &gt;AEP20528.1 b-zip protein [Oryza sativa Japonica Group] &gt;KAF2945174.1 hypothetical protein DAI22_02g198400 [Oryza sativa Japonica Group] &gt;BAD27924.1 bZIP protein-like [Oryza sativa Japonica Group] &gt;BAD28835.1 bZIP protein-like [Oryza sativa Japonica Group] &gt;BAF08969.1 Os02g0538900 [Oryza sativa Japonica Group]
LOC_Os03g03550.1	bZIP	1.17098	0.00131046	LOC4331479	LOC_Os03g03550	Os03g0127500	1.53375	3.32463	3.95377	7.93763	8.21546	7.21535	0.00483553	2.25165	up	GO:0003677;GO:0005634;GO:0006355	K20557	9	DNA binding; nucleus; regulation of transcription, DNA-templated	transcription factor RF2b-like [Oryza sativa Japonica Group] &gt;KAB8090003.1 hypothetical protein EE612_015057 [Oryza sativa] &gt;AAM19114.1 Putative bZIP transcription factor [Oryza sativa Japonica Group] &gt;ABF93766.1 bZIP family transcription factor, putative, expressed [Oryza sativa Japonica Group] &gt;KAF2937067.1 hypothetical protein DAI22_03g023100 [Oryza sativa Japonica Group] &gt;BAF10…
LOC_Os08g43090.1	bZIP	1.13886	6.17e-10	LOC4346208	LOC_Os08g43090	Os08g0543900	8.15196	10.7232	9.24362	20.2617	25.3205	28.1322	2.23e-08	2.20207	up	NA	K20557	20	NA	transcription factor VIP1 [Oryza sativa Japonica Group] &gt;KAB8109434.1 hypothetical protein EE612_045703 [Oryza sativa] &gt;KAF2920767.1 hypothetical protein DAI22_08g236400 [Oryza sativa Japonica Group] &gt;BAF24317.2 Os08g0543900 [Oryza sativa Japonica Group] &gt;BAT06521.1 Os08g0543900 [Oryza sativa Japonica Group]
LOC_Os09g28310.1	bZIP	-1.08808	4.88e-07	LOC4347257	LOC_Os09g28310	Os09g0456200	31.8258	25.9615	35.4414	17.6685	17.3118	17.1706	6.49e-06	0.470386	down	NA	K14432	8	NA	bZIP transcription factor TRAB1-like [Oryza sativa Japonica Group] &gt;KAF2916521.1 hypothetical protein DAI22_09g125500 [Oryza sativa Japonica Group] &gt;BAD38293.1 putative bZIP transcription factor ABI5 [Oryza sativa Japonica Group] &gt;BAD38466.1 putative bZIP transcription factor ABI5 [Oryza sativa Japonica Group] &gt;BAF25276.1 Os09g0456200 [Oryza sativa Japonica Group] &gt;BAG89716.1 unnam…
LOC_Os07g48660.1	bZIP	1.0644	0.006791	LOC4344334	LOC_Os07g48660	Os07g0686100	1.25767	0.808301	1.27294	3.10689	2.8832	2.32941	0.0192684	2.0913	up	NA	K14432	2	NA	ABSCISIC ACID-INSENSITIVE 5-like protein 5 [Oryza sativa Japonica Group] &gt;KAF2924585.1 hypothetical protein DAI22_07g278300 [Oryza sativa Japonica Group] &gt;BAF22595.1 Os07g0686100 [Oryza sativa Japonica Group] &gt;BAG99081.1 unnamed protein product [Oryza sativa Japonica Group] &gt;BAT03287.1 Os07g0686100 [Oryza sativa Japonica Group]
LOC_Os02g49560.1	bZIP	1.04703	0.00920145	LOC107275625	LOC_Os02g49560	Os02g0728001	1.01231	1.0821	1.05365	2.35137	3.12315	2.33642	0.0247867	2.06627	up	NA	K25786	6	NA	basic leucine zipper 43 [Oryza sativa Japonica Group] &gt;XP_052142673.1 basic leucine zipper 43-like [Oryza glaberrima] &gt;EAY87376.1 hypothetical protein OsI_08779 [Oryza sativa Indica Group] &gt;KAB8088724.1 hypothetical protein EE612_013428 [Oryza sativa] &gt;EAZ24479.1 hypothetical protein OsJ_08237 [Oryza sativa Japonica Group] &gt;KAF2946750.1 hypothetical protein DAI22_02g318400 [Oryza s…
LOC_Os05g49420.1	bZIP	1.01418	0.00188802	LOC4339653	LOC_Os05g49420	Os05g0569300	14.5501	11.2686	15.1017	17.7807	40.1039	42.6013	0.00657951	2.01975	up	NA	K09060	9	NA	common plant regulatory factor 1 [Oryza sativa Japonica Group] &gt;AAT93931.1 putative bZIP protein [Oryza sativa Japonica Group] &gt;AAU10677.1 putative G-box binding factor [Oryza sativa Japonica Group] &gt;KAF2932181.1 hypothetical protein DAI22_05g268200 [Oryza sativa Japonica Group] &gt;BAF18276.1 Os05g0569300 [Oryza sativa Japonica Group] &gt;BAS95406.1 Os05g0569300 [Oryza sativa Japonica G…
LOC_Os04g54474.1;LOC_Os04g54474.2;LOC_Os04g54474.3	bZIP	-1.01055	8.32e-07	LOC9270267	LOC_Os04g54474	Os04g0637000	12.1935	11.4464	14.8848	7.74803	8.09208	7.35362	1.01e-05	0.496357	down	NA	K14431	12	NA	transcription factor TGAL6 isoform X1 [Oryza sativa Japonica Group] &gt;XP_015636711.1 transcription factor TGAL6 isoform X1 [Oryza sativa Japonica Group] &gt;XP_015636712.1 transcription factor TGAL6 isoform X1 [Oryza sativa Japonica Group] &gt;XP_025880677.1 transcription factor TGAL6 isoform X1 [Oryza sativa Japonica Group] &gt;XP_052152900.1 transcription factor TGAL6 isoform X1 [Oryza glaber…
LOC_Os12g09250.1	bZIP	1.0084	2.26e-05	LOC4351714	LOC_Os12g09250	Os12g0194600	5.5847	9.53787	8.56099	18.435	18.4471	19.3418	0.000162487	2.01168	up	GO:0005739	NA	9	mitochondrion	uncharacterized protein At4g06598 [Oryza sativa Japonica Group] &gt;XP_025877630.1 uncharacterized protein At4g06598 [Oryza sativa Japonica Group] &gt;KAB8116882.1 hypothetical protein EE612_058249 [Oryza sativa] &gt;KAF2907007.1 hypothetical protein DAI22_12g063600 [Oryza sativa Japonica Group] &gt;KAF2907008.1 hypothetical protein DAI22_12g063600 [Oryza sativa Japonica Group] &gt;KAF2907009.1 h…
LOC_Os04g08290.1	C2H2	-7.36869	8.43e-06	LOC9271610	LOC_Os04g08290	Os04g0165200	0.243787	0.352639	0.417313	0	0	0	7.08e-05	0.00605065	down	NA	NA	10	NA	protein SENSITIVE TO PROTON RHIZOTOXICITY 2 [Oryza sativa Japonica Group]
LOC_Os01g63980.1	C2H2	2.91471	0.00468564	LOC4325059	LOC_Os01g63980	Os01g0859100	0	0.085188	0.039577	0.367408	0.459597	0.457259	0.0141178	7.54076	up	NA	NA	5	NA	protein TRANSPARENT TESTA 1 [Oryza sativa Japonica Group] &gt;XP_052135727.1 protein TRANSPARENT TESTA 1-like [Oryza glaberrima] &gt;KAB8084387.1 hypothetical protein EE612_006944 [Oryza sativa] &gt;KAF2953409.1 hypothetical protein DAI22_01g406900 [Oryza sativa Japonica Group] &gt;BAF06778.1 Os01g0859100 [Oryza sativa Japonica Group] &gt;BAG89073.1 unnamed protein product [Oryza sativa Japonica …
LOC_Os03g32230.1	C2H2	2.80208	8.74e-06	LOC4333197	LOC_Os03g32230	Os03g0437200	0.398861	0.142803	0.13269	1.51912	1.76296	2.78765	7.3e-05	6.97444	up	NA	NA	5	NA	zinc finger protein 36-like [Oryza sativa Japonica Group] &gt;Q75KE5.1 RecName: Full=Zinc finger protein 36; AltName: Full=Protein BROAD-SPECTRUM RESISTANCE DIGU 1 [Oryza sativa Japonica Group] &gt;EAY90588.1 hypothetical protein OsI_12190 [Oryza sativa Indica Group] &gt;KAB8092319.1 hypothetical protein EE612_018309 [Oryza sativa] &gt;AAR89021.1 C2H2-type zinc finger protein ZFP36 [Oryza sativa …
LOC_Os01g57020.1	C2H2	-2.58652	0.000424607	LOC9270515	LOC_Os01g57020	Os01g0778100	0.195761	0.445095	0.628512	0.055594	0.075853	0.116556	0.00188363	0.166486	down	NA	NA	8	NA	protein UPSTREAM OF FLC [Oryza sativa Japonica Group] &gt;XP_025877314.1 protein UPSTREAM OF FLC [Oryza sativa Japonica Group] &gt;KAF2952594.1 hypothetical protein DAI22_01g346700 [Oryza sativa Japonica Group]
LOC_Os03g15790.1	C2H2	2.5587	5.23e-05	LOC4332342	LOC_Os03g15790	Os03g0264600	0.498224	6.21476	2.00997	14.9792	19.5931	25.2791	0.000328748	5.89176	up	NA	NA	9	NA	NA
LOC_Os01g62130.1	C2H2	-2.3378	0.000207161	LOC4327377	LOC_Os01g62130	Os01g0838600	1.75767	0.741477	0.99621	0.267444	0.185314	0.359695	0.0010421	0.197811	down	NA	NA	10	NA	zinc finger protein ZAT12 [Oryza sativa Japonica Group] &gt;KAB8084217.1 hypothetical protein EE612_006713 [Oryza sativa] &gt;KAF2953210.1 hypothetical protein DAI22_01g393200 [Oryza sativa Japonica Group] &gt;BAD81695.1 zinc finger transcription factor ZFP19 [Oryza sativa Japonica Group] &gt;BAF06661.2 Os01g0838600 [Oryza sativa Japonica Group] &gt;BAS75135.1 Os01g0838600 [Oryza sativa Japonica …
LOC_Os07g44640.1	C2H2	1.75135	1.42e-06	LOC4344057	LOC_Os07g44640	Os07g0640000	1.70736	4.23529	1.85883	8.38608	10.2788	12.3305	1.59e-05	3.36674	up	NA	K11436	16	NA	probable protein arginine N-methyltransferase 3 [Oryza sativa Japonica Group] &gt;A3BMN9.1 RecName: Full=Probable protein arginine N-methyltransferase 3 [Oryza sativa Japonica Group] &gt;EAZ40828.1 hypothetical protein OsJ_25304 [Oryza sativa Japonica Group]
LOC_Os01g57650.1	C2H2	1.71682	0.000736671	LOC4327046	LOC_Os01g57650	Os01g0785900	1.50631	9.89746	6.59043	20.8619	22.6723	25.5177	0.00298235	3.28712	up	NA	NA	2	NA	NA
LOC_Os01g65080.1;LOC_Os01g65080.2;LOC_Os01g65080.3;LOC_Os01g65080.4	C2H2	-1.5638	1.79e-05	LOC4324940	LOC_Os01g65080	Os01g0871200	130.387	50.9726	95.785	29.9715	48.0577	34.3844	0.00013312	0.33826	down	NA	NA	8	NA	NA
LOC_Os05g51830.1	C2H2	1.40939	1.76e-05	LOC4339823	LOC_Os05g51830	Os05g0597100	56.9598	118.562	52.4191	198.977	208.393	306.64	0.000131104	2.65624	up	NA	NA	20	NA	histone deacetylase HDT2 [Oryza sativa Japonica Group] &gt;EEE64928.1 hypothetical protein OsJ_19788 [Oryza sativa Japonica Group] &gt;BAF18437.1 Os05g0597100 [Oryza sativa Japonica Group] &gt;BAG93172.1 unnamed protein product [Oryza sativa Japonica Group] &gt;BAS95687.1 Os05g0597100 [Oryza sativa Japonica Group]
LOC_Os04g46680.1	C2H2	-1.35948	0.0018674	LOC4336606	LOC_Os04g46680	Os04g0552700	0.972192	1.71664	1.34545	0.740394	0.56387	0.521713	0.00651904	0.389722	down	GO:0005739	NA	11	mitochondrion	zinc finger protein ZAT1 [Oryza sativa Japonica Group]
LOC_Os02g57790.1	C2H2	-1.14634	0.000528878	LOC107277956	LOC_Os02g57790	Os02g0823900	2.54318	2.62666	4.0394	1.74241	1.53215	1.66396	0.00226452	0.451769	down	NA	NA	8	NA	zinc finger protein ZAT5 [Oryza sativa Japonica Group] &gt;KAB8089593.1 hypothetical protein EE612_014563 [Oryza sativa] &gt;KAF2947726.1 hypothetical protein DAI22_02g389700 [Oryza sativa Japonica Group] &gt;BAD22859.1 putative finger protein EPF1 [Oryza sativa Japonica Group] &gt;BAD22927.1 putative finger protein EPF1 [Oryza sativa Japonica Group] &gt;BAS81665.1 Os02g0823900 [Oryza sativa Japo…
LOC_Os06g07020.1	C2H2	-1.03895	2.62e-07	LOC4340243	LOC_Os06g07020	Os06g0166200	12.4929	10.5084	10.6137	5.74203	6.69057	7.10607	3.83e-06	0.486682	down	GO:0009536	NA	14	plastid	uncharacterized protein LOC4340243 [Oryza sativa Japonica Group]
LOC_Os10g25220.1	C3H	1.57579	0.00477963	LOC4348530	LOC_Os10g25220	Os10g0391300	0.520553	2.64986	0.794017	2.98868	4.42272	6.50907	0.0143637	2.98099	up	NA	NA	16	NA	zinc finger CCCH domain-containing protein 62 [Oryza sativa Japonica Group] &gt;Q338N2.2 RecName: Full=Zinc finger CCCH domain-containing protein 62; Short=OsC3H62 [Oryza sativa Japonica Group] &gt;EEC66881.1 hypothetical protein OsI_33425 [Oryza sativa Indica Group] &gt;ABB47500.2 SAP domain containing protein, expressed [Oryza sativa Japonica Group] &gt;EEE50898.1 hypothetical protein OsJ_31392…
LOC_Os01g68860.1;LOC_Os01g68860.2;LOC_Os01g68860.3	C3H	-1.48681	2.26e-08	LOC4324354	LOC_Os01g68860	Os01g0917400	78.6547	47.1002	65.8198	27.2956	29.4131	24.9501	4.91e-07	0.3568	down	NA	NA	10	NA	NA
LOC_Os04g01480.1	C3H	1.26479	0.000219168	LOC9271204	LOC_Os04g01480	Os04g0105000	4.70887	8.50322	3.64976	11.6835	15.0557	21.4325	0.00109138	2.40292	up	NA	K15332	20	NA	zinc finger CCCH domain-containing protein 24 isoform X2 [Oryza sativa Japonica Group]
LOC_Os11g28270.1;LOC_Os11g28270.2;LOC_Os11g28270.3	C3H	-1.21546	9.29e-10	LOC4350492	LOC_Os11g28270	Os11g0472000	113.42	101.488	95.9334	55.1917	55.892	46.4735	3.14e-08	0.430637	down	NA	NA	8	NA	zinc finger CCCH domain-containing protein 63 isoform X2 [Oryza sativa Japonica Group]
LOC_Os12g21700.1	C3H	-1.05107	2.61e-09	LOC4352041	LOC_Os12g21700	Os12g0405100	84.7733	73.874	74.2046	43.2762	47.5326	42.9148	7.72e-08	0.482609	down	NA	NA	8	NA	zinc finger CCCH domain-containing protein 66 isoform X1 [Oryza sativa Japonica Group] &gt;XP_052138647.1 zinc finger CCCH domain-containing protein 66 [Oryza glaberrima] &gt;Q2QT65.1 RecName: Full=Zinc finger CCCH domain-containing protein 66; Short=OsC3H66 [Oryza sativa Japonica Group] &gt;ABA97542.1 Zinc finger CCCH type domain containing protein ZFN, putative, expressed [Oryza sativa Japonica…
LOC_Os02g08150.1	CO-like	-3.30697	9.2e-10	LOC4328490	LOC_Os02g08150	Os02g0178100	24.1723	8.08218	26.241	3.19585	2.79962	0.985669	3.12e-08	0.101042	down	NA	NA	17	NA	zinc finger protein CONSTANS-LIKE 3 [Oryza sativa Japonica Group]
LOC_Os07g47140.1	CO-like	-2.39331	4.27e-07	LOC4344220	LOC_Os07g47140	Os07g0667300	13.43	10.8687	11.6096	4.62697	1.69094	1.51383	5.81e-06	0.190345	down	NA	NA	8	NA	zinc finger protein CONSTANS-LIKE 13 isoform X1 [Oryza sativa Japonica Group] &gt;EAZ05064.1 hypothetical protein OsI_27253 [Oryza sativa Indica Group] &gt;KAB8106768.1 hypothetical protein EE612_041254 [Oryza sativa] &gt;KAF2924390.1 hypothetical protein DAI22_07g265600 [Oryza sativa Japonica Group] &gt;BAF22488.1 Os07g0667300 [Oryza sativa Japonica Group] &gt;BAG99873.1 unnamed protein product …
LOC_Os04g42020.1	CO-like	-1.84844	2.28e-09	LOC4336288	LOC_Os04g42020	Os04g0497700	79.5531	62.8369	88.527	32.2119	25.3922	17.7845	6.88e-08	0.277692	down	NA	NA	10	NA	zinc finger protein CONSTANS-LIKE 3 [Oryza sativa Japonica Group] &gt;XP_052151021.1 zinc finger protein CONSTANS-LIKE 3-like [Oryza glaberrima] &gt;KAB8095943.1 hypothetical protein EE612_024202 [Oryza sativa] &gt;KAF2934731.1 hypothetical protein DAI22_04g184400 [Oryza sativa Japonica Group] &gt;CAE03116.2 OSJNBa0067K08.19 [Oryza sativa Japonica Group] &gt;BAF15122.1 Os04g0497700 [Oryza sativa …
LOC_Os06g15330.1	CO-like	-1.7569	0.00012087	LOC4340698	LOC_Os06g15330	Os06g0264200	54.2189	25.8436	41.4932	21.6354	13.4363	7.03157	0.000659654	0.295883	down	NA	NA	19	NA	NA
LOC_Os09g33550.1	CO-like	1.68961	1.18e-07	LOC4347535	LOC_Os09g33550	Os09g0509700	5.23349	4.13038	2.76249	12.0956	20.3936	14.4706	1.96e-06	3.2257	up	NA	NA	4	NA	NA
LOC_Os06g44450.1	CO-like	-1.67111	3.96e-06	LOC9269795	LOC_Os06g44450	Os06g0654900	155.416	85.1635	175.093	51.64	69.3974	34.9807	3.77e-05	0.314012	down	NA	NA	8	NA	zinc finger protein CONSTANS-LIKE 5 [Oryza sativa Japonica Group] &gt;KAF2927885.1 hypothetical protein DAI22_06g237800 [Oryza sativa Japonica Group]
LOC_Os03g50310.1	CO-like	-1.38744	2.51e-05	LOC4333882	LOC_Os03g50310	Os03g0711100	69.7119	34.5383	59.0962	27.8251	26.4781	20.0786	0.000176408	0.382241	down	GO:0009536	NA	19	plastid	zinc finger protein CONSTANS-LIKE 16 [Oryza sativa Japonica Group] &gt;EAY91607.1 hypothetical protein OsI_13241 [Oryza sativa Indica Group] &gt;AAX95654.1 CCT motif, putative [Oryza sativa Japonica Group] &gt;ABF98509.1 CCT motif family protein, expressed [Oryza sativa Japonica Group] &gt;KAF2940946.1 hypothetical protein DAI22_03g311400 [Oryza sativa Japonica Group] &gt;BAF12967.1 Os03g0711100 …
LOC_Os06g19444.1;LOC_Os06g19444.2	CO-like	1.31747	2.99e-05	LOC4340812	LOC_Os06g19444	Os06g0298200	2.46022	4.486	2.46999	6.65489	9.51733	11.8077	0.000205265	2.49229	up	NA	NA	6	NA	zinc finger protein CONSTANS-LIKE 9 isoform X1 [Oryza sativa Japonica Group] &gt;KAB8102188.1 hypothetical protein EE612_033522 [Oryza sativa] &gt;KAF2926398.1 hypothetical protein DAI22_06g124900 [Oryza sativa Japonica Group] &gt;BAG93782.1 unnamed protein product [Oryza sativa Japonica Group] &gt;BAS97360.1 Os06g0298200 [Oryza sativa Japonica Group]
LOC_Os08g15050.1	CO-like	-1.20617	0.00479062	LOC4345073	LOC_Os08g15050	Os08g0249000	10.1638	7.86059	12.4529	3.32119	9.1106	3.52292	0.0143918	0.433417	down	NA	NA	19	NA	zinc finger protein CONSTANS-LIKE 3 [Oryza sativa Japonica Group]
LOC_Os12g41230.1;LOC_Os12g41230.2;LOC_Os12g41230.3	CPP	2.16671	6.72e-05	LOC4352740	LOC_Os12g41230	Os12g0605500	3.82524	20.7152	5.2627	33.1665	46.6345	77.1975	0.000404354	4.49	up	NA	K21776	20	NA	protein tesmin/TSO1-like CXC 2 [Oryza sativa Japonica Group] &gt;KAB8118127.1 hypothetical protein EE612_060809 [Oryza sativa] &gt;ABA99828.1 Tesmin/TSO1-like CXC domain containing protein, expressed [Oryza sativa Japonica Group] &gt;ABA99829.1 Tesmin/TSO1-like CXC domain containing protein, expressed [Oryza sativa Japonica Group] &gt;KAF2908717.1 hypothetical protein DAI22_12g203700 [Oryza sativ…
LOC_Os04g41560.2;LOC_Os04g41560.4	DBB	-2.35118	2.39e-11	LOC4336260	LOC_Os04g41560	Os04g0493000	247.764	141.027	321.776	58.1705	66.5002	41.3408	1.38e-09	0.195986	down	GO:0003677;GO:0005622;GO:0008270	NA	17	DNA binding; intracellular; zinc ion binding	NA
LOC_Os05g11510.1	DBB	-2.23426	4.26e-14	LOC4338069	LOC_Os05g11510	Os05g0204600	29.568	25.9739	28.2136	9.27219	6.09314	5.479	5.86e-12	0.21253	down	NA	NA	10	NA	NA
LOC_Os02g39360.1	DBB	-2.17366	3.2e-09	LOC4329923	LOC_Os02g39360	Os02g0606200	33.6129	18.3597	37.3152	8.48587	9.65123	5.43338	9.22e-08	0.221647	down	GO:0003677;GO:0005622;GO:0008270;GO:0031410	NA	8	DNA binding; intracellular; zinc ion binding; cytoplasmic vesicle	B-box zinc finger protein 25 [Oryza sativa Japonica Group] &gt;KAB8087858.1 hypothetical protein EE612_012293 [Oryza sativa] &gt;ADX60217.1 ORPHAN transcription factor, partial [Oryza sativa Japonica Group] &gt;KAF2945749.1 hypothetical protein DAI22_02g239700 [Oryza sativa Japonica Group] &gt;BAA33203.1 zinc finger protein [Oryza sativa Japonica Group] &gt;BAD19334.1 zinc finger protein [Oryza s…
LOC_Os03g55610.1	Dof	3.59734	0.00624634	LOC4334219	LOC_Os03g55610	Os03g0764900	0	0.232593	0	0.8806	1.03668	1.28954	0.0179502	12.1034	up	GO:0009536	NA	16	plastid	dof zinc finger protein 4-like [Oryza sativa Japonica Group] &gt;XP_052146879.1 dof zinc finger protein 4-like [Oryza glaberrima] &gt;KAB8093721.1 hypothetical protein EE612_020644 [Oryza sativa] &gt;ABF99035.1 Dof domain, zinc finger family protein, expressed [Oryza sativa Japonica Group] &gt;KAF2941482.1 hypothetical protein DAI22_03g350000 [Oryza sativa Japonica Group] &gt;BAF13286.1 Os03g0764…
LOC_Os03g07360.1	Dof	-2.74674	1.07e-16	LOC4331765	LOC_Os03g07360	Os03g0169600	59.3101	36.2675	60.4775	10.5809	10.6355	6.36561	3.42e-14	0.148987	down	GO:0003677	NA	17	DNA binding	cyclic dof factor 1 [Oryza sativa Japonica Group] &gt;KAB8090401.1 hypothetical protein EE612_015572 [Oryza sativa] &gt;AAL84292.1 putative zinc finger DNA-binding protein [Oryza sativa Japonica Group] &gt;AAO72548.1 putative H-protein promoter binding factor-2a [Oryza sativa Japonica Group] &gt;ABF94195.1 Dof domain, zinc finger family protein, expressed [Oryza sativa Japonica Group] &gt;EAZ2573…
LOC_Os07g48570.1	Dof	-1.7928	4.04e-08	LOC4344326	LOC_Os07g48570	Os07g0685000	45.9029	31.7242	43.3485	18.2026	12.9934	9.84257	7.95e-07	0.288611	down	NA	NA	8	NA	NA
LOC_Os10g26620.1	Dof	-1.6007	2.5e-08	LOC4348585	LOC_Os10g26620	Os10g0406300	9.24341	7.83736	10.9193	4.15311	3.85921	2.89155	5.34e-07	0.329716	down	GO:0031410	NA	8	cytoplasmic vesicle	cyclic dof factor 1 [Oryza sativa Japonica Group] &gt;ABB47574.1 Dof domain, zinc finger family protein, expressed [Oryza sativa Japonica Group] &gt;KAF2913514.1 hypothetical protein DAI22_10g091000 [Oryza sativa Japonica Group]
LOC_Os02g49440.1	Dof	-1.55174	1.38e-18	LOC4330589	LOC_Os02g49440	Os02g0726300	38.6353	36.3626	37.1632	15.1905	14.3199	15.889	6.96e-16	0.341097	down	NA	NA	19	NA	NA
LOC_Os09g29960.1	Dof	-1.51144	1.54e-13	LOC9268074	LOC_Os09g29960	Os09g0475800	27.621	25.7015	28.6573	11.8422	11.9288	10.3001	1.72e-11	0.350762	down	NA	NA	11	NA	dof zinc finger protein MNB1A [Oryza sativa Japonica Group] &gt;AGV39658.1 transcription factor Dof25 [Oryza sativa] &gt;KAB8110988.1 hypothetical protein EE612_048501 [Oryza sativa] &gt;BAD46375.1 putative DNA-binding protein [Oryza sativa Japonica Group] &gt;BAH94614.1 Os09g0475800 [Oryza sativa Japonica Group]
LOC_Os12g38200.1	Dof	1.49894	8.5e-06	LOC4352574	LOC_Os12g38200	Os12g0569900	0.852532	1.47989	0.884015	3.36096	3.05005	4.35779	7.13e-05	2.82635	up	NA	NA	20	NA	dof zinc finger protein DOF5.1 isoform X1 [Oryza sativa Japonica Group] &gt;ABA99651.2 Dof domain, zinc finger family protein, expressed [Oryza sativa Japonica Group] &gt;KAF2908412.1 hypothetical protein DAI22_12g182800 [Oryza sativa Japonica Group] &gt;BAF30095.2 Os12g0569900 [Oryza sativa Japonica Group] &gt;BAT17729.1 Os12g0569900 [Oryza sativa Japonica Group]
LOC_Os02g47810.1	Dof	1.06815	0.000199749	LOC4330470	LOC_Os02g47810	Os02g0707200	1.56668	2.7847	1.83004	4.60639	4.96789	5.75981	0.00101034	2.09674	up	GO:0003677	NA	20	DNA binding	dof zinc finger protein DOF3.1 [Oryza sativa Japonica Group] &gt;KAF2946687.1 hypothetical protein DAI22_02g303800 [Oryza sativa Japonica Group] &gt;KAF2946688.1 hypothetical protein DAI22_02g303800 [Oryza sativa Japonica Group]
LOC_Os05g02150.1	Dof	1.04426	0.00156294	LOC4337599	LOC_Os05g02150	Os05g0112200	2.30566	4.78365	2.34976	7.17285	6.90309	8.5661	0.00562097	2.0623	up	NA	NA	2	NA	dof zinc finger protein DOF3.6 isoform X1 [Oryza sativa Japonica Group] &gt;KAF2928796.1 hypothetical protein DAI22_05g010000 [Oryza sativa Japonica Group]
LOC_Os06g13670.1	E2F/DP	2.02031	2.71e-05	LOC4340638	LOC_Os06g13670	Os06g0245900	0.736878	3.55018	1.89625	8.58106	8.7367	12.1199	0.000189081	4.0567	up	NA	K09391	20	NA	NA
LOC_Os07g48630.1;LOC_Os07g48630.2	EIL	1.06393	1.82e-09	LOC4344331	LOC_Os07g48630	Os07g0685700	50.1228	46.4631	46.0969	94.6873	128.258	134.411	5.61e-08	2.09062	up	NA	K14514	5	NA	ETHYLENE INSENSITIVE 3-like 1 protein [Oryza sativa Japonica Group] &gt;Q8W3L9.2 RecName: Full=Protein ETHYLENE-INSENSITIVE 3-like 2; Short=EIN3-like protein 2; Short=OsEIL2 [Oryza sativa Japonica Group] &gt;ADX60245.1 EIL transcription factor, partial [Oryza sativa Japonica Group] &gt;EEE67841.1 hypothetical protein OsJ_25629 [Oryza sativa Japonica Group] &gt;KAF2924581.1 hypothetical protein DA…
LOC_Os02g54050.1	ERF	7.08735	5.3e-05	LOC107278604	LOC_Os02g54050	Os02g0781300	0	0	0	0.641108	0.202497	0.152096	0.000332538	135.989	up	NA	K09286	1	NA	ethylene-responsive transcription factor ERF018 [Oryza sativa Japonica Group] &gt;KAB8089185.1 hypothetical protein EE612_014055 [Oryza sativa] &gt;KAF2947262.1 hypothetical protein DAI22_02g356900 [Oryza sativa Japonica Group] &gt;BAS81220.1 Os02g0781300 [Oryza sativa Japonica Group]
LOC_Os07g47790.1;LOC_Os07g47790.2	ERF	5.69581	0.0102593	LOC4344266	LOC_Os07g47790	Os07g0674800	0	0	0	0.132144	0.071638	0.436739	0.0270918	51.8334	up	NA	K09286	5	NA	ethylene-responsive transcription factor RAP2-3 [Oryza sativa Japonica Group] &gt;EAZ05119.1 hypothetical protein OsI_27312 [Oryza sativa Indica Group] &gt;KAF2924485.1 hypothetical protein DAI22_07g271800 [Oryza sativa Japonica Group] &gt;BAC83539.1 AP2 domain transcription factor EREBP [Oryza sativa Japonica Group] &gt;BAD31975.1 AP2 domain transcription factor EREBP [Oryza sativa Japonica Grou…
LOC_Os11g06770.1;LOC_Os11g06770.2	ERF	5.5293	0.0142778	LOC4349881	LOC_Os11g06770	Os11g0168500	0	0	0	0.052768	0.294105	0.13724	0.0357864	46.1833	up	NA	K09286	1	NA	ethylene-responsive transcription factor ERF110 [Oryza sativa Japonica Group] &gt;AAX93016.1 AP2 domain, putative [Oryza sativa Japonica Group] &gt;AAX96475.1 unknown protein; contains similarity to AP2 domain transcription factor gene_id:MPF21.9 [Oryza sativa Japonica Group] &gt;ABA91589.1 AP2 domain containing protein, expressed [Oryza sativa Japonica Group] &gt;KAF2909699.1 hypothetical protei…
LOC_Os09g35030.1	ERF	4.45574	5.88e-05	LOC4347620	LOC_Os09g35030	Os09g0522200	1.87257	0.54788	0.076707	21.8345	31.033	13.9246	0.000361841	21.9437	up	NA	K09286	5	NA	NA
LOC_Os09g35020.1	ERF	4.0274	4.56e-08	LOC4347619	LOC_Os09g35020	Os09g0522100	0.245318	0.073535	0.068327	3.35547	2.61807	1.37312	8.79e-07	16.3068	up	GO:0009536	K09286	5	plastid	dehydration-responsive element-binding protein 1H [Oryza sativa Japonica Group] &gt;KAF2917129.1 hypothetical protein DAI22_09g169500 [Oryza sativa Japonica Group] &gt;BAD46703.1 putative CBF3-like protein [Oryza sativa Japonica Group]
LOC_Os09g35010.1	ERF	3.89043	2.31e-07	LOC4347618	LOC_Os09g35010	Os09g0522000	1.13406	0.234337	0.216529	15.1206	9.15812	3.31848	3.46e-06	14.8298	up	NA	K09286	5	NA	dehydration-responsive element-binding protein 1B, partial [Oryza sativa Japonica Group]
LOC_Os02g55380.1	ERF	3.62615	0.0161503	LOC4331013	LOC_Os02g55380	Os02g0797100	0	0	0.076023	0.349126	0.662938	0.407161	0.0396708	12.3475	up	NA	K09286	4	NA	ethylene-responsive transcription factor ERF003 [Oryza sativa Japonica Group] &gt;XP_052144502.1 ethylene-responsive transcription factor ERF003 [Oryza glaberrima] &gt;EAY87866.1 hypothetical protein OsI_09287 [Oryza sativa Indica Group] &gt;KAB8089326.1 hypothetical protein EE612_014237 [Oryza sativa] &gt;EAZ24945.1 hypothetical protein OsJ_08726 [Oryza sativa Japonica Group] &gt;KAF2947415.1 hy…
LOC_Os01g21120.1	ERF	3.54132	5.38e-33	LOC4327287	LOC_Os01g21120	Os01g0313300	4.10435	2.88543	3.70072	34.0915	49.1941	67.6159	7.18e-29	11.6425	up	NA	K09286	9	NA	ethylene-responsive transcription factor ERF071 [Oryza sativa Japonica Group] &gt;KAB8081166.1 hypothetical protein EE612_002120 [Oryza sativa] &gt;KAF2949845.1 hypothetical protein DAI22_01g146800 [Oryza sativa Japonica Group] &gt;BAB92777.1 putative ethylene response factor 2 [Oryza sativa Japonica Group] &gt;BAF04782.1 Os01g0313300 [Oryza sativa Japonica Group] &gt;BAG99412.1 unnamed protein p…
LOC_Os06g44750.1	ERF	3.41786	0.0115252	LOC4341722	LOC_Os06g44750	Os06g0657500	0	0.101902	0	0.36073	0.41227	0.513989	0.0298697	10.6876	up	NA	K09285	9	NA	AP2-like ethylene-responsive transcription factor AIL5 [Oryza sativa Japonica Group] &gt;KAF2927896.1 hypothetical protein DAI22_06g238900 [Oryza sativa Japonica Group] &gt;BAD37823.1 aintegumenta-like protein [Oryza sativa Japonica Group] &gt;BAF20170.1 Os06g0657500 [Oryza sativa Japonica Group] &gt;BAS98952.1 Os06g0657500 [Oryza sativa Japonica Group]
LOC_Os02g45450.1	ERF	3.2548	1.88e-06	LOC4330306	LOC_Os02g45450	Os02g0677300	0.51304	0.122673	0.225691	4.95732	3.35912	1.48462	2.01e-05	9.54535	up	NA	K09286	5	NA	dehydration-responsive element-binding protein 1G [Oryza sativa Japonica Group] &gt;Q6EP77.1 RecName: Full=Dehydration-responsive element-binding protein 1G; Short=Protein DREB1G [Oryza sativa Japonica Group] &gt;KAB8088403.1 hypothetical protein EE612_012995 [Oryza sativa] &gt;EAZ24170.1 hypothetical protein OsJ_07915 [Oryza sativa Japonica Group] &gt;KAF2946341.1 hypothetical protein DAI22_02g2…
LOC_Os06g08340.1	ERF	3.10267	0.00127731	LOC4340313	LOC_Os06g08340	Os06g0181700	0.341336	0.197441	0	1.39793	2.37248	1.98844	0.00472957	8.5901	up	GO:0005739;GO:0009536	K09286	20	mitochondrion; plastid	ethylene-responsive transcription factor ERF003 [Oryza sativa Japonica Group] &gt;XP_052160201.1 ethylene-responsive transcription factor ERF003-like [Oryza glaberrima] &gt;BAD72573.1 putative ethylene response factor 1 [Oryza sativa Japonica Group]
LOC_Os03g15660.1	ERF	3.06573	0.00448575	LOC4332331	LOC_Os03g15660	Os03g0263000	0.067386	0.362374	0	1.37569	1.7517	0.980096	0.0136047	8.37293	up	NA	K09286	7	NA	ethylene-responsive transcription factor ERF013 [Oryza sativa Japonica Group] &gt;KAB8091185.1 hypothetical protein EE612_016632 [Oryza sativa] &gt;AAP06854.1 hypothetical protein [Oryza sativa Japonica Group] &gt;ABF95106.1 AP2 domain containing protein, expressed [Oryza sativa Japonica Group] &gt;EAZ26346.1 hypothetical protein OsJ_10227 [Oryza sativa Japonica Group] &gt;KAF2938448.1 hypothetic…
LOC_Os06g03670.1	ERF	2.93098	0.00549644	LOC4339974	LOC_Os06g03670	Os06g0127100	0.541642	0.72876	0	6.0793	3.59049	1.33308	0.0161183	7.62626	up	NA	K09286	5	NA	dehydration-responsive element-binding protein 1C [Oryza sativa Japonica Group] &gt;A2Y8S6.1 RecName: Full=Dehydration-responsive element-binding protein 1C; Short=Protein DREB1C; AltName: Full=Protein C-repeat-binding factor 1 [Oryza sativa Indica Group] &gt;Q9LWV3.1 RecName: Full=Dehydration-responsive element-binding protein 1C; Short=Protein DREB1C; AltName: Full=Protein C-repeat-binding fact…
LOC_Os07g22730.1	ERF	2.92412	0.0101146	LOC9266984	LOC_Os07g22730	Os07g0410300	0.088849	0	0.073993	0.577165	0.448455	0.819514	0.0267812	7.59009	up	NA	K09286	4	NA	ethylene-responsive transcription factor 15 [Oryza sativa Japonica Group] &gt;XP_052163223.1 ethylene-responsive transcription factor 15-like [Oryza glaberrima] &gt;EAZ03592.1 hypothetical protein OsI_25728 [Oryza sativa Indica Group] &gt;KAF2922423.1 hypothetical protein DAI22_07g112350 [Oryza sativa Japonica Group]
LOC_Os01g12440.1	ERF	2.83882	3.01e-05	LOC4326729	LOC_Os01g12440	Os01g0224100	0.502123	3.28667	0.346497	10.0122	8.98309	15.3087	0.000206347	7.15437	up	NA	K09286	20	NA	ethylene-responsive transcription factor CRF2 [Oryza sativa Japonica Group] &gt;BAD81316.1 Pti6 -like [Oryza sativa Japonica Group] &gt;BAD81461.1 Pti6 -like [Oryza sativa Japonica Group] &gt;BAF04364.1 Os01g0224100 [Oryza sativa Japonica Group] &gt;BAG94891.1 unnamed protein product [Oryza sativa Japonica Group] &gt;BAG97749.1 unnamed protein product [Oryza sativa Japonica Group]
LOC_Os02g45420.1	ERF	2.81687	9.38e-05	LOC9270349	LOC_Os02g45420	Os02g0676800	0.0624	0.243782	0.2362	2.52253	1.32905	0.535468	0.00053533	7.0463	up	NA	K09286	5	NA	ethylene-responsive transcription factor ERF027 [Oryza sativa Japonica Group] &gt;KAB8088402.1 hypothetical protein EE612_012989 [Oryza sativa] &gt;BAD29233.1 putative DRE binding factor 2 [Oryza sativa Japonica Group] &gt;BAD29539.1 putative DRE binding factor 2 [Oryza sativa Japonica Group] &gt;BAH01466.1 unnamed protein product [Oryza sativa Japonica Group] &gt;BAH91841.1 Os02g0676800 [Oryza s…
LOC_Os05g29810.1	ERF	2.62509	7.18e-05	LOC4338539	LOC_Os05g29810	Os05g0361700	1.03118	2.50346	0.855561	2.59617	8.83075	21.42	0.000427314	6.16924	up	NA	K09286	2	NA	ethylene-responsive transcription factor ERF071 [Oryza sativa Japonica Group] &gt;AAT38098.1 unknown protein [Oryza sativa Japonica Group] &gt;AAV31394.1 unknown protein [Oryza sativa Japonica Group] &gt;BAF17225.1 Os05g0361700 [Oryza sativa Japonica Group] &gt;BAG94483.1 unnamed protein product [Oryza sativa Japonica Group] &gt;BAS93611.1 Os05g0361700 [Oryza sativa Japonica Group]
LOC_Os04g48350.1	ERF	2.54712	1.35e-05	LOC4336721	LOC_Os04g48350	Os04g0572400	1.16805	0.477018	0.273	5.69613	4.87648	2.70428	0.00010514	5.84468	up	NA	K09286	5	NA	dehydration-responsive element-binding protein 1E [Oryza sativa Japonica Group] &gt;XP_052153133.1 dehydration-responsive element-binding protein 1E [Oryza glaberrima] &gt;A2XWL6.1 RecName: Full=Dehydration-responsive element-binding protein 1E; Short=Protein DREB1E [Oryza sativa Indica Group] &gt;Q8H273.1 RecName: Full=Dehydration-responsive element-binding protein 1E; Short=Protein DREB1E [Oryz…
LOC_Os01g54890.1	ERF	-2.40127	0.00146712	LOC4327006	LOC_Os01g54890	Os01g0752500	1.89625	1.3892	2.85815	0.110847	1.00246	0.298156	0.00533319	0.189298	down	NA	K09286	11	NA	pathogenesis-related genes transcriptional activator PTI5 [Oryza sativa Japonica Group] &gt;KAB8083540.1 hypothetical protein EE612_005771 [Oryza sativa] &gt;KAF2952303.1 hypothetical protein DAI22_01g327400 [Oryza sativa Japonica Group] &gt;BAD87106.1 putative ethylene responsive protein [Oryza sativa Japonica Group] &gt;BAD87181.1 putative ethylene responsive protein [Oryza sativa Japonica Grou…
LOC_Os02g43790.1	ERF	2.17124	0.000457119	LOC4330189	LOC_Os02g43790	Os02g0654700	6.08771	0.88774	1.64264	17.5381	17.5447	11.9191	0.00200129	4.50411	up	GO:0003700;GO:0005634;GO:0006355	K09286	5	DNA-binding transcription factor activity; nucleus; regulation of transcription, DNA-templated	NA
LOC_Os03g08460.1	ERF	1.7514	0.00539596	LOC4331843	LOC_Os03g08460	Os03g0182800	1.02883	0.374557	0.755386	1.55807	1.75746	5.66124	0.0158697	3.36684	up	NA	K09286	9	NA	ethylene-responsive transcription factor RAP2-12 [Oryza sativa Japonica Group] &gt;KAB8090511.1 hypothetical protein EE612_015699 [Oryza sativa] &gt;AAP92744.1 ap2 domain containing protein [Oryza sativa Japonica Group] &gt;ABF94328.1 AP2 domain containing protein, expressed [Oryza sativa Japonica Group] &gt;KAF2937634.1 hypothetical protein DAI22_03g064200 [Oryza sativa Japonica Group] &gt;BAF11…
LOC_Os02g29550.1;LOC_Os02g29550.2;LOC_Os02g29550.3	ERF	-1.56976	7.08e-12	LOC9271519	LOC_Os02g29550	Os02g0499000	59.6452	53.197	58.6813	24.7111	31.3701	20.9598	4.99e-10	0.336865	down	GO:0005739	NA	10	mitochondrion	ethylene-responsive transcription factor-like protein At4g13040 [Oryza sativa Japonica Group] &gt;XP_015626906.1 ethylene-responsive transcription factor-like protein At4g13040 [Oryza sativa Japonica Group] &gt;XP_052142547.1 ethylene-responsive transcription factor-like protein At4g13040 [Oryza glaberrima] &gt;XP_052142548.1 ethylene-responsive transcription factor-like protein At4g13040 [Oryza …
LOC_Os01g64790.1	ERF	1.5196	0.000385952	LOC4325050	LOC_Os01g64790	Os01g0868000	0.804154	0.414105	0.807617	1.85703	2.81038	2.3375	0.00174145	2.86711	up	NA	K09286	1	NA	ethylene-responsive transcription factor ABR1 [Oryza sativa Japonica Group] &gt;KAF2953508.1 hypothetical protein DAI22_01g412900 [Oryza sativa Japonica Group]
LOC_Os07g42510.1	ERF	1.51492	9.43e-12	LOC4343912	LOC_Os07g42510	Os07g0617000	8.49502	8.59212	6.12919	23.4364	30.0165	25.5082	6.35e-10	2.85783	up	NA	K09286	7	NA	ethylene-responsive transcription factor 1-like [Oryza sativa Japonica Group] &gt;EAZ40665.1 hypothetical protein OsJ_25135 [Oryza sativa Japonica Group] &gt;KAF2923929.1 hypothetical protein DAI22_07g230300 [Oryza sativa Japonica Group] &gt;BAC79864.1 EREB-like protein [Oryza sativa Japonica Group] &gt;BAC79993.1 EREB-like protein [Oryza sativa Japonica Group] &gt;BAF22194.1 Os07g0617000 [Oryza …
LOC_Os09g13940.1;LOC_Os09g13940.2;LOC_Os09g13940.3;LOC_Os09g13940.4	ERF	-1.46054	9.04e-10	LOC4346686	LOC_Os09g13940	Os09g0309700	10.2203	8.76086	12.2158	3.8263	5.27446	4.463	3.08e-08	0.363358	down	NA	NA	8	NA	ethylene-responsive transcription factor ERF117 [Oryza sativa Japonica Group] &gt;XP_015651274.1 ethylene-responsive transcription factor ERF117 [Oryza sativa Japonica Group] &gt;XP_015651275.1 ethylene-responsive transcription factor ERF117 [Oryza sativa Japonica Group] &gt;XP_015651276.1 ethylene-responsive transcription factor ERF117 [Oryza sativa Japonica Group] &gt;BAF24749.1 Os09g0309700 [O…
LOC_Os03g60120.1	ERF	-1.43772	5.67e-11	LOC4334558	LOC_Os03g60120	Os03g0815800	137.73	128.83	163.569	69.4552	62.1149	56.1175	2.92e-09	0.369149	down	NA	K09286	17	NA	ethylene-responsive transcription factor CRF5 [Oryza sativa Japonica Group] &gt;KAB8094167.1 hypothetical protein EE612_021266 [Oryza sativa] &gt;AAO60030.1 putative AP2 domain containing protein [Oryza sativa Japonica Group] &gt;AAR01751.1 putative AP2 domain transcription factor [Oryza sativa Japonica Group] &gt;ABF99541.1 AP2 domain containing protein, expressed [Oryza sativa Japonica Group] &…
LOC_Os06g07030.1	ERF	1.41257	6.34e-07	LOC4340244	LOC_Os06g07030	Os06g0166400	8.07086	6.57064	6.81847	14.6591	26.9192	27.4997	8.05e-06	2.66211	up	NA	K09286	4	NA	ethylene-responsive transcription factor RAP2-9 [Oryza sativa Japonica Group] &gt;KAF2925381.1 hypothetical protein DAI22_06g047700 [Oryza sativa Japonica Group] &gt;BAD67600.1 putative AP2 domain containing protein RAP2.1 [Oryza sativa Japonica Group] &gt;BAD67863.1 putative AP2 domain containing protein RAP2.1 [Oryza sativa Japonica Group] &gt;BAF18828.1 Os06g0166400 [Oryza sativa Japonica Grou…
LOC_Os05g41760.1	ERF	-1.22912	5.57e-06	LOC4339208	LOC_Os05g41760	Os05g0497200	13.6898	20.4503	19.1318	9.69978	7.07296	9.95108	5.01e-05	0.426576	down	NA	K09286	19	NA	ethylene-responsive transcription factor 12 [Oryza sativa Japonica Group] &gt;EAY98555.1 hypothetical protein OsI_20468 [Oryza sativa Indica Group] &gt;KAB8100037.1 hypothetical protein EE612_030390 [Oryza sativa] &gt;AAT07582.1 unknown protein [Oryza sativa Japonica Group] &gt;EEE64227.1 hypothetical protein OsJ_19060 [Oryza sativa Japonica Group] &gt;KAF2931455.1 hypothetical protein DAI22_05g1…
LOC_Os04g46220.1	ERF	1.21601	0.00567816	LOC4336571	LOC_Os04g46220	Os04g0546800	12.9916	5.15579	5.29013	13.9972	20.0856	32.5561	0.0165565	2.32304	up	NA	K09286	5	NA	ethylene-responsive transcription factor 2 [Oryza sativa Japonica Group] &gt;KAB8096335.1 hypothetical protein EE612_024741 [Oryza sativa] &gt;ABK34954.1 development related ERF protein [Oryza sativa Japonica Group] &gt;KAF2935190.1 hypothetical protein DAI22_04g214700 [Oryza sativa Japonica Group] &gt;CAD41472.3 OSJNBa0079A21.16 [Oryza sativa Japonica Group] &gt;BAF15388.1 Os04g0546800 [Oryza sa…
LOC_Os03g08470.1;LOC_Os03g08470.2;LOC_Os03g08470.3	ERF	1.14083	0.0058715	LOC4331845	LOC_Os03g08470	Os03g0183000	20.4127	15.6981	6.77334	23.7339	40.1933	50.533	0.0170448	2.20507	up	GO:0009536	K09286	20	plastid	ethylene-responsive transcription factor ERF073 [Oryza sativa Japonica Group] &gt;KAB8090512.1 hypothetical protein EE612_015700 [Oryza sativa] &gt;AAK92635.1 Putative AP2 domain containing protein [Oryza sativa Japonica Group] &gt;ABF94329.1 AP2 domain containing protein, expressed [Oryza sativa Japonica Group] &gt;ABF94330.1 AP2 domain containing protein, expressed [Oryza sativa Japonica Group]…
LOC_Os02g51670.1	ERF	-1.11178	0.000159924	LOC4330752	LOC_Os02g51670	Os02g0752800	144.142	80.1195	118.963	65.036	72.4722	52.1599	0.000835686	0.462723	down	NA	K09286	19	NA	ethylene-responsive transcription factor RAP2-4 [Oryza sativa Japonica Group] &gt;KAB8088950.1 hypothetical protein EE612_013735 [Oryza sativa] &gt;KAF2947003.1 hypothetical protein DAI22_02g336800 [Oryza sativa Japonica Group] &gt;BAD15561.1 putative dehydration-responsive element binding protein 3 [Oryza sativa Japonica Group] &gt;BAF10056.1 Os02g0752800 [Oryza sativa Japonica Group] &gt;BAG974…
LOC_Os07g12510.1	ERF	-1.05677	9.68e-07	LOC4342759	LOC_Os07g12510	Os07g0227600	30.0769	25.6322	25.3534	16.707	14.3698	15.0676	1.15e-05	0.480707	down	NA	K09286	8	NA	NA
LOC_Os03g15040.1;LOC_Os03g15040.2	FAR1	-1.30156	0.00130313	LOC4332292	LOC_Os03g15040	Os03g0255400	28.4588	9.7235	18.1898	8.96005	11.3534	7.22274	0.00480982	0.405687	down	NA	K17604	19	NA	uncharacterized protein LOC4332292 [Oryza sativa Japonica Group] &gt;ABF95032.1 FAR1 family protein, expressed [Oryza sativa Japonica Group] &gt;EEE58717.1 hypothetical protein OsJ_10174 [Oryza sativa Japonica Group] &gt;KAF2938397.1 hypothetical protein DAI22_03g115600 [Oryza sativa Japonica Group] &gt;BAF11508.1 Os03g0255400 [Oryza sativa Japonica Group] &gt;BAG90063.1 unnamed protein product […
LOC_Os10g39550.1	G2-like	4.07576	0.00178733	LOC112936623	LOC_Os10g39550	Os10g0541500	0	0.095694	0	0.353145	0.604071	0.916288	0.00628393	16.8627	up	NA	NA	20	NA	uncharacterized protein LOC112936623 isoform X1 [Oryza sativa Japonica Group] &gt;KAF2914619.1 hypothetical protein DAI22_10g177100 [Oryza sativa Japonica Group]
LOC_Os05g40960.1	G2-like	-2.48555	1.39e-10	LOC4339151	LOC_Os05g40960	Os05g0488600	24.6575	18.4472	20.0508	5.76296	5.3026	2.32217	6.22e-09	0.178556	down	NA	NA	8	NA	myb-related protein 2 isoform X1 [Oryza sativa Japonica Group] &gt;XP_015640414.1 myb-related protein 2 isoform X1 [Oryza sativa Japonica Group] &gt;XP_015640415.1 myb-related protein 2 isoform X1 [Oryza sativa Japonica Group] &gt;KAB8099957.1 hypothetical protein EE612_030294 [Oryza sativa] &gt;EEE64175.1 hypothetical protein OsJ_19007 [Oryza sativa Japonica Group] &gt;KAF2931371.1 hypothetical …
LOC_Os06g24070.1	G2-like	-1.88175	1.03e-11	LOC4340977	LOC_Os06g24070	Os06g0348800	108.201	84.4582	134.681	41.2488	29.7394	34.0232	6.84e-10	0.271354	down	NA	NA	17	NA	NA
LOC_Os02g22020.1	G2-like	-1.71293	1.63e-16	LOC4329184	LOC_Os02g22020	Os02g0325600	17.6517	24.2527	25.8179	7.43768	8.19159	8.85121	4.92e-14	0.305039	down	NA	NA	17	NA	transcription factor NIGT1 [Oryza sativa Japonica Group] &gt;XP_052141907.1 transcription factor NIGT1 [Oryza glaberrima] &gt;Q6Z869.1 RecName: Full=Transcription factor NIGT1; AltName: Full=MYB-domain transcription factor NIGT1; AltName: Full=Protein NITRATE-INDUCIBLE GARP-TYPE TRANSCRIPTIONAL REPRESSOR 1 [Oryza sativa Japonica Group] &gt;KAB8087068.1 hypothetical protein EE612_010868 [Oryza sat…
LOC_Os03g20900.1	G2-like	-1.44995	3.88e-08	LOC4332704	LOC_Os03g20900	Os03g0325500	23.809	16.5638	25.4763	8.23391	11.5129	9.18211	7.71e-07	0.366035	down	GO:0005739	NA	8	mitochondrion	myb-related protein 2 isoform X1 [Oryza sativa Japonica Group] &gt;KAB8091611.1 hypothetical protein EE612_017141 [Oryza sativa] &gt;ABF95708.1 transfactor, putative, expressed [Oryza sativa Japonica Group] &gt;EAZ26768.1 hypothetical protein OsJ_10679 [Oryza sativa Japonica Group] &gt;KAF2939034.1 hypothetical protein DAI22_03g162900 [Oryza sativa Japonica Group] &gt;BAF11898.1 Os03g0325500 [Ory…
LOC_Os06g49040.1	G2-like	-1.36221	1.6e-09	LOC4341990	LOC_Os06g49040	Os06g0703900	95.7047	72.9109	82.9167	42.5128	35.3551	38.1868	5.04e-08	0.388986	down	NA	NA	17	NA	protein PHOSPHATE STARVATION RESPONSE 3-like [Oryza sativa Japonica Group] &gt;KAB8103762.1 hypothetical protein EE612_036357 [Oryza sativa] &gt;EEE66318.1 hypothetical protein OsJ_22555 [Oryza sativa Japonica Group] &gt;KAF2928359.1 hypothetical protein DAI22_06g273100 [Oryza sativa Japonica Group] &gt;BAD54045.1 putative transfactor [Oryza sativa Japonica Group] &gt;BAF20417.1 Os06g0703900 [Ory…
LOC_Os07g48596.1	G2-like	-1.28546	1.44e-07	LOC4344327	LOC_Os07g48596	Os07g0685300	11.227	8.92959	11.2881	5.53339	4.88013	4.84633	2.33e-06	0.410241	down	NA	NA	17	NA	myb-related protein 1 isoform X1 [Oryza sativa Japonica Group] &gt;XP_052160854.1 myb-related protein 1-like isoform X1 [Oryza glaberrima] &gt;KAF2924572.1 hypothetical protein DAI22_07g277500 [Oryza sativa Japonica Group]
LOC_Os04g47890.1	G2-like	1.17447	0.00434749	LOC4336691	LOC_Os04g47890	Os04g0566600	0.780373	1.93192	1.45298	3.89587	2.68953	4.44014	0.0132486	2.2571	up	NA	NA	2	NA	putative Myb family transcription factor At1g14600 [Oryza sativa Japonica Group] &gt;XP_052151329.1 myb family transcription factor MOF1 [Oryza glaberrima] &gt;A3AWH5.1 RecName: Full=Myb family transcription factor MOF1; AltName: Full=Protein MORE FLORET 1 [Oryza sativa Japonica Group] &gt;KAB8096507.1 hypothetical protein EE612_024976 [Oryza sativa] &gt;EAZ31664.1 hypothetical protein OsJ_15811 …
LOC_Os01g74020.1	G2-like	1.14084	0.011509	LOC4326391	LOC_Os01g74020	Os01g0971800	6.66009	4.74793	2.42745	15.8669	12.0685	7.93408	0.0298334	2.2051	up	NA	NA	4	NA	NA
LOC_Os03g21240.1	G2-like	-1.08476	4.37e-08	LOC4332726	LOC_Os03g21240	Os03g0329900	29.401	23.0769	26.2631	14.0129	15.4747	14.7884	8.49e-07	0.471472	down	GO:0009536	NA	11	plastid	protein PHOSPHATE STARVATION RESPONSE 1 [Oryza sativa Japonica Group] &gt;Q10LZ1.1 RecName: Full=Protein PHOSPHATE STARVATION RESPONSE 1; Short=OsPHR1 [Oryza sativa Japonica Group] &gt;KAB8091644.1 hypothetical protein EE612_017190 [Oryza sativa] &gt;ABF95748.1 myb-like DNA-binding domain, SHAQKYF class family protein, expressed [Oryza sativa Japonica Group] &gt;EEE58994.1 hypothetical protein Os…
LOC_Os04g56990.1;LOC_Os04g56990.2;LOC_Os04g56990.3	G2-like	-1.05751	0.000139131	LOC4337318	LOC_Os04g56990	Os04g0665600	5.05919	5.76352	4.5192	2.72416	3.65725	2.2687	0.000742301	0.48046	down	NA	NA	19	NA	uncharacterized protein LOC4337318 isoform X1 [Oryza sativa Japonica Group] &gt;XP_015636270.1 uncharacterized protein LOC4337318 isoform X1 [Oryza sativa Japonica Group] &gt;XP_015636271.1 uncharacterized protein LOC4337318 isoform X1 [Oryza sativa Japonica Group] &gt;XP_015636272.1 uncharacterized protein LOC4337318 isoform X1 [Oryza sativa Japonica Group] &gt;XP_025880593.1 uncharacterized pro…
LOC_Os06g35140.1	G2-like	-1.05379	0.0103711	LOC4341235	LOC_Os06g35140	Os06g0543200	2.01551	1.51777	2.49309	0.957945	1.6727	0.819356	0.0273301	0.481701	down	NA	NA	12	NA	uncharacterized protein LOC4341235 isoform X1 [Oryza sativa Japonica Group] &gt;KAB8102772.1 hypothetical protein EE612_034739 [Oryza sativa] &gt;EAZ37279.1 hypothetical protein OsJ_21617 [Oryza sativa Japonica Group] &gt;KAF2927117.1 hypothetical protein DAI22_06g180200 [Oryza sativa Japonica Group] &gt;BAD54297.1 MYB transcription factor-like [Oryza sativa Japonica Group] &gt;BAF19724.1 Os06g05…
LOC_Os05g50270.1	GATA	6.46468	0.000385561	LOC4339709	LOC_Os05g50270	Os05g0578900	0	0	0	0.164047	0.473942	0.296947	0.00174041	88.3206	up	NA	NA	2	NA	NA
LOC_Os05g49280.1	GATA	4.01104	0.00229872	LOC107276441	LOC_Os05g49280	Os05g0567900	0	0.121631	0	0.421108	0.971081	0.886647	0.00775282	16.1229	up	NA	NA	2	NA	NA
LOC_Os01g47360.1	GATA	2.78773	0.0139517	LOC9272543	LOC_Os01g47360	Os01g0662800	0	0.503304	0.046662	0.841176	1.70143	1.9145	0.0350944	6.9054	up	NA	NA	20	NA	GATA transcription factor 20 [Oryza sativa Japonica Group] &gt;KAF2951533.1 hypothetical protein DAI22_01g269700 [Oryza sativa Japonica Group] &gt;BAB91742.1 GATA-type zinc finger transcription factor-like [Oryza sativa Japonica Group] &gt;BAH91223.1 Os01g0662800 [Oryza sativa Japonica Group] &gt;BAS73549.1 Os01g0662800 [Oryza sativa Japonica Group]
LOC_Os01g54210.1	GATA	1.86776	5.09e-07	LOC4326175	LOC_Os01g54210	Os01g0745700	2.77859	8.77843	5.06485	23.3204	21.2613	26.3434	6.72e-06	3.64964	up	NA	NA	20	NA	GATA transcription factor 12 [Oryza sativa Japonica Group] &gt;KAB8083481.1 hypothetical protein EE612_005685 [Oryza sativa] &gt;KAF2952243.1 hypothetical protein DAI22_01g322400 [Oryza sativa Japonica Group] &gt;BAC05593.1 putative AG-motif binding protein-4 [Oryza sativa Japonica Group] &gt;BAF06141.1 Os01g0745700 [Oryza sativa Japonica Group] &gt;BAS74314.1 Os01g0745700 [Oryza sativa Japonica …
LOC_Os01g74540.1	GATA	1.68535	2.56e-05	LOC4327810	LOC_Os01g74540	Os01g0976800	2.16359	4.44695	2.3515	7.76595	9.37408	17.2212	0.000179455	3.21618	up	NA	NA	16	NA	GATA transcription factor 16 [Oryza sativa Japonica Group] &gt;EEE56108.1 hypothetical protein OsJ_04967 [Oryza sativa Japonica Group] &gt;KAF2954581.1 hypothetical protein DAI22_01g493700 [Oryza sativa Japonica Group] &gt;BAD87039.1 zinc finger protein-like [Oryza sativa Japonica Group] &gt;BAF07484.2 Os01g0976800 [Oryza sativa Japonica Group] &gt;BAH01077.1 unnamed protein product [Oryza sativa…
LOC_Os10g40810.1	GATA	1.67516	0.000942341	LOC4349356	LOC_Os10g40810	Os10g0557600	4.42912	29.1938	15.2121	62.549	51.0028	66.9144	0.00367015	3.19356	up	NA	NA	20	NA	GATA transcription factor 2 [Oryza sativa Japonica Group] &gt;AAK55449.1 putative transcription factor [Oryza sativa Japonica Group] &gt;AAP54978.1 GATA zinc finger family protein, expressed [Oryza sativa Japonica Group] &gt;EAY79485.1 hypothetical protein OsI_34613 [Oryza sativa Indica Group] &gt;KAF2914772.1 hypothetical protein DAI22_10g188100 [Oryza sativa Japonica Group]
LOC_Os03g52450.1;LOC_Os03g52450.2	GATA	-1.53395	6.17e-06	LOC4334019	LOC_Os03g52450	Os03g0734900	20.8597	14.5361	20.4976	9.69654	7.94111	5.32434	5.46e-05	0.345331	down	GO:0009536;GO:0031410	K13464	8	plastid; cytoplasmic vesicle	GATA transcription factor 19 isoform X1 [Oryza sativa Japonica Group] &gt;Q0DNU1.2 RecName: Full=GATA transcription factor 19; Short=OsGATA19; AltName: Full=Protein TIFY 1b; Short=OsTIFY1b [Oryza sativa Japonica Group] &gt;KAB8093449.1 hypothetical protein EE612_020284 [Oryza sativa] &gt;EEE59877.1 hypothetical protein OsJ_12477 [Oryza sativa Japonica Group] &gt;KAF2941174.1 hypothetical protein …
LOC_Os05g44400.1	GATA	1.44941	0.00237034	LOC4339348	LOC_Os05g44400	Os05g0520300	3.21439	17.4897	9.23575	28.5629	28.0844	38.6702	0.00795521	2.73097	up	NA	NA	20	NA	GATA transcription factor 12 [Oryza sativa Japonica Group] &gt;EAY98730.1 hypothetical protein OsI_20661 [Oryza sativa Indica Group] &gt;KAB8100231.1 hypothetical protein EE612_030678 [Oryza sativa] &gt;AAT69661.1 unknown protein [Oryza sativa Japonica Group] &gt;AAU44269.1 unknown protein [Oryza sativa Japonica Group] &gt;KAF2931688.1 hypothetical protein DAI22_05g230100 [Oryza sativa Japonica G…
LOC_Os01g24070.1;LOC_Os01g24070.2	GATA	-1.31326	1.72e-05	LOC4326489	LOC_Os01g24070	Os01g0343300	94.5497	73.0821	88.056	52.0011	40.5459	28.4055	0.000128785	0.40241	down	NA	NA	14	NA	GATA transcription factor 23 [Oryza sativa Japonica Group] &gt;AOT80448.1 GATA transcription factor [Oryza sativa Indica Group] &gt;KAB8081307.1 hypothetical protein EE612_002394 [Oryza sativa] &gt;KAF2950006.1 hypothetical protein DAI22_01g159900 [Oryza sativa Japonica Group] &gt;BAB93299.1 unknown protein [Oryza sativa Japonica Group] &gt;BAF04873.1 Os01g0343300 [Oryza sativa Japonica Group]
LOC_Os09g01140.1	GeBP	1.84916	0.000309172	LOC4346364	LOC_Os09g01140	Os09g0100800	0.138968	0.267775	0.137132	0.671663	0.842772	0.850162	0.00144869	3.60291	up	NA	NA	9	NA	uncharacterized protein LOC4346364 isoform X1 [Oryza sativa Japonica Group] &gt;KAF2915042.1 hypothetical protein DAI22_09g001600 [Oryza sativa Japonica Group]
LOC_Os01g32890.1	GeBP	1.55834	7.22e-07	LOC4323982	LOC_Os01g32890	Os01g0512400	0.625309	1.12213	0.87483	2.66246	3.32449	3.19776	9e-06	2.94515	up	NA	NA	2	NA	NA
LOC_Os09g01470.1	GeBP	1.43555	0.0032535	LOC9269165	LOC_Os09g01470	Os09g0102300	0.537702	0.601164	0.370679	1.10421	2.29824	1.53198	0.0103512	2.70486	up	NA	NA	9	NA	uncharacterized protein LOC9269165 [Oryza sativa Japonica Group]
LOC_Os02g53150.1	GeBP	1.31671	4.62e-08	LOC4330871	LOC_Os02g53150	Os02g0771200	3.41213	5.17036	4.18819	10.2704	12.2082	15.3736	8.88e-07	2.49097	up	NA	K18045	20	NA	probable tyrosine-protein phosphatase DSP2 [Oryza sativa Japonica Group]
LOC_Os03g25430.1	GeBP	1.07835	0.000435517	LOC9272499	LOC_Os03g25430	Os03g0370250	2.06501	3.43764	2.04259	5.72942	5.56614	7.51849	0.00192281	2.11162	up	NA	NA	16	NA	NA
LOC_Os05g42130.1	GRAS	-2.63638	2.36e-07	LOC4339232	LOC_Os05g42130	Os05g0500600	5.54679	2.00349	4.83302	1.09796	0.667271	0.589241	3.51e-06	0.160832	down	NA	NA	10	NA	scarecrow-like protein 32 [Oryza sativa Japonica Group] &gt;KAB8100072.1 hypothetical protein EE612_030439 [Oryza sativa] &gt;AAT93866.1 unknown protein [Oryza sativa Japonica Group] &gt;AAU90224.1 unknown protein [Oryza sativa Japonica Group] &gt;KAF2931497.1 hypothetical protein DAI22_05g203000 [Oryza sativa Japonica Group] &gt;BAF17879.1 Os05g0500600 [Oryza sativa Japonica Group]
LOC_Os07g39820.1	GRAS	2.24097	8.87e-06	LOC4343753	LOC_Os07g39820	Os07g0586900	0.661152	2.95038	0.833952	7.29872	7.26939	9.93738	7.4e-05	4.72713	up	NA	NA	2	NA	NA
LOC_Os06g01620.1	GRAS	-1.84997	3.32e-12	LOC107275984	LOC_Os06g01620	Os06g0105100	6.0394	6.6946	8.76076	2.5506	2.22934	2.2559	2.56e-10	0.277399	down	NA	NA	8	NA	scarecrow-like protein 6 [Oryza sativa Japonica Group] &gt;KAF2924750.1 hypothetical protein DAI22_06g002800 [Oryza sativa Japonica Group] &gt;KAF2924751.1 hypothetical protein DAI22_06g002800 [Oryza sativa Japonica Group] &gt;BAS95739.1 Os06g0105350 [Oryza sativa Japonica Group]
LOC_Os12g04370.1	GRAS	1.81415	8.46e-06	LOC107277905	LOC_Os12g04370	Os12g0138166	0.38989	0.93481	0.490178	1.88962	2.46301	3.23788	7.1e-05	3.51651	up	NA	NA	2	NA	scarecrow-like protein 3 [Oryza sativa Japonica Group]
LOC_Os11g47870.1	GRAS	-1.42903	3.94e-08	LOC4351217	LOC_Os11g47870	Os11g0705200	3.88615	4.14126	5.58138	1.7264	2.19346	2.10886	7.81e-07	0.371381	down	NA	NA	19	NA	scarecrow-like protein 9 [Oryza sativa Japonica Group] &gt;AAX95274.1 GRAS family transcription factor, putative [Oryza sativa Japonica Group] &gt;ABA95512.1 GRAS family transcription factor containing protein, expressed [Oryza sativa Japonica Group] &gt;EAZ19321.1 hypothetical protein OsJ_34870 [Oryza sativa Japonica Group] &gt;KAF2912281.1 hypothetical protein DAI22_11g243300 [Oryza sativa Japo…
LOC_Os03g51330.1	GRAS	1.24153	0.000465732	LOC4333948	LOC_Os03g51330	Os03g0723000	1.54951	3.84197	2.62609	5.63568	7.15952	9.68429	0.00203265	2.3645	up	NA	K14494	20	NA	NA
LOC_Os03g09280.1;LOC_Os03g09280.2;LOC_Os03g09280.3	GRAS	-1.24092	3.44e-08	LOC4331920	LOC_Os03g09280	Os03g0193000	55.7384	60.2733	55.2149	31.4536	22.2249	32.0562	7.01e-07	0.423104	down	NA	K14494	11	NA	scarecrow-like protein 21 [Oryza sativa Japonica Group] &gt;XP_015630859.1 scarecrow-like protein 21 [Oryza sativa Japonica Group] &gt;XP_015630860.1 scarecrow-like protein 21 [Oryza sativa Japonica Group] &gt;XP_015630861.1 scarecrow-like protein 21 [Oryza sativa Japonica Group] &gt;XP_015630862.1 scarecrow-like protein 21 [Oryza sativa Japonica Group] &gt;XP_015630863.1 scarecrow-like protein 2…
LOC_Os02g53690.1	GRF	2.99454	0.0101819	LOC4330903	LOC_Os02g53690	Os02g0776900	0.135681	4.14815	0.653403	12.2815	12.545	20.4819	0.0269298	7.96976	up	NA	NA	20	NA	growth-regulating factor 1 [Oryza sativa Japonica Group] &gt;Q6AWY8.1 RecName: Full=Growth-regulating factor 1; Short=OsGRF1; AltName: Full=Transcription activator GRF1 [Oryza sativa Japonica Group] &gt;KAB8089146.1 hypothetical protein EE612_013997 [Oryza sativa] &gt;KAF2947229.1 hypothetical protein DAI22_02g354000 [Oryza sativa Japonica Group] &gt;BAF10202.1 Os02g0776900 [Oryza sativa Japonica…
LOC_Os02g47280.1;LOC_Os02g47280.2	GRF	2.32338	0.000266944	LOC4330436	LOC_Os02g47280	Os02g0701300	0.429493	3.90878	0.963637	6.7114	11.3512	12.9481	0.00128514	5.00505	up	GO:0009536	NA	16	plastid	NA
LOC_Os11g35030.1	GRF	1.22947	9.38e-05	LOC4350711	LOC_Os11g35030	Os11g0551900	2.35619	4.47639	3.4533	6.50137	10.3342	11.9689	0.00053533	2.34482	up	NA	NA	2	NA	growth-regulating factor 8 [Oryza sativa Japonica Group] &gt;Q6AWY1.1 RecName: Full=Growth-regulating factor 8; Short=OsGRF8; AltName: Full=Transcription activator GRF8 [Oryza sativa Japonica Group] &gt;ABA94244.2 expressed protein [Oryza sativa Japonica Group] &gt;KAF2911271.1 hypothetical protein DAI22_11g164300 [Oryza sativa Japonica Group] &gt;BAF28444.1 Os11g0551900 [Oryza sativa Japonica Gr…
LOC_Os07g39320.1	HD-ZIP	7.62691	7.67e-06	LOC4343726	LOC_Os07g39320	Os07g0581700	0	0	0	0.170495	1.51135	0.398508	6.54e-05	197.664	up	NA	K09338	16	NA	homeobox-leucine zipper protein HOX14 [Oryza sativa Japonica Group] &gt;Q7XI85.1 RecName: Full=Homeobox-leucine zipper protein HOX14; AltName: Full=HD-ZIP protein HOX14; AltName: Full=Homeodomain transcription factor HOX14; AltName: Full=OsHox14 [Oryza sativa Japonica Group] &gt;EEC82332.1 hypothetical protein OsI_26626 [Oryza sativa Indica Group] &gt;KAB8106101.1 hypothetical protein EE612_04030…
LOC_Os03g10210.1	HD-ZIP	2.84754	8.59e-14	LOC4331956	LOC_Os03g10210	Os03g0198600	1.50881	2.02058	1.60266	7.43423	15.3397	22.0369	1.05e-11	7.1977	up	NA	K09338	9	NA	homeobox-leucine zipper protein HOX12 [Oryza sativa Japonica Group] &gt;XP_052149088.1 homeobox-leucine zipper protein HOX12 [Oryza glaberrima] &gt;Q10QF2.1 RecName: Full=Homeobox-leucine zipper protein HOX12; AltName: Full=HD-ZIP protein HOX12; AltName: Full=Homeodomain transcription factor HOX12; AltName: Full=OsHox12 [Oryza sativa Japonica Group] &gt;KAB8090657.1 hypothetical protein EE612_015…
LOC_Os06g04850.1	HD-ZIP	2.18863	1.24e-06	LOC4340069	LOC_Os06g04850	Os06g0140400	7.94979	20.4574	7.44026	88.7471	59.7902	38.4345	1.42e-05	4.55871	up	NA	K09338	9	NA	NA
LOC_Os06g10600.1	HD-ZIP	2.18372	4.9e-10	LOC4340445	LOC_Os06g10600	Os06g0208100	7.97375	24.4083	13.663	68.24	86.9134	90.6397	1.85e-08	4.54325	up	NA	K09338	9	NA	NA
LOC_Os04g45810.1	HD-ZIP	-1.79102	2.72e-05	LOC4336542	LOC_Os04g45810	Os04g0541700	14.5355	9.08298	24.2073	3.38772	7.79453	5.57926	0.000189326	0.288967	down	NA	K09338	8	NA	NA
LOC_Os10g23090.2;LOC_Os10g23090.1	HD-ZIP	1.74514	1.98e-12	LOC4348492	LOC_Os10g23090	Os10g0377300	2.03871	2.6585	2.8509	8.97194	11.6972	9.42672	1.6e-10	3.35228	up	NA	K09338	2	NA	homeobox-leucine zipper protein HOX8 [Oryza sativa Japonica Group] &gt;Q338Z7.1 RecName: Full=Homeobox-leucine zipper protein HOX8; AltName: Full=HD-ZIP protein HOX8; AltName: Full=Homeodomain transcription factor HOX8; AltName: Full=OsHox8 [Oryza sativa Japonica Group] &gt;KAB8112547.1 hypothetical protein EE612_051028 [Oryza sativa] &gt;ABB47385.1 Homeobox domain containing protein, expressed […
LOC_Os03g07450.1	HD-ZIP	1.57065	9.94e-07	LOC4331774	LOC_Os03g07450	Os03g0170600	11.8063	30.2	15.8346	59.5205	69.4046	72.8387	1.17e-05	2.97038	up	GO:0003700;GO:0005634;GO:0006355	K09338	9	DNA-binding transcription factor activity; nucleus; regulation of transcription, DNA-templated	homeobox-leucine zipper protein HOX21 [Oryza sativa Japonica Group] &gt;Q8S7W9.1 RecName: Full=Homeobox-leucine zipper protein HOX21; AltName: Full=HD-ZIP protein HOX21; AltName: Full=Homeodomain transcription factor HOX21; AltName: Full=OsHox21 [Oryza sativa Japonica Group] &gt;AAL84311.1 putative DNA-binding protein [Oryza sativa Japonica Group] &gt;ABF94207.1 DNA-binding protein, putative, exp…
LOC_Os10g41230.1	HD-ZIP	-1.30453	1.3e-07	LOC4349388	LOC_Os10g41230	Os10g0561800	11.6583	9.1195	12.7195	4.72589	5.99851	5.49655	2.13e-06	0.404853	down	NA	K09338	11	NA	homeobox-leucine zipper protein HOX1 [Oryza sativa Japonica Group] &gt;Q7XC54.1 RecName: Full=Homeobox-leucine zipper protein HOX1; AltName: Full=HD-ZIP protein HOX1; AltName: Full=Homeodomain transcription factor HOX1; AltName: Full=OsHox1 [Oryza sativa Japonica Group] &gt;KAB8113696.1 hypothetical protein EE612_052789 [Oryza sativa] &gt;AAK31270.1 homeodomain leucine zipper protein hox1 [Oryza …
LOC_Os06g04870.1	HD-ZIP	1.26029	0.00110906	LOC4340070	LOC_Os06g04870	Os06g0140700	14.3489	42.3278	22.1576	90.7326	70.0315	57.0682	0.0041963	2.39543	up	NA	K09338	9	NA	homeobox-leucine zipper protein HOX2 [Oryza sativa Japonica Group] &gt;Q5VPE3.1 RecName: Full=Homeobox-leucine zipper protein HOX2; AltName: Full=HD-ZIP protein HOX2; AltName: Full=Homeodomain transcription factor HOX2; AltName: Full=OsHox2 [Oryza sativa Japonica Group] &gt;Q84U86.1 RecName: Full=Homeobox-leucine zipper protein HOX2; AltName: Full=HD-ZIP protein HOX2; AltName: Full=Homeodomain tr…
LOC_Os09g29460.1	HD-ZIP	-1.10615	7.85e-07	LOC4347333	LOC_Os09g29460	Os09g0470500	107.267	122.281	131.605	76.2386	55.356	65.7818	9.63e-06	0.464532	down	NA	K09338	17	NA	homeobox-leucine zipper protein HOX4 [Oryza sativa Japonica Group] &gt;Q6K498.1 RecName: Full=Homeobox-leucine zipper protein HOX4; AltName: Full=HD-ZIP protein HOX4; AltName: Full=Homeodomain transcription factor HOX4; AltName: Full=OsHox4 [Oryza sativa Japonica Group] &gt;Q9XH37.1 RecName: Full=Homeobox-leucine zipper protein HOX4; AltName: Full=HD-ZIP protein HOX4; AltName: Full=Homeodomain tr…
LOC_Os03g08960.1	HD-ZIP	-1.07497	1.37e-05	LOC4331890	LOC_Os03g08960	Os03g0188900	30.8387	24.6567	36.3509	18.8046	16.2634	16.6003	0.000106618	0.474682	down	NA	K09338	12	NA	NA
LOC_Os01g43590.1;LOC_Os01g43590.2	HSF	-3.03515	1.34e-10	LOC4326685	LOC_Os01g43590	Os01g0625300	3.17181	2.20197	3.67949	0.627204	0.359774	0.302073	6.03e-09	0.121992	down	NA	K09419	8	NA	NA
LOC_Os03g53340.1;LOC_Os03g53340.2;LOC_Os03g53340.3;LOC_Os03g53340.6	HSF	2.95193	0.020407	LOC4334080	LOC_Os03g53340	Os03g0745000	0.03891	0.05449	0	0.063593	0.512219	0.371628	0.0483627	7.73781	up	NA	K09419	5	NA	NA
LOC_Os03g25120.1	HSF	2.58093	0.00154533	LOC107277264	LOC_Os03g25120	Os03g0366800	0.066372	1.43678	0.196596	2.52645	4.17853	5.92924	0.00556592	5.98324	up	NA	K09419	2	NA	heat stress transcription factor B-4d [Oryza sativa Japonica Group] &gt;XP_025880033.1 heat stress transcription factor B-4d [Oryza sativa Japonica Group] &gt;XP_025880034.1 heat stress transcription factor B-4d [Oryza sativa Japonica Group] &gt;XP_025880035.1 heat stress transcription factor B-4d [Oryza sativa Japonica Group] &gt;XP_025880036.1 heat stress transcription factor B-4d [Oryza sativa…
LOC_Os07g44690.1	HSF	2.26591	7.64e-10	LOC4344063	LOC_Os07g44690	Os07g0640900	0.942908	1.6883	1.21939	4.68488	6.91621	10.6617	2.66e-08	4.80958	up	NA	K09419	2	NA	NA
LOC_Os09g35790.1;LOC_Os09g35790.2;LOC_Os09g35790.3	HSF	1.82608	6.93e-14	LOC4347637	LOC_Os09g35790	Os09g0526600	10.1206	9.18536	8.22227	25.7315	46.8401	42.8881	8.9e-12	3.54573	up	NA	K09419	5	NA	heat stress transcription factor B-2c isoform X6 [Oryza sativa Japonica Group]
LOC_Os08g43334.1;LOC_Os08g43334.2	HSF	1.75501	1.8e-11	LOC4346229	LOC_Os08g43334	Os08g0546800	3.13013	2.36463	2.30946	10.1714	11.6749	9.50544	1.08e-09	3.37527	up	NA	K09419	5	NA	heat stress transcription factor B-2b isoform X1 [Oryza sativa Japonica Group] &gt;AAQ23056.1 heat shock factor RHSF2 [Oryza sativa Japonica Group] &gt;BAF24337.1 Os08g0546800 [Oryza sativa Japonica Group]
LOC_Os02g13800.1	HSF	-1.5953	2.46e-05	LOC4328809	LOC_Os02g13800	Os02g0232000	13.3192	14.7266	21.1694	5.41038	10.0014	3.99338	0.000173999	0.330954	down	NA	K09419	8	NA	NA
LOC_Os04g48030.1	HSF	1.34575	1.3e-06	LOC4336701	LOC_Os04g48030	Os04g0568700	3.65781	5.00671	5.30537	10.327	18.6632	13.5024	1.47e-05	2.54161	up	NA	K09419	5	NA	NA
LOC_Os03g06630.1;LOC_Os03g06630.2	HSF	-1.02142	0.000672379	LOC4331707	LOC_Os03g06630	Os03g0161900	127.434	69.1909	84.5806	56.05	63.2436	46.3105	0.00276573	0.492631	down	NA	K08967	14	NA	NA
LOC_Os01g03890.1	LBD	6.2308	0.00100644	LOC4325972	LOC_Os01g03890	Os01g0129600	0	0	0	0.127322	0.274433	0.344188	0.00386952	75.103	up	NA	NA	9	NA	LOB domain-containing protein 40 [Oryza sativa Japonica Group] &gt;EAZ10404.1 hypothetical protein OsJ_00237 [Oryza sativa Japonica Group] &gt;KAF2948224.1 hypothetical protein DAI22_01g020600 [Oryza sativa Japonica Group] &gt;BAB03390.1 putative seed specific protein Bn15D17A [Oryza sativa Japonica Group] &gt;BAF03832.1 Os01g0129600 [Oryza sativa Japonica Group]
LOC_Os03g05500.1	LBD	-3.25256	5.96e-10	LOC4331627	LOC_Os03g05500	Os03g0149000	2.0594	2.94951	4.29988	0.498756	0.327083	0.289107	2.18e-08	0.104926	down	NA	NA	8	NA	LOB domain-containing protein 16 [Oryza sativa Japonica Group] &gt;XP_052148504.1 LOB domain-containing protein 16-like [Oryza glaberrima] &gt;KAB8090201.1 hypothetical protein EE612_015322 [Oryza sativa] &gt;ABF93993.1 expressed protein [Oryza sativa Japonica Group] &gt;KAF2937295.1 hypothetical protein DAI22_03g039700 [Oryza sativa Japonica Group] &gt;BAD88524.1 LOB domain protein [Oryza sativa…
LOC_Os01g07480.1;LOC_Os01g07480.2	LBD	2.50375	0.000894232	LOC4325196	LOC_Os01g07480	Os01g0169400	0.081234	0.968436	0.131418	1.61371	3.24856	3.07243	0.00351667	5.67159	up	NA	NA	2	NA	protein LATERAL ORGAN BOUNDARIES [Oryza sativa Japonica Group] &gt;XP_025878847.1 protein LATERAL ORGAN BOUNDARIES [Oryza sativa Japonica Group] &gt;KAF2948631.1 hypothetical protein DAI22_01g048900 [Oryza sativa Japonica Group] &gt;BAB39926.1 P0028E10.30 [Oryza sativa Japonica Group] &gt;BAB92516.1 putative LOB domain protein 25 [Oryza sativa Japonica Group] &gt;BAD88527.1 LOB domain protein [Or…
LOC_Os01g32770.1	LBD	1.81606	1.03e-06	LOC4324028	LOC_Os01g32770	Os01g0511000	30.882	30.3124	13.8486	120.528	120.161	69.8551	1.21e-05	3.52118	up	NA	NA	5	NA	LOB domain-containing protein 40 [Oryza sativa Japonica Group] &gt;KAB8081614.1 hypothetical protein EE612_002990 [Oryza sativa] &gt;KAF2950407.1 hypothetical protein DAI22_01g184000 [Oryza sativa Japonica Group]
LOC_Os05g03160.1	LBD	1.58299	0.0197868	LOC107278669	LOC_Os05g03160	Os05g0123000	1.4125	0.770969	0.312911	2.69805	4.97218	1.34943	0.0471022	2.99591	up	NA	NA	4	NA	LOB domain-containing protein 1 [Oryza sativa Japonica Group] &gt;KAF2928907.1 hypothetical protein DAI22_05g017800 [Oryza sativa Japonica Group]
LOC_Os03g41330.1	LBD	-1.37219	0.00160517	LOC4333430	LOC_Os03g41330	Os03g0609500	14.9102	12.6996	10.6718	8.16469	6.40368	2.66353	0.00574807	0.386304	down	NA	NA	19	NA	LOB domain-containing protein 38 [Oryza sativa Japonica Group] &gt;KAB8092611.1 hypothetical protein EE612_018882 [Oryza sativa] &gt;AAR87344.1 hypothetical protein LOC_Os03g41330 [Oryza sativa Japonica Group] &gt;ABF97569.1 LOB domain protein 40, putative, expressed [Oryza sativa Japonica Group] &gt;KAF2940204.1 hypothetical protein DAI22_03g254100 [Oryza sativa Japonica Group] &gt;BAF12562.1 Os…
LOC_Os04g51000.1	LFY	2.42141	9.06e-05	LOC4336857	LOC_Os04g51000	Os04g0598300	0.319291	0.37775	0.176974	0.850608	3.39052	1.55914	0.000520063	5.35695	up	NA	NA	2	NA	NA
LOC_Os08g06280.1;LOC_Os08g06280.2;LOC_Os08g06280.3;LOC_Os08g06280.4;LOC_Os08g06280.7;LOC_Os08g06280.8;LOC_Os08g06280.9	LSD	-1.28138	2.74e-10	LOC4344713	LOC_Os08g06280	Os08g0159500	159.858	145.265	182.932	81.0047	80.3071	74.3272	1.11e-08	0.411401	down	NA	NA	17	NA	protein LSD1 isoform X2 [Oryza sativa Japonica Group]
LOC_Os06g45650.1	MIKC_MADS	6.10929	0.00253057	LOC4341786	LOC_Os06g45650	Os06g0667200	0	0	0	0.036873	0.162916	0.208553	0.00839463	69.0364	up	NA	K09264	6	NA	MADS-box transcription factor 30 isoform X1 [Oryza sativa Japonica Group]
LOC_Os08g41960.1	MIKC_MADS	-3.79591	1.06e-05	LOC4346135	LOC_Os08g41960	Os08g0531900	2.24802	0.289341	1.56005	0.051628	0.167933	0.099205	8.57e-05	0.0719973	down	NA	K09264	17	NA	MADS-box transcription factor 51-like isoform X1 [Oryza sativa Japonica Group]
LOC_Os02g49840.1;LOC_Os02g49840.2;LOC_Os02g49840.4;LOC_Os02g49840.3	MIKC_MADS	-1.2835	0.000141995	LOC4330621	LOC_Os02g49840	Os02g0731200	5.58477	5.62163	7.38975	3.42535	3.52571	2.1037	0.000755036	0.410798	down	NA	K09264	14	NA	MADS-box transcription factor 57 isoform X1 [Oryza sativa Japonica Group] &gt;XP_052143628.1 MADS-box transcription factor 57 isoform X1 [Oryza glaberrima]
LOC_Os06g49840.1;LOC_Os06g49840.2	MIKC_MADS	-1.22362	3.37e-06	LOC4342047	LOC_Os06g49840	Os06g0712700	27.4647	32.5177	38.3097	19.4569	16.8091	13.1585	3.31e-05	0.428206	down	NA	K09264	11	NA	MADS-box transcription factor 16 [Oryza sativa Japonica Group] &gt;Q944S9.2 RecName: Full=MADS-box transcription factor 16; AltName: Full=OsMADS16; AltName: Full=Protein APETALA3-like; AltName: Full=Protein SUPERWOMAN1 [Oryza sativa Japonica Group] &gt;KAF2928457.1 hypothetical protein DAI22_06g280100 [Oryza sativa Japonica Group] &gt;BAA81881.1 MADS box-like protein [Oryza sativa Japonica Group]…
LOC_Os10g39130.1;LOC_Os10g39130.2	MIKC_MADS	-1.16911	1.48e-05	LOC4349237	LOC_Os10g39130	Os10g0536100	48.0219	40.3423	60.4839	24.4144	33.3959	21.1247	0.000113799	0.444694	down	NA	K09264	11	NA	NA
LOC_Os05g37060.1	MYB	8.02148	7.29e-08	LOC4338925	LOC_Os05g37060	Os05g0442400	0	0	0	0.443794	1.4372	1.36937	1.31e-06	259.84	up	NA	NA	1	NA	transcription factor DIVARICATA [Oryza sativa Japonica Group] &gt;EAY98215.1 hypothetical protein OsI_20126 [Oryza sativa Indica Group] &gt;KAB8099626.1 hypothetical protein EE612_029785 [Oryza sativa] &gt;AAT69605.1 putative myb-like transcription factor [Oryza sativa Japonica Group] &gt;AAU90097.1 putative myb-like transcription factor [Oryza sativa Japonica Group] &gt;EEE63882.1 hypothetical p…
LOC_Os01g52410.1	MYB	-3.75285	0.0121781	LOC4324664	LOC_Os01g52410	Os01g0722300	0.584544	0.242661	1.0859	0.147519	0	0	0.0312549	0.0741786	down	NA	K09422	12	NA	transcription repressor MYB5 [Oryza sativa Japonica Group] &gt;XP_052138364.1 transcription repressor MYB5-like [Oryza glaberrima] &gt;EAY75656.1 hypothetical protein OsI_03562 [Oryza sativa Indica Group] &gt;KAF2952063.1 hypothetical protein DAI22_01g307500 [Oryza sativa Japonica Group] &gt;BAD87052.1 blind-like [Oryza sativa Japonica Group] &gt;BAD87407.1 blind-like [Oryza sativa Japonica Group…
LOC_Os12g03150.1	MYB	-3.6163	0.000116295	LOC4351379	LOC_Os12g03150	Os12g0125000	23.7553	56.7749	48.6365	7.34007	0.64502	3.92412	0.000640169	0.0815427	down	NA	K09422	14	NA	myb-related protein 306 [Oryza sativa Japonica Group] &gt;EAY82118.1 hypothetical protein OsI_37315 [Oryza sativa Indica Group] &gt;ABA96337.1 Myb-like DNA-binding domain containing protein, expressed [Oryza sativa Japonica Group] &gt;EAZ19502.1 hypothetical protein OsJ_35067 [Oryza sativa Japonica Group] &gt;KAF2906442.1 hypothetical protein DAI22_12g018400 [Oryza sativa Japonica Group] &gt;CAA7…
LOC_Os11g03440.1	MYB	-3.57531	9.25e-10	LOC4349657	LOC_Os11g03440	Os11g0128500	23.6779	52.3755	44.1345	6.60833	0.903196	3.96833	3.13e-08	0.0838929	down	NA	K09422	14	NA	myb-related protein 306 [Oryza sativa Japonica Group] &gt;XP_052136887.1 transcription factor MYB60-like [Oryza glaberrima] &gt;EAY79788.1 hypothetical protein OsI_34944 [Oryza sativa Indica Group] &gt;ABA91289.1 Myb-like DNA-binding domain containing protein, expressed [Oryza sativa Japonica Group] &gt;EAZ17275.1 hypothetical protein OsJ_32794 [Oryza sativa Japonica Group] &gt;KAF2909282.1 hypot…
LOC_Os01g64360.1	MYB	3.53644	1.85e-25	LOC4324783	LOC_Os01g64360	Os01g0863300	1.2744	1.2021	0.723802	12.8972	19.2889	12.2588	3.79e-22	11.6031	up	NA	NA	5	NA	transcription factor DIVARICATA [Oryza sativa Japonica Group] &gt;EAZ14242.1 hypothetical protein OsJ_04166 [Oryza sativa Japonica Group] &gt;KAF2953455.1 hypothetical protein DAI22_01g409600 [Oryza sativa Japonica Group]
LOC_Os02g09480.1	MYB	3.29245	1.54e-22	LOC4328551	LOC_Os02g09480	Os02g0187700	2.81584	7.07445	3.62427	53.5468	57.0697	43.9685	1.87e-19	9.79777	up	NA	K09422	9	NA	NA
LOC_Os02g42870.1	MYB	3.00793	0.00324058	LOC4330121	LOC_Os02g42870	Os02g0641900	0.115468	0.380672	0	0.961002	2.03483	1.73544	0.0103191	8.04409	up	NA	K09422	16	NA	NA
LOC_Os11g47460.1;LOC_Os11g47460.2;LOC_Os11g47460.3;LOC_Os11g47460.4	MYB	-2.98678	4.54e-11	LOC4351184	LOC_Os11g47460	Os11g0700500	17.7026	7.9803	18.2941	1.81402	3.48947	1.43597	2.4e-09	0.126151	down	NA	K09422	8	NA	NA
LOC_Os08g33940.1	MYB	-2.91064	7.78e-10	LOC9272734	LOC_Os08g33940	Os08g0437300	47.2654	71.3754	60.1305	16.4331	4.61489	6.017	2.71e-08	0.132988	down	NA	K09422	8	NA	myb-related protein 306 [Oryza sativa Japonica Group] &gt;KAF2919838.1 hypothetical protein DAI22_08g165000 [Oryza sativa Japonica Group] &gt;BAD10148.1 putative typical P-type R2R3 Myb protein [Oryza sativa Japonica Group] &gt;BAH94325.1 Os08g0437200 [Oryza sativa Japonica Group]
LOC_Os04g50770.1	MYB	-2.23384	0.000262494	LOC4336841	LOC_Os04g50770	Os04g0594100	21.7228	7.83982	16.5065	7.23671	2.78788	1.29546	0.00127037	0.212592	down	NA	K09422	8	NA	myb-related protein Zm1 [Oryza sativa Japonica Group] &gt;CAH67984.1 OSIGBa0142I02-OSIGBa0101B20.27 [Oryza sativa] &gt;KAF2935620.1 hypothetical protein DAI22_04g245400 [Oryza sativa Japonica Group] &gt;CAD41558.3 OSJNBa0006A01.12 [Oryza sativa Japonica Group] &gt;CAE04147.1 OSJNBa0009P12.32 [Oryza sativa Japonica Group] &gt;BAF15640.1 Os04g0594100 [Oryza sativa Japonica Group]
LOC_Os08g33150.1	MYB	-2.09633	1.94e-05	LOC4345623	LOC_Os08g33150	Os08g0428200	15.5388	6.13207	9.25263	4.29966	2.47833	1.70823	0.00014308	0.233853	down	NA	K09422	10	NA	transcription factor MYB20 [Oryza sativa Japonica Group] &gt;CAC85050.1 Myb51 protein [Oryza sativa] &gt;KAF2919752.1 hypothetical protein DAI22_08g159300 [Oryza sativa Japonica Group] &gt;KAF2919753.1 hypothetical protein DAI22_08g159300 [Oryza sativa Japonica Group] &gt;BAC75626.1 Myb51 protein [Oryza sativa Japonica Group] &gt;BAD01194.1 Myb51 protein [Oryza sativa Japonica Group]
LOC_Os12g07640.1	MYB	-2.07214	0.000102925	LOC9272091	LOC_Os12g07640	Os12g0175400	1.28368	2.03423	2.18739	0.681428	0.556458	0.27909	0.00057877	0.237806	down	GO:0009536	K09422	17	plastid	myb-related protein 308 [Oryza sativa Japonica Group] &gt;ABA96597.1 MYB10, putative, expressed [Oryza sativa Japonica Group] &gt;KAF2906880.1 hypothetical protein DAI22_12g053700 [Oryza sativa Japonica Group] &gt;BAG88524.1 unnamed protein product [Oryza sativa Japonica Group] &gt;BAH95541.1 Os12g0175400 [Oryza sativa Japonica Group]
LOC_Os01g74410.1;LOC_Os01g74410.2	MYB	-2.02186	2.54e-06	LOC4324302	LOC_Os01g74410	Os01g0975300	29.082	9.14852	21.648	6.55034	6.11543	4.99699	2.6e-05	0.24624	down	NA	K09422	12	NA	transcription factor MYB59 [Oryza sativa Japonica Group] &gt;AAU84433.1 MYB transcription factor [Oryza sativa Japonica Group] &gt;EAZ15015.1 hypothetical protein OsJ_04957 [Oryza sativa Japonica Group] &gt;KAF2954568.1 hypothetical protein DAI22_01g492500 [Oryza sativa Japonica Group]
LOC_Os12g37970.1;LOC_Os12g37970.2;LOC_Os12g37970.3	MYB	-2.01713	5.92e-11	LOC4352559	LOC_Os12g37970	Os12g0567300	105.939	69.8775	147.972	29.038	37.6936	29.5043	3.02e-09	0.24705	down	NA	K09422	17	NA	myb-related protein MYBAS2 isoform X1 [Oryza sativa Japonica Group]
LOC_Os01g18240.1	MYB	-2.00536	1.2e-10	LOC4327914	LOC_Os01g18240	Os01g0285300	184.902	184.73	190.123	76.9136	44.1495	41.3543	5.5e-09	0.249072	down	NA	K09422	8	NA	transcription factor MYB61 [Oryza sativa Japonica Group] &gt;KAB8081039.1 hypothetical protein EE612_001879 [Oryza sativa] &gt;EAZ11477.1 hypothetical protein OsJ_01345 [Oryza sativa Japonica Group] &gt;KAF2949694.1 hypothetical protein DAI22_01g130300 [Oryza sativa Japonica Group] &gt;BAB39972.1 putative transcription factor (myb) [Oryza sativa Japonica Group] &gt;BAB39987.1 putative MYB2 [Oryza…
LOC_Os02g41510.1	MYB	1.97749	1.24e-05	LOC4330027	LOC_Os02g41510	Os02g0624300	0.544317	0.437941	0.4774	2.17478	2.90883	1.86701	9.8e-05	3.93808	up	NA	K09422	5	NA	transcription factor MYB30-like [Oryza sativa Japonica Group] &gt;XP_052145300.1 transcription factor MYB30 [Oryza glaberrima] &gt;Q6K1S6.1 RecName: Full=Transcription factor MYB30; Short=OsMYB30 [Oryza sativa Japonica Group] &gt;EAY86754.1 hypothetical protein OsI_08134 [Oryza sativa Indica Group] &gt;KAB8088012.1 hypothetical protein EE612_012406 [Oryza sativa] &gt;EAZ23866.1 hypothetical prote…
LOC_Os04g38740.1	MYB	1.91623	0.00281061	LOC4336055	LOC_Os04g38740	Os04g0461000	0.433721	4.78147	1.54155	10.1159	7.87652	11.3595	0.00917863	3.77435	up	NA	K09422	2	NA	transcription factor MYB106 [Oryza sativa Japonica Group] &gt;EAY94406.1 hypothetical protein OsI_16174 [Oryza sativa Indica Group] &gt;KAF2934342.1 hypothetical protein DAI22_04g155800 [Oryza sativa Japonica Group] &gt;CAD40986.2 OSJNBa0072F16.11 [Oryza sativa Japonica Group] &gt;BAF14907.1 Os04g0461000 [Oryza sativa Japonica Group] &gt;BAS89548.1 Os04g0461000 [Oryza sativa Japonica Group]
LOC_Os01g09590.1	MYB	-1.91166	1.71e-10	LOC4327303	LOC_Os01g09590	Os01g0191900	6.03489	5.47322	7.17448	1.56361	2.54642	1.72687	7.44e-09	0.265787	down	NA	K09422	11	NA	transcription factor RAX2 [Oryza sativa Japonica Group] &gt;XP_015628427.1 transcription factor RAX2 [Oryza sativa Japonica Group] &gt;EAZ10868.1 hypothetical protein OsJ_00708 [Oryza sativa Japonica Group] &gt;BAA99440.1 putative typical P-type R2R3 Myb protein [Oryza sativa Japonica Group] &gt;BAB12688.1 putative typical P-type R2R3 Myb protein [Oryza sativa Japonica Group] &gt;BAF04189.1 Os01g…
LOC_Os06g10350.1	MYB	-1.83014	1.58e-10	LOC4340430	LOC_Os06g10350	Os06g0205100	4.3197	4.75053	5.77402	1.70932	1.78458	1.44195	6.9e-09	0.281237	down	NA	K09422	17	NA	anthocyanin regulatory C1 protein [Oryza sativa Japonica Group] &gt;BAD36195.1 Myb protein [Oryza sativa Japonica Group] &gt;BAF19004.1 Os06g0205100 [Oryza sativa Japonica Group]
LOC_Os06g43090.1	MYB	1.72537	6.26e-12	LOC4341607	LOC_Os06g43090	Os06g0637500	17.52	24.1037	19.9186	95.233	78.6468	64.2799	4.47e-10	3.30665	up	NA	K09422	5	NA	NA
LOC_Os02g40530.1	MYB	1.62588	0.000968743	LOC4330001	LOC_Os02g40530	Os02g0618400	0.384083	0.468222	0.523868	1.26079	1.25727	2.63232	0.00375325	3.0863	up	NA	K09422	5	NA	transcription factor MYB57 [Oryza sativa Japonica Group] &gt;EAZ23831.1 hypothetical protein OsJ_07548 [Oryza sativa Japonica Group] &gt;BAD21458.1 putative MYB transcription factor [Oryza sativa Japonica Group] &gt;BAD21600.1 putative MYB transcription factor [Oryza sativa Japonica Group] &gt;BAF09363.1 Os02g0618400 [Oryza sativa Japonica Group] &gt;BAG99431.1 unnamed protein product [Oryza sati…
LOC_Os02g36890.1	MYB	1.51895	0.000930744	LOC4329770	LOC_Os02g36890	Os02g0579300	4.02678	18.2264	8.38527	39.5466	32.4152	29.191	0.00363507	2.86582	up	NA	K09422	9	NA	transcription factor MYB106 [Oryza sativa Japonica Group] &gt;EAY86420.1 hypothetical protein OsI_07800 [Oryza sativa Indica Group] &gt;KAF2945499.1 hypothetical protein DAI22_02g220600 [Oryza sativa Japonica Group] &gt;BAF09143.1 Os02g0579300 [Oryza sativa Japonica Group]
LOC_Os05g28320.1	MYB	-1.50647	6.07e-06	LOC4338503	LOC_Os05g28320	Os05g0350900	4.43572	6.73911	5.65036	2.9941	1.92637	1.97655	5.38e-05	0.351971	down	NA	NA	10	NA	transcription factor MYB77 [Oryza sativa Japonica Group]
LOC_Os08g33660.1	MYB	1.5048	0.000392206	LOC4345652	LOC_Os08g33660	Os08g0433400	8.59042	34.634	24.7946	86.3698	69.8017	67.375	0.00176698	2.83785	up	NA	K09422	2	NA	transcription factor MYB106 [Oryza sativa Japonica Group] &gt;XP_052165507.1 transcription factor MYB106-like [Oryza glaberrima] &gt;EAZ07091.1 hypothetical protein OsI_29338 [Oryza sativa Indica Group] &gt;EAZ42840.1 hypothetical protein OsJ_27428 [Oryza sativa Japonica Group] &gt;KAF2919803.1 hypothetical protein DAI22_08g162700 [Oryza sativa Japonica Group] &gt;CAD44619.1 MYB27 protein [Oryza …
LOC_Os01g12860.1	MYB	1.49897	0.000168554	LOC4327192	LOC_Os01g12860	Os01g0229000	2.60686	8.6569	3.72652	13.4463	15.7629	20.5248	0.000875124	2.8264	up	NA	NA	20	NA	transcription factor MYB3R-1 [Oryza sativa Japonica Group] &gt;KAF2949217.1 hypothetical protein DAI22_01g090800 [Oryza sativa Japonica Group]
LOC_Os04g43680.1	MYB	1.47621	1.33e-07	LOC4336407	LOC_Os04g43680	Os04g0517100	8.9919	14.1829	7.17694	34.1966	31.6736	33.2675	2.17e-06	2.78216	up	NA	K09422	5	NA	NA
LOC_Os01g51260.1	MYB	1.45692	0.00786037	LOC4327821	LOC_Os01g51260	Os01g0709000	0.407257	2.12653	2.06631	5.28594	5.26916	4.22847	0.0218038	2.74521	up	NA	K09422	7	NA	myb-related protein Zm38 [Oryza sativa Japonica Group] &gt;KAF2951920.1 hypothetical protein DAI22_01g298100 [Oryza sativa Japonica Group] &gt;BAF05945.1 Os01g0709000 [Oryza sativa Japonica Group] &gt;BAS73963.1 Os01g0709000 [Oryza sativa Japonica Group]
LOC_Os02g46780.1	MYB	-1.43989	0.000395069	LOC4330397	LOC_Os02g46780	Os02g0695200	2.32897	2.85362	2.49869	1.45506	0.687961	1.17006	0.00177667	0.368595	down	NA	K09422	8	NA	myb-related protein Zm1 [Oryza sativa Japonica Group] &gt;EAZ24264.1 hypothetical protein OsJ_08015 [Oryza sativa Japonica Group] &gt;KAF2946464.1 hypothetical protein DAI22_02g295500 [Oryza sativa Japonica Group] &gt;BAD07916.1 putative myb-related protein 1 [Oryza sativa Japonica Group] &gt;BAD08151.1 putative myb-related protein 1 [Oryza sativa Japonica Group] &gt;BAF09723.1 Os02g0695200 [Oryz…
LOC_Os01g19970.1	MYB	-1.43255	1.52e-09	LOC4323911	LOC_Os01g19970	Os01g0305900	27.3278	20.3219	24.5925	11.325	10.4838	9.98083	4.81e-08	0.370475	down	NA	K09422	10	NA	myb-related protein P [Oryza sativa Japonica Group] &gt;EEE54417.1 hypothetical protein OsJ_01463 [Oryza sativa Japonica Group] &gt;BAB20661.1 putative R2R3 Myb transcription factor MYB-IF35 [Oryza sativa Japonica Group] &gt;BAB64029.1 putative R2R3 Myb transcription factor MYB-IF35 [Oryza sativa Japonica Group] &gt;BAS71749.1 Os01g0305900 [Oryza sativa Japonica Group]
LOC_Os06g14670.1	MYB	-1.37247	0.00147124	LOC4340683	LOC_Os06g14670	Os06g0258000	2.79699	2.06558	1.54062	1.05315	1.15934	0.717479	0.00534454	0.38623	down	NA	K09422	12	NA	protein ODORANT1 [Oryza sativa Japonica Group] &gt;ADB84639.1 Myb related transcription factor [Oryza sativa Japonica Group] &gt;EAZ36535.1 hypothetical protein OsJ_20870 [Oryza sativa Japonica Group] &gt;BAD46186.1 putative myb factor [Oryza sativa Japonica Group] &gt;BAD46321.1 putative myb factor [Oryza sativa Japonica Group] &gt;BAF19236.1 Os06g0258000 [Oryza sativa Japonica Group]
LOC_Os02g42850.2;LOC_Os02g42850.1	MYB	1.36536	6.55e-05	LOC4330115	LOC_Os02g42850	Os02g0641300	1.91067	4.67688	3.27018	8.10867	11.9386	10.0175	0.000395906	2.5764	up	NA	K09422	9	NA	transcription factor MYB21 [Oryza sativa Japonica Group] &gt;ACF60467.1 ATMYB4-like protein [Oryza sativa Japonica Group] &gt;EAZ23961.1 hypothetical protein OsJ_07687 [Oryza sativa Japonica Group] &gt;BAD25225.1 ATMYB4-like [Oryza sativa Japonica Group] &gt;BAD25373.1 ATMYB4-like [Oryza sativa Japonica Group]
LOC_Os02g51799.1	MYB	1.35275	0.00303679	LOC4330764	LOC_Os02g51799	Os02g0754400	0.32745	0.488701	0.309794	1.02357	1.35909	1.07717	0.00979373	2.55399	up	NA	K09422	7	NA	transcription factor MYB41 [Oryza sativa Japonica Group] &gt;XP_052143679.1 transcription factor MYB41-like [Oryza glaberrima] &gt;EEE57826.1 hypothetical protein OsJ_08424 [Oryza sativa Japonica Group] &gt;KAF2947019.1 hypothetical protein DAI22_02g338000 [Oryza sativa Japonica Group] &gt;BAD17238.1 putative P-type R2R3 Myb protein [Oryza sativa Japonica Group]
LOC_Os08g37970.1	MYB	1.34452	5.72e-05	LOC4345885	LOC_Os08g37970	Os08g0486300	2.40053	4.1824	2.31003	8.67861	10.9304	6.95558	0.000353671	2.53946	up	NA	K09422	9	NA	transcription factor MYB93 [Oryza sativa Japonica Group] &gt;KAF2920201.1 hypothetical protein DAI22_08g192600 [Oryza sativa Japonica Group] &gt;BAD09322.1 putative transcription factor Myb protein [Oryza sativa Japonica Group] &gt;BAF24009.1 Os08g0486300 [Oryza sativa Japonica Group]
LOC_Os03g51110.1	MYB	-1.264	0.00189291	LOC4333934	LOC_Os03g51110	Os03g0720800	9.40755	9.38314	12.709	7.90871	3.75922	3.53501	0.00659171	0.416389	down	NA	NA	11	NA	transcription factor MYB52 [Oryza sativa Japonica Group] &gt;XP_052146736.1 transcription factor MYB52-like [Oryza glaberrima] &gt;KAB8093331.1 hypothetical protein EE612_020106 [Oryza sativa] &gt;AAM47303.1 putative Myb/Myb-related protein [Oryza sativa Japonica Group] &gt;AAT77852.1 putative Myb-like DNA-binding protein [Oryza sativa Japonica Group] &gt;ABF98587.1 Myb-like DNA-binding domain co…
LOC_Os03g20090.1	MYB	-1.09721	0.00256665	LOC4332651	LOC_Os03g20090	Os03g0315400	4.15177	3.47173	5.45307	2.26223	3.31605	1.7074	0.00849319	0.467418	down	NA	K09422	19	NA	transcription factor MYB2 [Oryza sativa Japonica Group] &gt;Q10MB4.1 RecName: Full=Transcription factor MYB2; AltName: Full=Myb-related protein 2; Short=OsMYB2 [Oryza sativa Japonica Group] &gt;ABF95617.1 Myb-like DNA-binding domain containing protein, expressed [Oryza sativa Japonica Group] &gt;KAF2938963.1 hypothetical protein DAI22_03g156300 [Oryza sativa Japonica Group] &gt;BAF11851.1 Os03g03…
LOC_Os09g36730.1	MYB	-1.07171	7.08e-05	LOC9271088	LOC_Os09g36730	Os09g0538400	78.8516	129.07	99.3726	55.1444	46.5249	42.9388	0.00042281	0.475754	down	NA	K09422	8	NA	myb-related protein Hv1-like [Oryza sativa Japonica Group] &gt;XP_025876044.1 myb-related protein Hv1-like [Oryza sativa Japonica Group] &gt;XP_052166766.1 myb-related protein Hv1-like [Oryza glaberrima] &gt;EAZ09902.1 hypothetical protein OsI_32196 [Oryza sativa Indica Group] &gt;KAB8111517.1 hypothetical protein EE612_049198 [Oryza sativa] &gt;ADX60239.1 MYB transcription factor, partial [Oryza…
LOC_Os07g43580.1	MYB	1.05657	1.5e-06	LOC4343988	LOC_Os07g43580	Os07g0629000	3.70349	3.8787	4.52592	10.3413	9.4571	10.06	1.66e-05	2.07998	up	NA	K09422	9	NA	transcription factor MYB30 [Oryza sativa Japonica Group] &gt;AAP92746.1 putative myb protein [Oryza sativa Japonica Group] &gt;KAF2924039.1 hypothetical protein DAI22_07g238700 [Oryza sativa Japonica Group]
LOC_Os05g38460.1	MYB	1.02693	0.00455714	LOC4339005	LOC_Os05g38460	Os05g0459000	1.20274	3.10638	2.02037	4.00619	4.97792	6.3073	0.0137914	2.03769	up	NA	NA	2	NA	transcription factor MYB3R-2-like [Oryza sativa Japonica Group] &gt;KAF2931121.1 hypothetical protein DAI22_05g186500 [Oryza sativa Japonica Group] &gt;KAF2931122.1 hypothetical protein DAI22_05g186500 [Oryza sativa Japonica Group]
LOC_Os01g49160.1	MYB	1.00917	0.000523391	LOC9268190	LOC_Os01g49160	Os01g0685400	2.44224	4.55526	3.1098	8.19209	8.33966	7.40271	0.00224608	2.01275	up	NA	K09422	9	NA	transcription factor MYB4-like [Oryza sativa Japonica Group] &gt;XP_052146336.1 transcription factor MYB4-like [Oryza glaberrima] &gt;EAY75402.1 hypothetical protein OsI_03303 [Oryza sativa Indica Group] &gt;KAF2951705.1 hypothetical protein DAI22_01g282200 [Oryza sativa Japonica Group] &gt;BAB86065.1 myb-related transcription factor LBM2-like [Oryza sativa Japonica Group] &gt;BAB92703.1 myb-rela…
LOC_Os04g45020.1	MYB	1.00892	0.00323167	LOC4336500	LOC_Os04g45020	Os04g0532800	1.6256	3.51895	2.59185	5.69407	7.48402	5.16518	0.0102977	2.01241	up	NA	K09422	3	NA	transcription factor LAF1 [Oryza sativa Japonica Group] &gt;EAY94956.1 hypothetical protein OsI_16764 [Oryza sativa Indica Group] &gt;KAB8096233.1 hypothetical protein EE612_024592 [Oryza sativa] &gt;KAF2935078.1 hypothetical protein DAI22_04g206600 [Oryza sativa Japonica Group] &gt;CAE04569.1 OSJNBb0039L24.8 [Oryza sativa Japonica Group] &gt;BAF15320.1 Os04g0532800 [Oryza sativa Japonica Group]
LOC_Os05g07010.1;LOC_Os05g07010.2	MYB_related	4.0693	0.00307989	LOC9266268	LOC_Os05g07010	Os05g0162800	0.191545	0	0	2.34347	0.756157	0.779665	0.00989989	16.7873	up	NA	NA	1	NA	NA
LOC_Os05g50340.1	MYB_related	-2.40183	2.93e-08	LOC4339715	LOC_Os05g50340	Os05g0579600	8.85675	4.72796	11.8342	2.13992	1.86319	1.68968	6.14e-07	0.189224	down	GO:0005739	NA	17	mitochondrion	protein RADIALIS-like 3 [Oryza sativa Japonica Group] &gt;XP_052156390.1 protein RADIALIS-like 3 [Oryza glaberrima] &gt;EAY99166.1 hypothetical protein OsI_21125 [Oryza sativa Indica Group] &gt;KAB8100737.1 hypothetical protein EE612_031331 [Oryza sativa] &gt;EEE64813.1 hypothetical protein OsJ_19669 [Oryza sativa Japonica Group] &gt;KAF2932287.1 hypothetical protein DAI22_05g276100 [Oryza sativa…
LOC_Os10g41260.1	MYB_related	-2.33661	4.14e-12	LOC4349391	LOC_Os10g41260	Os10g0562100	144.866	88.2212	131.513	34.3005	32.4329	18.6756	3.11e-10	0.197975	down	NA	NA	8	NA	NA
LOC_Os08g06110.2;LOC_Os08g06110.3;LOC_Os08g06110.4;LOC_Os08g06110.5	MYB_related	-2.07948	1.51e-06	LOC4344703	LOC_Os08g06110	Os08g0157600	40.6147	38.6697	106.887	10.8682	23.8908	18.4202	1.67e-05	0.236599	down	NA	K12133	17	NA	protein LHY isoform X1 [Oryza sativa Japonica Group] &gt;XP_015649836.1 protein LHY isoform X1 [Oryza sativa Japonica Group] &gt;XP_015649837.1 protein LHY isoform X1 [Oryza sativa Japonica Group] &gt;XP_025875636.1 protein LHY isoform X1 [Oryza sativa Japonica Group] &gt;XP_025875637.1 protein LHY isoform X1 [Oryza sativa Japonica Group] &gt;XP_025875638.1 protein LHY isoform X1 [Oryza sativa Ja…
LOC_Os02g46030.1	MYB_related	-1.7157	0.00857751	LOC4330349	LOC_Os02g46030	Os02g0685200	0.812701	0.348883	1.24209	0.258806	0.431431	0.178904	0.0234008	0.304455	down	NA	NA	12	NA	protein REVEILLE 1 isoform X1 [Oryza sativa Japonica Group]
LOC_Os02g45670.1	MYB_related	-1.55292	8.1e-08	LOC9272080	LOC_Os02g45670	Os02g0680700	37.5927	22.0325	38.1016	13.3321	14.027	13.4031	1.44e-06	0.340819	down	NA	NA	17	NA	protein REVEILLE 6 isoform X1 [Oryza sativa Japonica Group]
LOC_Os06g01670.1	MYB_related	-1.49984	3.2e-10	LOC4339863	LOC_Os06g01670	Os06g0105800	23.6325	22.8129	32.6304	10.8251	12.3546	10.0451	1.28e-08	0.353594	down	NA	NA	8	NA	protein REVEILLE 6 [Oryza sativa Japonica Group] &gt;BAD67706.1 putative MYB29 protein [Oryza sativa Japonica Group] &gt;BAF18473.1 Os06g0105800 [Oryza sativa Japonica Group] &gt;BAG99362.1 unnamed protein product [Oryza sativa Japonica Group] &gt;BAG99725.1 unnamed protein product [Oryza sativa Japonica Group] &gt;BAS95745.1 Os06g0105800 [Oryza sativa Japonica Group]
LOC_Os03g62100.1	MYB_related	1.40748	0.00345852	LOC107276546	LOC_Os03g62100	Os03g0837200	0.656823	1.17939	0.936395	2.33429	3.84643	2.73483	0.0109162	2.65274	up	NA	NA	2	NA	transcription factor MYBS1-like [Oryza sativa Japonica Group] &gt;AAO41136.1 putative myb-like protein [Oryza sativa Japonica Group] &gt;ABF99772.1 Myb-like DNA-binding domain containing protein [Oryza sativa Japonica Group] &gt;EAY92493.1 hypothetical protein OsI_14230 [Oryza sativa Indica Group]
LOC_Os01g34060.1	MYB_related	-1.38546	8.03e-07	LOC4323963	LOC_Os01g34060	Os01g0524500	21.6785	13.6232	21.6724	9.1699	8.41253	8.39869	9.82e-06	0.382767	down	NA	NA	11	NA	NA
LOC_Os05g10690.1	MYB_related	-1.33727	3.18e-08	LOC4338039	LOC_Os05g10690	Os05g0195700	12.3927	12.55	15.8364	5.71596	8.10697	5.39951	6.6e-07	0.395769	down	NA	NA	10	NA	transcription factor MYBS3-like [Oryza sativa Japonica Group] &gt;AAT38072.1 putative Myb-related transcription factor [Oryza sativa Japonica Group] &gt;EEE62638.1 hypothetical protein OsJ_17441 [Oryza sativa Japonica Group] &gt;KAF2929534.1 hypothetical protein DAI22_05g064100 [Oryza sativa Japonica Group] &gt;BAF16777.1 Os05g0195700 [Oryza sativa Japonica Group] &gt;BAG87919.1 unnamed protein p…
LOC_Os06g51260.1	MYB_related	-1.31421	6.7e-05	LOC4342135	LOC_Os06g51260	Os06g0728700	24.8855	17.8397	38.0859	9.9283	15.8247	12.8235	0.000403205	0.402146	down	NA	NA	8	NA	protein REVEILLE 1 isoform X1 [Oryza sativa Japonica Group] &gt;EEE66394.1 hypothetical protein OsJ_22733 [Oryza sativa Japonica Group] &gt;KAF2928608.1 hypothetical protein DAI22_06g291600 [Oryza sativa Japonica Group] &gt;BAD61826.1 putative MYB transcription factor [Oryza sativa Japonica Group] &gt;BAD62104.1 putative MYB transcription factor [Oryza sativa Japonica Group] &gt;BAF20559.1 Os06g0…
LOC_Os05g51160.1;LOC_Os05g51160.2	MYB_related	-1.29112	1.15e-05	LOC4339780	LOC_Os05g51160	Os05g0589400	31.1555	28.2719	25.0369	15.6602	15.7664	9.25073	9.17e-05	0.408634	down	NA	NA	11	NA	transcription factor MYBS3-like [Oryza sativa Japonica Group] &gt;XP_052155084.1 transcription factor MYBS3-like [Oryza glaberrima] &gt;KAB8100830.1 hypothetical protein EE612_031453 [Oryza sativa] &gt;AAT58809.1 putative myb transcription factor [Oryza sativa Japonica Group] &gt;ADX60223.1 MYB-related transcription factor, partial [Oryza sativa Japonica Group] &gt;KAB8100831.1 hypothetical prote…
LOC_Os01g43230.2;LOC_Os01g43230.3	MYB_related	-1.22485	0.00179128	LOC107278244	LOC_Os01g43230	Os01g0619900	69.5018	38.6456	46.4283	30.6313	33.2996	14.5074	0.00629366	0.427842	down	NA	NA	14	NA	MYB-like transcription factor ETC3 isoform X1 [Oryza sativa Japonica Group] &gt;XP_052156270.1 MYB-like transcription factor ETC3 [Oryza glaberrima]
LOC_Os03g60080.1	NAC	3.09387	1.43e-12	LOC4334553	LOC_Os03g60080	Os03g0815100	21.0368	6.97953	7.43477	91.5307	143.567	133.952	1.2e-10	8.53782	up	NA	NA	5	NA	NA
LOC_Os03g01870.1	NAC	-3.01429	3.43e-07	LOC4331342	LOC_Os03g01870	Os03g0109000	1.317	1.03413	1.81143	0.299457	0.16144	0.140174	4.85e-06	0.123768	down	NA	NA	8	NA	NAC transcription factor 32 [Oryza sativa Japonica Group] &gt;KAB8089820.1 hypothetical protein EE612_014837 [Oryza sativa] &gt;ABF93571.1 NAC-domain containing protein 21/22, putative, expressed [Oryza sativa Japonica Group] &gt;EAZ25307.1 hypothetical protein OsJ_09117 [Oryza sativa Japonica Group] &gt;KAF2936851.1 hypothetical protein DAI22_03g008700 [Oryza sativa Japonica Group] &gt;BAF10619.…
LOC_Os01g60020.1	NAC	1.72203	2.12e-07	LOC4327485	LOC_Os01g60020	Os01g0816100	1.49499	1.70885	2.90049	7.50483	7.9687	8.62531	3.22e-06	3.29899	up	NA	NA	5	NA	NA
LOC_Os05g34310.1	NAC	1.70588	0.0160877	LOC4338800	LOC_Os05g34310	Os05g0415400	0.103636	0.574866	0.281988	1.22474	1.58907	0.903048	0.0395607	3.26227	up	NA	NA	9	NA	NAC transcription factor 25 [Oryza sativa Japonica Group] &gt;AAT77373.1 unknown protein [Oryza sativa Japonica Group] &gt;AAV32133.1 unknown protein [Oryza sativa Japonica Group] &gt;EEE63736.1 hypothetical protein OsJ_18554 [Oryza sativa Japonica Group] &gt;KAF2930796.1 hypothetical protein DAI22_05g162200 [Oryza sativa Japonica Group] &gt;BAF17469.1 Os05g0415400 [Oryza sativa Japonica Group]
LOC_Os07g48550.1	NAC	-1.67542	5.21e-05	LOC4344324	LOC_Os07g48550	Os07g0684800	17.7676	10.2744	26.0675	7.66758	8.13895	4.28882	0.000327376	0.313075	down	NA	NA	8	NA	NAC domain-containing protein 87 [Oryza sativa Japonica Group] &gt;EAZ05179.1 hypothetical protein OsI_27374 [Oryza sativa Indica Group] &gt;KAB8106917.1 hypothetical protein EE612_041447 [Oryza sativa] &gt;AFK74447.1 NAC transcription factor 15 [Oryza sativa Japonica Group] &gt;KAB8106918.1 hypothetical protein EE612_041447 [Oryza sativa] &gt;KAF2924564.1 hypothetical protein DAI22_07g277200 [Or…
LOC_Os08g10080.1	NAC	-1.62575	0.000251077	LOC4344902	LOC_Os08g10080	Os08g0200600	13.2923	6.56581	5.89931	4.40318	3.18162	2.25868	0.00122422	0.324042	down	NA	NA	10	NA	NAC domain-containing protein 21/22 isoform X1 [Oryza sativa Japonica Group] &gt;KAB8107718.1 hypothetical protein EE612_042669 [Oryza sativa] &gt;KAF2918534.1 hypothetical protein DAI22_08g064300 [Oryza sativa Japonica Group] &gt;BAD03222.1 putative NAC domain protein NAC1 [Oryza sativa Japonica Group] &gt;BAD03589.1 putative NAC domain protein NAC1 [Oryza sativa Japonica Group] &gt;BAF23127.1 O…
LOC_Os06g51070.1	NAC	-1.58133	0.00971016	LOC4342116	LOC_Os06g51070	Os06g0726300	3.19282	0.917087	2.87464	1.22115	0.975584	0.560465	0.0259032	0.334175	down	NA	NA	12	NA	NAC domain-containing protein 22-like [Oryza sativa Japonica Group] &gt;XP_052159274.1 NAC domain-containing protein 22-like [Oryza glaberrima] &gt;EAZ02417.1 hypothetical protein OsI_24519 [Oryza sativa Indica Group] &gt;KAB8103957.1 hypothetical protein EE612_036565 [Oryza sativa] &gt;EAZ38339.1 hypothetical protein OsJ_22714 [Oryza sativa Japonica Group] &gt;KAF2928578.1 hypothetical protein D…
LOC_Os02g38130.1	NAC	1.57019	0.000458219	LOC4329852	LOC_Os02g38130	Os02g0594800	0.691957	0.87139	0.50177	1.3395	3.49854	2.5735	0.00200478	2.96944	up	NA	NA	2	NA	NAC domain-containing protein 73 [Oryza sativa Japonica Group] &gt;KAB8087768.1 hypothetical protein EE612_012178 [Oryza sativa] &gt;KAF2945628.1 hypothetical protein DAI22_02g230400 [Oryza sativa Japonica Group] &gt;BAD16820.1 no apical meristem (NAM)-like protein [Oryza sativa Japonica Group] &gt;BAF09222.1 Os02g0594800 [Oryza sativa Japonica Group] &gt;BAH00731.1 unnamed protein product [Oryza…
LOC_Os06g04090.1	NAC	-1.50858	1.23e-05	LOC4340011	LOC_Os06g04090	Os06g0131700	31.6458	19.208	26.8398	14.501	9.74623	7.87516	9.71e-05	0.351456	down	NA	NA	11	NA	NAC domain-containing protein 43 [Oryza sativa Japonica Group] &gt;XP_052160731.1 NAC domain-containing protein 43-like [Oryza glaberrima] &gt;EAY99525.1 hypothetical protein OsI_21494 [Oryza sativa Indica Group] &gt;AAO33144.1 putative NAM (no apical meristem) protein [Oryza sativa Japonica Group] &gt;KAF2925009.1 hypothetical protein DAI22_06g020800 [Oryza sativa Japonica Group] &gt;BAA84803.1 …
LOC_Os01g09550.1;LOC_Os01g09550.2;LOC_Os01g09550.3;LOC_Os01g09550.4	NAC	-1.468	2.03e-05	LOC4327298	LOC_Os01g09550	Os01g0191300	38.5123	21.9353	31.5158	17.5322	11.11	10.5109	0.00014861	0.361484	down	NA	NA	11	NA	NAC domain-containing protein 75 isoform X3 [Oryza sativa Japonica Group]
LOC_Os03g21060.1	NAC	-1.331	0.00670927	LOC4332717	LOC_Os03g21060	Os03g0327800	3.82967	2.25255	3.11171	1.58256	2.08892	0.661312	0.019069	0.397494	down	NA	NA	19	NA	NAC transcription factor 47 [Oryza sativa Japonica Group] &gt;Q8H7M1.1 RecName: Full=NAC domain-containing protein 58; Short=ONAC058; AltName: Full=Protein NAC-LIKE, ACTIVATED BY AP3/PI homolog; Short=OsNAP; AltName: Full=Protein PREMATURELY SENILE 1 [Oryza sativa Japonica Group] &gt;AAN64999.1 Putative NAM (no apical meristem) protein [Oryza sativa Japonica Group] &gt;ABF95729.1 NAC domain trans…
LOC_Os08g42400.1;LOC_Os08g42400.2;LOC_Os08g42400.3	NAC	-1.32081	9.29e-10	LOC4346157	LOC_Os08g42400	Os08g0535800	91.3807	86.6191	105.409	49.712	44.7557	39.5758	3.14e-08	0.400309	down	NA	NA	10	NA	NA
LOC_Os09g32260.1;LOC_Os09g32260.2	NAC	-1.28004	0.00465648	LOC4347465	LOC_Os09g32260	Os09g0497900	3.91055	2.62741	3.36113	1.39183	2.5347	0.897906	0.0140474	0.411785	down	NA	NA	11	NA	NAC domain-containing protein 92 [Oryza sativa Japonica Group] &gt;XP_015612625.1 NAC domain-containing protein 92 [Oryza sativa Japonica Group] &gt;KAB8111159.1 hypothetical protein EE612_048727 [Oryza sativa] &gt;EAZ45243.1 hypothetical protein OsJ_29886 [Oryza sativa Japonica Group] &gt;KAF2916871.1 hypothetical protein DAI22_09g152000 [Oryza sativa Japonica Group] &gt;KAF2916872.1 hypothetica…
LOC_Os05g48850.1	NAC	-1.22448	7.21e-06	LOC4339612	LOC_Os05g48850	Os05g0563000	29.8135	38.0813	31.9485	21.2459	15.4312	13.1958	6.23e-05	0.42795	down	NA	NA	11	NA	NAC domain-containing protein 73 [Oryza sativa Japonica Group] &gt;XP_052155319.1 NAC domain-containing protein 73-like [Oryza glaberrima] &gt;AAT77390.1 unknown protein [Oryza sativa Japonica Group] &gt;EEE64692.1 hypothetical protein OsJ_19547 [Oryza sativa Japonica Group] &gt;KAF2932108.1 hypothetical protein DAI22_05g262900 [Oryza sativa Japonica Group] &gt;BAF18237.1 Os05g0563000 [Oryza sati…
LOC_Os06g01230.1;LOC_Os06g01230.2	NAC	-1.18106	1.82e-05	LOC4339834	LOC_Os06g01230	Os06g0101800	6.5987	5.15566	7.4552	3.31609	3.92844	2.85333	0.000135221	0.441028	down	NA	NA	11	NA	NAC domain-containing protein 7 [Oryza sativa Japonica Group] &gt;KAF2924719.1 hypothetical protein DAI22_06g000600 [Oryza sativa Japonica Group]
LOC_Os09g33490.1	NAC	-1.17817	1.02e-05	LOC4347530	LOC_Os09g33490	Os09g0509100	33.2671	22.308	36.7994	15.4451	18.0905	15.2725	8.35e-05	0.441911	down	NA	NA	14	NA	NAC domain-containing protein 83 [Oryza sativa Japonica Group] &gt;EAZ45318.1 hypothetical protein OsJ_29961 [Oryza sativa Japonica Group] &gt;BAF25540.1 Os09g0509100 [Oryza sativa Japonica Group] &gt;BAG87473.1 unnamed protein product [Oryza sativa Japonica Group] &gt;BAT08890.1 Os09g0509100 [Oryza sativa Japonica Group]
LOC_Os09g38000.1	NAC	1.14216	0.000856238	LOC107276893	LOC_Os09g38000	Os09g0552800	0.675789	1.11029	1.10127	2.52203	2.34909	2.70675	0.00338975	2.20712	up	NA	NA	16	NA	NAC domain-containing protein 86 [Oryza sativa Japonica Group] &gt;KAB8111640.1 hypothetical protein EE612_049377 [Oryza sativa] &gt;KAF2917430.1 hypothetical protein DAI22_09g191400 [Oryza sativa Japonica Group] &gt;BAT09320.1 Os09g0552800 [Oryza sativa Japonica Group]
LOC_Os06g36480.1	NAC	-1.04865	3.9e-06	LOC9268992	LOC_Os06g36480	Os06g0560300	9.43353	7.88845	9.5015	5.43542	5.24036	4.69485	3.73e-05	0.483421	down	NA	NA	11	NA	NAC domain-containing protein 75 isoform X1 [Oryza sativa Japonica Group]
LOC_Os07g12340.1	NAC	1.01718	0.0036218	LOC4342753	LOC_Os07g12340	Os07g0225300	10.7314	5.70282	5.86824	13.657	17.35	23.6714	0.011339	2.02396	up	NA	NA	5	NA	NAC domain-containing protein 67 [Oryza sativa Japonica Group] &gt;XP_052160972.1 NAC domain-containing protein 67 [Oryza glaberrima] &gt;Q7EZT1.1 RecName: Full=NAC domain-containing protein 67; Short=ONAC067; AltName: Full=OsNAC3 [Oryza sativa Japonica Group] &gt;KAB8104814.1 hypothetical protein EE612_037977 [Oryza sativa] &gt;KAF2922014.1 hypothetical protein DAI22_07g078500 [Oryza sativa Japo…
LOC_Os07g06470.1;LOC_Os07g06470.2	NF-YA	-1.51252	0.000645826	LOC4342440	LOC_Os07g06470	Os07g0158500	6.73263	9.11025	7.91365	4.61639	3.56084	1.45437	0.00267134	0.350499	down	NA	K08064	8	NA	nuclear transcription factor Y subunit A-2 [Oryza sativa Japonica Group] &gt;KAF2921500.1 hypothetical protein DAI22_07g038400 [Oryza sativa Japonica Group]
LOC_Os12g41880.1;LOC_Os12g41880.2	NF-YA	-1.12032	6.11e-07	LOC4352778	LOC_Os12g41880	Os12g0613000	17.5722	14.3378	16.1926	8.77006	9.02396	7.84074	7.83e-06	0.459993	down	NA	K08064	11	NA	nuclear transcription factor Y subunit A-7 isoform X1 [Oryza sativa Japonica Group] &gt;XP_052137884.1 nuclear transcription factor Y subunit A-7 isoform X1 [Oryza glaberrima] &gt;ABA99388.2 CCAAT-box transcription factor complex WHAP5, putative, expressed [Oryza sativa Japonica Group] &gt;KAF2908805.1 hypothetical protein DAI22_12g209800 [Oryza sativa Japonica Group]
LOC_Os01g70880.1	NF-YB	5.27605	0.0211769	LOC107278457	LOC_Os01g70880	Os01g0935100	0	0	0	0.056188	0.039052	0.036831	0.0498508	38.748	up	NA	K08065	3	NA	nuclear transcription factor Y subunit B-4 [Oryza sativa Japonica Group] &gt;KAF2954185.1 hypothetical protein DAI22_01g462000 [Oryza sativa Japonica Group]
LOC_Os08g07740.1	NF-YB	-2.38388	9.79e-05	LOC4344784	LOC_Os08g07740	Os08g0174500	1.21459	0.784787	1.61359	0.372503	0.297921	0.134561	0.000555906	0.191594	down	NA	K08065	8	NA	nuclear transcription factor Y subunit B-11 [Oryza sativa Japonica Group] &gt;Q0J7P4.1 RecName: Full=Nuclear transcription factor Y subunit B-11; Short=OsNF-YB11; AltName: Full=Protein DAYS TO HEADING 8; AltName: Full=Protein HEADING DATE 5; AltName: Full=Transcriptional activator HAP3H; Short=OsHAP3H [Oryza sativa Japonica Group] &gt;KAB8107560.1 hypothetical protein EE612_042406 [Oryza sativa] …
LOC_Os01g70890.1	NF-YB	1.94544	0.00283588	LOC9266773	LOC_Os01g70890	Os01g0935200	0.636047	7.26525	2.01884	13.7888	15.4051	14.9947	0.00924982	3.85157	up	NA	K08065	2	NA	nuclear transcription factor Y subunit B-1 [Oryza sativa Japonica Group] &gt;XP_015635872.1 nuclear transcription factor Y subunit B-1 [Oryza sativa Japonica Group] &gt;KAB8085085.1 hypothetical protein EE612_007817 [Oryza sativa] &gt;EAZ14750.1 hypothetical protein OsJ_04677 [Oryza sativa Japonica Group] &gt;KAF2954189.1 hypothetical protein DAI22_01g462100 [Oryza sativa Japonica Group] &gt;BAB6…
LOC_Os09g39490.1	NF-YB	1.60544	0.00340458	LOC4347894	LOC_Os09g39490	Os09g0568200	1.47445	5.79533	1.37918	7.71755	9.23371	13.9811	0.0107677	3.04288	up	NA	K02326	20	NA	NA
LOC_Os07g41580.1	NF-YB	-1.3991	1.06e-05	LOC4343856	LOC_Os07g41580	Os07g0606600	8.15441	11.3537	13.54	5.94499	4.58406	4.14645	8.61e-05	0.379167	down	NA	K08065	17	NA	nuclear transcription factor Y subunit B-10 [Oryza sativa Japonica Group] &gt;Q69J40.1 RecName: Full=Nuclear transcription factor Y subunit B-10; Short=OsNF-YB10; AltName: Full=Transcriptional activator HAP3F; Short=OsHAP3F [Oryza sativa Japonica Group] &gt;EEC82417.1 hypothetical protein OsI_26805 [Oryza sativa Indica Group] &gt;KAB8106292.1 hypothetical protein EE612_040570 [Oryza sativa] &gt;K…
LOC_Os03g29970.1	NF-YB	-1.26256	0.000626478	LOC4333105	LOC_Os03g29970	Os03g0413000	24.0685	15.0305	22.2282	12.9872	11.093	6.04541	0.00260221	0.416804	down	NA	K08065	14	NA	NA
LOC_Os05g49780.1	NF-YB	1.24952	0.00176973	LOC4339676	LOC_Os05g49780	Os05g0573500	3.42679	10.8494	5.46746	17.9686	15.7249	21.1981	0.00623438	2.37763	up	NA	K08065	2	NA	nuclear transcription factor Y subunit B-4 [Oryza sativa Japonica Group] &gt;Q65XK1.2 RecName: Full=Nuclear transcription factor Y subunit B-4; AltName: Full=OsNF-YB-4; AltName: Full=Transcriptional activator HAP3C [Oryza sativa Japonica Group] &gt;KAB8100682.1 hypothetical protein EE612_031264 [Oryza sativa] &gt;KAF2932217.1 hypothetical protein DAI22_05g271400 [Oryza sativa Japonica Group] &gt;…
LOC_Os01g08790.1	NF-YC	2.91772	2.42e-05	LOC4325336	LOC_Os01g08790	Os01g0183400	0.191025	1.15423	0.257451	3.89769	2.99746	7.43759	0.00017158	7.55653	up	NA	NA	20	NA	tropomyosin [Oryza sativa Japonica Group] &gt;KAF2948783.1 hypothetical protein DAI22_01g059900 [Oryza sativa Japonica Group] &gt;BAD67789.1 hypothetical protein [Oryza sativa Japonica Group] &gt;BAF04140.1 Os01g0183400 [Oryza sativa Japonica Group] &gt;BAS70751.1 Os01g0183400 [Oryza sativa Japonica Group]
LOC_Os03g14669.1;LOC_Os03g14669.2	NF-YC	-1.88638	9.38e-06	LOC9266204	LOC_Os03g14669	Os03g0251350	123.134	45.6626	77.5084	32.4506	29.0098	15.3318	7.75e-05	0.270485	down	NA	K08066	14	NA	nuclear transcription factor Y subunit C-2 [Oryza sativa Japonica Group] &gt;XP_015628320.1 nuclear transcription factor Y subunit C-2 [Oryza sativa Japonica Group] &gt;A6BLW4.1 RecName: Full=Nuclear transcription factor Y subunit C-2; Short=OsNF-YC2; AltName: Full=Transcriptional activator HAP5C; Short=OsHAP5C [Oryza sativa Japonica Group] &gt;KAB8091105.1 hypothetical protein EE612_016528 [Oryz…
LOC_Os09g37710.1;LOC_Os09g37710.2	Nin-like	-1.36086	3.28e-13	LOC9268032	LOC_Os09g37710	Os09g0549450	13.7955	14.158	15.355	6.61119	7.382	5.97926	3.39e-11	0.38935	down	NA	NA	8	NA	protein NLP1-like isoform X1 [Oryza sativa Japonica Group] &gt;KAF2917403.1 hypothetical protein DAI22_09g188700 [Oryza sativa Japonica Group]
LOC_Os04g47640.1	Nin-like	1.14315	0.000101056	LOC4336672	LOC_Os04g47640	Os04g0564000	1.73206	2.54342	2.17057	4.00415	6.08792	7.05643	0.000570548	2.20862	up	NA	NA	9	NA	protein RKD5 isoform X1 [Oryza sativa Japonica Group] &gt;XP_052151638.1 protein RKD5 isoform X1 [Oryza glaberrima] &gt;CAH66748.1 H0409D10.6 [Oryza sativa] &gt;KAF2935365.1 hypothetical protein DAI22_04g226700 [Oryza sativa Japonica Group] &gt;CAE03088.2 OSJNBa0017B10.3 [Oryza sativa Japonica Group] &gt;BAF15480.2 Os04g0564000 [Oryza sativa Japonica Group]
LOC_Os06g12360.1	Nin-like	1.00077	0.00270292	LOC107276991	LOC_Os06g12360	Os06g0228900	0.909246	1.00491	0.593893	1.62801	2.08522	2.12636	0.00888349	2.00107	up	NA	NA	20	NA	protein RKD1 isoform X2 [Oryza sativa Japonica Group] &gt;KAB8101830.1 hypothetical protein EE612_032861 [Oryza sativa] &gt;BAS96893.1 Os06g0228950 [Oryza sativa Japonica Group]
LOC_Os04g33440.2	S1Fa-like	-1.05759	5.86e-06	LOC4335761	LOC_Os04g33440	Os04g0408700	140.964	131.081	130.326	89.3463	75.2184	63.1651	5.24e-05	0.480435	down	NA	NA	14	NA	DNA-binding protein S1FA2 [Oryza sativa Japonica Group] &gt;XP_052151170.1 DNA-binding protein S1FA2 [Oryza glaberrima] &gt;XP_052151171.1 DNA-binding protein S1FA2 [Oryza glaberrima] &gt;Q7XLX6.2 RecName: Full=DNA-binding protein S1FA2 [Oryza sativa Japonica Group] &gt;EAY94010.1 hypothetical protein OsI_15787 [Oryza sativa Indica Group] &gt;CAH66497.1 H0321H01.6 [Oryza sativa] &gt;EAZ30652.1 hy…
LOC_Os09g31438.1	SBP	1.55657	3.33e-05	LOC9266075	LOC_Os09g31438	Os09g0491532	0.895877	2.45809	1.41098	4.4455	5.65505	6.52241	0.000224539	2.94153	up	NA	NA	20	NA	NA
LOC_Os08g39890.1	SBP	1.37252	0.00100409	LOC4345998	LOC_Os08g39890	Os08g0509600	1.5012	5.40847	4.18491	9.04647	13.1681	11.6934	0.00386155	2.58922	up	NA	NA	2	NA	squamosa promoter-binding-like protein 14 isoform X1 [Oryza sativa Japonica Group]
LOC_Os02g07780.1;LOC_Os02g07780.2	SBP	-1.10954	8.25e-07	LOC4328461	LOC_Os02g07780	Os02g0174100	18.9111	25.9405	22.7099	13.8732	11.2517	11.88	1e-05	0.463443	down	NA	NA	8	NA	squamosa promoter-binding-like protein 4 isoform X1 [Oryza sativa Japonica Group]
LOC_Os08g41940.1	SBP	1.09592	0.0135166	LOC4346133	LOC_Os08g41940	Os08g0531600	0.480009	1.61129	1.17973	2.95778	2.36519	2.85339	0.0341415	2.13749	up	NA	NA	20	NA	squamosa promoter-binding-like protein 16 [Oryza sativa Japonica Group] &gt;Q6YZE8.1 RecName: Full=Squamosa promoter-binding-like protein 16 [Oryza sativa Japonica Group] &gt;AFZ76553.1 squamosa promoter binding protein-like 16 [Oryza sativa Indica Group] &gt;KAB8109323.1 hypothetical protein EE612_045551 [Oryza sativa] &gt;KAF2920651.1 hypothetical protein DAI22_08g225400 [Oryza sativa Japonica …
LOC_Os06g49830.1	SRS	5.27428	0.000263283	LOC4342046	LOC_Os06g49830	Os06g0712600	0	0	0.032164	0.082113	1.24157	0.396034	0.00127257	38.7006	up	NA	NA	16	NA	protein SHI RELATED SEQUENCE 1 [Oryza sativa Japonica Group] &gt;XP_025881792.1 protein SHI RELATED SEQUENCE 1 [Oryza sativa Japonica Group] &gt;XP_052157798.1 protein SHORT INTERNODES 1-like [Oryza glaberrima] &gt;KAF2928456.1 hypothetical protein DAI22_06g280000 [Oryza sativa Japonica Group]
LOC_Os01g72490.1;LOC_Os01g72490.2	SRS	1.12409	2.5e-05	LOC4325404	LOC_Os01g72490	Os01g0954500	1.91939	1.95513	1.60415	3.50282	5.37533	5.46159	0.000175954	2.17964	up	NA	NA	16	NA	protein LATERAL ROOT PRIMORDIUM 1 [Oryza sativa Japonica Group] &gt;KAF2954359.1 hypothetical protein DAI22_01g476000 [Oryza sativa Japonica Group] &gt;BAB64713.1 putative LRP1 [Oryza sativa Japonica Group] &gt;BAB90775.1 putative LRP1 [Oryza sativa Japonica Group] &gt;BAF07347.1 Os01g0954500 [Oryza sativa Japonica Group] &gt;BAG95557.1 unnamed protein product [Oryza sativa Japonica Group]
LOC_Os03g51690.3;LOC_Os03g51690.1;LOC_Os03g51690.2	TALE	10.1578	1.14e-14	LOC4333973	LOC_Os03g51690	Os03g0727000	0	0	0	1.28896	3.32264	1.27151	1.9e-12	1142.38	up	NA	NA	16	NA	NA
LOC_Os07g03770.1	TALE	4.90459	4.08e-05	LOC4342320	LOC_Os07g03770	Os07g0129700	0	0	0.130298	0.924218	3.04702	0.828265	0.000266704	29.9523	up	NA	NA	2	NA	NA
LOC_Os01g19694.1	TALE	4.10942	0.00211372	LOC4325788	LOC_Os01g19694	Os01g0302500	0	0.142846	0	0.336034	1.7315	0.807059	0.00721803	17.2608	up	NA	NA	16	NA	NA
LOC_Os05g03884.1	TALE	3.74535	7.12e-05	LOC4337701	LOC_Os05g03884	Os05g0129700	0.18621	0.037722	0.038801	0.203169	2.478	1.92029	0.00042474	13.4111	up	NA	NA	7	NA	homeobox protein knotted-1-like 10 [Oryza sativa Japonica Group] &gt;XP_052155920.1 homeobox protein knotted-1-like 10 [Oryza glaberrima] &gt;A2Y007.2 RecName: Full=Homeobox protein knotted-1-like 10; AltName: Full=Homeobox protein HOS9; AltName: Full=Homeobox protein OSH71; AltName: Full=Homeobox protein knotted-1-like 2; Short=Oskn2 [Oryza sativa Indica Group] &gt;Q7GDL5.1 RecName: Full=Homeobo…
LOC_Os06g01934.1	TALE	-3.67626	6.59e-12	LOC4339876	LOC_Os06g01934	Os06g0108900	63.4368	64.2926	77.417	12.1255	2.38984	3.75124	4.67e-10	0.0782229	down	NA	NA	10	NA	NA
LOC_Os03g03260.1	TALE	-2.86693	1.2e-19	LOC4331452	LOC_Os03g03260	Os03g0124000	26.0639	29.3513	34.4231	6.66853	3.93636	3.73706	7.8e-17	0.137078	down	NA	NA	10	NA	homeobox protein BEL1 homolog [Oryza sativa Japonica Group] &gt;KAB8089968.1 hypothetical protein EE612_015016 [Oryza sativa] &gt;ABF93732.1 Associated with HOX family protein, expressed [Oryza sativa Japonica Group] &gt;KAF2937025.1 hypothetical protein DAI22_03g020500 [Oryza sativa Japonica Group] &gt;KAF2937026.1 hypothetical protein DAI22_03g020500 [Oryza sativa Japonica Group] &gt;BAF10722.1…
LOC_Os06g43860.4;LOC_Os06g43860.2;LOC_Os06g43860.1	TALE	-2.4185	4.44e-10	LOC4341661	LOC_Os06g43860	Os06g0646600	441.378	313.971	358.706	123.685	72.3881	46.7774	1.69e-08	0.18705	down	GO:0003677;GO:0003700;GO:0005634;GO:0006355	NA	10	DNA binding; DNA-binding transcription factor activity; nucleus; regulation of transcription, DNA-templated	NA
LOC_Os10g39030.1	TALE	-2.19696	3.74e-13	LOC4349233	LOC_Os10g39030	Os10g0534900	37.4328	43.4366	51.0975	15.162	8.75498	9.6619	3.78e-11	0.218097	down	NA	NA	10	NA	BEL1-like homeodomain protein 4 [Oryza sativa Japonica Group] &gt;KAB8113465.1 hypothetical protein EE612_052468 [Oryza sativa] &gt;AAM88627.1 putative homeodomain protein [Oryza sativa Japonica Group] &gt;AAP54799.1 Associated with HOX family protein, expressed [Oryza sativa Japonica Group] &gt;KAF2914562.1 hypothetical protein DAI22_10g172600 [Oryza sativa Japonica Group] &gt;BAF27078.1 Os10g05…
LOC_Os08g19650.2;LOC_Os08g19650.1	TALE	-1.97004	3.71e-10	LOC4345191	LOC_Os08g19650	Os08g0292900	92.7028	58.5026	81.8754	27.542	26.451	16.4833	1.44e-08	0.255245	down	NA	NA	10	NA	LOW QUALITY PROTEIN: homeobox protein knotted-1-like 13 [Oryza sativa Japonica Group]
LOC_Os02g13310.1	TALE	1.7644	0.00558434	LOC4328784	LOC_Os02g13310	Os02g0226600	0.54538	5.41617	1.46556	6.48668	9.87787	13.0785	0.0163314	3.39732	up	NA	NA	2	NA	homeobox protein ATH1 isoform X2 [Oryza sativa Japonica Group] &gt;XP_025878539.1 homeobox protein ATH1 isoform X2 [Oryza sativa Japonica Group] &gt;EEE56592.1 hypothetical protein OsJ_05952 [Oryza sativa Japonica Group] &gt;KAF2943855.1 hypothetical protein DAI22_02g096300 [Oryza sativa Japonica Group] &gt;BAD25657.1 putative homeobox protein [Oryza sativa Japonica Group] &gt;BAF08260.1 Os02g022…
LOC_Os06g36680.1	TALE	1.66644	2.48e-05	LOC4341309	LOC_Os06g36680	Os06g0562300	0.573442	1.47309	0.8023	2.53408	4.86994	2.9146	0.000174798	3.1743	up	NA	NA	16	NA	BEL1-like homeodomain protein 1 isoform X1 [Oryza sativa Japonica Group] &gt;XP_015641754.1 BEL1-like homeodomain protein 1 isoform X1 [Oryza sativa Japonica Group] &gt;XP_025882414.1 BEL1-like homeodomain protein 1 isoform X1 [Oryza sativa Japonica Group] &gt;KAB8102815.1 hypothetical protein EE612_034826 [Oryza sativa] &gt;KAF2927208.1 hypothetical protein DAI22_06g187700 [Oryza sativa Japonica…
LOC_Os12g43950.1;LOC_Os12g43950.2;LOC_Os12g43950.3;LOC_Os12g43950.4	TALE	-1.57769	3.05e-11	LOC4352890	LOC_Os12g43950	Os12g0636200	112.947	104.137	71.883	40.1288	39.317	37.7957	1.71e-09	0.335018	down	NA	NA	10	NA	BEL1-like homeodomain protein 7 [Oryza sativa Japonica Group] &gt;XP_015619823.1 BEL1-like homeodomain protein 7 [Oryza sativa Japonica Group] &gt;XP_025878002.1 BEL1-like homeodomain protein 7 [Oryza sativa Japonica Group] &gt;KAB8118355.1 hypothetical protein EE612_061139 [Oryza sativa] &gt;ABA99971.1 Associated with HOX family protein, expressed [Oryza sativa Japonica Group] &gt;EAZ21338.1 hyp…
LOC_Os11g06020.1	TALE	-1.57146	8.13e-10	LOC4349837	LOC_Os11g06020	Os11g0158600	37.5566	28.3522	41.528	14.2821	16.3777	11.4071	2.81e-08	0.336467	down	NA	NA	11	NA	BEL1-like homeodomain protein 1 [Oryza sativa Japonica Group] &gt;XP_015616923.1 BEL1-like homeodomain protein 1 [Oryza sativa Japonica Group] &gt;XP_015616924.1 BEL1-like homeodomain protein 1 [Oryza sativa Japonica Group] &gt;XP_015616925.1 BEL1-like homeodomain protein 1 [Oryza sativa Japonica Group] &gt;EEC67717.1 hypothetical protein OsI_35198 [Oryza sativa Indica Group] &gt;ABA91569.1 Assoc…
LOC_Os03g52239.1;LOC_Os03g52239.2;LOC_Os03g52239.3	TALE	-1.48498	2.26e-10	LOC9266975	LOC_Os03g52239	Os03g0732100	69.904	72.2107	85.6266	37.7052	30.5576	27.4718	9.44e-09	0.357255	down	NA	NA	10	NA	NA
LOC_Os03g06930.1	TALE	-1.30421	1.08e-09	LOC4331729	LOC_Os03g06930	Os03g0165300	82.2187	89.7545	100.203	45.3328	49.3334	35.6634	3.55e-08	0.404942	down	NA	NA	11	NA	NA
LOC_Os05g38120.1	TALE	-1.16364	5.79e-07	LOC4338977	LOC_Os05g38120	Os05g0455200	13.1217	17.2768	15.462	9.13142	8.16106	6.73977	7.49e-06	0.446384	down	NA	NA	11	NA	NA
LOC_Os02g51280.1	TCP	2.06049	1.77e-07	LOC4330722	LOC_Os02g51280	Os02g0747400	1.77558	6.43195	4.43442	17.2267	22.8323	21.9395	2.77e-06	4.17128	up	NA	K16221	9	NA	transcription factor TCP14 [Oryza sativa Japonica Group] &gt;KAB8088908.1 hypothetical protein EE612_013682 [Oryza sativa] &gt;ADE62742.1 TCP transcription factor [Oryza sativa Japonica Group] &gt;KAF2946948.1 hypothetical protein DAI22_02g332600 [Oryza sativa Japonica Group] &gt;BAD16334.1 putative TCP-domain protein [Oryza sativa Japonica Group] &gt;BAD16444.1 putative TCP-domain protein [Oryza…
LOC_Os02g42380.1	TCP	1.81407	1.75e-05	LOC4330080	LOC_Os02g42380	Os02g0635800	3.22454	12.8183	6.18727	26.0482	32.7036	32.7989	0.000130497	3.51634	up	NA	K16221	2	NA	transcription factor TCP7 [Oryza sativa Japonica Group] &gt;KAB8088099.1 hypothetical protein EE612_012587 [Oryza sativa] &gt;KAF2946021.1 hypothetical protein DAI22_02g260500 [Oryza sativa Japonica Group] &gt;BAD25071.1 TCP family transcription factor-like [Oryza sativa Japonica Group] &gt;BAF09435.1 Os02g0635800 [Oryza sativa Japonica Group] &gt;BAG88012.1 unnamed protein product [Oryza sativa …
LOC_Os04g44440.1	TCP	1.78878	0.00155813	LOC4336452	LOC_Os04g44440	Os04g0526000	0.60532	3.37824	1.19875	7.65416	5.40317	7.64335	0.00560518	3.45523	up	NA	K16221	2	NA	transcription factor TCP21 [Oryza sativa Japonica Group] &gt;KAF2935014.1 hypothetical protein DAI22_04g202100 [Oryza sativa Japonica Group] &gt;BAF15275.1 Os04g0526000 [Oryza sativa Japonica Group] &gt;BAS90167.1 Os04g0526000 [Oryza sativa Japonica Group] &gt;CAE05645.2 OSJNBa0038O10.11 [Oryza sativa Japonica Group]
LOC_Os11g07460.1	TCP	1.68457	7.76e-06	LOC4349919	LOC_Os11g07460	Os11g0175700	1.95347	5.17049	2.60428	8.37158	15.0083	13.6768	6.6e-05	3.21446	up	NA	K16221	2	NA	NA
LOC_Os01g11550.1	TCP	1.54186	0.00115599	LOC4325252	LOC_Os01g11550	Os01g0213800	8.73457	46.6232	21.1031	72.408	74.9977	112.55	0.00434168	2.91171	up	NA	NA	20	NA	NA
LOC_Os03g57190.1	TCP	1.30531	0.000103652	LOC4334346	LOC_Os03g57190	Os03g0785800	3.90927	10.4884	6.52631	16.7051	20.7763	23.4962	0.000581756	2.47137	up	NA	NA	9	NA	transcription factor PCF6 [Oryza sativa Japonica Group] &gt;Q10CE8.1 RecName: Full=Transcription factor PCF6 [Oryza sativa Japonica Group] &gt;ABF99227.1 TCP family transcription factor containing protein, expressed [Oryza sativa Japonica Group] &gt;KAF2941699.1 hypothetical protein DAI22_03g365600 [Oryza sativa Japonica Group] &gt;BAH01343.1 unnamed protein product [Oryza sativa Japonica Group] …
LOC_Os06g12230.1	TCP	1.2367	0.00319424	LOC4340553	LOC_Os06g12230	Os06g0226700	2.32288	8.80252	6.08159	12.8908	14.6301	20.2428	0.0101979	2.35658	up	GO:0005739	K16221	9	mitochondrion	transcription factor TCP15 [Oryza sativa Japonica Group] &gt;EAZ00231.1 hypothetical protein OsI_22238 [Oryza sativa Indica Group] &gt;KAB8101815.1 hypothetical protein EE612_032832 [Oryza sativa] &gt;KAF2925908.1 hypothetical protein DAI22_06g087600 [Oryza sativa Japonica Group] &gt;BAD37305.1 putative auxin-induced basic helix-loop-helix transcription [Oryza sativa Japonica Group] &gt;BAD37456.…
LOC_Os12g07480.1	TCP	1.05808	2.39e-06	LOC9271589	LOC_Os12g07480	Os12g0173300	4.38137	5.2653	3.77391	9.10132	11.0107	13.1851	2.48e-05	2.08216	up	NA	K16221	9	NA	NA
LOC_Os04g57530.1	Trihelix	5.29347	7.59e-05	LOC9266435	LOC_Os04g57530	Os04g0670900	0	0.042931	0	0.149828	1.11631	0.762861	0.000447835	39.2186	up	GO:0009536	NA	16	plastid	NA
LOC_Os01g21590.1	Trihelix	3.34625	6.87e-09	LOC4327270	LOC_Os01g21590	Os01g0318400	0.93796	1.23765	0.696358	2.5382	11.8295	21.4598	1.78e-07	10.17	up	NA	NA	20	NA	NA
LOC_Os04g32590.1	Trihelix	-1.68133	2.93e-07	LOC4335704	LOC_Os04g32590	Os04g0397500	38.8321	22.4552	36.4462	15.0012	11.1777	9.85917	4.21e-06	0.311794	down	NA	NA	14	NA	trihelix transcription factor ASR3 [Oryza sativa Japonica Group] &gt;BAF14581.2 Os04g0397500 [Oryza sativa Japonica Group] &gt;CAE05151.2 OSJNBa0039C07.7 [Oryza sativa Japonica Group]
LOC_Os04g45750.1;LOC_Os04g45750.2	Trihelix	1.01115	1.52e-05	LOC4336540	LOC_Os04g45750	Os04g0541100	22.2295	40.266	32.6944	74.9347	77.3485	73.3914	0.000116589	2.01552	up	NA	NA	9	NA	trihelix transcription factor GTL1 isoform X2 [Oryza sativa Japonica Group] &gt;EEC77725.1 hypothetical protein OsI_16822 [Oryza sativa Indica Group] &gt;KAF2935137.1 hypothetical protein DAI22_04g211200 [Oryza sativa Japonica Group] &gt;CAE02791.2 OSJNBa0011L07.15 [Oryza sativa Japonica Group] &gt;CAH67396.1 H0115B09.8 [Oryza sativa]
LOC_Os05g48990.1	WOX	6.31285	0.00121477	LOC9266766	LOC_Os05g48990	Os05g0564500	0	0	0	0.054132	0.091174	0.280774	0.00451807	79.4982	up	NA	NA	7	NA	WUSCHEL-related homeobox 12 [Oryza sativa Japonica Group] &gt;A3B6V0.2 RecName: Full=WUSCHEL-related homeobox 12; AltName: Full=OsWOX12; AltName: Full=Protein WOX9C [Oryza sativa Japonica Group] &gt;EEC79703.1 hypothetical protein OsI_20994 [Oryza sativa Indica Group] &gt;EEE64703.1 hypothetical protein OsJ_19558 [Oryza sativa Japonica Group]
LOC_Os06g44010.1	WRKY	3.64053	0.000170675	LOC4341678	LOC_Os06g44010	Os06g0649000	0.371654	0	0.239774	5.14023	1.8094	2.13835	0.000884584	12.4712	up	NA	NA	1	NA	WRKY transcription factor WRKY28-like [Oryza sativa Japonica Group]
LOC_Os01g60600.1	WRKY	2.91518	1.61e-11	LOC9268836	LOC_Os01g60600	Os01g0821300	0.580734	0.731065	0.647522	8.81441	4.05614	4.38934	9.82e-10	7.54324	up	NA	NA	5	NA	probable WRKY transcription factor 4 [Oryza sativa Japonica Group] &gt;KAF2953040.1 hypothetical protein DAI22_01g380700 [Oryza sativa Japonica Group] &gt;BAB85299.1 WRKY transcription factor 64-like protein [Oryza sativa Japonica Group] &gt;BAB86480.1 WRKY transcription factor 64-like protein [Oryza sativa Japonica Group] &gt;BAH91359.1 Os01g0821300 [Oryza sativa Japonica Group]
LOC_Os05g04640.1	WRKY	-2.50904	3.81e-07	LOC107276141	LOC_Os05g04640	Os05g0137500	8.22892	2.76577	6.2174	1.4417	1.42593	0.72491	5.28e-06	0.175672	down	NA	NA	11	NA	NA
LOC_Os01g62514.1	WRKY	-2.36044	0.00175475	LOC107276405	LOC_Os01g62514	Os01g0842801	1.0295	0.656732	1.62523	0.455561	0.191561	0.094277	0.00619144	0.194732	down	NA	NA	11	NA	WRKY transcription factor WRKY28 [Oryza sativa Japonica Group] &gt;KAF2953261.1 hypothetical protein DAI22_01g396000 [Oryza sativa Japonica Group]
LOC_Os05g03900.1;LOC_Os05g03900.2	WRKY	-2.27009	8.71e-07	LOC9270274	LOC_Os05g03900	Os05g0129800	13.4006	4.90308	9.99925	2.98209	1.95631	2.0171	1.05e-05	0.207317	down	NA	NA	8	NA	probable WRKY transcription factor 69 [Oryza sativa Japonica Group] &gt;XP_052157367.1 probable WRKY transcription factor 69 [Oryza glaberrima] &gt;EEE62209.1 hypothetical protein OsJ_16996 [Oryza sativa Japonica Group] &gt;KAF2928974.1 hypothetical protein DAI22_05g022400 [Oryza sativa Japonica Group] &gt;KAF2928975.1 hypothetical protein DAI22_05g022400 [Oryza sativa Japonica Group]
LOC_Os08g09840.1	WRKY	-2.2565	1.47e-05	LOC107277882	LOC_Os08g09840	Os08g0198400	3.02416	1.20954	2.20008	0.583843	1.02422	0.276367	0.000113454	0.209279	down	NA	NA	11	NA	zinc finger BED domain-containing protein RICESLEEPER 2-like isoform X1 [Oryza sativa Japonica Group] &gt;XP_015649909.1 zinc finger BED domain-containing protein RICESLEEPER 2-like isoform X1 [Oryza sativa Japonica Group] &gt;XP_015649910.1 zinc finger BED domain-containing protein RICESLEEPER 2-like isoform X1 [Oryza sativa Japonica Group] &gt;XP_015649911.1 zinc finger BED domain-containing pr…
LOC_Os01g18584.1	WRKY	-2.23451	1.99e-05	LOC9272222	LOC_Os01g18584	Os01g0289600	8.75687	5.91834	8.79947	3.28477	1.75993	0.728638	0.000146148	0.212494	down	NA	NA	11	NA	NA
LOC_Os02g08440.1;LOC_Os02g08440.2;LOC_Os02g08440.3;LOC_Os02g08440.4	WRKY	2.23359	1.31e-05	LOC4328512	LOC_Os02g08440	Os02g0181300	14.4192	3.11513	4.59663	43.3336	43.6205	38.9957	0.000102761	4.70303	up	GO:0003700;GO:0005634;GO:0006355;GO:0006952;GO:0009685;GO:0043565	NA	5	DNA-binding transcription factor activity; nucleus; regulation of transcription, DNA-templated; defense response; gibberellin metabolic process; sequence-specific DNA binding	NA
LOC_Os07g48260.1	WRKY	1.88582	4.39e-05	LOC4344296	LOC_Os07g48260	Os07g0680400	0.614215	1.30273	0.527185	2.00067	4.02426	5.80634	0.000282662	3.69562	up	NA	NA	16	NA	probable WRKY transcription factor 70 [Oryza sativa Japonica Group] &gt;XP_015646873.1 probable WRKY transcription factor 70 [Oryza sativa Japonica Group] &gt;KAB8106877.1 hypothetical protein EE612_041396 [Oryza sativa] &gt;ADX60260.1 WRKY transcription factor, partial [Oryza sativa Japonica Group] &gt;KAF2924526.1 hypothetical protein DAI22_07g274800 [Oryza sativa Japonica Group] &gt;KAF2924529…
LOC_Os01g47560.1	WRKY	-1.75798	3.11e-11	LOC4326856	LOC_Os01g47560	Os01g0665750	13.8254	11.841	13.8243	5.52555	3.91889	4.30996	1.74e-09	0.295662	down	GO:0005739	NA	11	mitochondrion	uncharacterized protein LOC4326856 isoform X1 [Oryza sativa Japonica Group] &gt;BAF05711.1 Os01g0665500 [Oryza sativa Japonica Group]
LOC_Os06g05380.1	WRKY	-1.63238	1.35e-06	LOC107276380	LOC_Os06g05380	Os06g0146250	3.11444	2.36425	2.30569	1.19722	0.927294	0.842454	1.51e-05	0.322555	down	NA	NA	10	NA	probable WRKY transcription factor 72 isoform X1 [Oryza sativa Japonica Group] &gt;KAF2925171.1 hypothetical protein DAI22_06g032800 [Oryza sativa Japonica Group] &gt;KAF2925173.1 hypothetical protein DAI22_06g032800 [Oryza sativa Japonica Group]
LOC_Os12g01180.1	WRKY	-1.58671	4.97e-07	LOC4351243	LOC_Os12g01180	Os12g0102300	10.0825	5.4733	8.75112	3.14593	3.28025	3.25337	6.58e-06	0.332929	down	NA	K08597	11	NA	NA
LOC_Os05g49620.1	WRKY	1.47114	0.00308403	LOC4339665	LOC_Os05g49620	Os05g0571200	0.860707	2.91218	2.68237	9.17319	5.7001	5.83122	0.00991013	2.77242	up	NA	NA	5	NA	probable WRKY transcription factor 41 [Oryza sativa Japonica Group] &gt;Q0DFT7.1 RecName: Full=Transcription factor WRKY19; Short=OsWRKY19; AltName: Full=WRKY transcription factor 19 [Oryza sativa Japonica Group] &gt;ADX60272.1 bHLH transcription factor, partial [Oryza sativa Japonica Group] &gt;EEE64756.1 hypothetical protein OsJ_19612 [Oryza sativa Japonica Group] &gt;KAF2932202.1 hypothetical …
LOC_Os04g39570.1;LOC_Os04g39570.2	WRKY	1.29449	9.18e-05	LOC4336126	LOC_Os04g39570	Os04g0471700	0.646149	1.44318	1.11176	2.78393	2.91642	3.92636	0.000526224	2.4529	up	NA	K18835	2	NA	probable WRKY transcription factor 2 isoform X2 [Oryza sativa Japonica Group] &gt;AAQ20902.1 WRKY2 [Oryza sativa Japonica Group] &gt;BAF14971.1 Os04g0471700 [Oryza sativa Japonica Group] &gt;BAS89651.1 Os04g0471700 [Oryza sativa Japonica Group]
LOC_Os11g45920.1	WRKY	-1.21793	0.000123546	LOC107277465	LOC_Os11g45920	Os11g0686250	2.33851	1.67554	2.79048	1.0083	1.45817	1.04017	0.00067233	0.429899	down	NA	NA	12	NA	disease resistance protein RGA5-like isoform X1 [Oryza sativa Japonica Group]
LOC_Os02g43560.1	WRKY	1.17003	0.00644846	LOC4330173	LOC_Os02g43560	Os02g0652100	0.951384	2.93307	1.87569	4.40852	4.54734	6.30775	0.0184456	2.25016	up	NA	NA	2	NA	probable WRKY transcription factor 12 [Oryza sativa Japonica Group]
LOC_Os11g02480.1;LOC_Os11g02480.2	WRKY	-1.02623	0.00625914	LOC4349610	LOC_Os11g02480	Os11g0116900	3.52049	2.65879	3.80325	2.24121	2.05023	1.50335	0.0179776	0.49099	down	GO:0009536	NA	11	plastid	NA
LOC_Os05g27730.1	WRKY	1.01316	0.0196675	LOC4338474	LOC_Os05g27730	Os05g0343400	28.8514	8.24089	13.4317	38.3751	48.0462	37.042	0.0468602	2.01832	up	NA	K13424	5	NA	WRKY transcription factor WRKY24 isoform X1 [Oryza sativa Japonica Group]
LOC_Os02g42950.1;LOC_Os02g42950.2	YABBY	3.4517	0.00947508	LOC4330130	LOC_Os02g42950	Os02g0643200	0.051139	1.40183	0.042447	3.60369	7.48353	8.15344	0.0253852	10.9412	up	NA	K25796	16	NA	NA
LOC_Os01g44430.1	ZF-HD	-2.67968	4.74e-07	LOC9268901	LOC_Os01g44430	Os01g0635550	8.68713	3.68789	5.67136	1.3674	1.52058	0.451771	6.34e-06	0.156076	down	NA	NA	10	NA	zinc-finger homeodomain protein 5 [Oryza sativa Japonica Group] &gt;XP_015622497.1 zinc-finger homeodomain protein 5 [Oryza sativa Japonica Group] &gt;Q5VM82.1 RecName: Full=Zinc-finger homeodomain protein 5; Short=OsZHD5 [Oryza sativa Japonica Group] &gt;KAB8082612.1 hypothetical protein EE612_004556 [Oryza sativa] &gt;KAF2951337.1 hypothetical protein DAI22_01g254700 [Oryza sativa Japonica Grou…
LOC_Os08g37400.1	ZF-HD	2.50726	0.00025689	LOC4345845	LOC_Os08g37400	Os08g0479400	0.263872	3.59389	0.817214	7.81229	11.3418	11.7288	0.00124686	5.68541	up	NA	NA	2	NA	zinc-finger homeodomain protein 2 [Oryza sativa Japonica Group] &gt;A2YWA6.1 RecName: Full=Zinc-finger homeodomain protein 2 [Oryza sativa Indica Group] &gt;Q6ZB90.1 RecName: Full=Zinc-finger homeodomain protein 2; Short=OsZHD2 [Oryza sativa Japonica Group] &gt;KAB8108891.1 hypothetical protein EE612_044928 [Oryza sativa] &gt;EAZ07367.1 hypothetical protein OsI_29618 [Oryza sativa Indica Group] &…
LOC_Os03g50920.1	ZF-HD	2.50395	0.000184402	LOC9272708	LOC_Os03g50920	Os03g0718500	0.062325	0.275425	0.53976	1.50803	2.08305	2.56403	0.000943083	5.67235	up	NA	NA	2	NA	zinc-finger homeodomain protein 11 [Oryza sativa Japonica Group] &gt;A2XLF4.1 RecName: Full=Zinc-finger homeodomain protein 11 [Oryza sativa Indica Group] &gt;Q10DV5.1 RecName: Full=Zinc-finger homeodomain protein 11; Short=OsZHD11 [Oryza sativa Japonica Group] &gt;KAB8093309.1 hypothetical protein EE612_020078 [Oryza sativa] &gt;ABF98569.1 ZF-HD protein dimerisation region containing protein, ex…
LOC_Os12g10630.1	ZF-HD	-2.0055	1.89e-06	LOC4351766	LOC_Os12g10630	Os12g0208900	9.30687	7.29321	9.76533	3.58214	1.26691	2.84252	2.02e-05	0.249049	down	GO:0031410	NA	10	cytoplasmic vesicle	zinc-finger homeodomain protein 3 [Oryza sativa Japonica Group] &gt;Q2QW44.3 RecName: Full=Zinc-finger homeodomain protein 3; Short=OsZHD3 [Oryza sativa Japonica Group]
LOC_Os09g24810.1	ZF-HD	1.99983	4.32e-08	LOC4347053	LOC_Os09g24810	Os09g0414500	10.0479	16.8749	8.13795	70.9401	53.0026	38.6419	8.41e-07	3.99952	up	GO:0005739	NA	9	mitochondrion	NA
LOC_Os04g35500.1	ZF-HD	1.96964	0.00140541	LOC4335893	LOC_Os04g35500	Os04g0434500	0.305648	1.28579	0.25331	2.35598	3.09339	3.04594	0.00513685	3.91671	up	NA	NA	16	NA	NA
LOC_Os09g29130.1	ZF-HD	1.48236	3.95e-06	LOC4347315	LOC_Os09g29130	Os09g0466400	1.34827	2.60323	1.48675	5.10497	5.92064	6.96403	3.77e-05	2.79405	up	NA	NA	20	NA	zinc-finger homeodomain protein 1 [Oryza sativa Japonica Group] &gt;Q6YXH5.1 RecName: Full=Zinc-finger homeodomain protein 1; Short=OsZHD1 [Oryza sativa Japonica Group] &gt;KAB8110915.1 hypothetical protein EE612_048391 [Oryza sativa] &gt;KAF2916595.1 hypothetical protein DAI22_09g131100 [Oryza sativa Japonica Group] &gt;BAD17515.1 putative ZF-HD homeobox protein [Oryza sativa Japonica Group] &gt…
LOC_Os09g24820.1	ZF-HD	1.28339	4.87e-08	LOC4347054	LOC_Os09g24820	Os09g0414600	4.64596	4.14187	3.47274	10.9091	10.1008	14.5814	9.25e-07	2.4341	up	NA	NA	20	NA	zinc-finger homeodomain protein 9 [Oryza sativa Japonica Group] &gt;Q6ER21.2 RecName: Full=Zinc-finger homeodomain protein 9; Short=OsZHD9 [Oryza sativa Japonica Group] &gt;KAF2916175.1 hypothetical protein DAI22_09g098600 [Oryza sativa Japonica Group]

## Sheet: Sheet5
Supplementary Table 9. The list of BPH-responsive transcription factors in all comparisons
Supplementary Table 9-5. The list of BPH-responsive transcription factors in R0 vs RY48
TF_anno	Family	log2FoldChange	pvalue	id	MSU	RAP	R0_1_TPM	R0_2_TPM	R0_3_TPM	RY48_1_TPM	RY48_2_TPM	RY48_3_TPM	padj	FC	direction	GO	KO	protein_cluster	GO_des	Nr_des
LOC_Os02g40070.1	AP2	6.64025	0.00607154	LOC4329975	LOC_Os02g40070	Os02g0614300	0	0	0	0.336227	0.159079	0	0.0185568	99.7505	up	GO:0005739	K09285	6	mitochondrion	AP2-like ethylene-responsive transcription factor PLT2 [Oryza sativa Japonica Group]
LOC_Os03g56050.1	AP2	4.67833	9.93e-09	LOC4334257	LOC_Os03g56050	Os03g0770700	0.033673	0.074415	0	1.27982	1.49458	0.67418	2.05e-07	25.6045	up	NA	K09285	2	NA	NA
LOC_Os03g60430.1;LOC_Os03g60430.2	AP2	-1.25043	7.24e-11	LOC4334582	LOC_Os03g60430	Os03g0818800	20.2209	19.8086	21.9392	10.3531	10.0377	10.8383	2.71e-09	0.420323	down	NA	K09284	8	NA	floral homeotic protein APETALA 2 isoform X1 [Oryza sativa Japonica Group] &gt;Q84TB5.1 RecName: Full=APETALA2-like protein 2; AltName: Full=Protein INDETERMINATE SPIKELET 1; Short=OsIDS1 [Oryza sativa Japonica Group] &gt;AAO65862.1 APETALA2-like protein [Oryza sativa Japonica Group] &gt;AAW78367.1 transcription factor AP2D2 [Oryza sativa Japonica Group] &gt;KAF2942034.1 hypothetical protein DAI2…
LOC_Os04g55560.2;LOC_Os04g55560.3	AP2	-1.21379	6.59e-09	LOC9269072	LOC_Os04g55560	Os04g0649100	45.6984	46.7112	60.4601	26.8038	25.0214	27.8516	1.45e-07	0.431134	down	NA	K09284	8	NA	AP2-like ethylene-responsive transcription factor TOE3 isoform X1 [Oryza sativa Japonica Group] &gt;A0A0N7KJT8.1 RecName: Full=APETALA2-like protein 5; AltName: Full=Protein SHATTERING ABORTION 1 [Oryza sativa Japonica Group] &gt;KAF2936213.1 hypothetical protein DAI22_04g286600 [Oryza sativa Japonica Group] &gt;BAS91337.1 Os04g0649100 [Oryza sativa Japonica Group]
LOC_Os05g03040.1;LOC_Os05g03040.2;LOC_Os05g03040.3	AP2	-1.06249	1.19e-09	LOC4337654	LOC_Os05g03040	Os05g0121600	184.619	170.927	208.823	110.491	113.021	104.693	3.21e-08	0.478804	down	NA	K09284	10	NA	NA
LOC_Os04g56850.1;LOC_Os04g56850.2	ARF	2.59969	0.0168193	LOC4337309	LOC_Os04g56850	Os04g0664400	0.08941	1.76515	0.280924	5.74309	6.98771	2.92916	0.0430193	6.06158	up	GO:0005622;GO:0006417	K14486	16	intracellular; regulation of translation	auxin response factor 11-like isoform X1 [Oryza sativa Japonica Group] &gt;XP_052152973.1 auxin response factor 11 isoform X1 [Oryza glaberrima] &gt;Q01K26.2 RecName: Full=Auxin response factor 11; AltName: Full=OsARF5; AltName: Full=OsMP; AltName: Full=Protein MONOPTEROS-like [Oryza sativa Indica Group] &gt;Q8S983.1 RecName: Full=Auxin response factor 11; AltName: Full=OsARF5; AltName: Full=OsMP…
LOC_Os04g59430.1	ARF	1.66861	0.0104791	LOC9269399	LOC_Os04g59430	Os04g0690600	0.144176	0.379133	0.102152	0.691244	0.826128	0.845454	0.0291567	3.17909	up	GO:0009536	K14486	13	plastid	auxin response factor 13 [Oryza sativa Japonica Group] &gt;Q7XSS9.2 RecName: Full=Auxin response factor 13 [Oryza sativa Japonica Group] &gt;KAF2936682.1 hypothetical protein DAI22_04g320100 [Oryza sativa Japonica Group] &gt;KAF2936683.1 hypothetical protein DAI22_04g320100 [Oryza sativa Japonica Group] &gt;CAE01808.2 OSJNBa0039K24.27 [Oryza sativa Japonica Group] &gt;BAG98756.1 unnamed protein p…
LOC_Os01g67770.1	ARR-B	-1.23799	4.83e-06	LOC4325022	LOC_Os01g67770	Os01g0904700	14.9147	11.8815	16.6384	9.2959	5.99081	7.08365	4.3e-05	0.423963	down	NA	K14491	11	NA	two-component response regulator ORR26 isoform X1 [Oryza sativa Japonica Group] &gt;XP_052140628.1 two-component response regulator ORR26 [Oryza glaberrima] &gt;Q5N6V8.2 RecName: Full=Two-component response regulator ORR26; AltName: Full=OsRRB6 [Oryza sativa Japonica Group] &gt;KAB8084802.1 hypothetical protein EE612_007446 [Oryza sativa] &gt;EEE55842.1 hypothetical protein OsJ_04457 [Oryza sativ…
LOC_Os02g13900.1	BES1	1.93716	4.56e-05	LOC9267338	LOC_Os02g13900	Os02g0233200	0.602867	1.35238	0.750267	3.15673	3.0177	6.01726	0.000290917	3.8295	up	NA	K14503	9	NA	NA
LOC_Os03g17130.1	bHLH	7.13377	1.7e-05	LOC9268995	LOC_Os03g17130	Os03g0279500	0	0	0	0.38775	0.710155	0.252381	0.000124709	140.436	up	NA	NA	2	NA	transcription factor bHLH110 isoform X1 [Oryza sativa Japonica Group] &gt;XP_015630127.1 transcription factor bHLH110 isoform X1 [Oryza sativa Japonica Group] &gt;KAF2938622.1 hypothetical protein DAI22_03g131300 [Oryza sativa Japonica Group] &gt;KAF2938623.1 hypothetical protein DAI22_03g131300 [Oryza sativa Japonica Group]
LOC_Os11g39000.1;LOC_Os11g39000.2	bHLH	7.05531	0.00215364	LOC4350872	LOC_Os11g39000	Os11g0603000	0	0	0	0	0.713341	2.27502	0.00774707	133.003	up	NA	NA	18	NA	transcription factor ILI2 isoform X1 [Oryza sativa Japonica Group] &gt;B8BLA3.1 RecName: Full=Transcription factor ILI2; Short=OsILI2; AltName: Full=Protein INCREASED LEAF INCLINATION 2 [Oryza sativa Indica Group] &gt;Q2R1J3.1 RecName: Full=Transcription factor ILI2; Short=OsILI2; AltName: Full=Protein INCREASED LEAF INCLINATION 2 [Oryza sativa Japonica Group] &gt;KAB8115806.1 hypothetical protei…
LOC_Os01g72370.1;LOC_Os01g72370.2;LOC_Os01g72370.3	bHLH	-6.51198	8.45e-06	LOC4325750	LOC_Os01g72370	Os01g0952800	6.27573	3.14776	13.9611	0.021997	0	0.247067	6.94e-05	0.0109572	down	NA	NA	15	NA	protein IRON-RELATED TRANSCRIPTION FACTOR 2 isoform X1 [Oryza sativa Japonica Group] &gt;XP_052155250.1 protein IRON-RELATED TRANSCRIPTION FACTOR 2 isoform X1 [Oryza glaberrima] &gt;A2WZ60.1 RecName: Full=Protein IRON-RELATED TRANSCRIPTION FACTOR 2; Short=OsIRO2 [Oryza sativa Indica Group] &gt;EAY77256.1 hypothetical protein OsI_05230 [Oryza sativa Indica Group] &gt;EAZ14859.1 hypothetical protei…
LOC_Os01g33400.1	bHLH	6.44781	0.000471473	LOC112937659	LOC_Os01g33400	Os01g0518300	0	0	0	0.261427	0.258334	0.388675	0.0021382	87.2941	up	NA	NA	13	NA	uncharacterized protein LOC112937659 [Oryza sativa Japonica Group] &gt;EAY74301.1 hypothetical protein OsI_02190 [Oryza sativa Indica Group] &gt;EAY74305.1 hypothetical protein OsI_02194 [Oryza sativa Indica Group] &gt;KAF2950445.1 hypothetical protein DAI22_01g188500 [Oryza sativa Japonica Group] &gt;BAB91948.1 hypothetical protein [Oryza sativa Japonica Group]
LOC_Os05g07120.1;LOC_Os05g07120.2	bHLH	5.86476	0.00548692	LOC4337905	LOC_Os05g07120	Os05g0163900	0	0	0	0.150822	0.364079	0.059141	0.0170712	58.2732	up	NA	NA	20	NA	putative transcription factor bHLH107 [Oryza sativa Japonica Group] &gt;XP_015638378.1 putative transcription factor bHLH107 [Oryza sativa Japonica Group] &gt;XP_015638379.1 putative transcription factor bHLH107 [Oryza sativa Japonica Group] &gt;KAB8098250.1 hypothetical protein EE612_027316 [Oryza sativa] &gt;AAT07662.1 unknown protein [Oryza sativa Japonica Group] &gt;AAT69620.1 unknown protein…
LOC_Os02g12820.1	bHLH	-4.45518	0.00437893	LOC9269769	LOC_Os02g12820	Os02g0221100	0.086516	0.077202	0.23881	0	0	0.017289	0.0140775	0.0455886	down	NA	NA	10	NA	putative transcription factor bHLH041 [Oryza sativa Japonica Group]
LOC_Os06g10820.1	bHLH	4.10415	1.89e-06	LOC107275851	LOC_Os06g10820	Os06g0210600	0	0.15017	0.126443	1.47813	1.12261	3.06681	1.9e-05	17.1978	up	NA	NA	13	NA	transcription factor HEC2 [Oryza sativa Japonica Group] &gt;KAF2925764.1 hypothetical protein DAI22_06g076400 [Oryza sativa Japonica Group] &gt;BAS96738.1 Os06g0210600 [Oryza sativa Japonica Group]
LOC_Os03g46860.1	bHLH	3.789	6.22e-10	LOC4333691	LOC_Os03g46860	Os03g0671800	0.123453	1.06151	0.22561	6.68612	11.1165	5.7261	1.81e-08	13.823	up	GO:0005634;GO:0006355;GO:0140110	NA	20	nucleus; regulation of transcription, DNA-templated; transcription regulator activity	transcription factor NAI1 [Oryza sativa Japonica Group] &gt;KAB8092965.1 hypothetical protein EE612_019573 [Oryza sativa] &gt;ABF98126.1 Helix-loop-helix DNA-binding domain containing protein, expressed [Oryza sativa Japonica Group] &gt;ADX60274.1 bHLH transcription factor, partial [Oryza sativa Japonica Group] &gt;KAF2940602.1 hypothetical protein DAI22_03g285200 [Oryza sativa Japonica Group] &g…
LOC_Os04g23550.1;LOC_Os04g23550.2	bHLH	3.57398	0.00452955	LOC4335417	LOC_Os04g23550	Os04g0301500	2.88962	0.480913	0.317961	2.31861	30.3859	22.552	0.0145007	11.909	up	NA	NA	1	NA	NA
LOC_Os08g37290.1	bHLH	3.10287	0.00101829	LOC4345836	LOC_Os08g37290	Os08g0477900	0.112081	0.235565	0	1.20316	1.16259	1.18603	0.00410714	8.59126	up	NA	NA	2	NA	transcription factor AIG1 [Oryza sativa Japonica Group] &gt;KAB8108880.1 hypothetical protein EE612_044911 [Oryza sativa] &gt;KAF2920123.1 hypothetical protein DAI22_08g186800 [Oryza sativa Japonica Group] &gt;BAD09003.1 bHLH protein family-like [Oryza sativa Japonica Group] &gt;BAF23961.1 Os08g0477900 [Oryza sativa Japonica Group] &gt;BAT05896.1 Os08g0477900 [Oryza sativa Japonica Group]
LOC_Os10g40740.1	bHLH	-2.87946	3.17e-15	LOC4349351	LOC_Os10g40740	Os10g0556200	31.9846	13.9251	33.8847	5.60978	4.45657	2.8173	3.09e-13	0.135893	down	GO:0005634;GO:0006355;GO:0140110	NA	10	nucleus; regulation of transcription, DNA-templated; transcription regulator activity	transcription factor UNE10 isoform X1 [Oryza sativa Japonica Group] &gt;XP_015612717.1 transcription factor UNE10 isoform X1 [Oryza sativa Japonica Group] &gt;EEC67419.1 hypothetical protein OsI_34609 [Oryza sativa Indica Group] &gt;KAB8113636.1 hypothetical protein EE612_052712 [Oryza sativa] &gt;KAF2914765.1 hypothetical protein DAI22_10g187600 [Oryza sativa Japonica Group] &gt;BAT11999.1 Os10g…
LOC_Os01g50940.1	bHLH	2.44789	4.03e-07	LOC4327669	LOC_Os01g50940	Os01g0705700	1.81563	3.3577	2.37283	5.06066	23.7232	20.5465	5.03e-06	5.45619	up	NA	K25801	20	NA	transcription factor bHLH13 [Oryza sativa Japonica Group] &gt;EAZ13257.1 hypothetical protein OsJ_03182 [Oryza sativa Japonica Group] &gt;KAF2951888.1 hypothetical protein DAI22_01g295800 [Oryza sativa Japonica Group]
LOC_Os03g56950.1;LOC_Os03g56950.2;LOC_Os03g56950.3;LOC_Os03g56950.4;LOC_Os03g56950.5;LOC_Os03g56950.6;LOC_Os03g56950.7	bHLH	-2.25741	1.52e-09	LOC4334324	LOC_Os03g56950	Os03g0782500	48.7023	19.8547	49.8643	11.8624	8.68668	11.0883	4e-08	0.209147	down	NA	K16189	10	NA	transcription factor PHYTOCHROME INTERACTING FACTOR-LIKE 13-like isoform X1 [Oryza sativa Japonica Group]
LOC_Os01g38610.1	bHLH	-2.22244	1.03e-07	LOC4327934	LOC_Os01g38610	Os01g0566800	19.9984	8.88659	14.5202	5.61991	2.12831	3.60765	1.56e-06	0.214278	down	NA	NA	10	NA	transcription factor LATE FLOWERING-like [Oryza sativa Japonica Group] &gt;XP_015629741.1 transcription factor LATE FLOWERING-like [Oryza sativa Japonica Group] &gt;KAF2950805.1 hypothetical protein DAI22_01g212500 [Oryza sativa Japonica Group] &gt;KAF2950806.1 hypothetical protein DAI22_01g212500 [Oryza sativa Japonica Group] &gt;BAS72758.1 Os01g0566800 [Oryza sativa Japonica Group]
LOC_Os05g42180.1	bHLH	-2.11675	4.83e-07	LOC4339235	LOC_Os05g42180	Os05g0501200	2.23655	1.43704	2.55008	0.392994	0.727814	0.620944	5.86e-06	0.230566	down	NA	NA	10	NA	transcription factor bHLH68 isoform X1 [Oryza sativa Japonica Group]
LOC_Os02g47660.1	bHLH	2.08347	7.75e-12	LOC4330462	LOC_Os02g47660	Os02g0705500	3.09261	4.32412	3.25183	13.8641	16.7012	23.3925	3.7e-10	4.23826	up	GO:0005634;GO:0006355;GO:0140110	NA	7	nucleus; regulation of transcription, DNA-templated; transcription regulator activity	transcription factor bHLH63 [Oryza sativa Japonica Group] &gt;XP_052141575.1 transcription factor bHLH63-like [Oryza glaberrima] &gt;KAB8088539.1 hypothetical protein EE612_013176 [Oryza sativa] &gt;KAF2946558.1 hypothetical protein DAI22_02g302900 [Oryza sativa Japonica Group] &gt;BAD08039.1 putative bHLH transcription factor [Oryza sativa Japonica Group] &gt;BAF09782.1 Os02g0705500 [Oryza sativ…
LOC_Os08g08160.1	bHLH	-2.0003	0.000179335	LOC9271688	LOC_Os08g08160	Os08g0179400	1.11977	0.985888	0.590295	0.232178	0.255696	0.321571	0.000934592	0.249949	down	NA	NA	10	NA	transcription factor bHLH112 isoform X1 [Oryza sativa Japonica Group] &gt;KAF2918379.1 hypothetical protein DAI22_08g054000 [Oryza sativa Japonica Group] &gt;KAF2918381.1 hypothetical protein DAI22_08g054000 [Oryza sativa Japonica Group]
LOC_Os03g26210.1;LOC_Os03g26210.2;LOC_Os03g26210.3	bHLH	-1.95438	7.85e-15	LOC4332972	LOC_Os03g26210	Os03g0379300	17.3894	21.3226	28.1908	7.81579	6.92465	6.22248	6.8e-13	0.258032	down	NA	NA	12	NA	transcription factor BHLH062-like [Oryza sativa Japonica Group] &gt;XP_015633302.1 transcription factor BHLH062-like [Oryza sativa Japonica Group] &gt;Q10KL8.1 RecName: Full=Protein IRON-RELATED TRANSCRIPTION FACTOR 3; Short=OsIRO2; AltName: Full=Basic helix-loop-helix protein 63; Short=OsbHLH063; AltName: Full=Transcription factor BHLH063; AltName: Full=bHLH transcription factor bHLH063 [Oryza s…
LOC_Os10g26460.1	bHLH	1.81823	7.67e-05	LOC107277392	LOC_Os10g26460	Os10g0404300	3.63932	2.44778	1.62128	8.30515	9.77831	14.6613	0.000450832	3.52649	up	NA	NA	16	NA	transcription factor ILI7 [Oryza sativa Japonica Group] &gt;Q338G6.1 RecName: Full=Transcription factor ILI7; Short=OsILI7; AltName: Full=Basic helix-loop-helix protein 173; Short=OsbHLH173; AltName: Full=Protein INCREASED LEAF INCLINATION 7; AltName: Full=bHLH transcription factor bHLH173 [Oryza sativa Japonica Group] &gt;ABB47567.1 hypothetical protein LOC_Os10g26460 [Oryza sativa Japonica Grou…
LOC_Os07g05010.1;LOC_Os07g05010.2;LOC_Os07g05010.3	bHLH	-1.79302	7.92e-11	LOC4342383	LOC_Os07g05010	Os07g0143200	39.954	31.9904	48.9233	18.1103	10.8963	12.7992	2.91e-09	0.288567	down	NA	K16189	8	NA	transcription factor PHYTOCHROME INTERACTING FACTOR-LIKE 13-like isoform X1 [Oryza sativa Japonica Group] &gt;XP_015648044.1 transcription factor PHYTOCHROME INTERACTING FACTOR-LIKE 13-like isoform X1 [Oryza sativa Japonica Group] &gt;XP_015648045.1 transcription factor PHYTOCHROME INTERACTING FACTOR-LIKE 13-like isoform X1 [Oryza sativa Japonica Group] &gt;KAF2921402.1 hypothetical protein DAI22…
LOC_Os03g43810.1	bHLH	-1.76148	1.78e-11	LOC9270162	LOC_Os03g43810	Os03g0639300	17.1306	14.4418	22.7156	5.4209	7.53308	6.54447	7.85e-10	0.294945	down	NA	K16189	8	NA	transcription factor PHYTOCHROME INTERACTING FACTOR-LIKE 13-like isoform X1 [Oryza sativa Japonica Group]
LOC_Os02g49480.1	bHLH	1.75138	1.74e-08	LOC4330593	LOC_Os02g49480	Os02g0726700	1.33551	3.37887	2.40242	8.75764	10.547	9.42633	3.37e-07	3.36681	up	NA	NA	7	NA	transcription factor BIM2 [Oryza sativa Japonica Group] &gt;XP_015627559.1 transcription factor BIM2 [Oryza sativa Japonica Group] &gt;XP_015627560.1 transcription factor BIM2 [Oryza sativa Japonica Group] &gt;EEE57728.1 hypothetical protein OsJ_08226 [Oryza sativa Japonica Group] &gt;KAF2946739.1 hypothetical protein DAI22_02g317600 [Oryza sativa Japonica Group]
LOC_Os02g35660.1	bHLH	-1.59314	4.16e-06	LOC4329698	LOC_Os02g35660	Os02g0564700	2.04987	2.59683	2.56858	1.25802	0.768432	0.859971	3.77e-05	0.33145	down	NA	NA	8	NA	transcription factor bHLH68 [Oryza sativa Japonica Group] &gt;KAB8087536.1 hypothetical protein EE612_011840 [Oryza sativa] &gt;EEE57212.1 hypothetical protein OsJ_07173 [Oryza sativa Japonica Group] &gt;KAF2945368.1 hypothetical protein DAI22_02g212400 [Oryza sativa Japonica Group] &gt;BAD15821.1 putative bHLH transcription factor PTF1 [Oryza sativa Japonica Group] &gt;BAH01152.1 unnamed protein…
LOC_Os09g34330.1	bHLH	-1.56517	0.00430305	LOC4347601	LOC_Os09g34330	Os09g0519100	1.45524	1.13122	1.49011	0.284584	0.776607	0.604242	0.0138834	0.337938	down	NA	NA	8	NA	transcription factor MYC2 [Oryza sativa Japonica Group] &gt;XP_052168298.1 transcription factor MYC2-like [Oryza glaberrima] &gt;EAZ09780.1 hypothetical protein OsI_32068 [Oryza sativa Indica Group] &gt;KAF2917099.1 hypothetical protein DAI22_09g167500 [Oryza sativa Japonica Group] &gt;BAD34411.1 putative MYC-related DNA binding protein [Oryza sativa Japonica Group] &gt;BAD54698.1 putative MYC-re…
LOC_Os05g46370.1	bHLH	1.55228	2.74e-05	LOC9269440	LOC_Os05g46370	Os05g0541400	0.829512	0.682605	0.724293	2.03321	2.78786	3.09827	0.000187668	2.93281	up	NA	NA	9	NA	transcription factor LATE FLOWERING [Oryza sativa Japonica Group] &gt;A0A0P0WQ90.1 RecName: Full=Transcription factor LATE FLOWERING; Short=OsLF; AltName: Full=Basic helix-loop-helix protein 119; Short=OsbHLH119 [Oryza sativa Japonica Group] &gt;BAS95124.1 Os05g0541400 [Oryza sativa Japonica Group]
LOC_Os06g50900.1	bHLH	1.43239	0.000602796	LOC9271931	LOC_Os06g50900	Os06g0724800	2.3887	9.51914	4.09537	17.5255	19.736	14.3504	0.00262708	2.69893	up	NA	NA	2	NA	transcription factor bHLH93 [Oryza sativa Japonica Group] &gt;EEC81330.1 hypothetical protein OsI_24504 [Oryza sativa Indica Group] &gt;KAF2928565.1 hypothetical protein DAI22_06g288300 [Oryza sativa Japonica Group]
LOC_Os10g23050.1	bHLH	1.41894	0.000377226	LOC4348490	LOC_Os10g23050	Os10g0376900	1.06923	2.99581	1.50939	5.5163	6.24033	6.0287	0.0017731	2.67389	up	NA	NA	7	NA	transcription factor bHLH96 [Oryza sativa Japonica Group] &gt;KAB8112544.1 hypothetical protein EE612_051020 [Oryza sativa] &gt;AAM08539.1 Putative helix-loop-helix DNA-binding protein [Oryza sativa Japonica Group] &gt;AAP53429.1 Helix-loop-helix DNA-binding domain containing protein, expressed [Oryza sativa Japonica Group] &gt;EAZ15885.1 hypothetical protein OsJ_31307 [Oryza sativa Japonica Grou…
LOC_Os03g53020.1	bHLH	1.37107	0.00311517	LOC4334060	LOC_Os03g53020	Os03g0741100	2.66221	0.966891	2.10891	5.04639	10.4946	3.19634	0.0105817	2.58663	up	NA	NA	5	NA	NA
LOC_Os03g08930.1	bHLH	1.36887	0.016852	LOC4331887	LOC_Os03g08930	Os03g0188400	1.47988	5.50168	1.07984	4.71098	9.4147	10.3239	0.0430776	2.58269	up	NA	NA	2	NA	transcription factor bHLH96 [Oryza sativa Japonica Group] &gt;AAN64142.1 Unknown protein [Oryza sativa Japonica Group] &gt;ABF94380.1 Helix-loop-helix DNA-binding domain containing protein, expressed [Oryza sativa Japonica Group] &gt;ADX60278.1 bHLH transcription factor, partial [Oryza sativa Japonica Group] &gt;KAF2937705.1 hypothetical protein DAI22_03g068800 [Oryza sativa Japonica Group] &gt;B…
LOC_Os08g42470.1	bHLH	1.32121	0.00278788	LOC4346166	LOC_Os08g42470	Os08g0536800	5.01844	20.4676	7.85892	23.9576	35.9247	38.3279	0.00965814	2.49875	up	NA	NA	16	NA	transcription factor bHLH137 isoform X1 [Oryza sativa Japonica Group] &gt;EAZ07795.1 hypothetical protein OsI_30053 [Oryza sativa Indica Group] &gt;EAZ43484.1 hypothetical protein OsJ_28098 [Oryza sativa Japonica Group] &gt;KAF2920698.1 hypothetical protein DAI22_08g231000 [Oryza sativa Japonica Group]
LOC_Os03g07540.1	bHLH	1.27274	0.00398801	LOC4331778	LOC_Os03g07540	Os03g0171700	4.26889	17.7606	8.52266	23.5408	27.5545	35.7632	0.013014	2.4162	up	NA	NA	20	NA	NA
LOC_Os01g11910.1	bHLH	-1.2546	0.0149053	LOC4324583	LOC_Os01g11910	Os01g0218100	0.7284	1.95997	2.26568	1.19997	0.699515	0.613386	0.0389837	0.419109	down	NA	NA	12	NA	transcription factor bHLH30 [Oryza sativa Japonica Group] &gt;EAY73039.1 hypothetical protein OsI_00913 [Oryza sativa Indica Group] &gt;KAB8080517.1 hypothetical protein EE612_001078 [Oryza sativa] &gt;KAF2949092.1 hypothetical protein DAI22_01g082800 [Oryza sativa Japonica Group] &gt;BAB16490.1 DNA binding protein-like [Oryza sativa Japonica Group] &gt;BAC00537.1 DNA binding protein-like [Oryza …
LOC_Os05g38140.1	bHLH	-1.20701	2.09e-08	LOC4338978	LOC_Os05g38140	Os05g0455400	44.3743	44.8534	47.3537	23.329	20.9155	26.9613	3.93e-07	0.433164	down	NA	NA	10	NA	transcription factor ILR3 [Oryza sativa Japonica Group] &gt;XP_052154855.1 transcription factor ILR3-like [Oryza glaberrima] &gt;KAF2931083.1 hypothetical protein DAI22_05g183900 [Oryza sativa Japonica Group]
LOC_Os01g01600.1	bHLH	1.18975	0.0141449	LOC4326301	LOC_Os01g01600	Os01g0105700	0.746022	2.91317	1.2711	4.74824	5.69586	3.14604	0.0373637	2.28113	up	NA	NA	16	NA	NA
LOC_Os03g58330.1	bHLH	-1.16912	1.69e-05	LOC4334429	LOC_Os03g58330	Os03g0797600	30.7457	20.632	30.4828	16.5987	12.5865	15.4734	0.000124605	0.444692	down	NA	NA	11	NA	transcription factor UNE12 isoform X1 [Oryza sativa Japonica Group] &gt;XP_052150139.1 transcription factor UNE12-like [Oryza glaberrima] &gt;EEC76334.1 hypothetical protein OsI_13903 [Oryza sativa Indica Group] &gt;KAB8093992.1 hypothetical protein EE612_021015 [Oryza sativa] &gt;AAP44685.1 unknown protein [Oryza sativa Japonica Group] &gt;ABF99356.1 Lipoamide dehydrogenase, putative, expressed …
LOC_Os01g01840.1	bHLH	-1.10864	0.00615186	LOC4326162	LOC_Os01g01840	Os01g0108400	45.2652	37.2873	54.0971	12.5455	45.7148	20.1763	0.0187632	0.463731	down	NA	NA	11	NA	transcription factor bHLH167 isoform X1 [Oryza sativa Japonica Group]
LOC_Os01g55150.1	bZIP	2.42725	1.17e-09	LOC4325139	LOC_Os01g55150	Os01g0756200	7.6681	19.8165	10.7258	48.3693	78.3401	115.108	3.17e-08	5.37866	up	NA	NA	9	NA	basic leucine zipper 6 isoform X2 [Oryza sativa Japonica Group]
LOC_Os04g41820.1	bZIP	2.345	1.51e-06	LOC4336273	LOC_Os04g41820	Os04g0495500	0.879624	5.26993	2.20501	15.0705	19.261	16.05	1.57e-05	5.0806	up	GO:0031410	K20557	2	cytoplasmic vesicle	transcription factor RF2a-like [Oryza sativa Japonica Group] &gt;EAZ31218.1 hypothetical protein OsJ_15316 [Oryza sativa Japonica Group] &gt;CAD41260.1 OSJNBa0067K08.2 [Oryza sativa Japonica Group]
LOC_Os08g38020.1	bZIP	-2.31856	0.00164477	LOC4345889	LOC_Os08g38020	Os08g0487100	1.81779	0.907857	0.909828	0.399254	0.436938	0.080748	0.00616853	0.200468	down	NA	K25786	17	NA	NA
LOC_Os02g14910.1	bZIP	1.99387	4.54e-06	LOC4328871	LOC_Os02g14910	Os02g0247100	2.66869	8.33851	6.17804	14.8897	31.0052	35.1772	4.07e-05	3.98303	up	NA	NA	9	NA	NA
LOC_Os09g31390.1;LOC_Os09g31390.2;LOC_Os09g31390.3	bZIP	-1.87581	0.00383667	LOC4347436	LOC_Os09g31390	Os09g0489500	0.640013	0.415127	0.437364	0.256028	0.093226	0.137328	0.0125834	0.272473	down	NA	K14431	10	NA	transcription factor TGA2 isoform X1 [Oryza sativa Japonica Group] &gt;KAB8111095.1 hypothetical protein EE612_048646 [Oryza sativa] &gt;EEE69952.1 hypothetical protein OsJ_29832 [Oryza sativa Japonica Group] &gt;KAF2916800.1 hypothetical protein DAI22_09g146700 [Oryza sativa Japonica Group] &gt;BAG95936.1 unnamed protein product [Oryza sativa Japonica Group] &gt;BAT08721.1 Os09g0489500 [Oryza sa…
LOC_Os01g36220.1	bZIP	-1.65855	1.67e-06	LOC4326871	LOC_Os01g36220	Os01g0542700	8.41648	8.32127	5.61164	3.70385	1.92016	2.88981	1.72e-05	0.316758	down	GO:0003677;GO:0005634;GO:0006355;GO:0009536	K25786	8	DNA binding; nucleus; regulation of transcription, DNA-templated; plastid	ocs element-binding factor 1 [Oryza sativa Japonica Group] &gt;KAF2950607.1 hypothetical protein DAI22_01g199800 [Oryza sativa Japonica Group] &gt;BAB89252.1 unknown protein [Oryza sativa Japonica Group] &gt;BAC10897.1 unknown protein [Oryza sativa Japonica Group] &gt;BAF05187.1 Os01g0542700 [Oryza sativa Japonica Group] &gt;BAG98976.1 unnamed protein product [Oryza sativa Japonica Group]
LOC_Os09g10840.1;LOC_Os09g10840.2	bZIP	-1.65824	7.91e-06	LOC4346610	LOC_Os09g10840	Os09g0280500	4.20158	2.7441	2.83126	1.55984	0.971757	1.12234	6.55e-05	0.316825	down	NA	K14431	8	NA	transcription factor TGAL7 isoform X1 [Oryza sativa Japonica Group] &gt;EAZ44039.1 hypothetical protein OsJ_28661 [Oryza sativa Japonica Group] &gt;KAF2915431.1 hypothetical protein DAI22_09g033700 [Oryza sativa Japonica Group]
LOC_Os10g38820.1	bZIP	1.60254	0.000733135	LOC4349212	LOC_Os10g38820	Os10g0531900	0.217283	0.685929	0.625634	1.59618	1.85662	1.78957	0.00310754	3.03678	up	NA	K20557	6	NA	NA
LOC_Os06g15480.1;LOC_Os06g15480.2	bZIP	1.5625	0.000397465	LOC4340708	LOC_Os06g15480	Os06g0265400	0.357002	1.01486	0.70909	2.616	3.16515	1.76266	0.00185082	2.95366	up	NA	K14431	2	NA	transcription factor TGAL3-like isoform X3 [Oryza sativa Japonica Group]
LOC_Os07g48180.1	bZIP	1.55264	0.000126553	LOC4344292	LOC_Os07g48180	Os07g0679500	2.27981	9.23259	4.94114	18.6621	20.6451	18.2059	0.000690119	2.93354	up	NA	K20557	2	NA	transcription factor RF2b-like [Oryza sativa Japonica Group]
LOC_Os01g11350.1	bZIP	1.51613	0.000823453	LOC4325565	LOC_Os01g11350	Os01g0211800	3.00326	13.4521	9.78593	19.2806	34.8834	34.8178	0.00343158	2.86023	up	NA	NA	9	NA	NA
LOC_Os01g58760.1	bZIP	-1.46769	8.2e-05	LOC107278258	LOC_Os01g58760	Os01g0801901	6.86767	3.40688	4.80935	1.8256	2.12114	2.67256	0.000475656	0.361561	down	NA	K25785	8	NA	basic leucine zipper 23 [Oryza sativa Japonica Group] &gt;XP_015618034.1 basic leucine zipper 23 [Oryza sativa Japonica Group] &gt;XP_052153223.1 basic leucine zipper 23-like [Oryza glaberrima] &gt;XP_052153230.1 basic leucine zipper 23-like [Oryza glaberrima] &gt;KAB8083920.1 hypothetical protein EE612_006319 [Oryza sativa] &gt;KAF2952842.1 hypothetical protein DAI22_01g366800 [Oryza sativa Japo…
LOC_Os03g21800.1;LOC_Os03g21800.2	bZIP	1.42466	4.02e-06	LOC4332761	LOC_Os03g21800	Os03g0336200	5.51171	12.9666	9.89464	25.7349	31.6797	33.444	3.67e-05	2.68451	up	NA	K20557	9	NA	NA
LOC_Os03g20650.1	bZIP	-1.38849	2.71e-07	LOC107277499	LOC_Os03g20650	Os03g0322700	5.83038	8.0934	8.08594	4.08968	3.52153	2.61236	3.58e-06	0.381964	down	NA	K14432	17	NA	ABSCISIC ACID-INSENSITIVE 5-like protein 2 [Oryza sativa Japonica Group] &gt;XP_052149537.1 ABSCISIC ACID-INSENSITIVE 5-like protein 2 [Oryza glaberrima] &gt;KAF2939013.1 hypothetical protein DAI22_03g160500 [Oryza sativa Japonica Group]
LOC_Os02g33560.1	bZIP	1.29216	4.88e-05	LOC4329583	LOC_Os02g33560	Os02g0538900	3.69439	9.19058	5.56292	19.111	20.5741	14.7435	0.000307806	2.44894	up	NA	NA	2	NA	basic leucine zipper 34 [Oryza sativa Japonica Group] &gt;AEP20528.1 b-zip protein [Oryza sativa Japonica Group] &gt;KAF2945174.1 hypothetical protein DAI22_02g198400 [Oryza sativa Japonica Group] &gt;BAD27924.1 bZIP protein-like [Oryza sativa Japonica Group] &gt;BAD28835.1 bZIP protein-like [Oryza sativa Japonica Group] &gt;BAF08969.1 Os02g0538900 [Oryza sativa Japonica Group]
LOC_Os02g10860.1	bZIP	-1.23	3.33e-08	LOC4328662	LOC_Os02g10860	Os02g0203000	41.9946	43.9415	53.5648	29.0897	22.2442	20.9462	5.9e-07	0.426317	down	GO:0009536	K16241	8	plastid	transcription factor HY5 [Oryza sativa Japonica Group] &gt;KAB8086364.1 hypothetical protein EE612_009594 [Oryza sativa] &gt;BAS77535.1 Os02g0203000 [Oryza sativa Japonica Group]
[truncated: 260 more rows]
